# Supplementary material for: Synergic effect of pore size engineering and an applied electric field on the controlled permeation of alkali metal atoms and ions across pristine and defect-containing h-BN sheets
Source: Royal Society of Chemistry journal article supplement (doi:10.1039/c9nj03962g), 2020-01-01
Supplement: c9nj03962g1.pdf [file c9nj03962g1.pdf]

## Supporting Information

### **Synergic effect of pore size engineering and applied electric field on the controlled permeation of alkali metal atoms and ions across pristine and defected *h*-BN sheet**

Sajida Munsif<sup>a</sup>, Naveen Kosar<sup>a</sup>, Muhammad Ali Hashmi<sup>b</sup>, Tariq Mahmood<sup>a</sup>, Mazhar Amjad Gilani<sup>c</sup>,  
Khurshid Ayub<sup>a,\*</sup>

<sup>a</sup>Department of Chemistry, COMSATS University, Abbottabad, KPK, Pakistan 22060

<sup>b</sup>Department of Chemistry, University of Education, Attock Campus, Punjab, Pakistan, 43600

<sup>c</sup>Department of Chemistry, COMSATS University, Lahore Campus, Lahore

#### **Corresponding Authors**

Khurshid Ayub

Tel: +92-992-383591

Fax: +92-992-383441

E.mail: [Khurshid@cuiatd.edu.pk](mailto:Khurshid@cuiatd.edu.pk)

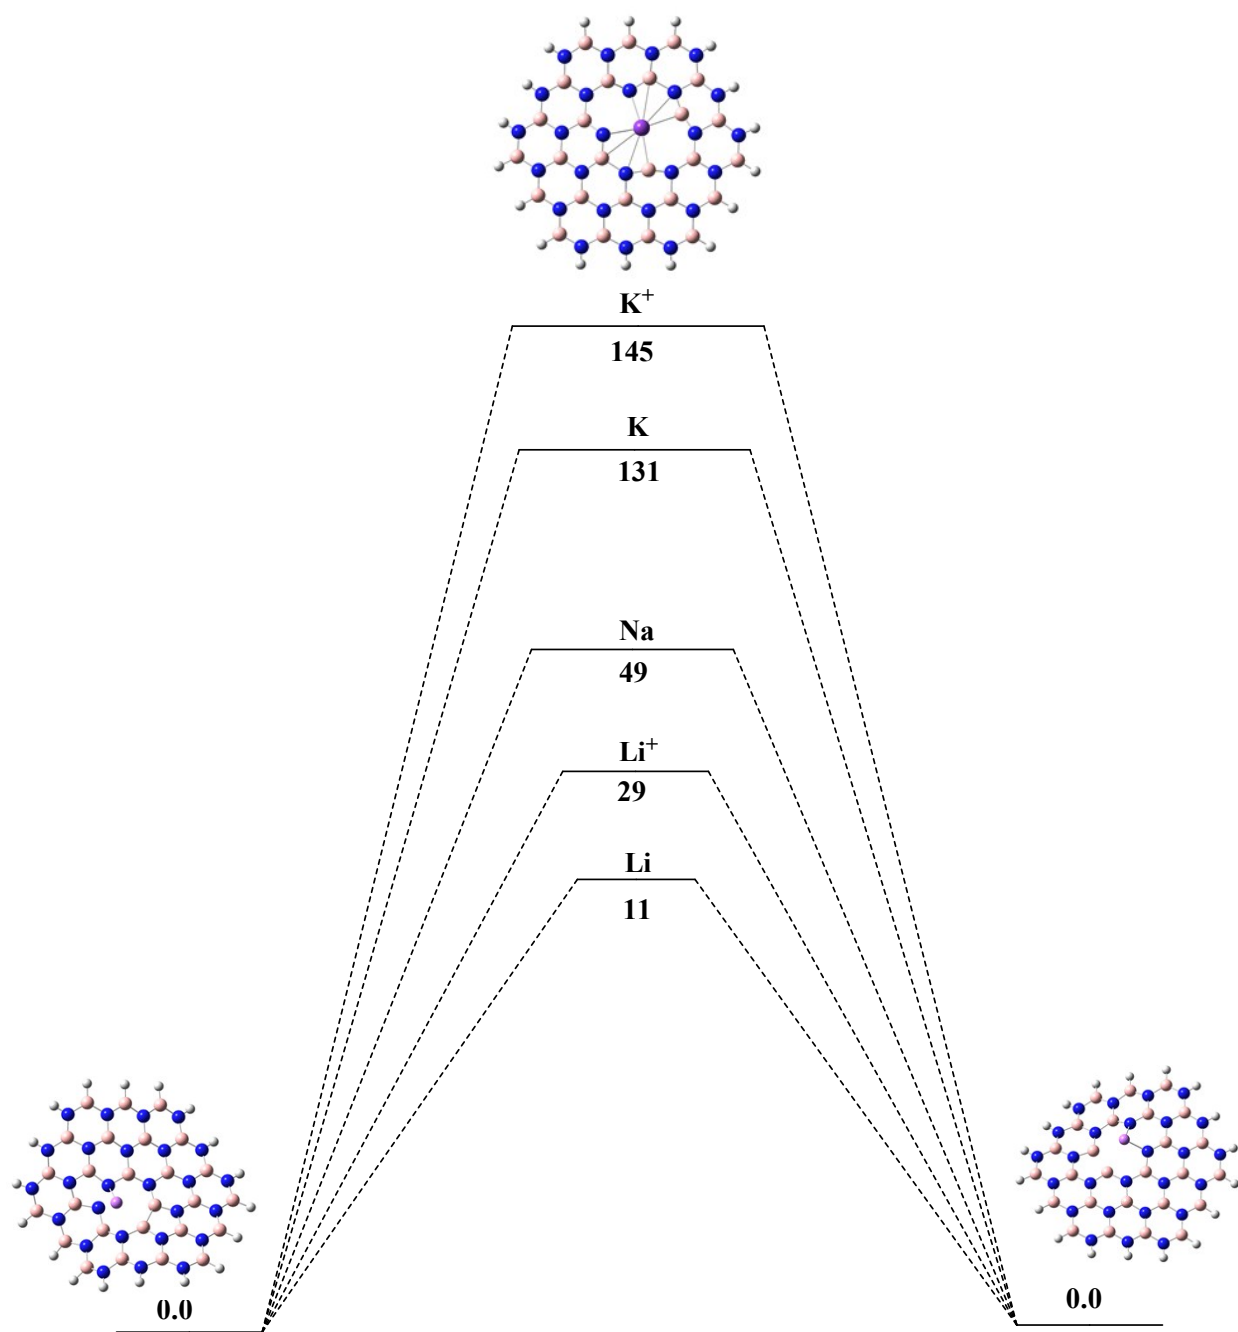

**Figure S1** Energy profile diagram showing energy barriers (kcal mol<sup>-1</sup>) for the permeation of alkali metal atoms/ions across V<sub>BN</sub> *h*-BN.

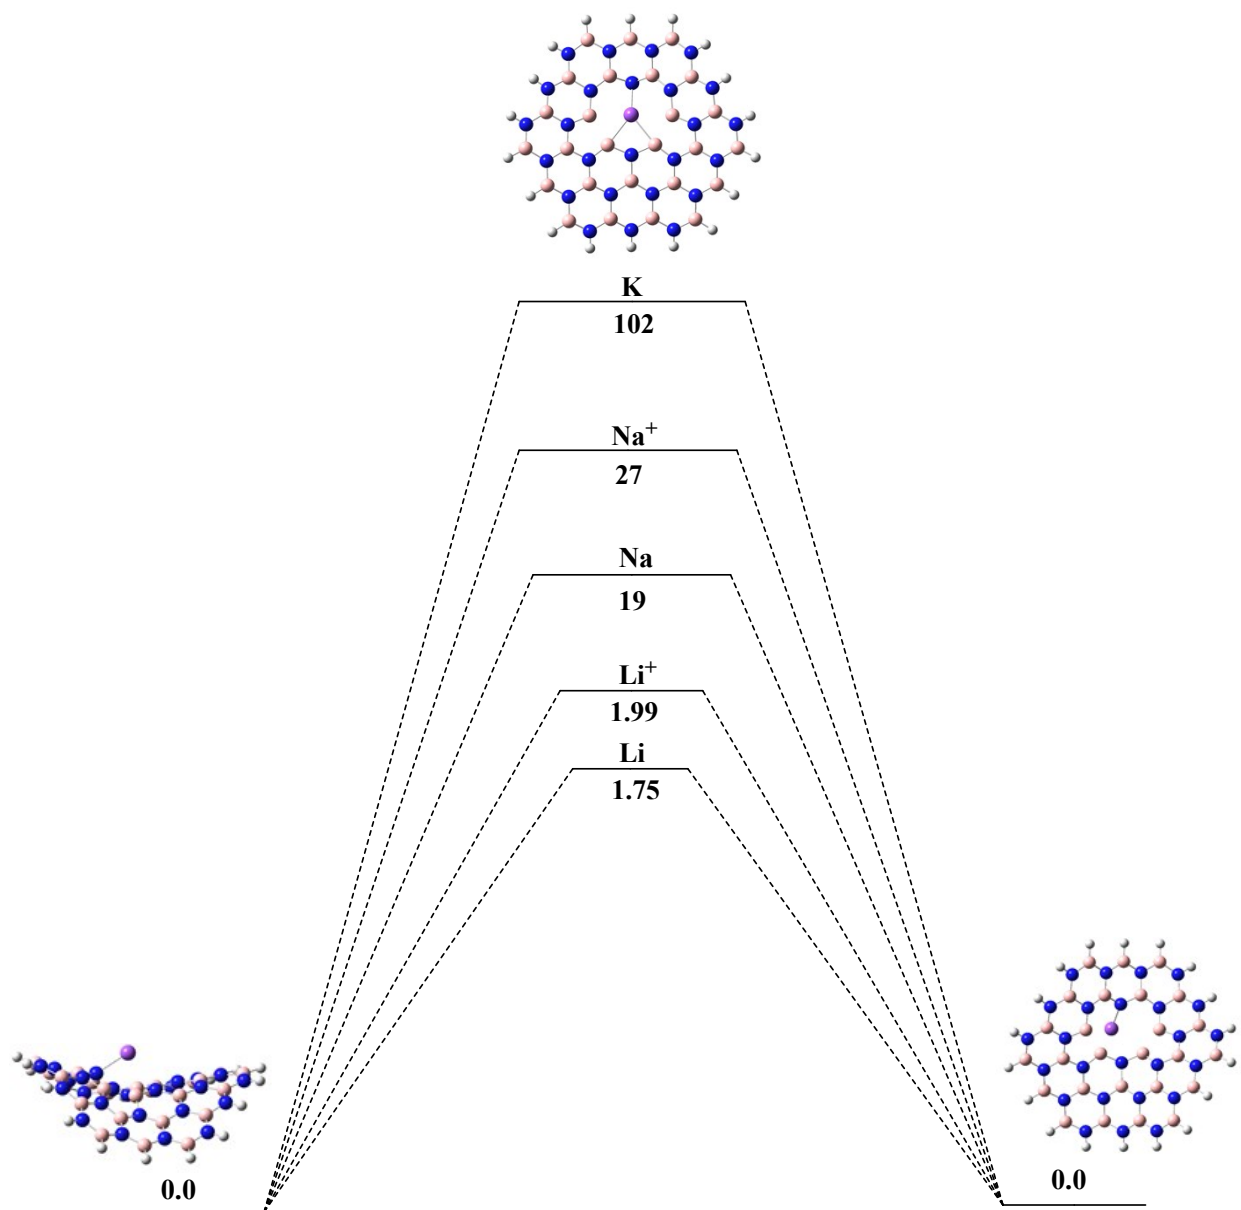

**Figure S2** Energy profile diagram showing energy barriers (kcal mol<sup>-1</sup>) for the permeation of alkali metal atoms/ions across V<sub>N2B</sub> *h*-BN.

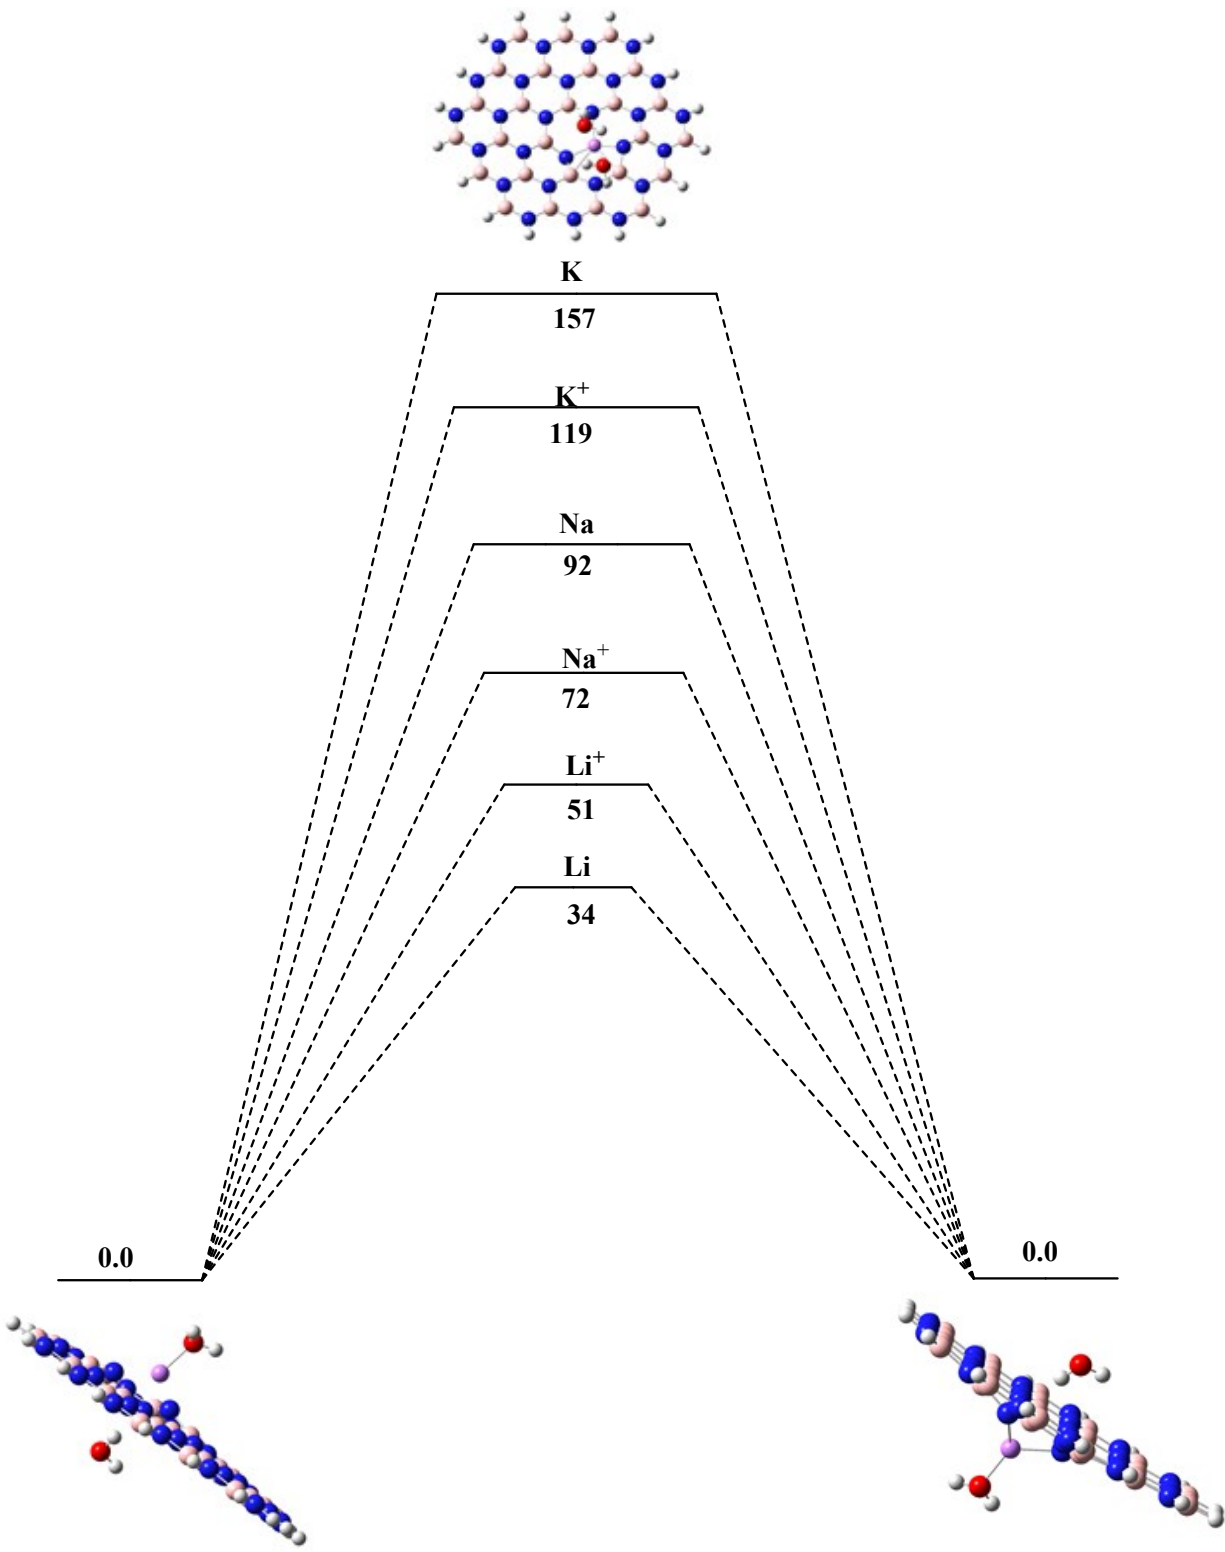

**Figure S3** Energy profile diagram showing energy barriers (kcal mol<sup>-1</sup>) for the permeation of alkali metal atoms/ions across H<sub>2</sub>O-V<sub>B</sub> h-BN-H<sub>2</sub>O.

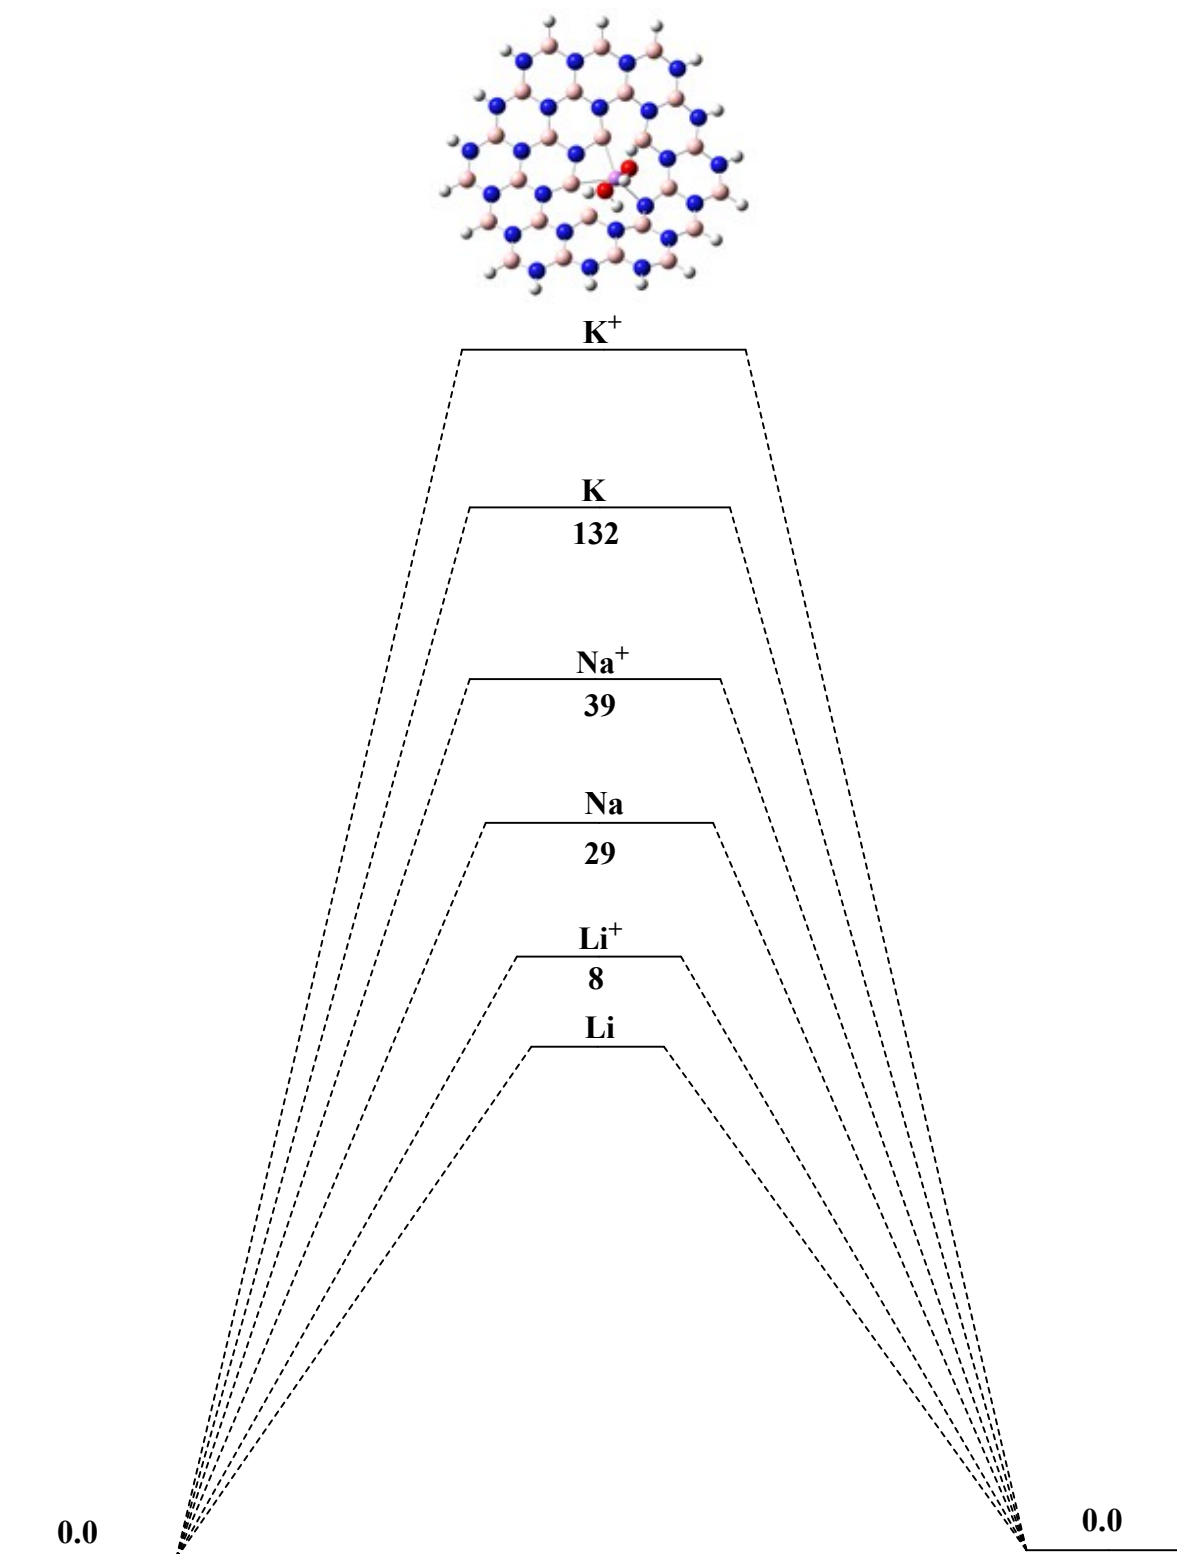

**Figure S4** Energy profile diagram showing energy barriers (kcal mol<sup>-1</sup>) for the permeation of alkali metal atoms/ions across  $\text{H}_2\text{O}-\text{V}_{\text{N}_2\text{B}} h\text{-BN}-\text{H}_2\text{O}$ .

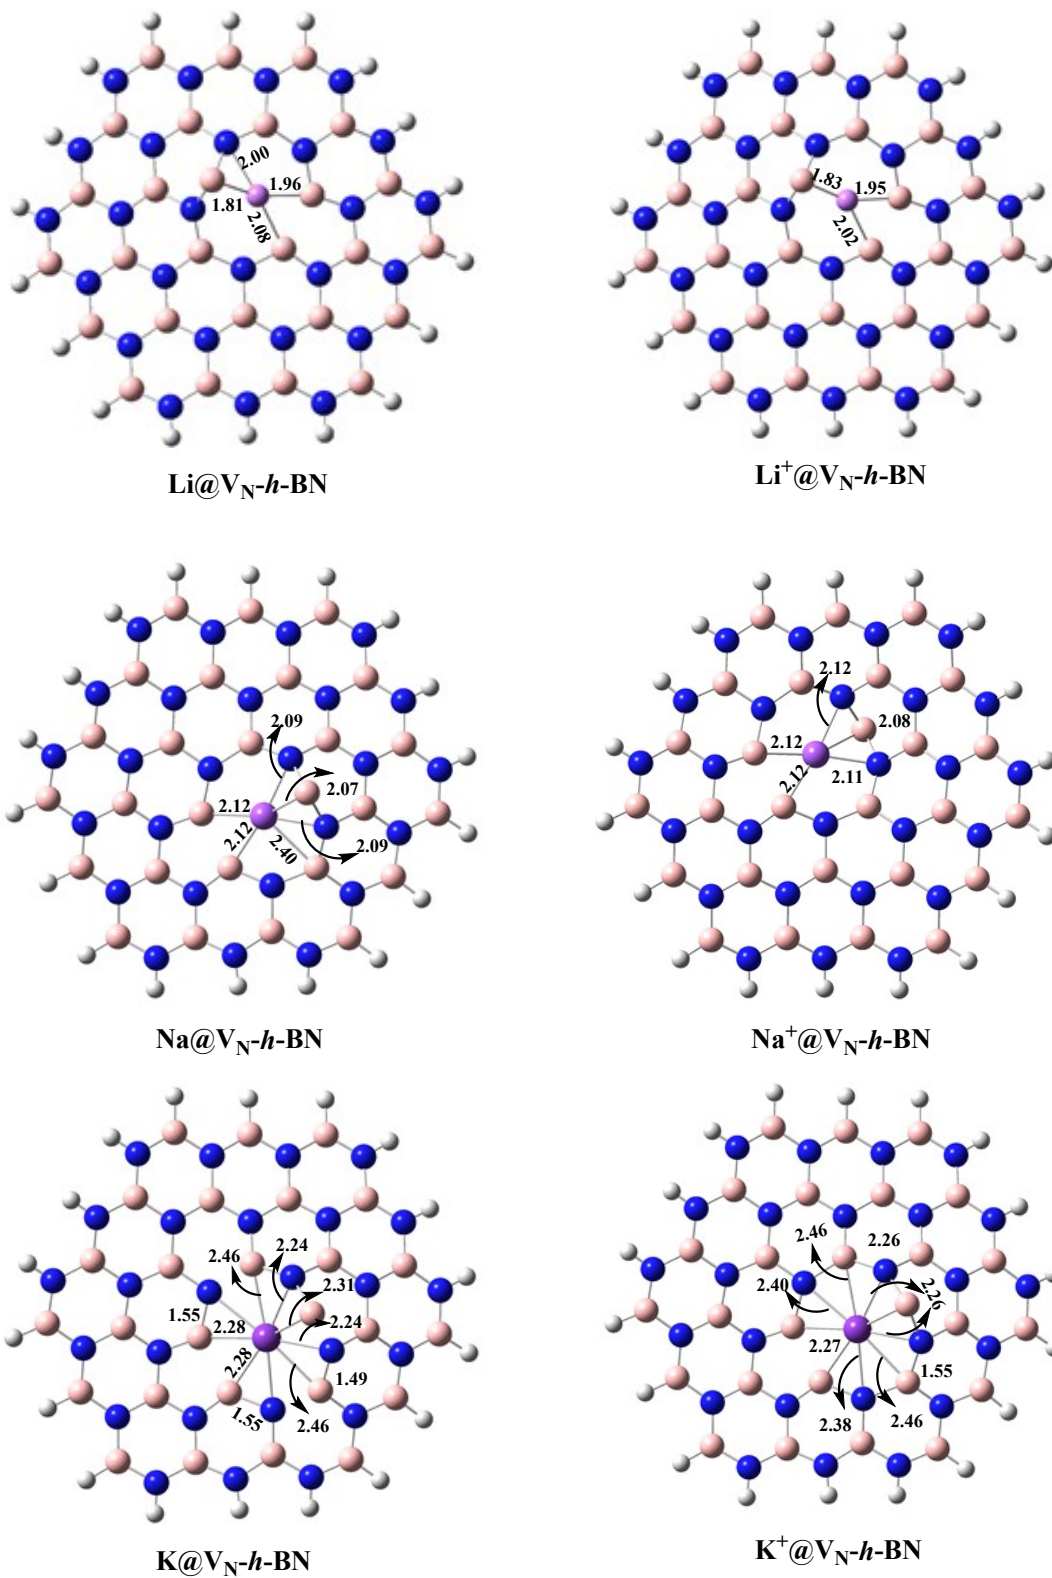

**Figure S5** Optimized geometries (bond lengths, Å) of Transition states of  $V_N$   $h$ -BN with alkali metal atoms/ions

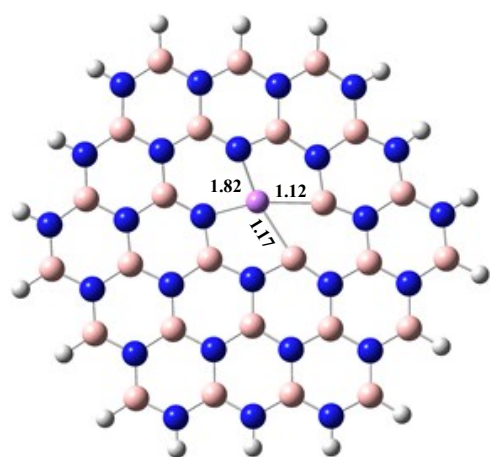

Li@V<sub>BN</sub> *h*-BN

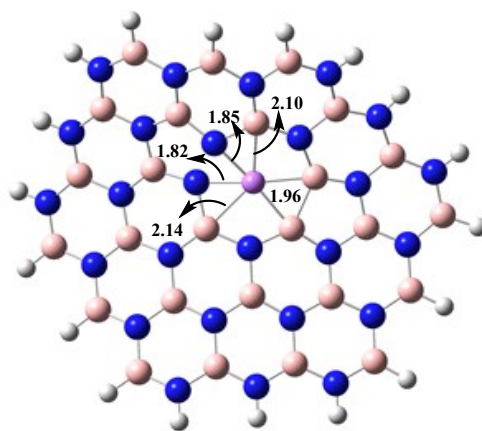

Li<sup>+</sup>@V<sub>BN</sub> *h*-BN

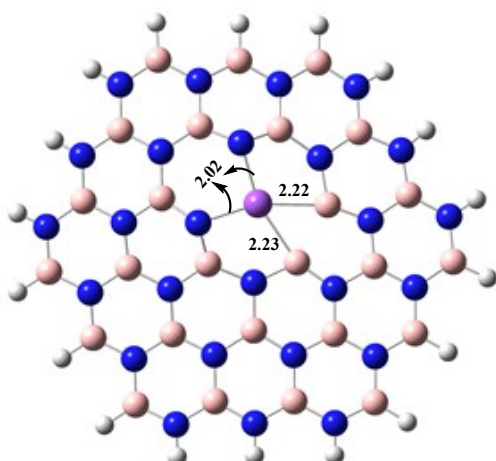

Na@V<sub>BN</sub> *h*-BN

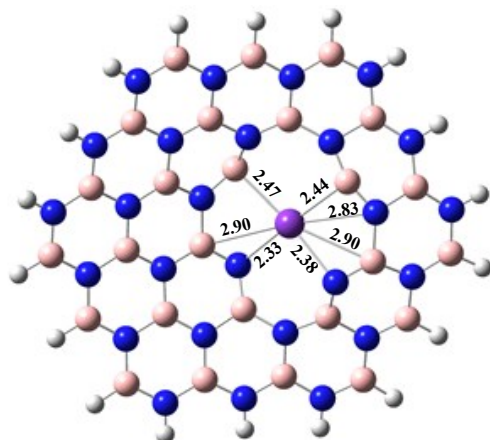

K@V<sub>BN</sub> *h*-BN

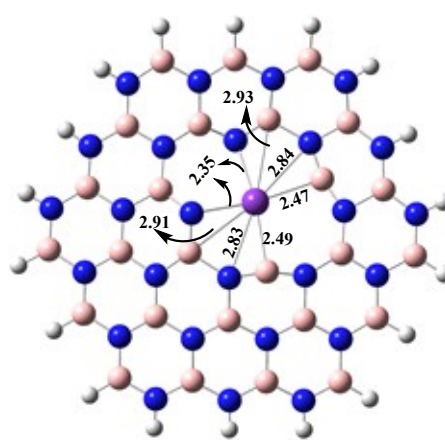

K<sup>+</sup>@V<sub>BN</sub> *h*-BN

**Figure S6** Optimized geometries (bond lengths, Å) of Transition states of V<sub>BN</sub> *h*-BN with alkali metal atoms/ions



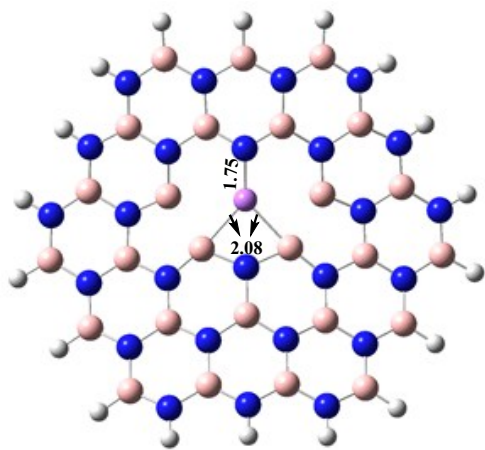

$\text{Li@V}_{\text{N2B}} h\text{-BN}$

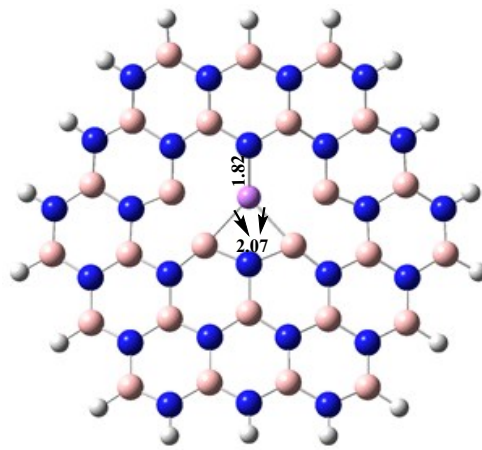

$\text{Li}^+\text{@V}_{\text{N2B}} h\text{-BN}$

2.05

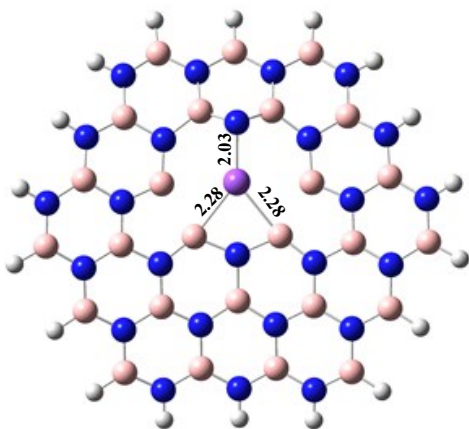

$\text{Na@V}_{\text{N2B}} h\text{-BN}$

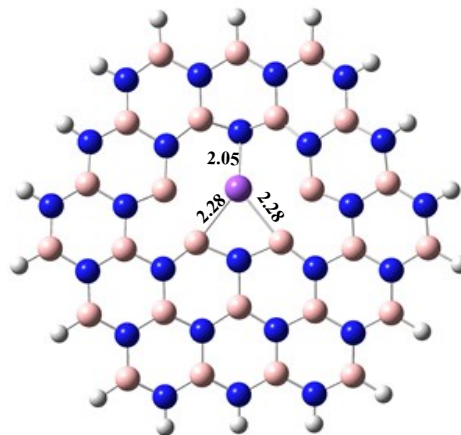

$\text{Na}^+\text{@V}_{\text{N2B}} h\text{-BN}$

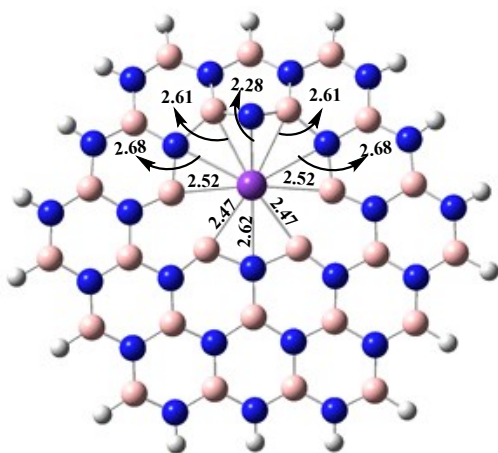

$\text{K@V}_{\text{N2B}} h\text{-BN}$

**Figure S7** Optimized geometries (bond lengths, Å) of Transition states of  $\text{V}_{\text{N2B}} h\text{-BN}$  with alkali metal atoms/ions



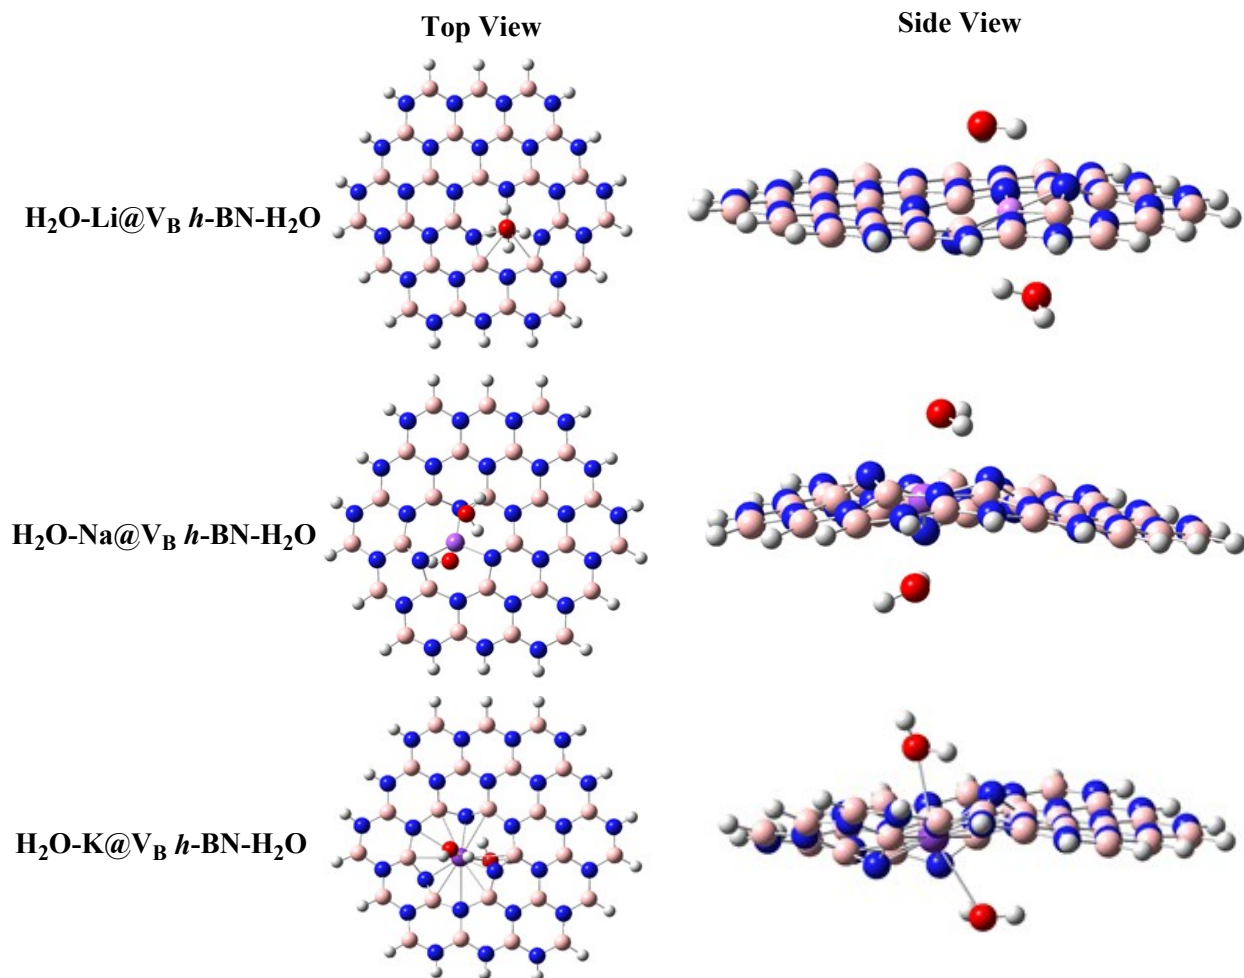

**Figure S8** Optimized geometries of Transition states of  $\text{H}_2\text{O-V}_\text{B} \text{ } h\text{-BN-H}_2\text{O}$  with alkali metal atoms

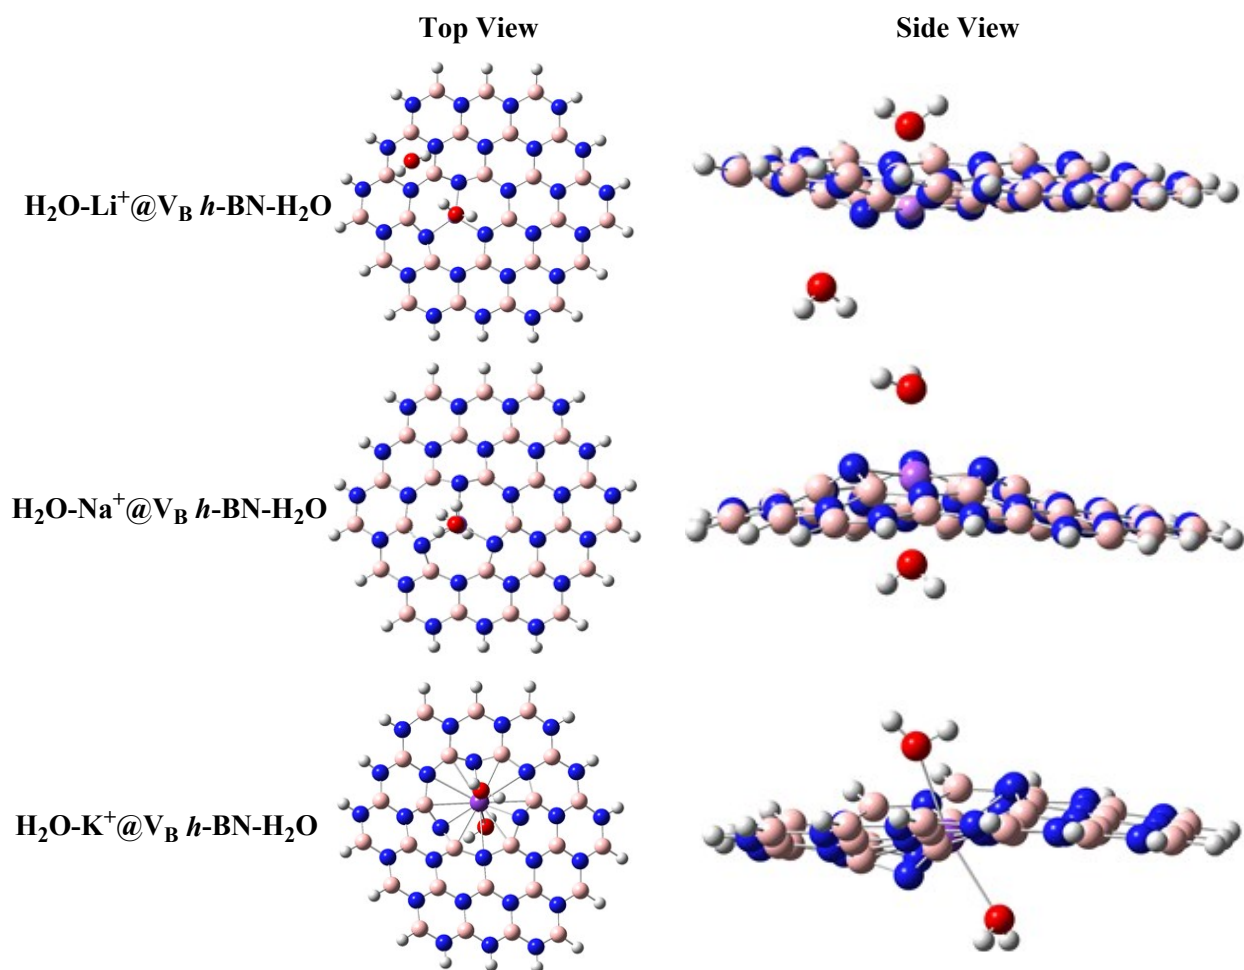

**Figure S9** Optimized geometries of Transition states of  $\text{H}_2\text{O-V}_{\text{B}} h\text{-BN-H}_2\text{O}$  with alkali metal ions

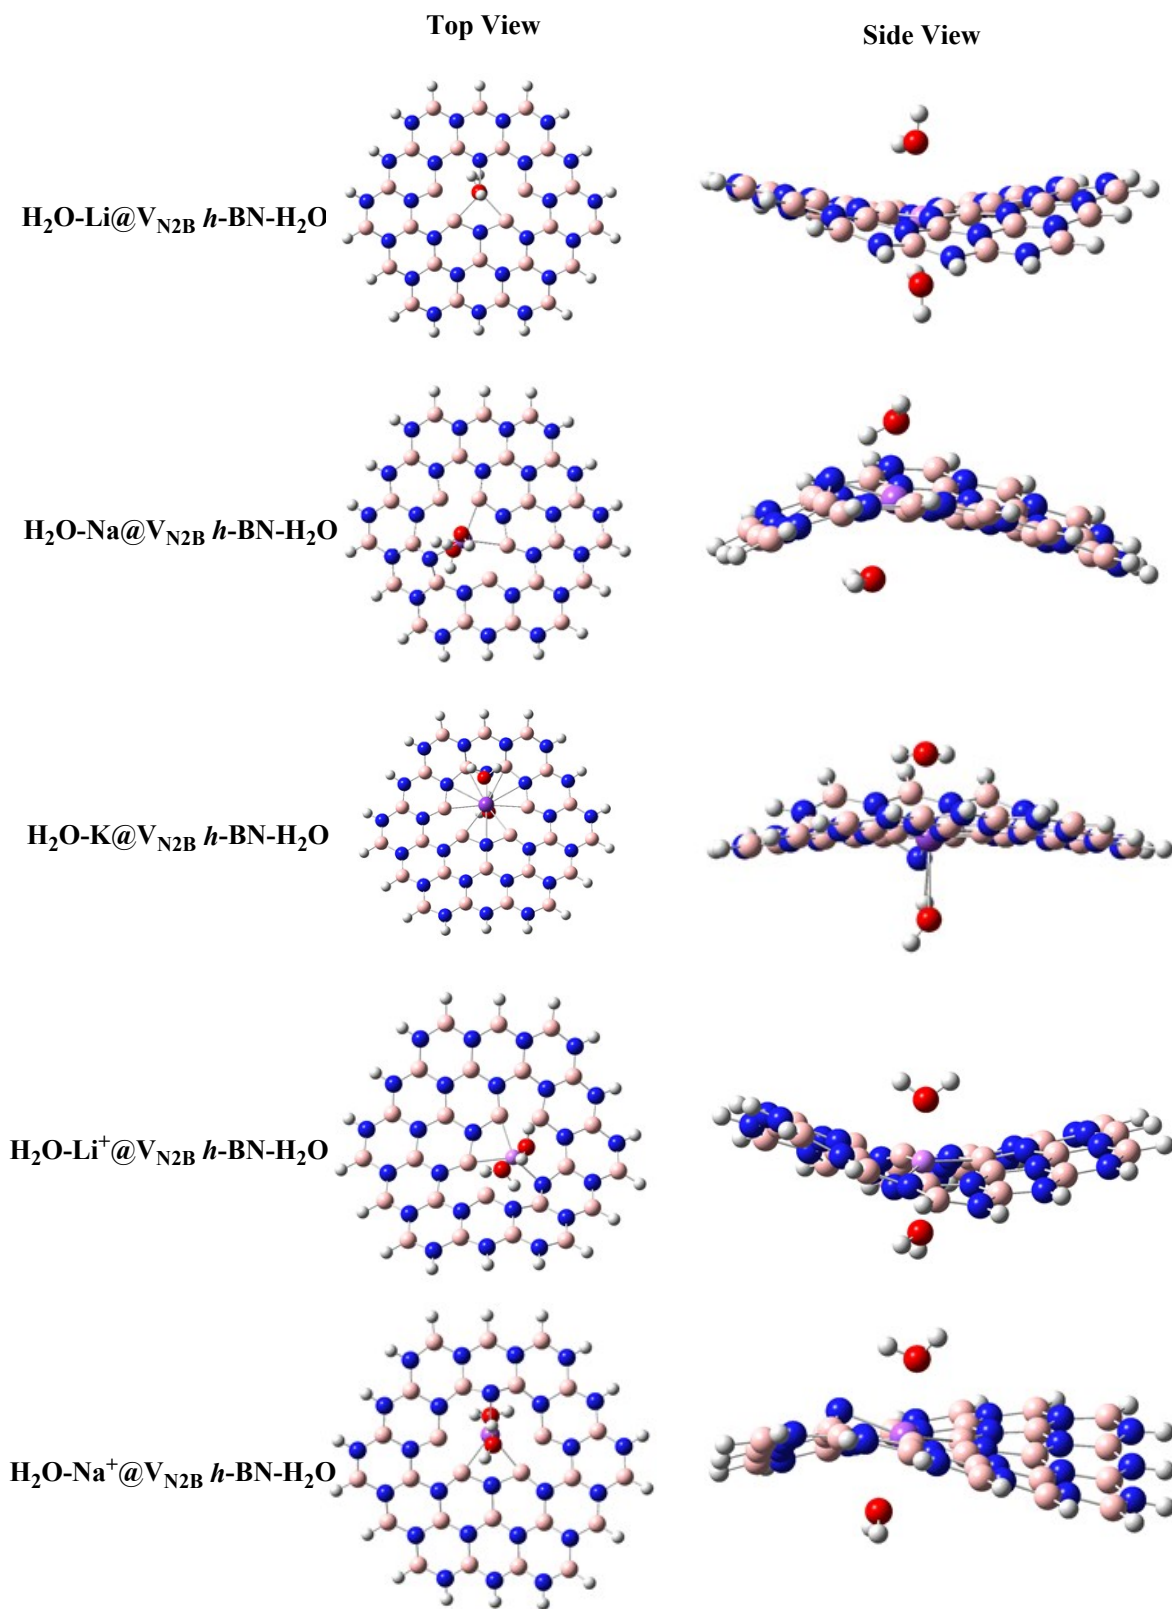

**Figure S10** Optimized geometries of Transition states of  $\text{H}_2\text{O-V}_{\text{N}_2\text{B}} h\text{-BN-H}_2\text{O}$  with alkali metal atoms/ions

Li@V<sub>B</sub> *h*-BN

|    |             |             |             |
|----|-------------|-------------|-------------|
| Li | 0.00009100  | -1.10982100 | 0.47365700  |
| B  | 1.35466300  | 0.69196500  | 0.47186200  |
| B  | -1.35495500 | 0.69154500  | 0.47205200  |
| B  | 2.66930700  | -1.44217400 | 0.36274600  |
| B  | 3.84170900  | 0.71763900  | 0.02385500  |
| B  | 2.53684100  | 2.86729800  | 0.05564900  |
| B  | -0.00048600 | 2.80113600  | 0.19648700  |
| B  | -2.53784100 | 2.86649300  | 0.05587900  |
| B  | -3.84196600 | 0.71639000  | 0.02386100  |
| B  | -2.66884700 | -1.44300100 | 0.36291700  |
| B  | -1.27557900 | -3.58301400 | 0.11933600  |
| B  | 1.27679200  | -3.58259500 | 0.11886500  |
| N  | 0.00049600  | -2.95114800 | 0.04391700  |
| N  | 1.59133800  | -0.67270600 | 0.83066300  |
| N  | 2.56573700  | -2.88738400 | 0.15926400  |
| N  | -2.56474500 | -2.88817700 | 0.15941000  |
| N  | -1.59117900 | -0.67317400 | 0.83096200  |
| N  | -3.89704000 | -0.72684700 | 0.06518100  |
| N  | -2.57607700 | 1.43274100  | 0.16651700  |
| N  | -0.00024400 | 1.34085400  | 0.41526800  |
| N  | -1.25590000 | 3.54210500  | 0.10377600  |
| N  | 1.25468700  | 3.54250000  | 0.10369000  |
| N  | 2.57555900  | 1.43356100  | 0.16635500  |
| N  | 3.89728300  | -0.72558300 | 0.06517600  |
| B  | 3.80162400  | -3.61566000 | -0.08481100 |
| B  | 5.11565500  | -1.45489900 | -0.19076200 |
| B  | 1.24940400  | 4.99664200  | 0.02038800  |

|   |             |             |             |
|---|-------------|-------------|-------------|
| B | -1.25108300 | 4.99622800  | 0.02033200  |
| B | -5.11509200 | -1.45657400 | -0.19117800 |
| B | -3.80035600 | -3.61688300 | -0.08478000 |
| N | -1.26067400 | -5.05786700 | 0.01682700  |
| N | 1.26235100  | -5.05744000 | 0.01583300  |
| N | 5.06977900  | 1.46089100  | -0.21192200 |
| N | 3.78286700  | 3.60440000  | -0.11453900 |
| N | -3.78415200 | 3.60319700  | -0.11403600 |
| N | -5.07025400 | 1.45923300  | -0.21207100 |
| B | 0.00095400  | -5.75745400 | -0.00958100 |
| B | 5.03433000  | 2.90042500  | -0.24985500 |
| B | -5.03534700 | 2.89879300  | -0.24960000 |
| B | -2.50576100 | -5.77814500 | -0.12870500 |
| B | 3.75866000  | 5.04818300  | -0.16509200 |
| N | -3.72746600 | -5.05193500 | -0.18754500 |
| N | 2.50135700  | 5.70019300  | -0.07610000 |
| N | -0.00095400 | 5.68644500  | 0.02586700  |
| N | -5.03918300 | -2.89147400 | -0.21199400 |
| N | -6.31296800 | -0.68537400 | -0.40781000 |
| N | -2.50325400 | 5.69936900  | -0.07632300 |
| B | 2.50765700  | -5.77726300 | -0.12998600 |
| B | 6.31446500  | 0.74146900  | -0.41153200 |
| B | -6.31464500 | 0.73939000  | -0.41199000 |
| B | -3.76040000 | 5.04698200  | -0.16475400 |
| N | 6.31330800  | -0.68329300 | -0.40718100 |
| N | 5.04028700  | -2.88983000 | -0.21132600 |
| N | 3.72918300  | -5.05066900 | -0.18811800 |
| H | -7.33333600 | 1.33584000  | -0.58849300 |

|   |             |             |             |
|---|-------------|-------------|-------------|
| H | -6.04552900 | 3.51380800  | -0.40122900 |
| H | -4.76709300 | 5.67649200  | -0.28082300 |
| H | 0.00113800  | -6.95001700 | -0.05523600 |
| H | -2.51135500 | -6.96903600 | -0.21383800 |
| H | 2.51359300  | -6.96808800 | -0.21602000 |
| H | 7.33297200  | 1.33826900  | -0.58791500 |
| H | 6.04428700  | 3.51577600  | -0.40162400 |
| H | 4.76511800  | 5.67800100  | -0.28154200 |
| H | -4.57878300 | -5.58367900 | -0.30619500 |
| H | -5.88277200 | -3.42048800 | -0.38876200 |
| H | -7.19481900 | -1.15284500 | -0.56632700 |
| H | -2.49390600 | 6.70884700  | -0.12124200 |
| H | -0.00111800 | 6.69533600  | -0.03660800 |
| H | 2.49169500  | 6.70967400  | -0.12090600 |
| H | 7.19539200  | -1.15046200 | -0.56529100 |
| H | 5.88410100  | -3.41854600 | -0.38791700 |
| H | 4.58063800  | -5.58208900 | -0.30722200 |

Li@V<sub>B</sub> *h*-BN (reactant)

|    |             |             |             |
|----|-------------|-------------|-------------|
| Li | -0.00002100 | 1.47686800  | -1.62150900 |
| B  | -1.29370000 | -0.64996500 | -0.32479400 |
| B  | 1.29372400  | -0.64993200 | -0.32480300 |
| B  | -2.62050400 | 1.43459200  | -0.28319500 |
| B  | -3.81788300 | -0.71325700 | -0.03916000 |
| B  | -2.52000900 | -2.84427000 | -0.01339100 |
| B  | 0.00004000  | -2.80638800 | -0.11044000 |
| B  | 2.52008900  | -2.84420400 | -0.01338800 |
| B  | 3.81790500  | -0.71315600 | -0.03916100 |
| B  | 2.62046500  | 1.43465800  | -0.28321000 |

|   |             |             |             |
|---|-------------|-------------|-------------|
| B | 1.28182600  | 3.52043000  | -0.05378600 |
| B | -1.28192600 | 3.52040000  | -0.05378000 |
| N | -0.00004300 | 2.86992600  | -0.16459200 |
| N | -1.45215600 | 0.73645300  | -0.66307400 |
| N | -2.56821200 | 2.87249900  | -0.07947300 |
| N | 2.56812900  | 2.87256400  | -0.07948500 |
| N | 1.45214000  | 0.73648500  | -0.66309500 |
| N | 3.86873700  | 0.72695100  | -0.09112200 |
| N | 2.54101800  | -1.40483900 | -0.09999700 |
| N | 0.00002000  | -1.35213000 | -0.28834700 |
| N | 1.25279500  | -3.54291100 | -0.03423600 |
| N | -1.25269600 | -3.54294400 | -0.03423800 |
| N | -2.54097600 | -1.40490500 | -0.09999600 |
| N | -3.86875600 | 0.72684800  | -0.09111700 |
| B | -3.80516900 | 3.60634500  | 0.09496600  |
| B | -5.10522400 | 1.45179000  | 0.09515400  |
| B | -1.25048100 | -4.99502100 | 0.04361600  |
| B | 1.25061800  | -4.99498800 | 0.04361900  |
| B | 5.10518300  | 1.45192800  | 0.09515200  |
| B | 3.80506600  | 3.60644400  | 0.09495700  |
| N | 1.24787100  | 4.99263700  | 0.06883400  |
| N | -1.24801100 | 4.99260700  | 0.06884000  |
| N | -5.06231500 | -1.45426600 | 0.11542800  |
| N | -3.77362900 | -3.58694600 | 0.09524900  |
| N | 3.77372900  | -3.58684500 | 0.09525600  |
| N | 5.06235700  | -1.45413000 | 0.11543300  |
| B | -0.00007800 | 5.69913800  | 0.13108700  |
| B | -5.03139300 | -2.89097600 | 0.16316100  |



|   |             |             |            |
|---|-------------|-------------|------------|
| B | 5.03147400  | -2.89084100 | 0.16317000 |
| B | 2.48869100  | 5.73321100  | 0.19660400 |
| B | -3.75856700 | -5.03063000 | 0.15080600 |
| N | 3.72512600  | 5.03951400  | 0.21254800 |
| N | -2.50578900 | -5.69490500 | 0.11331700 |
| N | 0.00007800  | -5.68608100 | 0.05240200 |
| N | 5.04777700  | 2.88604400  | 0.13716100 |
| N | 6.31518700  | 0.68307200  | 0.23202500 |
| N | 2.50594500  | -5.69483800 | 0.11332500 |
| B | -2.48885000 | 5.73314700  | 0.19661300 |
| B | -6.31734000 | -0.74067200 | 0.23613500 |
| B | 6.31736100  | -0.74050000 | 0.23614400 |
| B | 3.75870500  | -5.03052900 | 0.15081600 |
| N | -6.31520700 | 0.68290000  | 0.23201900 |
| N | -5.04785900 | 2.88590900  | 0.13716700 |
| N | -3.72526700 | 5.03941700  | 0.21255700 |
| H | 7.34468100  | -1.33830400 | 0.34810200 |
| H | 6.04792100  | -3.50662400 | 0.26325100 |
| H | 4.77422200  | -5.65260400 | 0.22852500 |
| H | -0.00009300 | 6.88554700  | 0.24826800 |
| H | 2.46372600  | 6.92228100  | 0.29871600 |
| H | -2.46391700 | 6.92221800  | 0.29872500 |
| H | -7.34464300 | -1.33850600 | 0.34808800 |
| H | -6.04782300 | -3.50678800 | 0.26323700 |
| H | -4.77406700 | -5.65273100 | 0.22851100 |
| H | 4.56955700  | 5.58347300  | 0.32129200 |
| H | 5.90457000  | 3.40725900  | 0.26443700 |
| H | 7.20252700  | 1.15358300  | 0.34283900 |

|   |             |             |            |
|---|-------------|-------------|------------|
| H | 2.50489400  | -6.70414900 | 0.15966000 |
| H | 0.00009100  | -6.69524400 | 0.10867900 |
| H | -2.50471100 | -6.70421600 | 0.15965200 |
| H | -7.20256000 | 1.15338600  | 0.34283100 |
| H | -5.90466800 | 3.40709700  | 0.26444100 |
| H | -4.56971300 | 5.58335400  | 0.32130100 |

Li@V<sub>B</sub> *h*-BN (product)

|    |             |             |            |
|----|-------------|-------------|------------|
| Li | -0.00006200 | 1.47664600  | 1.62192900 |
| B  | -1.29373200 | -0.64995400 | 0.32488700 |
| B  | 1.29380200  | -0.64986000 | 0.32491600 |
| B  | -2.62064000 | 1.43448400  | 0.28334300 |
| B  | -3.81797600 | -0.71338100 | 0.03960500 |
| B  | -2.51995400 | -2.84428000 | 0.01341700 |
| B  | 0.00011500  | -2.80629300 | 0.11027600 |
| B  | 2.52018800  | -2.84408700 | 0.01340700 |
| B  | 3.81804000  | -0.71308700 | 0.03961000 |
| B  | 2.62052600  | 1.43467500  | 0.28338800 |
| B  | 1.28171500  | 3.52037700  | 0.05355500 |
| B  | -1.28200600 | 3.52028900  | 0.05354000 |
| N  | -0.00012600 | 2.86989000  | 0.16456600 |
| N  | -1.45221600 | 0.73646900  | 0.66320700 |
| N  | -2.56829300 | 2.87239200  | 0.07937500 |
| N  | 2.56805300  | 2.87258100  | 0.07940900 |
| N  | 1.45216900  | 0.73656300  | 0.66327100 |
| N  | 3.86882200  | 0.72705300  | 0.09156400 |
| N  | 2.54110400  | -1.40473200 | 0.10023100 |
| N  | 0.00005900  | -1.35204600 | 0.28831600 |
| N  | 1.25289200  | -3.54279800 | 0.03392100 |

|   |             |             |             |
|---|-------------|-------------|-------------|
| N | -1.25260600 | -3.54289400 | 0.03392600  |
| N | -2.54098200 | -1.40492300 | 0.10022600  |
| N | -3.86887600 | 0.72675500  | 0.09154400  |
| B | -3.80525100 | 3.60619800  | -0.09501200 |
| B | -5.10537500 | 1.45168700  | -0.09468200 |
| B | -1.25034800 | -4.99494700 | -0.04435900 |
| B | 1.25074600  | -4.99485100 | -0.04436900 |
| B | 5.10525800  | 1.45208600  | -0.09467100 |
| B | 3.80495200  | 3.60648700  | -0.09498800 |
| N | 1.24774300  | 4.99256500  | -0.06946000 |
| N | -1.24815000 | 4.99247700  | -0.06946900 |
| N | -5.06237700 | -1.45440700 | -0.11473200 |
| N | -3.77356700 | -3.58700200 | -0.09507500 |
| N | 3.77385800  | -3.58671100 | -0.09510200 |
| N | 5.06250000  | -1.45401200 | -0.11474600 |
| B | -0.00022800 | 5.69901100  | -0.13192700 |
| B | -5.03139600 | -2.89112200 | -0.16257200 |
| B | 5.03163100  | -2.89072900 | -0.16260300 |
| B | 2.48852500  | 5.73316400  | -0.19732500 |
| B | -3.75845000 | -5.03067400 | -0.15102600 |
| N | 3.72501600  | 5.03953400  | -0.21288000 |
| N | -2.50562700 | -5.69488500 | -0.11408100 |
| N | 0.00022500  | -5.68596300 | -0.05354800 |
| N | 5.04775600  | 2.88616500  | -0.13687900 |
| N | 6.31529900  | 0.68321700  | -0.23130200 |
| N | 2.50607900  | -5.69469100 | -0.11410400 |
| B | -2.48898900 | 5.73297900  | -0.19733500 |
| B | -6.31745000 | -0.74083900 | -0.23528300 |

|   |             |             |             |
|---|-------------|-------------|-------------|
| B | 6.31751300  | -0.74034000 | -0.23530300 |
| B | 3.75885100  | -5.03038300 | -0.15106100 |
| N | -6.31535300 | 0.68271800  | -0.23129500 |
| N | -5.04799300 | 2.88577100  | -0.13690000 |
| N | -3.72542700 | 5.03925300  | -0.21289600 |
| H | 7.34485200  | -1.33815600 | -0.34700800 |
| H | 6.04810400  | -3.50649200 | -0.26251100 |
| H | 4.77439100  | -5.65243500 | -0.22863900 |
| H | -0.00027000 | 6.88537000  | -0.24963900 |
| H | 2.46351800  | 6.92220200  | -0.29979700 |
| H | -2.46407600 | 6.92202000  | -0.29980100 |
| H | -7.34474100 | -1.33874100 | -0.34697200 |
| H | -6.04782100 | -3.50696600 | -0.26246200 |
| H | -4.77394300 | -5.65280400 | -0.22858800 |
| H | 4.56944100  | 5.58349200  | -0.32165100 |
| H | 5.90451400  | 3.40743700  | -0.26415000 |
| H | 7.20265100  | 1.15373200  | -0.34201600 |
| H | 2.50502800  | -6.70398900 | -0.16070200 |
| H | 0.00026400  | -6.69511100 | -0.11008100 |
| H | -2.50449800 | -6.70418300 | -0.16067300 |
| H | -7.20274600 | 1.15315800  | -0.34200200 |
| H | -5.90479700 | 3.40696900  | -0.26416600 |
| H | -4.56989400 | 5.58314600  | -0.32166300 |

Li<sup>+</sup>@V<sub>B</sub> *h*-BN

|    |             |             |            |
|----|-------------|-------------|------------|
| Li | 1.32617300  | 0.91351800  | 0.38692100 |
| B  | -1.31264100 | 0.79572800  | 0.38608700 |
| B  | -0.08343600 | -1.48141100 | 0.16938800 |
| B  | 0.09298000  | 2.96210500  | 0.39697400 |

|   |             |             |             |
|---|-------------|-------------|-------------|
| B | -2.40679800 | 3.03782000  | 0.06060900  |
| B | -3.77553300 | 0.90464500  | 0.01395400  |
| B | -2.59415900 | -1.32420100 | 0.09963800  |
| B | -1.44460800 | -3.57566000 | 0.04315100  |
| B | 1.08203300  | -3.69358900 | 0.01436100  |
| B | 2.47418900  | -1.60947800 | 0.09472700  |
| B | 3.94462000  | 0.53521400  | 0.21611900  |
| B | 2.74957700  | 2.83740000  | 0.31145800  |
| N | 2.99628300  | 1.48097900  | 0.71505000  |
| N | -0.24125200 | 1.63280200  | 0.85904600  |
| N | 1.44966400  | 3.51438900  | 0.24727500  |
| N | 3.75843700  | -0.90453600 | 0.07673000  |
| N | 1.23098700  | -0.86288800 | 0.16264300  |
| N | 2.39183400  | -3.04028100 | 0.00775500  |
| N | -0.15160300 | -2.91220200 | 0.08181000  |
| N | -1.28853200 | -0.65624000 | 0.22959000  |
| N | -2.64704400 | -2.76994500 | 0.04221500  |
| N | -3.80832800 | -0.53943900 | 0.03378600  |
| N | -2.49615700 | 1.58378800  | 0.14606500  |
| N | -1.11045800 | 3.71171300  | 0.12735300  |
| B | 1.50556100  | 4.96865900  | -0.03140100 |
| B | -1.02134500 | 5.15242300  | -0.07497500 |
| B | -5.10249500 | -1.20921700 | -0.06549400 |
| B | -3.94685600 | -3.44338300 | -0.02398500 |
| B | 3.60660800  | -3.83640100 | -0.11100100 |
| B | 4.97559100  | -1.70226200 | -0.12407800 |
| N | 5.19823000  | 1.21670500  | -0.09358400 |
| N | 4.02319000  | 3.46778800  | -0.02954700 |

|   |             |             |             |
|---|-------------|-------------|-------------|
| N | -3.60789000 | 3.80686900  | -0.14527000 |
| N | -4.97379700 | 1.69868000  | -0.13871700 |
| N | -1.50252100 | -5.02001800 | -0.01183000 |
| N | 1.00407300  | -5.13081100 | -0.05281400 |
| B | 5.22432000  | 2.66549100  | -0.19840100 |
| B | -4.89295700 | 3.13713200  | -0.21663600 |
| B | -0.28906100 | -5.79318600 | -0.05256500 |
| B | 6.38309100  | 0.39351500  | -0.29804000 |
| B | -6.25962700 | 1.02456100  | -0.22027600 |
| N | 6.23400700  | -1.01832000 | -0.26023000 |
| N | -6.28170000 | -0.39569800 | -0.16651200 |
| N | -5.12907500 | -2.64030200 | -0.06392600 |
| N | 4.85448500  | -3.12886900 | -0.18246500 |
| N | 3.47951600  | -5.26113900 | -0.16612000 |
| N | -3.96593500 | -4.87825300 | -0.05067700 |
| B | 4.03213600  | 4.90768700  | -0.23757600 |
| B | -3.52501100 | 5.25243800  | -0.27969800 |
| B | 2.22117000  | -5.92680700 | -0.13427400 |
| B | -2.79543700 | -5.68346700 | -0.04804800 |
| N | -2.24307700 | 5.87703700  | -0.24772800 |
| N | 0.29234000  | 5.72289700  | -0.11314800 |
| N | 2.79016900  | 5.59079300  | -0.20101000 |
| H | 2.16368400  | -7.11357900 | -0.18031000 |
| H | -0.33830900 | -6.98000300 | -0.09478000 |
| H | -2.86888500 | -6.87049800 | -0.07981800 |
| H | 6.24356800  | 3.20697100  | -0.48000100 |
| H | 7.44017400  | 0.90128900  | -0.49562500 |
| H | 5.05245800  | 5.48068200  | -0.44770400 |

|   |             |             |             |
|---|-------------|-------------|-------------|
| H | -4.50937800 | 5.90404500  | -0.42373400 |
| H | -5.88341800 | 3.78153400  | -0.34639700 |
| H | -7.26657700 | 1.64859400  | -0.33082400 |
| H | 7.07236200  | -1.56708800 | -0.39982600 |
| H | 5.70188500  | -3.67027700 | -0.30093900 |
| H | 4.30587700  | -5.83994100 | -0.23446500 |
| H | -4.85554200 | -5.35799600 | -0.08359300 |
| H | -6.02520700 | -3.10614000 | -0.12203600 |
| H | -7.18582600 | -0.84443200 | -0.22862400 |
| H | -2.21792800 | 6.88125000  | -0.36510600 |
| H | 0.37427200  | 6.71852400  | -0.27507500 |
| H | 2.81776300  | 6.58922100  | -0.36219000 |

Li<sup>+</sup>@V<sub>B</sub> *h*-BN (reactant)

|    |             |             |             |
|----|-------------|-------------|-------------|
| Li | 1.35645500  | 0.62963400  | -1.76903600 |
| B  | -1.23068700 | 0.83795100  | -0.27614500 |
| B  | -0.14031500 | -1.45083700 | -0.23837500 |
| B  | 0.24004200  | 2.91136900  | -0.19707900 |
| B  | -2.26587400 | 3.11244300  | -0.05347100 |
| B  | -3.71338900 | 1.04599500  | -0.04135100 |
| B  | -2.63195000 | -1.22374600 | -0.05578300 |
| B  | -1.56810400 | -3.49951200 | -0.02876800 |
| B  | 0.94654000  | -3.71378800 | -0.03444600 |
| B  | 2.41147300  | -1.66890700 | -0.16179000 |
| B  | 3.88534900  | 0.39892000  | -0.17365800 |
| B  | 2.78697300  | 2.69459300  | -0.16941100 |
| N  | 2.81420300  | 1.29520400  | -0.56537000 |
| N  | -0.00145000 | 1.53627700  | -0.62102500 |
| N  | 1.57224100  | 3.47108600  | -0.05980900 |



|   |             |             |             |
|---|-------------|-------------|-------------|
| N | 3.70232200  | -1.02552500 | -0.04000500 |
| N | 1.19810300  | -0.95695300 | -0.55425600 |
| N | 2.26624900  | -3.09600700 | -0.02956100 |
| N | -0.24705600 | -2.88268200 | -0.11548800 |
| N | -1.30667200 | -0.60161400 | -0.17462300 |
| N | -2.74254800 | -2.66194200 | -0.00990600 |
| N | -3.81270300 | -0.39307200 | -0.01786600 |
| N | -2.39869800 | 1.66594300  | -0.14249700 |
| N | -0.94201000 | 3.72105300  | -0.04246500 |
| B | 1.69319100  | 4.91940300  | 0.17451300  |
| B | -0.81545900 | 5.16266500  | 0.15259300  |
| B | -5.13428600 | -1.01201500 | 0.06444400  |
| B | -4.06311600 | -3.28495900 | 0.06842100  |
| B | 3.45504900  | -3.93048300 | 0.14518000  |
| B | 4.89131600  | -1.86278300 | 0.16375200  |
| N | 5.18449900  | 1.02524100  | -0.01869700 |
| N | 4.10014000  | 3.29368500  | 0.00155500  |
| N | -3.44621200 | 3.93163800  | 0.07158000  |
| N | -4.88890000 | 1.88477300  | 0.04414200  |
| N | -1.67551400 | -4.94017700 | 0.05125500  |
| N | 0.81743500  | -5.14556600 | 0.08048300  |
| B | 5.28621400  | 2.46628400  | 0.05380000  |
| B | -4.75863800 | 3.31811900  | 0.09070000  |
| B | -0.49350300 | -5.75967200 | 0.09706400  |
| B | 6.35869100  | 0.18651700  | 0.17280100  |
| B | -6.20275600 | 1.26633200  | 0.10970800  |
| N | 6.17155200  | -1.21721900 | 0.24973300  |
| N | -6.28318700 | -0.15186800 | 0.10888800  |

|   |             |             |            |
|---|-------------|-------------|------------|
| N | -5.21614500 | -2.43932700 | 0.09761300 |
| N | 4.72682500  | -3.27908700 | 0.23516700 |
| N | 3.27760100  | -5.34799600 | 0.23035100 |
| N | -4.13398600 | -4.71796800 | 0.11260100 |
| B | 4.20568500  | 4.73083200  | 0.20403000 |
| B | -3.31824600 | 5.37242400  | 0.20307400 |
| B | 2.00220600  | -5.97784000 | 0.19575000 |
| B | -2.98980600 | -5.55865300 | 0.11300400 |
| N | -2.01344200 | 5.94069900  | 0.24512800 |
| N | 0.50519200  | 5.70763700  | 0.25136400 |
| N | 3.00790000  | 5.48514700  | 0.28191000 |
| H | 1.90813600  | -7.16131700 | 0.26758300 |
| H | -0.58830800 | -6.94315900 | 0.15776900 |
| H | -3.10005300 | -6.74234900 | 0.16562500 |
| H | 6.34973300  | 2.97287700  | 0.20812500 |
| H | 7.43907100  | 0.67326900  | 0.27248400 |
| H | 5.27046700  | 5.24910700  | 0.31133900 |
| H | -4.28308800 | 6.06342600  | 0.28270800 |
| H | -5.72752800 | 4.00406500  | 0.15608900 |
| H | -7.18566400 | 1.93488200  | 0.16545700 |
| H | 6.99724900  | -1.78553700 | 0.38526000 |
| H | 5.55083700  | -3.85126600 | 0.36636600 |
| H | 4.08686000  | -5.94601600 | 0.33024500 |
| H | -5.03885400 | -5.16676200 | 0.15914800 |
| H | -6.12948900 | -2.86995200 | 0.15569200 |
| H | -7.20578100 | -0.56275100 | 0.15833000 |
| H | -1.94938000 | 6.94381100  | 0.35562500 |
| H | 0.60352300  | 6.70427900  | 0.39562900 |

|                                                        |             |             |             |
|--------------------------------------------------------|-------------|-------------|-------------|
| H                                                      | 3.09972600  | 6.48159800  | 0.42943700  |
| Li <sup>+</sup> @V <sub>B</sub> <i>h</i> -BN (product) |             |             |             |
| Li                                                     | 1.35739600  | 0.62826400  | 1.76899800  |
| B                                                      | -1.23007200 | 0.83884800  | 0.27573900  |
| B                                                      | -0.14148300 | -1.45078100 | 0.23794900  |
| B                                                      | 0.24233700  | 2.91112300  | 0.19684700  |
| B                                                      | -2.26354900 | 3.11412400  | 0.05348000  |
| B                                                      | -3.71262900 | 1.04873900  | 0.04123500  |
| B                                                      | -2.63292600 | -1.22179800 | 0.05543200  |
| B                                                      | -1.57077700 | -3.49835400 | 0.02857900  |
| B                                                      | 0.94371200  | -3.71452400 | 0.03438200  |
| B                                                      | 2.41017400  | -1.67061300 | 0.16176100  |
| B                                                      | 3.88572800  | 0.39611500  | 0.17376200  |
| B                                                      | 2.78902400  | 2.69257000  | 0.16900800  |
| N                                                      | 2.81527600  | 1.29330100  | 0.56523400  |
| N                                                      | -0.00022600 | 1.53615300  | 0.62057500  |
| N                                                      | 1.57487700  | 3.46996700  | 0.05943900  |
| N                                                      | 3.70154700  | -1.02824100 | 0.04018500  |
| N                                                      | 1.19719400  | -0.95784700 | 0.55389500  |
| N                                                      | 2.26386900  | -3.09766300 | 0.02964400  |
| N                                                      | -0.24927300 | -2.88255900 | 0.11524500  |
| N                                                      | -1.30714900 | -0.60065700 | 0.17392500  |
| N                                                      | -2.74459300 | -2.65992800 | 0.00969800  |
| N                                                      | -3.81303900 | -0.39024100 | 0.01771400  |
| N                                                      | -2.39747000 | 1.66770100  | 0.14233400  |
| N                                                      | -0.93921600 | 3.72168100  | 0.04250600  |
| B                                                      | 1.69687700  | 4.91823900  | -0.17458900 |
| B                                                      | -0.81158300 | 5.16324800  | -0.15213500 |

|   |             |             |             |
|---|-------------|-------------|-------------|
| B | -5.13511800 | -1.00817400 | -0.06436500 |
| B | -4.06565400 | -3.28194000 | -0.06845000 |
| B | 3.45204000  | -3.93301600 | -0.14484200 |
| B | 4.88994800  | -1.86645800 | -0.16323700 |
| N | 5.18538400  | 1.02137000  | 0.01884200  |
| N | 4.10265800  | 3.29061900  | -0.00222500 |
| N | -3.44326500 | 3.93422600  | -0.07144300 |
| N | -4.88749600 | 1.88843600  | -0.04409900 |
| N | -1.67922800 | -4.93896100 | -0.05136900 |
| N | 0.81359600  | -5.14620500 | -0.08053000 |
| B | 5.28810400  | 2.46233700  | -0.05426000 |
| B | -4.75614900 | 3.32169100  | -0.09050000 |
| B | -0.49782100 | -5.75932100 | -0.09716300 |
| B | 6.35892200  | 0.18169700  | -0.17245300 |
| B | -6.20182500 | 1.27100600  | -0.10951400 |
| N | 6.17072200  | -1.22190900 | -0.24903600 |
| N | -6.28335200 | -0.14714700 | -0.10861900 |
| N | -5.21803400 | -2.43543000 | -0.09750300 |
| N | 4.72437000  | -3.28262000 | -0.23458700 |
| N | 3.27362800  | -5.35042600 | -0.23003700 |
| N | -4.13755900 | -4.71489600 | -0.11259600 |
| B | 4.20924200  | 4.72770400  | -0.20467200 |
| B | -3.31421400 | 5.37495700  | -0.20251400 |
| B | 1.99777200  | -5.97934100 | -0.19570200 |
| B | -2.99398800 | -5.55643400 | -0.11304700 |
| N | -2.00897900 | 5.94225100  | -0.24429000 |
| N | 0.50944400  | 5.70733800  | -0.25094000 |
| N | 3.01201700  | 5.48295400  | -0.28218500 |

|   |             |             |             |
|---|-------------|-------------|-------------|
| H | 1.90282300  | -7.16274700 | -0.26757200 |
| H | -0.59351700 | -6.94273600 | -0.15792300 |
| H | -3.10517800 | -6.74004500 | -0.16566100 |
| H | 6.35196700  | 2.96806500  | -0.20900400 |
| H | 7.43968600  | 0.66761000  | -0.27214300 |
| H | 5.27440000  | 5.24513500  | -0.31225700 |
| H | -4.27853400 | 6.06669700  | -0.28195600 |
| H | -5.72453500 | 4.00833500  | -0.15585700 |
| H | -7.18425300 | 1.94027500  | -0.16507800 |
| H | 6.99600800  | -1.79086700 | -0.38434200 |
| H | 5.54791400  | -3.85548800 | -0.36569300 |
| H | 4.08249100  | -5.94898700 | -0.32986000 |
| H | -5.04272400 | -5.16309100 | -0.15916000 |
| H | -6.13170200 | -2.86538500 | -0.15550400 |
| H | -7.20627900 | -0.55729700 | -0.15791000 |
| H | -1.94413300 | 6.94534600  | -0.35448000 |
| H | 0.60836200  | 6.70395100  | -0.39498000 |
| H | 3.10462400  | 6.47933300  | -0.42970200 |

Li@V<sub>BN</sub> *h*-BN

|    |             |             |             |
|----|-------------|-------------|-------------|
| Li | -0.31388300 | 1.28674200  | 0.04373300  |
| B  | 1.60331000  | 0.28192900  | -0.00198400 |
| B  | -0.71688700 | -1.08885600 | -0.05626900 |
| B  | 1.53930300  | 2.31817800  | -0.03774000 |
| B  | -0.87169200 | 3.56758200  | 0.12580700  |
| B  | -3.09574200 | 2.41521000  | 0.22316600  |
| B  | -3.00171600 | -0.02892300 | -0.03672600 |
| B  | -2.83793600 | -2.49675500 | -0.11964200 |
| B  | -0.60193700 | -3.61884100 | -0.05307500 |

|   |             |             |             |
|---|-------------|-------------|-------------|
| B | 1.54027500  | -2.25507500 | 0.04762400  |
| B | 3.75523000  | -1.08128300 | 0.07056900  |
| B | 3.76680800  | 1.38501000  | -0.05049200 |
| N | 3.03173900  | 0.15521000  | 0.01173600  |
| N | 2.95019800  | 2.55998300  | -0.09938400 |
| N | 2.99922700  | -2.29568900 | 0.10425500  |
| N | 0.79325500  | -0.95691800 | 0.00401500  |
| N | 0.84654200  | -3.53691500 | 0.02676400  |
| N | -1.37424500 | -2.40606700 | -0.07894200 |
| N | -1.59387500 | 0.01110800  | -0.13023700 |
| N | -3.66278100 | -1.31906500 | -0.08926200 |
| N | -3.79967000 | 1.16832900  | 0.09682600  |
| N | -1.68994200 | 2.44666000  | 0.33422500  |
| N | 0.63343100  | 3.48827300  | -0.02128900 |
| B | 3.59033200  | 3.85002100  | -0.18409400 |
| B | 1.29164300  | 4.82000700  | -0.12875500 |
| B | -5.23767300 | 1.12406400  | 0.07484900  |
| B | -5.11118500 | -1.38429900 | -0.09313600 |
| B | 1.59293000  | -4.79015300 | 0.08277300  |
| B | 3.74342800  | -3.54510000 | 0.16952800  |
| N | 5.21468200  | -1.05434300 | 0.08993200  |
| N | 5.20548400  | 1.43633600  | -0.06229600 |
| N | -1.60186300 | 4.85206000  | 0.09521300  |
| N | -3.82956600 | 3.68089700  | 0.22195600  |
| N | -3.49492400 | -3.79836300 | -0.17597400 |
| N | -1.27359700 | -4.91415500 | -0.09956100 |
| B | 5.93350700  | 0.19247600  | 0.01830400  |
| B | -3.05426000 | 4.88675200  | 0.17198000  |

|   |             |             |             |
|---|-------------|-------------|-------------|
| B | -2.70957400 | -4.99561300 | -0.17344900 |
| B | 5.93694500  | -2.30521800 | 0.17321100  |
| B | -5.27702800 | 3.64666200  | 0.20228700  |
| N | 5.18326000  | -3.50483500 | 0.21948100  |
| N | -5.94198400 | 2.38529600  | 0.15097800  |
| N | -5.87071900 | -0.16453200 | -0.02579400 |
| N | 3.01884400  | -4.76589100 | 0.17431300  |
| N | 0.89358300  | -6.04408300 | 0.04316300  |
| N | -5.71366800 | -2.69199200 | -0.16717300 |
| B | 5.84990400  | 2.73246700  | -0.14990000 |
| B | -0.89380200 | 6.09384500  | -0.01957500 |
| B | -0.51613800 | -6.13957300 | -0.05503100 |
| B | -4.94180800 | -3.88368700 | -0.20954200 |
| N | 0.51738300  | 6.02843500  | -0.12865900 |
| N | 2.71729600  | 4.96350400  | -0.22525800 |
| N | 5.03065900  | 3.89613700  | -0.21662600 |
| H | -1.05449600 | -7.20332500 | -0.09583500 |
| H | -3.23909100 | -6.06280600 | -0.22492200 |
| H | -5.48081600 | -4.94770000 | -0.26707200 |
| H | 7.12536200  | 0.19932900  | 0.02449200  |
| H | 7.12923700  | -2.32766300 | 0.20045700  |
| H | 7.03900900  | 2.82342600  | -0.16636800 |
| H | -1.45723700 | 7.14514900  | -0.02833600 |
| H | -3.60166600 | 5.94738900  | 0.16860600  |
| H | -5.91050200 | 4.65993400  | 0.22514900  |
| H | 5.69094500  | -4.37705500 | 0.27227800  |
| H | 3.51981400  | -5.64253400 | 0.21403300  |
| H | 1.42682300  | -6.90146500 | 0.07825000  |



|   |             |             |             |
|---|-------------|-------------|-------------|
| H | -6.71989500 | -2.78295100 | -0.18272500 |
| H | -6.88002800 | -0.21988300 | -0.03840900 |
| H | -6.95246000 | 2.39488600  | 0.13867200  |
| H | 1.01734300  | 6.90332600  | -0.20602500 |
| H | 3.09062900  | 5.90077900  | -0.28659400 |
| H | 5.49624500  | 4.79113400  | -0.27711900 |

Li@V<sub>BN</sub> *h*-BN (reactant)

|    |             |             |             |
|----|-------------|-------------|-------------|
| Li | -0.49049600 | 1.28025100  | 1.43858700  |
| B  | 1.54392900  | 0.35638400  | 0.12230000  |
| B  | -0.66608000 | -1.07271000 | 0.11787600  |
| B  | 1.41822700  | 2.28710500  | -0.05520900 |
| B  | -0.94986600 | 3.45202500  | -0.14991600 |
| B  | -3.09261100 | 2.33362900  | 0.42469700  |
| B  | -2.94099300 | -0.10626100 | 0.46024600  |
| B  | -2.74564300 | -2.52753600 | -0.03122800 |
| B  | -0.49536000 | -3.56230900 | -0.33203800 |
| B  | 1.59940100  | -2.18346800 | -0.01715300 |
| B  | 3.74369900  | -0.96338100 | 0.32717300  |
| B  | 3.67968900  | 1.49266900  | 0.25506100  |
| N  | 2.97930300  | 0.24523100  | 0.28547400  |
| N  | 2.82858800  | 2.61742700  | 0.02751500  |
| N  | 3.04544600  | -2.19926000 | 0.15027400  |
| N  | 0.81624600  | -0.91823500 | 0.05639800  |
| N  | 0.94868100  | -3.46324500 | -0.25369300 |
| N  | -1.29457900 | -2.38471800 | -0.11244500 |
| N  | -1.52161900 | -0.02153200 | 0.52382000  |
| N  | -3.58066800 | -1.39555000 | 0.27070000  |
| N  | -3.77298200 | 1.07267600  | 0.54624700  |

|   |             |             |             |
|---|-------------|-------------|-------------|
| N | -1.67037700 | 2.40281700  | 0.46667200  |
| N | 0.52601800  | 3.42401500  | -0.30790200 |
| B | 3.43799300  | 3.90579100  | -0.18030300 |
| B | 1.14310200  | 4.72430500  | -0.66459300 |
| B | -5.21021300 | 0.99184200  | 0.52310900  |
| B | -5.02745400 | -1.49964600 | 0.29430000  |
| B | 1.73324300  | -4.68528900 | -0.38119500 |
| B | 3.82534300  | -3.42424200 | 0.10209900  |
| N | 5.19265300  | -0.89632500 | 0.50188600  |
| N | 5.11038300  | 1.59622000  | 0.39694700  |
| N | -1.73487500 | 4.65464700  | -0.50156700 |
| N | -3.87278400 | 3.55002700  | 0.20160500  |
| N | -3.37706400 | -3.82117500 | -0.27062200 |
| N | -1.13506200 | -4.84816200 | -0.59262400 |
| B | 5.86801300  | 0.37740800  | 0.55442300  |
| B | -3.16566200 | 4.70202800  | -0.27754700 |
| B | -2.56951200 | -4.96607200 | -0.57431300 |
| B | 5.94707300  | -2.13042700 | 0.52878700  |
| B | -5.31689100 | 3.49337500  | 0.28505700  |
| N | 5.24664300  | -3.35029200 | 0.33224000  |
| N | -5.94947300 | 2.23348300  | 0.49503400  |
| N | -5.81429800 | -0.31287800 | 0.48824200  |
| N | 3.15000400  | -4.64360300 | -0.18373900 |
| N | 1.06917200  | -5.92129100 | -0.69359600 |
| N | -5.60558700 | -2.80456500 | 0.09087900  |
| B | 5.71156400  | 2.91098900  | 0.28575800  |
| B | -1.09127500 | 5.83349200  | -1.01229000 |
| B | -0.33981600 | -6.03295100 | -0.80427700 |

|   |             |             |             |
|---|-------------|-------------|-------------|
| B | -4.81809600 | -3.95076600 | -0.19835900 |
| N | 0.32234400  | 5.82256700  | -1.09365100 |
| N | 2.55845900  | 4.94543600  | -0.57405800 |
| N | 4.86669500  | 4.02203700  | -0.00260200 |
| H | -0.84968700 | -7.08323600 | -1.05072300 |
| H | -3.08095500 | -6.02030100 | -0.79656100 |
| H | -5.33978000 | -5.00885600 | -0.38354700 |
| H | 7.05054000  | 0.42373800  | 0.70097600  |
| H | 7.12845900  | -2.12602800 | 0.69703600  |
| H | 6.88866200  | 3.05888700  | 0.41450400  |
| H | -1.71276800 | 6.79814600  | -1.33969700 |
| H | -3.76078900 | 5.70703600  | -0.52383900 |
| H | -5.97375800 | 4.48384100  | 0.15941400  |
| H | 5.78616200  | -4.20481700 | 0.32968500  |
| H | 3.67755400  | -5.50305400 | -0.24895200 |
| H | 1.62217100  | -6.75780300 | -0.81686900 |
| H | -6.60931900 | -2.91801800 | 0.11649200  |
| H | -6.82201900 | -0.38959400 | 0.46549300  |
| H | -6.95971400 | 2.21630900  | 0.51078800  |
| H | 0.78189900  | 6.66680100  | -1.40541200 |
| H | 2.91044100  | 5.87040300  | -0.77871600 |
| H | 5.30649900  | 4.92562700  | -0.11018900 |

Li@V<sub>BN</sub> *h*-BN (product)

|    |             |             |             |
|----|-------------|-------------|-------------|
| Li | 0.48873500  | 1.27994200  | 1.43802300  |
| B  | -1.54391200 | 0.35625900  | 0.12258500  |
| B  | 0.66621800  | -1.07275200 | 0.11821500  |
| B  | -1.41823100 | 2.28703700  | -0.05521900 |
| B  | 0.94972300  | 3.45185000  | -0.15010300 |

|   |             |             |             |
|---|-------------|-------------|-------------|
| B | 3.09213200  | 2.33378500  | 0.42554400  |
| B | 2.94098200  | -0.10609700 | 0.46096100  |
| B | 2.74584900  | -2.52728800 | -0.03117300 |
| B | 0.49553900  | -3.56220300 | -0.33226300 |
| B | -1.59923500 | -2.18342200 | -0.01723000 |
| B | -3.74354000 | -0.96348600 | 0.32772300  |
| B | -3.67962400 | 1.49260300  | 0.25590400  |
| N | -2.97918500 | 0.24518700  | 0.28622000  |
| N | -2.82856200 | 2.61731500  | 0.02821400  |
| N | -3.04527100 | -2.19929900 | 0.15036800  |
| N | -0.81610800 | -0.91820500 | 0.05652000  |
| N | -0.94849300 | -3.46313900 | -0.25405400 |
| N | 1.29474600  | -2.38461500 | -0.11250100 |
| N | 1.52163200  | -0.02171800 | 0.52497000  |
| N | 3.58073400  | -1.39535200 | 0.27103300  |
| N | 3.77275700  | 1.07292000  | 0.54684200  |
| N | 1.66991100  | 2.40301000  | 0.46750200  |
| N | -0.52613800 | 3.42370300  | -0.30855500 |
| B | -3.43803200 | 3.90553600  | -0.18035600 |
| B | -1.14330500 | 4.72372400  | -0.66595100 |
| B | 5.21004700  | 0.99221500  | 0.52355600  |
| B | 5.02753000  | -1.49932000 | 0.29434500  |
| B | -1.73304500 | -4.68516800 | -0.38189800 |
| B | -3.82516600 | -3.42428300 | 0.10179700  |
| N | -5.19248600 | -0.89647800 | 0.50260200  |
| N | -5.11029900 | 1.59607400  | 0.39777900  |
| N | 1.73467500  | 4.65438500  | -0.50219300 |
| N | 3.87232500  | 3.55025300  | 0.20243100  |

|   |             |             |             |
|---|-------------|-------------|-------------|
| N | 3.37731400  | -3.82088500 | -0.27081100 |
| N | 1.13535500  | -4.84800500 | -0.59287300 |
| B | -5.86789000 | 0.37722500  | 0.55518900  |
| B | 3.16531800  | 4.70201700  | -0.27740100 |
| B | 2.56981400  | -4.96579500 | -0.57455100 |
| B | -5.94684600 | -2.13061700 | 0.52924000  |
| B | 5.31641500  | 3.49377100  | 0.28578400  |
| N | -5.24641400 | -3.35041200 | 0.33219500  |
| N | 5.94915100  | 2.23391100  | 0.49563800  |
| N | 5.81421500  | -0.31244200 | 0.48833700  |
| N | -3.14984100 | -4.64350200 | -0.18469200 |
| N | -1.06889100 | -5.92108200 | -0.69441100 |
| N | 5.60578800  | -2.80410600 | 0.09059400  |
| B | -5.71151700 | 2.91084100  | 0.28644900  |
| B | 1.09105600  | 5.83277300  | -1.01391600 |
| B | 0.34013700  | -6.03277400 | -0.80469400 |
| B | 4.81835200  | -3.95037300 | -0.19864900 |
| N | -0.32253600 | 5.82161300  | -1.09591400 |
| N | -2.55864900 | 4.94494500  | -0.57514300 |
| N | -4.86671900 | 4.02179300  | -0.00244500 |
| H | 0.85001100  | -7.08306000 | -1.05113600 |
| H | 3.08130800  | -6.02002500 | -0.79670800 |
| H | 5.34015800  | -5.00835100 | -0.38412700 |
| H | -7.05040700 | 0.42353200  | 0.70182800  |
| H | -7.12822400 | -2.12634000 | 0.69755000  |
| H | -6.88860700 | 3.05871800  | 0.41526400  |
| H | 1.71254900  | 6.79734400  | -1.34159400 |
| H | 3.76046100  | 5.70695600  | -0.52398700 |

|   |             |             |             |
|---|-------------|-------------|-------------|
| H | 5.97321300  | 4.48430800  | 0.16038800  |
| H | -5.78599300 | -4.20490000 | 0.32938600  |
| H | -3.67736300 | -5.50295800 | -0.25006200 |
| H | -1.62183000 | -6.75760400 | -0.81789800 |
| H | 6.60953500  | -2.91746300 | 0.11599300  |
| H | 6.82195300  | -0.38896600 | 0.46552500  |
| H | 6.95939700  | 2.21683400  | 0.51139600  |
| H | -0.78203700 | 6.66572800  | -1.40808800 |
| H | -2.91070500 | 5.86972800  | -0.78048200 |
| H | -5.30655400 | 4.92533700  | -0.11031400 |

Li<sup>+</sup>@V<sub>BN</sub> *h*-BN

|    |             |             |             |
|----|-------------|-------------|-------------|
| Li | 0.01279200  | 1.19925700  | -0.02260900 |
| B  | 1.71369200  | 0.25806500  | -0.26920700 |
| B  | -0.75867500 | -0.79962600 | -0.01626500 |
| B  | 1.73138300  | 2.08544700  | -0.32278700 |
| B  | -0.65717600 | 3.13163600  | 0.46664800  |
| B  | -3.03790900 | 2.35749200  | 0.35017900  |
| B  | -3.05673100 | 0.21379600  | -0.38759700 |
| B  | -2.89081200 | -2.19829600 | -0.51338600 |
| B  | -0.78854200 | -3.32632400 | 0.19383100  |
| B  | 1.41913300  | -2.15209500 | 0.27204400  |
| B  | 3.72660200  | -1.24671200 | -0.16532800 |
| B  | 3.86537400  | 1.16109500  | -0.69926300 |
| N  | 3.07802600  | -0.01985000 | -0.48802600 |
| N  | 3.07231200  | 2.35783300  | -0.67418100 |
| N  | 2.86452900  | -2.30579900 | 0.26413100  |
| N  | 0.74183200  | -0.80460200 | 0.04158900  |
| N  | 0.62248700  | -3.32643300 | 0.49669900  |

|   |             |             |             |
|---|-------------|-------------|-------------|
| N | -1.47022500 | -2.06295200 | -0.13473300 |
| N | -1.64315600 | 0.44776300  | -0.08973100 |
| N | -3.66687100 | -1.01459300 | -0.70501000 |
| N | -3.84507800 | 1.35770200  | -0.19832100 |
| N | -1.61857200 | 1.95983400  | 0.39629000  |
| N | 0.79112600  | 3.15166000  | 0.06593300  |
| B | 3.71846900  | 3.64040400  | -0.68368200 |
| B | 1.49179800  | 4.49759000  | 0.11792300  |
| B | -5.28038900 | 1.39856600  | -0.28374200 |
| B | -5.12298900 | -1.03340500 | -0.89944200 |
| B | 1.26918300  | -4.58815600 | 0.89122700  |
| B | 3.51855100  | -3.55555400 | 0.64415800  |
| N | 5.17232800  | -1.30619700 | -0.23438200 |
| N | 5.28555500  | 1.14937400  | -0.79386300 |
| N | -1.27493500 | 4.33833300  | 1.00108100  |
| N | -3.61770300 | 3.57865800  | 0.79253200  |
| N | -3.55325200 | -3.46997900 | -0.65802600 |
| N | -1.52417400 | -4.57632200 | 0.21303900  |
| B | 5.95186300  | -0.13009900 | -0.57931700 |
| B | -2.69814100 | 4.56892700  | 1.23225700  |
| B | -2.87720300 | -4.67112200 | -0.26402200 |
| B | 5.80056800  | -2.56016200 | 0.14739600  |
| B | -5.07490200 | 3.71099000  | 0.69983700  |
| N | 4.95478500  | -3.62157800 | 0.57862700  |
| N | -5.85973300 | 2.64305400  | 0.15773400  |
| N | -5.89023800 | 0.18380600  | -0.74022000 |
| N | 2.68833400  | -4.63881200 | 1.04297100  |
| N | 0.45575800  | -5.74923500 | 1.08247400  |

|   |             |             |             |
|---|-------------|-------------|-------------|
| N | -5.69527200 | -2.31573700 | -1.17867600 |
| B | 5.93650900  | 2.44640600  | -0.95316400 |
| B | -0.49831000 | 5.55182300  | 1.20647700  |
| B | -0.90521600 | -5.79552400 | 0.69997300  |
| B | -4.95429300 | -3.52557800 | -1.04795600 |
| N | 0.81878000  | 5.60063600  | 0.71616800  |
| N | 2.83087200  | 4.70927600  | -0.36023900 |
| N | 5.13659700  | 3.64178500  | -0.91859900 |
| H | -1.52817200 | -6.80613300 | 0.76980600  |
| H | -3.42882900 | -5.72221300 | -0.31434000 |
| H | -5.48255100 | -4.57675500 | -1.22484300 |
| H | 7.13664800  | -0.20013200 | -0.65027700 |
| H | 6.98236400  | -2.69327900 | 0.11106100  |
| H | 7.11653400  | 2.52203200  | -1.08238500 |
| H | -0.97741800 | 6.49286400  | 1.74697800  |
| H | -3.06471500 | 5.58194300  | 1.72700400  |
| H | -5.59473500 | 4.71350700  | 1.07414100  |
| H | 5.40877900  | -4.48699200 | 0.83951700  |
| H | 3.11211200  | -5.51845900 | 1.30596700  |
| H | 0.88645500  | -6.60931800 | 1.39333000  |
| H | -6.68095400 | -2.39861000 | -1.38829400 |
| H | -6.89586000 | 0.12450700  | -0.83325000 |
| H | -6.86078800 | 2.78541600  | 0.13234200  |
| H | 1.32391700  | 6.46895000  | 0.83180700  |
| H | 3.18158400  | 5.65645500  | -0.29747300 |
| H | 5.63930000  | 4.51715400  | -0.98406400 |



Li<sup>+</sup>@V<sub>BN</sub> *h*-BN (reactant)

|    |             |             |             |
|----|-------------|-------------|-------------|
| Li | 0.45350300  | -1.72965900 | -1.53823600 |
| B  | -1.61338000 | -0.24201000 | -0.08025700 |
| B  | 0.73306500  | 0.75047300  | -0.08466200 |
| B  | -1.66991200 | -1.97840800 | -0.42112800 |
| B  | 0.47922300  | -3.06918500 | 0.43882900  |
| B  | 2.79523200  | -2.32458500 | 0.68260600  |
| B  | 2.95080100  | -0.36866500 | -0.44074300 |
| B  | 2.89444000  | 2.02770200  | -0.76252300 |
| B  | 0.88036500  | 3.28839900  | -0.02877800 |
| B  | -1.31292000 | 2.18878100  | 0.41104500  |
| B  | -3.62890700 | 1.28397200  | 0.26699200  |
| B  | -3.82161500 | -1.04452300 | -0.51103700 |
| N  | -3.01280600 | 0.05591000  | -0.09831300 |
| N  | -3.02933000 | -2.20946900 | -0.78427000 |
| N  | -2.74098800 | 2.35801100  | 0.58929000  |
| N  | -0.69388800 | 0.84762500  | 0.15400700  |
| N  | -0.48236400 | 3.36268000  | 0.43488300  |
| N  | 1.49499300  | 1.97837300  | -0.31946400 |
| N  | 1.48475600  | -0.56829200 | -0.28472400 |
| N  | 3.62396400  | 0.79560900  | -0.85637000 |
| N  | 3.68944500  | -1.46009100 | 0.04073900  |
| N  | 1.39787000  | -1.91676500 | 0.44450100  |
| N  | -0.78969400 | -3.13132800 | -0.30827700 |
| B  | -3.66909800 | -3.45806600 | -1.08253900 |
| B  | -1.46614400 | -4.46578700 | -0.49457900 |
| B  | 5.12227600  | -1.50915800 | 0.16603900  |
| B  | 5.09413800  | 0.76909700  | -0.89233000 |

|   |             |             |             |
|---|-------------|-------------|-------------|
| B | -1.07123600 | 4.66199400  | 0.78323300  |
| B | -3.33971300 | 3.63742100  | 0.93857000  |
| N | -5.07816000 | 1.36992900  | 0.26075600  |
| N | -5.24493900 | -1.00389700 | -0.58130100 |
| N | 0.96662300  | -4.27107700 | 1.11388700  |
| N | 3.27209100  | -3.45077200 | 1.41134900  |
| N | 3.60185100  | 3.25459700  | -1.02891700 |
| N | 1.63886800  | 4.51478500  | -0.20599400 |
| B | -5.88635400 | 0.24132400  | -0.16804300 |
| B | 2.28237100  | -4.43151600 | 1.72539900  |
| B | 2.96578800  | 4.51441000  | -0.75669200 |
| B | -5.65855300 | 2.63366000  | 0.68591700  |
| B | 4.72450100  | -3.58523100 | 1.55388000  |
| N | -4.77614100 | 3.70091200  | 1.03091300  |
| N | 5.60097000  | -2.63336800 | 0.93240500  |
| N | 5.81073900  | -0.40878100 | -0.44440400 |
| N | -2.45907600 | 4.74401000  | 1.12493600  |
| N | -0.23291800 | 5.82261300  | 0.72898700  |
| N | 5.72408100  | 1.98675400  | -1.30540100 |
| B | -5.89751000 | -2.23964600 | -0.99674100 |
| B | 0.28319400  | -5.54051000 | 0.92870000  |
| B | 1.07871600  | 5.79337300  | 0.19761000  |
| B | 5.01380500  | 3.22198000  | -1.37702900 |
| N | -0.80241600 | -5.61819200 | 0.02209200  |
| N | -2.77399000 | -4.58010900 | -1.07739100 |
| N | -5.09708400 | -3.41128000 | -1.25581100 |
| H | 1.71392200  | 6.79298900  | 0.08333500  |
| H | 3.54089700  | 5.53520700  | -0.95591700 |

|   |             |             |             |
|---|-------------|-------------|-------------|
| H | 5.58241500  | 4.22497000  | -1.67065400 |
| H | -7.07286000 | 0.32791000  | -0.18093700 |
| H | -6.83895400 | 2.77979500  | 0.73914300  |
| H | -7.08099900 | -2.29638000 | -1.10924300 |
| H | 0.65771500  | -6.51393200 | 1.49730200  |
| H | 2.53301000  | -5.38994400 | 2.37796300  |
| H | 5.17159800  | -4.49733800 | 2.17330700  |
| H | -5.20770100 | 4.57498900  | 1.30063400  |
| H | -2.84367300 | 5.65136900  | 1.35195400  |
| H | -0.61347600 | 6.72264800  | 0.98788900  |
| H | 6.72431900  | 2.02143400  | -1.44927000 |
| H | 6.82110600  | -0.36237500 | -0.41766200 |
| H | 6.59188600  | -2.77235100 | 1.08079900  |
| H | -1.25194400 | -6.51940700 | -0.07295000 |
| H | -3.14155900 | -5.51610700 | -1.19348200 |
| H | -5.60628400 | -4.24969000 | -1.50295300 |

Li<sup>+</sup>@V<sub>BN</sub> *h*-BN (product)

|    |             |             |             |
|----|-------------|-------------|-------------|
| Li | 0.26711800  | -0.74895400 | 1.66442000  |
| B  | -1.59355900 | -0.44213000 | 0.12858700  |
| B  | 0.65004800  | 0.79799000  | -0.11206300 |
| B  | -1.44213200 | -2.13674900 | -0.35672800 |
| B  | 0.88291000  | -3.06680300 | 0.03253600  |
| B  | 2.97257500  | -2.05112700 | 0.93511000  |
| B  | 2.98944300  | 0.01643400  | 0.02322100  |
| B  | 2.67768600  | 2.27946600  | -0.75209600 |
| B  | 0.46409100  | 3.32289500  | -0.39627100 |
| B  | -1.53230100 | 2.05197900  | 0.42743300  |
| B  | -3.72236900 | 0.87640300  | 0.62282700  |

|   |             |             |             |
|---|-------------|-------------|-------------|
| B | -3.70776700 | -1.47273800 | -0.12893700 |
| N | -2.99871000 | -0.30831200 | 0.31537700  |
| N | -2.81478100 | -2.49854200 | -0.56350800 |
| N | -2.94125200 | 2.07188900  | 0.75839000  |
| N | -0.76845800 | 0.75095100  | 0.28242900  |
| N | -0.87237700 | 3.29880700  | 0.15669700  |
| N | 1.24622900  | 2.08199700  | -0.47875500 |
| N | 1.57465500  | -0.36295300 | -0.00984300 |
| N | 3.56755400  | 1.20592900  | -0.44743900 |
| N | 3.78442600  | -0.94947000 | 0.65524900  |
| N | 1.54624200  | -1.79820800 | 0.54824500  |
| N | -0.44703200 | -3.16420200 | -0.52806800 |
| B | -3.33387100 | -3.73546700 | -1.07026500 |
| B | -0.94852400 | -4.47842800 | -1.03353000 |
| B | 5.22039500  | -0.90065700 | 0.74295700  |
| B | 5.02398000  | 1.34242000  | -0.39960400 |
| B | -1.61065800 | 4.55918200  | 0.32794000  |
| B | -3.67381000 | 3.31545100  | 0.96771300  |
| N | -5.16875900 | 0.81275300  | 0.69184100  |
| N | -5.13033700 | -1.56404100 | -0.15714200 |
| N | 1.61719100  | -4.30694400 | 0.29371600  |
| N | 3.56834400  | -3.26019000 | 1.39428400  |
| N | 3.24448200  | 3.52231700  | -1.20552300 |
| N | 1.04036200  | 4.58240800  | -0.83348100 |
| B | -5.87537400 | -0.40048500 | 0.30510400  |
| B | 2.85510100  | -4.44750700 | 1.04245100  |
| B | 2.39847800  | 4.67901000  | -1.30718800 |
| B | -5.86303600 | 2.03807500  | 1.05043300  |

|   |             |             |             |
|---|-------------|-------------|-------------|
| B | 5.01567100  | -3.24230500 | 1.65100200  |
| N | -5.08905100 | 3.22641700  | 1.21542100  |
| N | 5.79514800  | -2.07740400 | 1.34736500  |
| N | 5.82075800  | 0.27952500  | 0.18573200  |
| N | -2.94261000 | 4.53383000  | 0.85163900  |
| N | -0.97670000 | 5.77889100  | -0.07078000 |
| N | 5.53576000  | 2.56837800  | -0.93661900 |
| B | -5.67345200 | -2.81102000 | -0.68996700 |
| B | 1.17222800  | -5.55310600 | -0.32368200 |
| B | 0.29837100  | 5.82187200  | -0.68685800 |
| B | 4.68818100  | 3.64224900  | -1.35168900 |
| N | -0.02068600 | -5.56628200 | -1.07490300 |
| N | -2.32199400 | -4.69093600 | -1.40083600 |
| N | -4.77128000 | -3.83891800 | -1.13569600 |
| H | 0.76061300  | 6.85243600  | -1.06001300 |
| H | 2.82464500  | 5.70914200  | -1.71861200 |
| H | 5.16256500  | 4.64758500  | -1.77631000 |
| H | -7.06394600 | -0.43082400 | 0.34473000  |
| H | -7.04550500 | 2.05939000  | 1.18466800  |
| H | -6.84982500 | -2.97934200 | -0.75933500 |
| H | 1.81876800  | -6.54226100 | -0.19959300 |
| H | 3.29250300  | -5.52274600 | 1.28862300  |
| H | 5.54395500  | -4.22251900 | 2.07001900  |
| H | -5.60134900 | 4.07515400  | 1.41616100  |
| H | -3.43042600 | 5.41344900  | 0.95806600  |
| H | -1.47774400 | 6.65146400  | 0.02734500  |
| H | 6.53315600  | 2.72339200  | -0.99762500 |
| H | 6.82626900  | 0.39073900  | 0.20044500  |

|   |             |             |             |
|---|-------------|-------------|-------------|
| H | 6.79206400  | -2.15026200 | 1.50259000  |
| H | -0.31339400 | -6.45285300 | -1.46316200 |
| H | -2.57440900 | -5.61118300 | -1.73693100 |
| H | -5.20068800 | -4.68225400 | -1.49304000 |

Li@V<sub>N2B</sub> *h*-BN

|    |             |             |             |
|----|-------------|-------------|-------------|
| Li | -0.00003000 | 1.11721400  | 0.11584500  |
| B  | -1.39281400 | -0.41558400 | -0.08646600 |
| B  | 1.39284600  | -0.41550400 | -0.08646200 |
| B  | 0.00006900  | -2.53456800 | 0.29841300  |
| B  | 2.47645700  | -2.73062700 | 0.02004900  |
| B  | 3.75319900  | -0.69905100 | -0.54254900 |
| B  | 2.42878700  | 1.27002000  | -0.14174300 |
| B  | 1.19411800  | 3.43762600  | 0.58102500  |
| B  | -1.19429200 | 3.43754000  | 0.58120400  |
| B  | -2.42886900 | 1.26988800  | -0.14157400 |
| B  | -3.75314000 | -0.69923200 | -0.54265100 |
| B  | -2.47627900 | -2.73078200 | 0.01975700  |
| N  | -2.48556600 | -1.32589900 | -0.24342200 |
| N  | 0.00003200  | -1.01596600 | 0.07269200  |
| N  | -1.22486800 | -3.31525500 | 0.39843100  |
| N  | -3.70751800 | 0.71844600  | -0.54601800 |
| N  | -2.41730200 | 2.68509700  | 0.15398600  |
| N  | -0.00005300 | 2.74983200  | 0.73720200  |
| N  | 2.41713400  | 2.68525500  | 0.15369200  |
| N  | 3.70746800  | 0.71862300  | -0.54614600 |
| N  | 2.48566500  | -1.32576700 | -0.24325800 |
| N  | 1.22504800  | -3.31516500 | 0.39862500  |
| B  | -1.23394300 | -4.72914800 | 0.76026700  |

|   |             |             |             |
|---|-------------|-------------|-------------|
| B | 1.23417500  | -4.72904900 | 0.76049400  |
| B | 4.93386800  | 1.46073600  | -0.71791700 |
| B | 3.65003600  | 3.46936800  | -0.01391400 |
| B | -3.65027600 | 3.46913300  | -0.01345900 |
| B | -4.93397500 | 1.46049100  | -0.71768300 |
| N | -4.96414300 | -1.44970100 | -0.75609900 |
| N | -3.71163300 | -3.49602900 | -0.08195000 |
| N | 3.71187500  | -3.49579200 | -0.08148200 |
| N | 4.96426400  | -1.44946100 | -0.75584800 |
| N | 1.25126800  | 4.90352600  | 0.74172700  |
| N | -1.25152900 | 4.90343100  | 0.74195500  |
| B | -4.93875700 | -2.86777800 | -0.51713000 |
| B | 4.93897700  | -2.86750500 | -0.51667000 |
| B | -0.00014400 | 5.60412700  | 0.89470800  |
| B | -6.17676500 | -0.70877500 | -1.06432100 |
| B | 6.17683400  | -0.70849100 | -1.06417100 |
| N | -6.12430600 | 0.71214400  | -1.06292100 |
| N | 6.12426300  | 0.71242500  | -1.06301800 |
| N | 4.86560300  | 2.85740500  | -0.48922100 |
| N | -4.86582100 | 2.85712900  | -0.48876700 |
| N | -3.65387800 | 4.87191400  | 0.29983800  |
| N | 3.65355200  | 4.87218100  | 0.29924000  |
| B | -3.70825100 | -4.88468000 | 0.31433900  |
| B | 3.70855700  | -4.88441000 | 0.31492500  |
| B | -2.49027800 | 5.61484600  | 0.65339600  |
| B | 2.48994500  | 5.61503600  | 0.65293300  |
| N | 2.48387900  | -5.44181000 | 0.76809000  |
| N | 0.00011500  | -5.37438800 | 1.05974400  |

|   |             |             |             |
|---|-------------|-------------|-------------|
| N | -2.48358700 | -5.44201500 | 0.76762100  |
| H | -2.56381500 | 6.79225200  | 0.84685300  |
| H | -0.00017000 | 6.78295200  | 1.09500600  |
| H | 2.56341600  | 6.79245800  | 0.84631700  |
| H | -5.92750600 | -3.52007600 | -0.64986500 |
| H | -7.19720800 | -1.28369800 | -1.29258700 |
| H | -4.70082500 | -5.54401700 | 0.26916100  |
| H | 4.70118800  | -5.54367200 | 0.26992100  |
| H | 5.92778400  | -3.51974400 | -0.64925700 |
| H | 7.19732700  | -1.28337200 | -1.29231800 |
| H | -6.98696900 | 1.20930600  | -1.23695000 |
| H | -5.69018000 | 3.43419100  | -0.58361000 |
| H | -4.52308700 | 5.37993600  | 0.21274300  |
| H | 4.52271000  | 5.38026700  | 0.21200300  |
| H | 5.68991800  | 3.43451600  | -0.58414900 |
| H | 6.98689000  | 1.20962400  | -1.23711600 |
| H | 2.48287100  | -6.41700100 | 1.03326800  |
| H | 0.00013300  | -6.35761200 | 1.29345100  |
| H | -2.48253900 | -6.41722100 | 1.03274200  |

Li@V<sub>N2B</sub> *h*-BN (reactant)

|    |             |             |             |
|----|-------------|-------------|-------------|
| Li | -0.00001900 | 1.28308000  | 0.79916800  |
| B  | 1.38743200  | -0.36693000 | 0.14786700  |
| B  | -1.38740300 | -0.36699300 | 0.14785300  |
| B  | 0.00006800  | -2.47937400 | -0.28909100 |
| B  | -2.47522600 | -2.69092100 | -0.03122700 |
| B  | -3.75777900 | -0.69392400 | 0.60480200  |
| B  | -2.44270400 | 1.26410100  | 0.25405000  |
| B  | -1.19668700 | 3.37687800  | -0.45306700 |



|   |             |             |             |
|---|-------------|-------------|-------------|
| B | 1.19650600  | 3.37690700  | -0.45325200 |
| B | 2.44265700  | 1.26421300  | 0.25387400  |
| B | 3.75780300  | -0.69372400 | 0.60490700  |
| B | 2.47533800  | -2.69084200 | -0.03091000 |
| N | 2.48479400  | -1.29545500 | 0.27453600  |
| N | 0.00002900  | -0.96890300 | -0.00764100 |
| N | 1.22337300  | -3.26058300 | -0.42576400 |
| N | 3.72473800  | 0.72213300  | 0.65300300  |
| N | 2.44318100  | 2.66551000  | -0.06859800 |
| N | -0.00007200 | 2.69153000  | -0.31771200 |
| N | -2.44329400 | 2.66543000  | -0.06828500 |
| N | -3.72475600 | 0.72192600  | 0.65314100  |
| N | -2.48474500 | -1.29556600 | 0.27436400  |
| N | -1.22320100 | -3.26060400 | -0.42597600 |
| B | 1.23265700  | -4.65695500 | -0.84740400 |
| B | -1.23239200 | -4.65696400 | -0.84765900 |
| B | -4.95664300 | 1.46154800  | 0.77951800  |
| B | -3.68084700 | 3.44649900  | 0.00222000  |
| B | 3.68071400  | 3.44662400  | 0.00173700  |
| B | 4.95660400  | 1.46181300  | 0.77925200  |
| N | 4.96881900  | -1.45090000 | 0.79431900  |
| N | 3.70939100  | -3.46507200 | 0.04924300  |
| N | -3.70926800 | -3.46519000 | 0.04872800  |
| N | -4.96877900 | -1.45116500 | 0.79406000  |
| N | -1.25301900 | 4.78497500  | -0.88558100 |
| N | 1.25274000  | 4.78499400  | -0.88581400 |
| B | 4.93880100  | -2.85985300 | 0.50788000  |
| B | -4.93871800 | -2.86006800 | 0.50738300  |

|   |             |             |             |
|---|-------------|-------------|-------------|
| B | -0.00016700 | 5.45802000  | -1.13190400 |
| B | 6.18591800  | -0.71719100 | 1.10363500  |
| B | -6.18589900 | -0.71754400 | 1.10350000  |
| N | 6.14575000  | 0.70582000  | 1.11369600  |
| N | -6.14576800 | 0.70546500  | 1.11383400  |
| N | -4.89720900 | 2.85402400  | 0.50163600  |
| N | 4.89712600  | 2.85424100  | 0.50114200  |
| N | 3.66663300  | 4.81440500  | -0.44211200 |
| N | -3.66684200 | 4.81432300  | -0.44149800 |
| B | 3.70425700  | -4.83701900 | -0.40032000 |
| B | -3.70405800 | -4.83709000 | -0.40097700 |
| B | 2.49873000  | 5.49471400  | -0.90251500 |
| B | -2.49902200 | 5.49467600  | -0.90204500 |
| N | -2.48078300 | -5.37200200 | -0.88259900 |
| N | 0.00016800  | -5.28932600 | -1.17749800 |
| N | 2.48105700  | -5.37199000 | -0.88206700 |
| H | 2.57378400  | 6.63233800  | -1.26264100 |
| H | -0.00021000 | 6.59561900  | -1.50065400 |
| H | -2.57415200 | 6.63231700  | -1.26210000 |
| H | 5.92468700  | -3.52076000 | 0.61927400  |
| H | 7.20557500  | -1.29938800 | 1.31791000  |
| H | 4.69477400  | -5.50092300 | -0.37533900 |
| H | -4.69456900 | -5.50101000 | -0.37619200 |
| H | -5.92459600 | -3.52101400 | 0.61861800  |
| H | -7.20554400 | -1.29980700 | 1.31765600  |
| H | 7.01685800  | 1.19308900  | 1.27290100  |
| H | 5.73347200  | 3.42070100  | 0.53897400  |
| H | 4.53251400  | 5.33538400  | -0.42952500 |

|   |             |             |             |
|---|-------------|-------------|-------------|
| H | -4.53273400 | 5.33528100  | -0.42877000 |
| H | -5.73357300 | 3.42044900  | 0.53956300  |
| H | -7.01689000 | 1.19268200  | 1.27312100  |
| H | -2.47769500 | -6.33561900 | -1.18700300 |
| H | 0.00020000  | -6.26208400 | -1.45131500 |
| H | 2.47802800  | -6.33562800 | -1.18640400 |

Li<sup>+</sup>@V<sub>N2B</sub> *h*-BN

|    |             |             |             |
|----|-------------|-------------|-------------|
| Li | -0.00007400 | 1.09434400  | -0.22037200 |
| B  | -1.39271200 | -0.42890100 | -0.08903800 |
| B  | 1.39277400  | -0.42880400 | -0.08913500 |
| B  | 0.00010900  | -2.54663400 | 0.30199100  |
| B  | 2.48472500  | -2.73227400 | 0.05392100  |
| B  | 3.75479500  | -0.69981200 | -0.53694500 |
| B  | 2.41704000  | 1.25162800  | -0.20843700 |
| B  | 1.24542800  | 3.44345400  | 0.52811900  |
| B  | -1.24575200 | 3.44343400  | 0.52755800  |
| B  | -2.41708500 | 1.25146000  | -0.20895100 |
| B  | -3.75479500 | -0.70012900 | -0.53653300 |
| B  | -2.48460400 | -2.73234700 | 0.05492500  |
| N  | -2.49285800 | -1.31983800 | -0.20929800 |
| N  | 0.00005100  | -1.00865200 | 0.06202200  |
| N  | -1.22621400 | -3.31316700 | 0.40977600  |
| N  | -3.69012300 | 0.73027600  | -0.58856700 |
| N  | -2.40075900 | 2.70071200  | 0.06666100  |
| N  | -0.00016500 | 2.72846500  | 0.57115000  |
| N  | 2.40064300  | 2.70079400  | 0.06763600  |
| N  | 3.69013900  | 0.73062600  | -0.58813600 |
| N  | 2.49287600  | -1.31971200 | -0.20997300 |

|   |             |             |             |
|---|-------------|-------------|-------------|
| N | 1.22647900  | -3.31316200 | 0.40919800  |
| B | -1.23589400 | -4.73641400 | 0.76667000  |
| B | 1.23633100  | -4.73642900 | 0.76601200  |
| B | 4.91679700  | 1.47901900  | -0.79703200 |
| B | 3.65247500  | 3.49313200  | -0.08623900 |
| B | -3.65256900 | 3.49299500  | -0.08778800 |
| B | -4.91676000 | 1.47857900  | -0.79790300 |
| N | -4.96471200 | -1.43464600 | -0.73130100 |
| N | -3.72206400 | -3.48252800 | -0.03315700 |
| N | 3.72216500  | -3.48242000 | -0.03472500 |
| N | 4.96468800  | -1.43424000 | -0.73220700 |
| N | 1.26050200  | 4.84179100  | 0.88381900  |
| N | -1.26100900 | 4.84179000  | 0.88316200  |
| B | -4.94942200 | -2.85700800 | -0.46623700 |
| B | 4.94942700  | -2.85673100 | -0.46784300 |
| B | -0.00031400 | 5.52389100  | 1.11677900  |
| B | -6.16849700 | -0.69370700 | -1.07527300 |
| B | 6.16848000  | -0.69312100 | -1.07577100 |
| N | -6.09889400 | 0.73260700  | -1.12406100 |
| N | 6.09892000  | 0.73322000  | -1.12362200 |
| N | 4.83687500  | 2.88913400  | -0.60222200 |
| N | -4.83682400 | 2.88880800  | -0.60387100 |
| N | -3.63907500 | 4.87026800  | 0.32467000  |
| N | 3.63884200  | 4.87030900  | 0.32654300  |
| B | -3.71939700 | -4.87922400 | 0.35876400  |
| B | 3.71965300  | -4.87919100 | 0.35692300  |
| B | -2.51050400 | 5.57186600  | 0.82888900  |
| B | 2.51002900  | 5.57187000  | 0.83025700  |

|   |             |             |             |
|---|-------------|-------------|-------------|
| N | 2.48857100  | -5.43853000 | 0.78568600  |
| N | 0.00029100  | -5.38100000 | 1.04780000  |
| N | -2.48812400 | -5.43850600 | 0.78704100  |
| H | -2.58538800 | 6.71072000  | 1.16124100  |
| H | -0.00039800 | 6.66863200  | 1.43583500  |
| H | 2.58473500  | 6.71070700  | 1.16271000  |
| H | -5.94378200 | -3.49797100 | -0.58329700 |
| H | -7.19183000 | -1.26048000 | -1.29056400 |
| H | -4.71538700 | -5.52891200 | 0.32620600  |
| H | 4.71563000  | -5.52887400 | 0.32384600  |
| H | 5.94375200  | -3.49765600 | -0.58540800 |
| H | 7.19178700  | -1.25979000 | -1.29145900 |
| H | -6.95960000 | 1.22509300  | -1.32305300 |
| H | -5.66685700 | 3.45801400  | -0.70493500 |
| H | -4.50610600 | 5.38886400  | 0.26264000  |
| H | 4.50589500  | 5.38891700  | 0.26493400  |
| H | 5.66691300  | 3.45839400  | -0.70293600 |
| H | 6.95962900  | 1.22581200  | -1.32234000 |
| H | 2.49008800  | -6.41504500 | 1.04824400  |
| H | 0.00034300  | -6.36430400 | 1.28315100  |
| H | -2.48951900 | -6.41497200 | 1.04971700  |

Li<sup>+</sup>@V<sub>N2B</sub> *h*-BN (product)

|    |             |             |             |
|----|-------------|-------------|-------------|
| Li | -0.00000200 | 1.22055800  | 1.05502100  |
| B  | 1.38372900  | -0.39076000 | 0.13656800  |
| B  | -1.38374100 | -0.39061500 | 0.13662900  |
| B  | -0.00015100 | -2.51767700 | -0.26152300 |
| B  | -2.47761300 | -2.71306000 | -0.02084500 |
| B  | -3.77326100 | -0.70387700 | 0.53771700  |

|   |             |             |             |
|---|-------------|-------------|-------------|
| B | -2.45783600 | 1.25831100  | 0.23022200  |
| B | -1.25643200 | 3.45004400  | -0.30050100 |
| B | 1.25688600  | 3.44997000  | -0.30036000 |
| B | 2.45795000  | 1.25805300  | 0.23041100  |
| B | 3.77316400  | -0.70434900 | 0.53759900  |
| B | 2.47731800  | -2.71330700 | -0.02134100 |
| N | 2.48779400  | -1.30015500 | 0.25081700  |
| N | -0.00004600 | -0.98071100 | 0.00255600  |
| N | 1.22210200  | -3.28766800 | -0.38825200 |
| N | 3.74377600  | 0.72448400  | 0.54554200  |
| N | 2.45476400  | 2.69442200  | -0.05307800 |
| N | 0.00020600  | 2.82062200  | 0.03378100  |
| N | -2.45443900 | 2.69464000  | -0.05340100 |
| N | -3.74374900 | 0.72494200  | 0.54531400  |
| N | -2.48793600 | -1.29985100 | 0.25107000  |
| N | -1.22250000 | -3.28757500 | -0.38789200 |
| B | 1.23220300  | -4.70038100 | -0.78442600 |
| B | -1.23280700 | -4.70031500 | -0.78398200 |
| B | -4.99663600 | 1.45215100  | 0.64061300  |
| B | -3.72590700 | 3.46129000  | -0.06214900 |
| B | 3.72630400  | 3.46094200  | -0.06153800 |
| B | 4.99672800  | 1.45155100  | 0.64108700  |
| N | 4.97906100  | -1.45022900 | 0.72541700  |
| N | 3.70771700  | -3.47958800 | 0.06195700  |
| N | -3.70806300 | -3.47923000 | 0.06275400  |
| N | -4.97922700 | -1.44960500 | 0.72570700  |
| N | -1.25479400 | 4.83164900  | -0.72329800 |
| N | 1.25542600  | 4.83157300  | -0.72311900 |

|   |             |             |             |
|---|-------------|-------------|-------------|
| B | 4.94490700  | -2.87358700 | 0.48566000  |
| B | -4.94518400 | -2.87303000 | 0.48635500  |
| B | 0.00035800  | 5.50785300  | -0.96903900 |
| B | 6.21055400  | -0.72464500 | 0.99234600  |
| B | -6.21067200 | -0.72384500 | 0.99236900  |
| N | 6.17773900  | 0.70193400  | 0.96060500  |
| N | -6.17773800 | 0.70271900  | 0.96021400  |
| N | -4.94192200 | 2.84728200  | 0.35525600  |
| N | 4.94218500  | 2.84675600  | 0.35600600  |
| N | 3.69016100  | 4.83499400  | -0.48250600 |
| N | -3.68956900 | 4.83530200  | -0.48321100 |
| B | 3.70410600  | -4.86860400 | -0.35287300 |
| B | -3.70461400 | -4.86833200 | -0.35179000 |
| B | 2.51477100  | 5.54357200  | -0.83632500 |
| B | -2.51404800 | 5.54375100  | -0.83680500 |
| N | -2.47888500 | -5.41135800 | -0.81016100 |
| N | -0.00037400 | -5.33426700 | -1.09650800 |
| N | 2.47824500  | -5.41147600 | -0.81108700 |
| H | 2.55312800  | 6.67735200  | -1.19145000 |
| H | 0.00042300  | 6.62468700  | -1.37470500 |
| H | -2.55222700 | 6.67752200  | -1.19198100 |
| H | 5.93056000  | -3.52739700 | 0.60527600  |
| H | 7.22630400  | -1.30661800 | 1.20368900  |
| H | 4.69671400  | -5.52347500 | -0.31764800 |
| H | -4.69725400 | -5.52313700 | -0.31624000 |
| H | -5.93088100 | -3.52673700 | 0.60618200  |
| H | -7.22648000 | -1.30567100 | 1.20382800  |
| H | 7.05562900  | 1.18548200  | 1.09541100  |

|   |             |             |             |
|---|-------------|-------------|-------------|
| H | 5.78932000  | 3.39905200  | 0.36923300  |
| H | 4.56492300  | 5.34119600  | -0.53168600 |
| H | -4.56427500 | 5.34158300  | -0.53258000 |
| H | -5.78899400 | 3.39967900  | 0.36831000  |
| H | -7.05559600 | 1.18637400  | 1.09484300  |
| H | -2.47569400 | -6.38173500 | -1.09407500 |
| H | -0.00044600 | -6.31078400 | -1.35811000 |
| H | 2.47493100  | -6.38181300 | -1.09513500 |

Li@V<sub>N</sub> *h*-BN

|    |             |             |             |
|----|-------------|-------------|-------------|
| Li | -0.14707700 | 1.35952800  | 0.81035300  |
| B  | 1.54748800  | 0.45657500  | 0.01150500  |
| B  | -1.64378000 | 0.90718100  | 1.71950100  |
| B  | -0.58535500 | -1.19058300 | 0.36334800  |
| B  | 1.25818600  | 2.42280200  | -0.05132700 |
| B  | -1.29760600 | 3.37498300  | 0.51404000  |
| B  | -3.34397900 | 2.02568700  | 0.37668900  |
| B  | -2.94758300 | -0.42003400 | 0.19634500  |
| B  | -2.45090800 | -2.80609700 | -0.21132800 |
| B  | -0.13816800 | -3.65744300 | 0.11244400  |
| B  | 1.79585300  | -2.04860600 | 0.25235100  |
| B  | 3.83741100  | -0.65400300 | -0.12221100 |
| B  | 3.52733200  | 1.76608800  | -0.46379500 |
| N  | 2.95984500  | 0.46924400  | -0.24579900 |
| N  | 2.58112300  | 2.83972400  | -0.38849800 |
| N  | 3.24642500  | -1.92046700 | 0.18132600  |
| N  | 0.88305100  | -0.85346300 | 0.23690400  |
| N  | 1.27035900  | -3.40245900 | 0.32104800  |
| N  | -1.04373600 | -2.54157000 | 0.04258400  |



|   |             |             |             |
|---|-------------|-------------|-------------|
| N | -1.59602900 | -0.22461100 | 0.71682100  |
| N | -3.39170000 | -1.71703600 | -0.23697000 |
| N | -3.87323100 | 0.69425200  | 0.19233600  |
| N | -1.98184800 | 2.16474300  | 0.87424500  |
| N | 0.21186300  | 3.44642100  | 0.25148700  |
| B | 3.06319600  | 4.19450200  | -0.42932600 |
| B | 0.72670500  | 4.85553700  | 0.19027500  |
| B | -5.24535000 | 0.50880800  | -0.23721700 |
| B | -4.78881600 | -1.93718800 | -0.56626400 |
| B | 2.15847200  | -4.54761600 | 0.48544800  |
| B | 4.13858700  | -3.05757600 | 0.34887100  |
| N | 5.27359100  | -0.46409000 | -0.29318000 |
| N | 4.93429900  | 1.98163600  | -0.67621100 |
| N | -2.12690500 | 4.57293700  | 0.33706800  |
| N | -4.17401700 | 3.18109800  | 0.10687700  |
| N | -2.92368700 | -4.15849900 | -0.46889200 |
| N | -0.63894100 | -5.02143200 | -0.01014000 |
| B | 5.81518500  | 0.83854800  | -0.59535200 |
| B | -3.56070700 | 4.47337100  | 0.19646800  |
| B | -2.01942500 | -5.26457900 | -0.33397100 |
| B | 6.14877100  | -1.60096200 | -0.10266400 |
| B | -5.57328900 | 3.00185900  | -0.21536800 |
| N | 5.56024600  | -2.84812900 | 0.23398200  |
| N | -6.07940700 | 1.67890700  | -0.35368100 |
| N | -5.68681000 | -0.81852300 | -0.55536300 |
| N | 3.56852400  | -4.33763200 | 0.59544100  |
| N | 1.60408200  | -5.87380000 | 0.50010800  |
| N | -5.19966200 | -3.28039700 | -0.87954400 |

|   |             |             |             |
|---|-------------|-------------|-------------|
| B | 5.40016800  | 3.34562600  | -0.84286300 |
| B | -1.55560800 | 5.88754500  | 0.38114300  |
| B | 0.24234300  | -6.14247300 | 0.21110000  |
| B | -4.31108700 | -4.38797600 | -0.81361800 |
| N | -0.14475900 | 5.97115200  | 0.42079400  |
| N | 2.09135600  | 5.17868300  | -0.12531600 |
| N | 4.45647200  | 4.41014700  | -0.72741900 |
| H | -0.15932900 | -7.26418800 | 0.15262100  |
| H | -2.40856000 | -6.38115800 | -0.48609900 |
| H | -4.70489200 | -5.49167400 | -1.03980500 |
| H | 6.98786300  | 0.97784000  | -0.75695000 |
| H | 7.33096100  | -1.49445400 | -0.22108300 |
| H | 6.55153100  | 3.57669700  | -1.05112700 |
| H | -2.23028700 | 6.87006900  | 0.38102700  |
| H | -4.21809800 | 5.46383200  | 0.11146500  |
| H | -6.28726100 | 3.94507900  | -0.37531200 |
| H | 6.17847600  | -3.63785200 | 0.35866400  |
| H | 4.17448900  | -5.13972500 | 0.69930200  |
| H | 2.22222200  | -6.66114800 | 0.63742500  |
| H | -6.16495500 | -3.46639200 | -1.11331700 |
| H | -6.65054800 | -0.96421400 | -0.82333600 |
| H | -7.05063700 | 1.57447700  | -0.61243300 |
| H | 0.26713700  | 6.89392900  | 0.42725900  |
| H | 2.33896200  | 6.15863700  | -0.13954900 |
| H | 4.81046900  | 5.35394300  | -0.80100400 |

Li@V<sub>N</sub> *h*-BN (reactant)

|    |             |             |            |
|----|-------------|-------------|------------|
| Li | 0.14725100  | -1.35953800 | 0.81041800 |
| B  | -1.54746700 | -0.45671300 | 0.01165100 |

|   |             |             |             |
|---|-------------|-------------|-------------|
| B | 1.64395900  | -0.90700300 | 1.71948900  |
| B | 0.58522500  | 1.19062500  | 0.36336200  |
| B | -1.25794400 | -2.42291300 | -0.05118800 |
| B | 1.29791500  | -3.37487600 | 0.51407200  |
| B | 3.34420600  | -2.02538300 | 0.37671100  |
| B | 2.94752300  | 0.42027800  | 0.19626800  |
| B | 2.45060600  | 2.80630600  | -0.21136300 |
| B | 0.13780600  | 3.65744600  | 0.11253700  |
| B | -1.79606700 | 2.04843800  | 0.25240500  |
| B | -3.83747700 | 0.65362700  | -0.12224200 |
| B | -3.52716900 | -1.76642500 | -0.46376400 |
| N | -2.95980500 | -0.46955800 | -0.24573400 |
| N | -2.58086400 | -2.83993700 | -0.38843900 |
| N | -3.24662100 | 1.92015500  | 0.18131900  |
| N | -0.88315200 | 0.85338800  | 0.23697700  |
| N | -1.27069600 | 3.40233500  | 0.32114600  |
| N | 1.04347300  | 2.54165400  | 0.04261300  |
| N | 1.59598400  | 0.22470800  | 0.71674100  |
| N | 3.39149500  | 1.71733000  | -0.23705500 |
| N | 3.87330300  | -0.69389200 | 0.19231300  |
| N | 1.98209300  | -2.16457400 | 0.87427800  |
| N | -0.21152900 | -3.44641800 | 0.25157600  |
| B | -3.06280300 | -4.19476600 | -0.42925200 |
| B | -0.72622700 | -4.85558300 | 0.19029900  |
| B | 5.24540100  | -0.50830400 | -0.23724700 |
| B | 4.78858200  | 1.93762400  | -0.56638100 |
| B | -2.15891700 | 4.54740700  | 0.48553700  |
| B | -4.13889300 | 3.05718800  | 0.34880700  |

|   |             |             |             |
|---|-------------|-------------|-------------|
| N | -5.27363000 | 0.46359800  | -0.29330300 |
| N | -4.93410600 | -1.98209900 | -0.67625000 |
| N | 2.12739900  | -4.57270300 | 0.33705700  |
| N | 4.17438700  | -3.18069600 | 0.10694800  |
| N | 2.92324600  | 4.15875400  | -0.46894100 |
| N | 0.63845600  | 5.02148200  | -0.01001900 |
| B | -5.81509600 | -0.83909000 | -0.59546900 |
| B | 3.56119300  | -4.47301400 | 0.19651100  |
| B | 2.01889900  | 5.26475500  | -0.33393000 |
| B | -6.14891900 | 1.60040000  | -0.10286800 |
| B | 5.57363900  | -3.00131100 | -0.21529500 |
| N | -5.56052400 | 2.84762000  | 0.23381000  |
| N | 6.07960100  | -1.67830500 | -0.35365100 |
| N | 5.68670100  | 0.81906200  | -0.55545900 |
| N | -3.56895900 | 4.33729100  | 0.59543900  |
| N | -1.60464000 | 5.87363800  | 0.50027600  |
| N | 5.19928100  | 3.28086800  | -0.87970800 |
| B | -5.39984500 | -3.34613500 | -0.84287100 |
| B | 1.55622400  | -5.88737000 | 0.38102600  |
| B | -0.24292300 | 6.14243900  | 0.21127500  |
| B | 4.31060500  | 4.38836300  | -0.81374600 |
| N | 0.14537700  | -5.97112000 | 0.42067000  |
| N | -2.09086300 | -5.17885000 | -0.12523000 |
| N | -4.45605300 | -4.41056000 | -0.72735400 |
| H | 0.15865200  | 7.26419100  | 0.15283500  |
| H | 2.40792700  | 6.38137100  | -0.48606400 |
| H | 4.70429100  | 5.49209600  | -1.03996400 |
| H | -6.98775500 | -0.97848800 | -0.75712300 |

|   |             |             |             |
|---|-------------|-------------|-------------|
| H | -7.33109100 | 1.49379000  | -0.22137100 |
| H | -6.55118000 | -3.57732000 | -1.05116500 |
| H | 2.23099100  | -6.86983300 | 0.38082600  |
| H | 4.21866900  | -5.46341900 | 0.11152300  |
| H | 6.28772200  | -3.94445300 | -0.37519400 |
| H | -6.17883100 | 3.63728900  | 0.35844400  |
| H | -4.17500200 | 5.13932800  | 0.69927800  |
| H | -2.22284900 | 6.66092900  | 0.63761200  |
| H | 6.16454600  | 3.46695300  | -1.11352400 |
| H | 6.65042000  | 0.96485600  | -0.82344600 |
| H | 7.05082200  | -1.57376800 | -0.61239500 |
| H | -0.26641900 | -6.89394200 | 0.42706000  |
| H | -2.33837300 | -6.15882900 | -0.13946900 |
| H | -4.80995500 | -5.35439300 | -0.80092400 |

Li<sup>+</sup>@V<sub>N</sub> *h*-BN

|    |             |             |             |
|----|-------------|-------------|-------------|
| Li | -0.14903500 | 1.29233000  | 0.81232400  |
| B  | -1.74498900 | 0.85975600  | 1.58697500  |
| B  | 1.52497900  | 0.49499600  | -0.00619500 |
| B  | -0.53724500 | -1.24516200 | 0.46045700  |
| B  | 1.16699600  | 2.47436200  | -0.00163200 |
| B  | 3.41822300  | 1.88302000  | -0.56188800 |
| B  | 3.82757900  | -0.53757100 | -0.25059600 |
| B  | 1.86717100  | -1.99896000 | 0.29528900  |
| B  | -0.00881600 | -3.68014100 | 0.26589100  |
| B  | -2.35126300 | -2.90736600 | -0.13801400 |
| B  | -2.95595500 | -0.53206400 | 0.14739200  |
| B  | -3.43036400 | 1.92080600  | 0.31769300  |
| B  | -1.39617500 | 3.35502200  | 0.66950400  |

|   |             |             |             |
|---|-------------|-------------|-------------|
| N | -2.09951200 | 2.09781600  | 0.96269700  |
| N | 0.09425500  | 3.44316800  | 0.41396300  |
| N | -3.86628500 | 0.58049900  | 0.04249100  |
| N | -1.62931600 | -0.30822800 | 0.79035200  |
| N | -3.31427200 | -1.83650000 | -0.27266400 |
| N | -0.95952900 | -2.58850100 | 0.17357300  |
| N | 0.89611600  | -0.82109100 | 0.31159600  |
| N | 1.38708600  | -3.35734600 | 0.43318700  |
| N | 3.29364400  | -1.81056500 | 0.12686000  |
| N | 2.89811600  | 0.55806900  | -0.34685900 |
| N | 2.44347800  | 2.93109700  | -0.38921000 |
| B | 0.58108900  | 4.88099900  | 0.40481300  |
| B | 2.89493400  | 4.30544100  | -0.38775600 |
| B | 4.24061900  | -2.91786800 | 0.27149400  |
| B | 2.32770700  | -4.47244800 | 0.59076800  |
| B | -4.68162400 | -2.09760200 | -0.71813200 |
| B | -5.20563200 | 0.35929100  | -0.51013300 |
| N | -4.24079500 | 3.06256500  | 0.03182500  |
| N | -2.26184200 | 4.50452200  | 0.52572400  |
| N | 4.79463900  | 2.14443500  | -0.83725400 |
| N | 5.23415100  | -0.29642800 | -0.50224600 |
| N | -0.47414600 | -5.04931800 | 0.20255200  |
| N | -2.77198500 | -4.26844200 | -0.35723400 |
| B | -3.68244200 | 4.36912600  | 0.26195200  |
| B | 5.71804700  | 1.02434200  | -0.82939400 |
| B | -1.84206300 | -5.34854400 | -0.13286000 |
| B | -5.60106600 | 2.85211700  | -0.45049300 |
| B | 6.16318600  | -1.40299300 | -0.34768000 |

|   |             |             |             |
|---|-------------|-------------|-------------|
| N | -6.03678100 | 1.51889700  | -0.68922500 |
| N | 5.63701300  | -2.65949200 | 0.05231700  |
| N | 3.72883400  | -4.20287000 | 0.60361100  |
| N | -5.57951300 | -0.98111300 | -0.83788200 |
| N | -5.03167700 | -3.45839700 | -0.98822400 |
| N | 1.81069300  | -5.80649000 | 0.69204600  |
| B | -1.72378000 | 5.83915000  | 0.67314000  |
| B | 5.21760500  | 3.52968900  | -0.98007800 |
| B | -4.13117200 | -4.54591200 | -0.78907000 |
| B | 0.45185800  | -6.13613300 | 0.45854100  |
| N | 4.25440900  | 4.56426100  | -0.75862700 |
| N | 1.91535100  | 5.24142400  | 0.03839100  |
| N | -0.31777000 | 5.94571200  | 0.74113600  |
| H | -4.48631400 | -5.66516100 | -0.98000600 |
| H | -2.20197800 | -6.47718800 | -0.23203700 |
| H | 0.08160000  | -7.26667700 | 0.46608200  |
| H | -4.36195900 | 5.33991000  | 0.18673800  |
| H | -6.31960700 | 3.77948900  | -0.64467900 |
| H | -2.43043200 | 6.79180500  | 0.73304100  |
| H | 6.34474100  | 3.79801200  | -1.24753400 |
| H | 6.87019000  | 1.20406000  | -1.06013700 |
| H | 7.32757600  | -1.25628300 | -0.54279400 |
| H | -6.97783800 | 1.40192900  | -1.04125900 |
| H | -6.51554400 | -1.15304200 | -1.18115600 |
| H | -5.96896700 | -3.68604200 | -1.29173600 |
| H | 2.45588200  | -6.57036800 | 0.84198400  |
| H | 4.37104900  | -4.97784100 | 0.70098700  |
| H | 6.29282000  | -3.42255800 | 0.15395600  |

|                                                         |             |             |             |
|---------------------------------------------------------|-------------|-------------|-------------|
| H                                                       | 4.58725100  | 5.51776400  | -0.81233400 |
| H                                                       | 2.14232100  | 6.22712600  | 0.05820100  |
| H                                                       | 0.06874100  | 6.87750100  | 0.81550000  |
| Li <sup>+</sup> @V <sub>N</sub> <i>h</i> -BN (reactant) |             |             |             |
| Li                                                      | 0.23945300  | -3.07253500 | 1.69912700  |
| B                                                       | -1.48107300 | -0.36684300 | -0.04133200 |
| B                                                       | 0.91512900  | -1.17082900 | 0.56009100  |
| B                                                       | 0.52186500  | 1.24294500  | 0.08066600  |
| B                                                       | -1.17276600 | -2.33208900 | -0.10760600 |
| B                                                       | 1.18952100  | -3.45357900 | -0.38146100 |
| B                                                       | 3.21459300  | -2.11722200 | 0.26188600  |
| B                                                       | 2.85746600  | 0.33833800  | 0.43805800  |
| B                                                       | 2.50913900  | 2.78725200  | 0.13291700  |
| B                                                       | 0.21415500  | 3.69043500  | -0.31594500 |
| B                                                       | -1.77347000 | 2.14844700  | -0.21898600 |
| B                                                       | -3.77105000 | 0.74053800  | 0.20793200  |
| B                                                       | -3.46479900 | -1.69907500 | 0.42631200  |
| N                                                       | -2.89042700 | -0.40671400 | 0.24131200  |
| N                                                       | -2.50788800 | -2.76805500 | 0.26486200  |
| N                                                       | -3.20558700 | 2.01739400  | -0.09777900 |
| N                                                       | -0.88521000 | 0.95730100  | -0.12529800 |
| N                                                       | -1.21006400 | 3.46832500  | -0.39651500 |
| N                                                       | 1.08253400  | 2.55964700  | -0.03650000 |
| N                                                       | 1.40020200  | 0.13558000  | 0.41739000  |
| N                                                       | 3.39098200  | 1.66185700  | 0.37627900  |
| N                                                       | 3.73751500  | -0.80965300 | 0.48468800  |
| N                                                       | 1.75082300  | -2.31263300 | 0.30644400  |
| N                                                       | -0.26488600 | -3.49614600 | -0.39168300 |



|   |             |             |             |
|---|-------------|-------------|-------------|
| B | -3.05101300 | -4.11462000 | 0.15740500  |
| B | -0.83549600 | -4.83803100 | -0.70626900 |
| B | 5.18748200  | -0.61634200 | 0.50965000  |
| B | 4.83218700  | 1.86952900  | 0.48609500  |
| B | -2.08910100 | 4.62239400  | -0.58613200 |
| B | -4.09014000 | 3.17151600  | -0.21395200 |
| N | -5.19123100 | 0.55646000  | 0.44895900  |
| N | -4.85804600 | -1.90722300 | 0.69172600  |
| N | 2.04615400  | -4.52195500 | -0.81755500 |
| N | 4.05706800  | -3.24224200 | -0.05704800 |
| N | 3.05611500  | 4.12125800  | 0.02778200  |
| N | 0.77868500  | 5.01577600  | -0.46545700 |
| B | -5.73378900 | -0.75029100 | 0.71953000  |
| B | 3.48288200  | -4.43667900 | -0.61737100 |
| B | 2.19067000  | 5.23318800  | -0.28712700 |
| B | -6.06846200 | 1.71233600  | 0.34626200  |
| B | 5.50356300  | -3.07608200 | 0.06129900  |
| N | -5.49719900 | 2.96645000  | 0.00171800  |
| N | 6.01066500  | -1.79342500 | 0.39731900  |
| N | 5.68427900  | 0.71658100  | 0.60589300  |
| N | -3.50677900 | 4.43524600  | -0.52273300 |
| N | -1.49138200 | 5.90871000  | -0.80687300 |
| N | 5.32102500  | 3.21395100  | 0.44121800  |
| B | -5.34496300 | -3.26766100 | 0.78551000  |
| B | 1.44243000  | -5.72461500 | -1.36176300 |
| B | -0.09289200 | 6.14203700  | -0.74322400 |
| B | 4.47900900  | 4.33850400  | 0.20376100  |
| N | 0.02876200  | -5.82948100 | -1.28244000 |

|   |             |             |             |
|---|-------------|-------------|-------------|
| N | -2.18384000 | -5.12559800 | -0.36124300 |
| N | -4.42042700 | -4.32750900 | 0.52332700  |
| H | 0.35344700  | 7.23426300  | -0.90060200 |
| H | 2.64534100  | 6.32692000  | -0.39547300 |
| H | 4.93870500  | 5.43452700  | 0.14264100  |
| H | -6.89399100 | -0.89245700 | 0.93923300  |
| H | -7.23838000 | 1.60452400  | 0.53840200  |
| H | -6.48232800 | -3.50317700 | 1.04200700  |
| H | 2.10639200  | -6.60044400 | -1.81301300 |
| H | 4.17334100  | -5.35315200 | -0.92558200 |
| H | 6.23113200  | -3.99734600 | -0.13095100 |
| H | -6.12508200 | 3.75586900  | -0.06903500 |
| H | -4.10688600 | 5.24265900  | -0.62521200 |
| H | -2.08886700 | 6.70692900  | -0.97412300 |
| H | 6.31163100  | 3.39042300  | 0.53967000  |
| H | 6.68472200  | 0.86294000  | 0.63713900  |
| H | 7.01634500  | -1.69709200 | 0.44735700  |
| H | -0.38547700 | -6.69911800 | -1.59231700 |
| H | -2.54435100 | -6.05544000 | -0.53059400 |
| H | -4.79234400 | -5.26805300 | 0.51751000  |

Li@Pristine *h*-BN

|    |             |             |            |
|----|-------------|-------------|------------|
| Li | -0.32297300 | -0.25168300 | 1.02934600 |
| B  | -0.97114300 | 1.45040200  | 0.75537200 |
| B  | -0.32804400 | -2.00917300 | 1.51495400 |
| B  | 1.50635800  | -0.03480400 | 0.66423000 |
| B  | -2.98417200 | 0.13293600  | 0.71028000 |
| B  | -2.78685500 | -2.52074900 | 0.62467700 |
| B  | -0.62542300 | -3.80869600 | 0.09050300 |

|   |             |             |             |
|---|-------------|-------------|-------------|
| B | 1.58275000  | -2.55035200 | 0.19506800  |
| B | 3.66083800  | -1.18959800 | 0.04786700  |
| B | 3.58243600  | 1.30535200  | 0.33077900  |
| B | 1.34583600  | 2.48187100  | 0.35658700  |
| B | -0.80706900 | 3.75121100  | -0.17472700 |
| B | -2.98973200 | 2.48236300  | -0.16089000 |
| N | -1.56091700 | 2.57498800  | 0.09769600  |
| N | -1.76712900 | 0.44253100  | 1.32049700  |
| N | -3.69669700 | 1.24399700  | 0.05773000  |
| N | 0.62922900  | 3.72103800  | 0.05421200  |
| N | 0.63770400  | 1.22023400  | 0.65146200  |
| N | 2.80597500  | 2.51921900  | 0.35732000  |
| N | 2.90628800  | 0.01917300  | 0.36080200  |
| N | 0.92390100  | -1.43767100 | 0.87041800  |
| N | 2.97521400  | -2.44789000 | -0.13588800 |
| N | 0.82301100  | -3.75765700 | -0.07459100 |
| N | -1.30614900 | -2.69231300 | 0.75047300  |
| N | -3.53548100 | -1.26062400 | 0.62258900  |
| B | -5.09398700 | 1.14087600  | -0.25199400 |
| B | -4.97136200 | -1.31749800 | 0.33103500  |
| B | 1.51595600  | -4.90926700 | -0.63576200 |
| B | 3.68685500  | -3.62766200 | -0.59845300 |
| B | 3.51114400  | 3.79329400  | 0.28413200  |
| B | 1.34636200  | 4.97620100  | -0.09921400 |
| N | -1.50880900 | 4.93667400  | -0.64422600 |
| N | -3.67425500 | 3.65228400  | -0.69516400 |
| N | -3.49125900 | -3.77552600 | 0.32374400  |
| N | -1.37560900 | -4.97328600 | -0.30526600 |

|   |             |             |             |
|---|-------------|-------------|-------------|
| N | 5.09705600  | -1.12447100 | -0.14124500 |
| N | 5.03522900  | 1.33926500  | 0.24409600  |
| B | -2.93295600 | 4.87102200  | -0.90822200 |
| B | -2.80417300 | -4.97223500 | -0.08518200 |
| B | 5.78448900  | 0.13190500  | 0.02181300  |
| B | -0.77208500 | 6.16840900  | -0.79153400 |
| B | -0.68046900 | -6.13068900 | -0.82453900 |
| N | 0.61778600  | 6.15823500  | -0.48354100 |
| N | 0.73551800  | -6.07091800 | -0.96941100 |
| N | 2.93597800  | -4.82664300 | -0.83483200 |
| N | 2.76067500  | 4.99564400  | 0.12257200  |
| N | 4.95060400  | 3.79421600  | 0.34822700  |
| N | 5.10845700  | -3.51717500 | -0.78287700 |
| B | -5.09107900 | 3.55041700  | -0.99106000 |
| B | -4.94167000 | -3.81605300 | 0.30031500  |
| B | 5.72723300  | 2.61015500  | 0.30202100  |
| B | 5.82554800  | -2.31160900 | -0.54187500 |
| N | -5.64515800 | -2.59375900 | 0.35491300  |
| N | -5.71500500 | -0.12951000 | -0.00427500 |
| N | -5.76300600 | 2.31267300  | -0.76909400 |
| H | 6.91891500  | 2.65899400  | 0.29373100  |
| H | 6.97272200  | 0.17352500  | -0.05765000 |
| H | 7.00924900  | -2.27666400 | -0.68369700 |
| H | -3.49481400 | 5.84388100  | -1.31068800 |
| H | -1.30550200 | 7.17254900  | -1.15419700 |
| H | -5.69019500 | 4.49039200  | -1.42030000 |
| H | -5.52231200 | -4.85382400 | 0.20376300  |
| H | -3.42147900 | -5.97108900 | -0.28936100 |

|   |             |             |             |
|---|-------------|-------------|-------------|
| H | -1.27814900 | -7.11749200 | -1.12690200 |
| H | 1.12359200  | 7.02663200  | -0.59021600 |
| H | 3.25742600  | 5.87144200  | 0.03384200  |
| H | 5.44019400  | 4.67826000  | 0.35075600  |
| H | 5.63922600  | -4.32471600 | -1.07854100 |
| H | 3.42154200  | -5.63990900 | -1.18863200 |
| H | 1.19825700  | -6.88610800 | -1.34727600 |
| H | -6.65127100 | -2.62279100 | 0.26554000  |
| H | -6.69961800 | -0.24154000 | -0.20523700 |
| H | -6.74884500 | 2.27428000  | -0.98827400 |

Li@Pristine *h*-BN (reactant)

|    |             |             |             |
|----|-------------|-------------|-------------|
| Li | 0.00004300  | 0.00000000  | 0.00078000  |
| B  | 0.00000000  | 0.00000000  | 1.97209545  |
| B  | 1.55853497  | 0.00000000  | -1.31790615 |
| B  | 0.05672456  | 2.05544910  | -0.07409269 |
| B  | 0.43381763  | -2.24356284 | 1.17862833  |
| B  | 0.97751028  | -2.63703444 | -1.39828402 |
| B  | 0.58599609  | -0.90805496 | -3.24213250 |
| B  | 0.17434102  | 1.50630711  | -2.58126207 |
| B  | -0.50370556 | 3.78184294  | -1.83556195 |
| B  | -0.84224837 | 4.28313663  | 0.60268639  |
| B  | -0.90074950 | 2.37840431  | 2.25779749  |
| B  | -1.53073356 | 0.49514578  | 3.87111571  |
| B  | -0.99442639 | -1.88132977 | 3.20841989  |
| N  | -0.89324752 | -0.44273379 | 3.00635045  |
| N  | 0.85271385  | -0.90214977 | 1.31167790  |
| N  | -0.41189577 | -2.79052645 | 2.25693918  |
| N  | -1.43513949 | 1.90921334  | 3.54316732  |

|   |             |             |             |
|---|-------------|-------------|-------------|
| N | -0.22400965 | 1.46289631  | 1.30784290  |
| N | -1.04590758 | 3.79778623  | 1.94433729  |
| N | -0.42518756 | 3.35986869  | -0.43963785 |
| N | 0.64305216  | 1.22727312  | -1.21710069 |
| N | -0.30559351 | 2.82281444  | -2.89771113 |
| N | 0.27706390  | 0.47294307  | -3.59759649 |
| N | 1.00440090  | -1.21860983 | -1.86527886 |
| N | 0.73284842  | -3.09657187 | -0.02429131 |
| B | -0.56205296 | -4.21524486 | 2.43189269  |
| B | 0.59841539  | -4.53815436 | 0.20757142  |
| B | -0.04257512 | 0.81208604  | -4.97748931 |
| B | -0.52488504 | 3.18852437  | -4.28710983 |
| B | -1.49752394 | 4.74113817  | 2.96021951  |
| B | -1.96055011 | 2.84821373  | 4.52065153  |
| N | -2.21261320 | 0.00261360  | 5.05882068  |
| N | -1.74325969 | -2.37116939 | 4.36148982  |
| N | 1.06413021  | -3.63749863 | -2.47656507 |
| N | 0.56411622  | -1.94211838 | -4.25320588 |
| N | -0.83488520 | 5.15455956  | -2.16525293 |
| N | -1.06844113 | 5.68028205  | 0.26196211  |
| B | -2.31937775 | -1.42545439 | 5.28558469  |
| B | 0.90303355  | -3.29121103 | -3.86420798 |
| B | -1.05264865 | 6.11186807  | -1.10989887 |
| B | -2.72812454 | 0.95640642  | 6.01074521  |
| B | 0.27936506  | -1.59694681 | -5.63144315 |
| N | -2.55696427 | 2.34160997  | 5.73035290  |
| N | -0.00421897 | -0.23988256 | -5.95816717 |
| N | -0.38620019 | 2.17144887  | -5.28889357 |

|   |             |             |             |
|---|-------------|-------------|-------------|
| N | -1.88212551 | 4.25064258  | 4.24335886  |
| N | -1.56890084 | 6.14059295  | 2.62468152  |
| N | -0.86144056 | 4.55755215  | -4.56936004 |
| B | -1.87248437 | -3.80464544 | 4.54525316  |
| B | 1.18555522  | -5.05001915 | -2.16684719 |
| B | -1.39161158 | 6.62959644  | 1.30683019  |
| B | -0.99417918 | 5.54410250  | -3.55211390 |
| N | 1.00012331  | -5.45896443 | -0.82884207 |
| N | 0.04918671  | -5.05079150 | 1.43732920  |
| N | -1.28947102 | -4.68614410 | 3.58826802  |
| H | -1.52178797 | 7.78941522  | 1.06099598  |
| H | -1.24935296 | 7.25630081  | -1.37734119 |
| H | -1.24894639 | 6.67352148  | -3.83845137 |
| H | -2.89681955 | -1.81864309 | 6.25309776  |
| H | -3.27756493 | 0.60326410  | 7.00962512  |
| H | -2.46415107 | -4.24481371 | 5.48489266  |
| H | 1.40338812  | -5.84750708 | -3.02707849 |
| H | 1.01081246  | -4.13163855 | -4.70237881 |
| H | 0.28765841  | -2.43033537 | -6.48456661 |
| H | -2.92187317 | 3.00050655  | 6.40416994  |
| H | -2.23072763 | 4.90503353  | 4.93031282  |
| H | -1.83087952 | 6.80331169  | 3.34120760  |
| H | -0.99536605 | 4.85312265  | -5.52641670 |
| H | -0.57059478 | 2.41356319  | -6.25311747 |
| H | -0.20923556 | -0.02377121 | -6.92393535 |
| H | 1.01406580  | -6.44978601 | -0.63092296 |
| H | -0.02588965 | -6.05513397 | 1.52710094  |
| H | -1.40026088 | -5.67856300 | 3.74390463  |

Li@ Pristine *h*-BN (product)

|    |             |             |             |
|----|-------------|-------------|-------------|
| Li | 0.00002600  | 0.00000000  | 0.00950000  |
| B  | 0.00000000  | 0.00000000  | 2.00084643  |
| B  | 1.43697127  | 0.00000000  | -1.25554673 |
| B  | -0.21730746 | -1.96456721 | -0.09282748 |
| B  | 1.80821545  | 1.55965830  | 1.82494225  |
| B  | 3.44737546  | 1.37497606  | -0.26435237 |
| B  | 3.54567383  | -0.63736967 | -1.88633718 |
| B  | 1.59730060  | -2.28323733 | -1.85836395 |
| B  | -0.19801800 | -3.98445893 | -1.58922883 |
| B  | -1.91997077 | -3.75668612 | 0.22569809  |
| B  | -1.60186447 | -2.01831153 | 2.03694766  |
| B  | -1.04211658 | -0.69872457 | 4.14791174  |
| B  | 0.82510008  | 0.99815103  | 4.05760721  |
| N  | -0.07944038 | 0.05360079  | 3.42276975  |
| N  | 0.67016645  | 0.99741333  | 1.28092491  |
| N  | 1.83176675  | 1.69470201  | 3.28784749  |
| N  | -1.85846055 | -1.66282352 | 3.42654418  |
| N  | -0.62377099 | -1.29203085 | 1.21350714  |
| N  | -2.33215431 | -3.14602637 | 1.46435406  |
| N  | -0.78442881 | -3.21330396 | -0.50041681 |
| N  | 0.83275062  | -1.36238981 | -1.04084570 |
| N  | 1.04780892  | -3.56518568 | -2.18862032 |
| N  | 2.89378451  | -1.85705952 | -2.34956696 |
| N  | 2.78321627  | 0.30747979  | -1.08030140 |
| N  | 3.00583301  | 1.94031609  | 1.00975886  |
| B  | 2.75478762  | 2.57707276  | 3.92395785  |
| B  | 3.91487446  | 2.86476999  | 1.69461013  |



|   |             |             |             |
|---|-------------|-------------|-------------|
| B | 3.62610857  | -2.74296472 | -3.24408622 |
| B | 1.73012239  | -4.40278574 | -3.16080124 |
| B | -3.44414667 | -3.74361993 | 2.19390311  |
| B | -2.91630611 | -2.32051161 | 4.17598568  |
| N | -1.17637741 | -0.46060237 | 5.57740910  |
| N | 0.72686890  | 1.18636627  | 5.49643674  |
| N | 4.76665526  | 1.72893196  | -0.79878136 |
| N | 4.88527781  | -0.30333592 | -2.27788456 |
| N | -0.82549952 | -5.21440619 | -2.03220029 |
| N | -2.59676694 | -4.93424709 | -0.29829488 |
| B | -0.28390123 | 0.47232772  | 6.23720184  |
| B | 5.43969307  | 0.94444352  | -1.80028926 |
| B | -2.05862734 | -5.64820869 | -1.42487514 |
| B | -2.23246719 | -1.12942424 | 6.29781503  |
| B | 5.59103323  | -1.15986093 | -3.20173474 |
| N | -3.08617473 | -2.00756148 | 5.57203062  |
| N | 4.94593352  | -2.34609740 | -3.65687745 |
| N | 3.00129456  | -3.96680962 | -3.66209244 |
| N | -3.74932474 | -3.27241491 | 3.50530810  |
| N | -4.18343842 | -4.81498188 | 1.57601525  |
| N | 1.07802499  | -5.61869078 | -3.56517206 |
| B | 1.65792460  | 2.09356493  | 6.14098887  |
| B | 5.51225420  | 2.83477165  | -0.22686859 |
| B | -3.77860458 | -5.43840589 | 0.36988918  |
| B | -0.18366695 | -6.02566306 | -3.04729382 |
| N | 5.04243613  | 3.40682859  | 0.97475563  |
| N | 3.71927395  | 3.22045309  | 3.07735492  |
| N | 2.64174130  | 2.75976088  | 5.35291993  |

|   |             |             |             |
|---|-------------|-------------|-------------|
| H | -4.38466998 | -6.36454564 | -0.07453162 |
| H | -2.61591578 | -6.61683823 | -1.83855458 |
| H | -0.69726088 | -7.03035209 | -3.43369246 |
| H | -0.39065992 | 0.64600482  | 7.41302358  |
| H | -2.39677987 | -0.95260268 | 7.46661389  |
| H | 1.60625343  | 2.27918970  | 7.31980756  |
| H | 6.51429160  | 3.22721101  | -0.74198845 |
| H | 6.49901117  | 1.29667756  | -2.21771159 |
| H | 6.69173765  | -0.88518947 | -3.56974328 |
| H | -3.82243767 | -2.47037872 | 6.08686039  |
| H | -4.49661592 | -3.71687966 | 4.02073382  |
| H | -4.98699136 | -5.19601191 | 2.05597083  |
| H | 1.51130459  | -6.21244107 | -4.25870273 |
| H | 3.49493270  | -4.56252091 | -4.31309003 |
| H | 5.46627357  | -2.93944540 | -4.28824776 |
| H | 5.60388314  | 4.12749881  | 1.40661839  |
| H | 4.38981776  | 3.85407511  | 3.49123093  |
| H | 3.27679599  | 3.38239600  | 5.83294438  |

Li<sup>+</sup>@ Pristine *h*-BN

|    |             |             |             |
|----|-------------|-------------|-------------|
| Li | -0.00002300 | -0.00019600 | -0.00085000 |
| B  | 1.30472900  | -0.96660400 | -0.00055700 |
| B  | -1.48947600 | -0.64619200 | -0.00028300 |
| B  | 0.18448700  | 1.61256600  | -0.00152300 |
| B  | -0.34002100 | -2.96904800 | 0.00017100  |
| B  | -2.87399000 | -2.65786600 | -0.00004700 |
| B  | -3.90458400 | -0.28454600 | 0.00016700  |
| B  | -2.40169600 | 1.77918900  | -0.00033300 |
| B  | -0.86498200 | 3.81757100  | -0.00034200 |

|   |             |             |             |
|---|-------------|-------------|-------------|
| B | 1.70562500  | 3.52315600  | -0.00075400 |
| B | 2.74156700  | 1.19003800  | -0.00072600 |
| B | 3.73915400  | -1.15978200 | 0.00013400  |
| B | 2.19871600  | -3.23875500 | 0.00036200  |
| N | 2.41073700  | -1.78579500 | 0.00004900  |
| N | -0.17514000 | -1.52921100 | -0.00011100 |
| N | 0.85094300  | -3.78746600 | 0.00037800  |
| N | 3.87141500  | 0.28921200  | -0.00006200 |
| N | 1.41202100  | 0.61259500  | -0.00135100 |
| N | 2.85477000  | 2.63046200  | -0.00067400 |
| N | 0.34124200  | 2.97990700  | -0.00134600 |
| N | -1.23704200 | 0.91635300  | -0.00127600 |
| N | -2.18618900 | 3.20787500  | 0.00001500  |
| N | -3.70578400 | 1.15690500  | 0.00030100  |
| N | -2.75193600 | -1.19454400 | 0.00031100  |
| N | -1.68516500 | -3.49709300 | 0.00003800  |
| B | 0.67778800  | -5.24085800 | 0.00035000  |
| B | -1.84518700 | -4.95199400 | -0.00016800 |
| B | -4.87804700 | 2.03361800  | 0.00072900  |
| B | -3.36625900 | 4.07402200  | 0.00063400  |
| B | 4.20010000  | 3.20750800  | -0.00025600 |
| B | 5.21148300  | 0.87832000  | 0.00017800  |
| N | 4.87891600  | -2.03735700 | 0.00045400  |
| N | 3.37034400  | -4.07330600 | 0.00056600  |
| N | -4.20394600 | -3.20615000 | -0.00054500 |
| N | -5.21315200 | -0.88188600 | -0.00005800 |
| N | -0.67463500 | 5.24325200  | 0.00029900  |
| N | 1.84268700  | 4.95494800  | -0.00021500 |

|   |             |             |             |
|---|-------------|-------------|-------------|
| B | 4.69556900  | -3.47832300 | 0.00061200  |
| B | -5.36046900 | -2.32706200 | -0.00054300 |
| B | 0.66490400  | 5.80518800  | 0.00016800  |
| B | 6.21043500  | -1.44478100 | 0.00061500  |
| B | -6.37630100 | -0.00366100 | 0.00029600  |
| N | 6.32886000  | -0.02475900 | 0.00049900  |
| N | -6.17060700 | 1.40645600  | 0.00088000  |
| N | -4.66185600 | 3.45369900  | 0.00093300  |
| N | 5.32197900  | 2.31043300  | 0.00006300  |
| N | 4.30319200  | 4.64040600  | -0.00017700 |
| N | -3.14253600 | 5.49314200  | 0.00087800  |
| B | 3.19129600  | -5.51956600 | 0.00067000  |
| B | -4.35665300 | -4.65550600 | -0.00085900 |
| B | 3.18471600  | 5.52336600  | -0.00013000 |
| B | -1.85336200 | 6.10036100  | 0.00084300  |
| N | -3.18599200 | -5.46806700 | -0.00062100 |
| N | -0.66009400 | -5.76376200 | 0.00007700  |
| N | 1.86729800  | -6.04657000 | 0.00058600  |
| H | 3.34199500  | 6.70228700  | -0.00003600 |
| H | 0.80001200  | 6.98611000  | 0.00045400  |
| H | -1.74017800 | 7.28436300  | 0.00126600  |
| H | 5.65058600  | -4.18597700 | 0.00079000  |
| H | 7.17928400  | -2.13468300 | 0.00084500  |
| H | 4.13339800  | -6.24556900 | 0.00080700  |
| H | -5.43854900 | -5.14961500 | -0.00130700 |
| H | -6.45081500 | -2.80029400 | -0.00098500 |
| H | -7.47610500 | -0.45643800 | 0.00012700  |
| H | 7.26778900  | 0.35156800  | 0.00065400  |

|   |             |             |             |
|---|-------------|-------------|-------------|
| H | 6.25033300  | 2.71333600  | 0.00027600  |
| H | 5.21930900  | 5.06924300  | -0.00006900 |
| H | -3.93780600 | 6.11822600  | 0.00126100  |
| H | -5.47505900 | 4.05610500  | 0.00123600  |
| H | -7.00014600 | 1.98533300  | 0.00115400  |
| H | -3.32955900 | -6.46936900 | -0.00079200 |
| H | -0.77527000 | -6.76921000 | -0.00007100 |
| H | 1.78084600  | -7.05440500 | 0.00064500  |

Li<sup>+</sup>@Pristine *h*-BN (reactant)

|    |             |             |             |
|----|-------------|-------------|-------------|
| Li | 0.00059600  | -0.00076500 | -1.82947900 |
| B  | 0.97986700  | 1.10223400  | -0.03337800 |
| B  | -1.44456800 | 0.29750000  | -0.03314800 |
| B  | 0.46461600  | -1.39965100 | -0.03334100 |
| B  | -0.92039000 | 2.77229500  | -0.06725400 |
| B  | -3.30283500 | 1.96910700  | 0.01619000  |
| B  | -3.81217700 | -0.50404300 | 0.01560000  |
| B  | -1.94088400 | -2.18307100 | -0.06792600 |
| B  | -0.05405100 | -3.84456700 | 0.01591200  |
| B  | 2.34260300  | -3.04910000 | 0.01636600  |
| B  | 2.86116400  | -0.58917800 | -0.06767100 |
| B  | 3.35683800  | 1.87554900  | 0.01529300  |
| B  | 1.46950300  | 3.55315900  | 0.01548200  |
| N  | 1.92722100  | 2.16782500  | 0.00689800  |
| N  | -0.45450500 | 1.36906100  | -0.14469800 |
| N  | 0.04990900  | 3.83252700  | -0.02631500 |
| N  | 3.80045800  | 0.49855800  | -0.02671200 |
| N  | 1.41278400  | -0.29091700 | -0.14499600 |
| N  | 3.29428200  | -1.95944500 | -0.02593100 |

|   |             |             |             |
|---|-------------|-------------|-------------|
| N | 0.91386400  | -2.75269800 | 0.00746800  |
| N | -0.95835500 | -1.07799000 | -0.14469400 |
| N | -1.46844700 | -3.54030100 | -0.02670900 |
| N | -3.34421600 | -1.87293200 | -0.02694900 |
| N | -2.84108000 | 0.58506200  | 0.00721100  |
| N | -2.33209000 | 3.04182900  | -0.02572700 |
| B | -0.40832200 | 5.22218500  | 0.01237700  |
| B | -2.79596800 | 4.42962100  | 0.01305000  |
| B | -4.31873100 | -2.96463400 | 0.01106400  |
| B | -2.43850500 | -4.63593700 | 0.01129800  |
| B | 4.72701800  | -2.25757700 | 0.01262100  |
| B | 5.23439900  | 0.20627100  | 0.01169700  |
| N | 4.30723600  | 2.96175400  | 0.05814500  |
| N | 2.43706200  | 4.62414700  | 0.05837000  |
| N | -4.71877800 | 2.24892300  | 0.05965200  |
| N | -5.22348800 | -0.20175700 | 0.05894400  |
| N | 0.41159100  | -5.21056800 | 0.05943300  |
| N | 2.78641300  | -4.42234700 | 0.06005000  |
| B | 3.85034800  | 4.33082900  | 0.08568100  |
| B | -5.67611300 | 1.16871500  | 0.08696600  |
| B | 1.82573700  | -5.49955800 | 0.08741400  |
| B | 5.73103500  | 2.67091300  | 0.07728200  |
| B | -6.19072400 | -1.28625300 | 0.07777200  |
| N | 6.14674700  | 1.31198600  | 0.05202200  |
| N | -5.71120900 | -2.62398000 | 0.05166600  |
| N | -3.83132600 | -4.30952900 | 0.00729000  |
| N | 5.64815200  | -1.16308300 | 0.00861100  |
| N | 5.12812400  | -3.63377000 | 0.05408700  |

|                                                  |             |             |            |
|--------------------------------------------------|-------------|-------------|------------|
| N                                                | -1.93691200 | -5.97879900 | 0.05232500 |
| B                                                | 1.98144400  | 6.00396500  | 0.07767000 |
| B                                                | -5.17881600 | 3.62724300  | 0.07926300 |
| B                                                | 4.20923400  | -4.71785100 | 0.07970600 |
| B                                                | -0.55213000 | -6.29822000 | 0.07826600 |
| N                                                | -4.20973100 | 4.66675100  | 0.05400900 |
| N                                                | -1.81678700 | 5.47252000  | 0.00935900 |
| N                                                | 0.58309900  | 6.25759800  | 0.05266200 |
| H                                                | 4.59442300  | -5.84288300 | 0.11679300 |
| H                                                | 2.19999400  | -6.62725900 | 0.12817500 |
| H                                                | -0.18815600 | -7.43030700 | 0.11501100 |
| H                                                | 4.63977400  | 5.21885200  | 0.12607300 |
| H                                                | 6.52952300  | 3.55210700  | 0.11372100 |
| H                                                | 2.76302800  | 6.90021900  | 0.11392600 |
| H                                                | -6.34118900 | 3.87810200  | 0.11595900 |
| H                                                | -6.83986000 | 1.40830100  | 0.12764700 |
| H                                                | -7.35765000 | -1.05747500 | 0.11452300 |
| H                                                | 7.14157800  | 1.13230900  | 0.07489800 |
| H                                                | 6.63851600  | -1.36690300 | 0.03813000 |
| H                                                | 6.11299300  | -3.86173900 | 0.07726200 |
| H                                                | -2.58991200 | -6.75052200 | 0.07493400 |
| H                                                | -4.50316800 | -5.06518500 | 0.03637900 |
| H                                                | -6.40113300 | -3.36290300 | 0.07433200 |
| H                                                | -4.55161900 | 5.61811300  | 0.07690200 |
| H                                                | -2.13534800 | 6.43215800  | 0.03872000 |
| H                                                | 0.28834200  | 7.22460000  | 0.07550500 |
| Li <sup>+</sup> @Pristine <i>h</i> -BN (product) |             |             |            |
| Li                                               | -0.00081800 | 0.00166100  | 1.83017400 |

|   |             |             |             |
|---|-------------|-------------|-------------|
| B | 0.69435000  | -1.30122900 | 0.03447000  |
| B | 0.77974800  | 1.25181700  | 0.03384900  |
| B | -1.47398500 | 0.04925200  | 0.03380400  |
| B | 2.91961900  | -0.09746800 | 0.06761800  |
| B | 2.99168900  | 2.41552600  | -0.01847300 |
| B | 0.84825200  | 3.75036100  | -0.01595000 |
| B | -1.37522600 | 2.57715100  | 0.06991100  |
| B | -3.58777700 | 1.38317800  | -0.01458300 |
| B | -3.67208100 | -1.14051900 | -0.01819700 |
| B | -1.54428200 | -2.47961200 | 0.06689300  |
| B | 0.59610800  | -3.79868400 | -0.01365400 |
| B | 2.82391300  | -2.60978800 | -0.01306900 |
| N | 1.36563400  | -2.55914500 | -0.00495200 |
| N | 1.44164300  | -0.04825900 | 0.14520000  |
| N | 3.57784700  | -1.37505800 | 0.02774600  |
| N | -0.84950300 | -3.73772500 | 0.02661800  |
| N | -0.76264800 | -1.22448000 | 0.14511000  |
| N | -2.97982200 | -2.41092000 | 0.02363800  |
| N | -2.89895400 | 0.09684600  | -0.00750700 |
| N | -0.67910700 | 1.27254200  | 0.14636400  |
| N | -2.81217900 | 2.60431100  | 0.02959300  |
| N | -0.59800700 | 3.78590500  | 0.02857000  |
| N | 1.53326600  | 2.46204300  | -0.00782400 |
| N | 3.66156900  | 1.13322700  | 0.02442000  |
| B | 5.04033900  | -1.42672700 | -0.01119300 |
| B | 5.12425900  | 1.08749400  | -0.01545400 |
| B | -1.28431500 | 5.07839100  | -0.00842800 |
| B | -3.50374400 | 3.89398100  | -0.00712300 |



|   |             |             |             |
|---|-------------|-------------|-------------|
| B | -3.75593700 | -3.65139300 | -0.01694500 |
| B | -1.62056200 | -4.98135600 | -0.01314400 |
| N | 1.28572300  | -5.06662400 | -0.05530900 |
| N | 3.49329600  | -3.88852600 | -0.05461400 |
| N | 3.74483900  | 3.64654600  | -0.06416200 |
| N | 1.62092000  | 4.96924200  | -0.06097400 |
| N | -5.03059100 | 1.41979600  | -0.05842700 |
| N | -5.11413200 | -1.08090700 | -0.06305400 |
| B | 2.72841800  | -5.11252100 | -0.08126300 |
| B | 3.06334800  | 4.91888300  | -0.09123900 |
| B | -5.79167000 | 0.19353600  | -0.08901400 |
| B | 0.51949900  | -6.30130200 | -0.07493000 |
| B | 0.93893700  | 6.25243900  | -0.07882800 |
| N | -0.89935400 | -6.22028300 | -0.05212500 |
| N | -0.48207300 | 6.26629100  | -0.05025600 |
| N | -2.71481600 | 5.08722200  | -0.00250800 |
| N | -3.04846200 | -4.89472400 | -0.01262600 |
| N | -5.18583400 | -3.55065700 | -0.06028200 |
| N | -4.93725100 | 3.88884500  | -0.04737700 |
| B | 4.94560000  | -3.93927800 | -0.07339900 |
| B | 5.19724300  | 3.60053200  | -0.08551800 |
| B | -5.88431800 | -2.31304500 | -0.08512800 |
| B | -5.71680900 | 2.70072700  | -0.07541500 |
| N | 5.83653200  | 2.33136000  | -0.05916000 |
| N | 5.76323800  | -0.19235300 | -0.01020800 |
| N | 5.66808900  | -2.71551000 | -0.04995100 |
| H | -7.07306600 | -2.28433300 | -0.12339600 |
| H | -6.97911000 | 0.23345300  | -0.13085800 |

|   |             |             |             |
|---|-------------|-------------|-------------|
| H | -6.90484000 | 2.75181500  | -0.11234100 |
| H | 3.28795000  | -6.16077800 | -0.11989200 |
| H | 1.06948700  | -7.35568100 | -0.10993600 |
| H | 5.51545700  | -4.98307500 | -0.10821300 |
| H | 5.83520800  | 4.60396600  | -0.12436200 |
| H | 3.69139400  | 5.92742400  | -0.13358100 |
| H | 1.55805100  | 7.26766700  | -0.11666600 |
| H | -1.41253500 | -7.09125400 | -0.07556700 |
| H | -3.58303000 | -5.75295600 | -0.04297700 |
| H | -5.74110200 | -4.39539100 | -0.08466200 |
| H | -5.43498200 | 4.76880500  | -0.06878600 |
| H | -3.19097100 | 5.97926400  | -0.03054500 |
| H | -0.93607600 | 7.16956400  | -0.07205500 |
| H | 6.84738500  | 2.32218700  | -0.08334200 |
| H | 6.77377900  | -0.22630500 | -0.04022700 |
| H | 6.67731900  | -2.77413300 | -0.07270100 |

Na<sup>+</sup>@ Pristine *h*-BN

|    |             |             |             |
|----|-------------|-------------|-------------|
| Na | -0.79754900 | -0.15222300 | 0.32559400  |
| B  | -2.48507500 | 0.47031400  | 1.74419000  |
| B  | 0.60435900  | -1.73451600 | -0.64718900 |
| B  | 1.35864200  | 0.86340700  | -0.69417700 |
| B  | -2.89594500 | -1.48647100 | 0.86305700  |
| B  | -1.25972100 | -3.51218700 | 0.19279300  |
| B  | 1.39617200  | -3.59184200 | 0.05178100  |
| B  | 2.72122700  | -1.42787200 | -0.45689000 |
| B  | 3.89699300  | 0.78449200  | -0.44530000 |
| B  | 2.58128900  | 2.91790200  | -0.21955100 |
| B  | 0.05474200  | 2.78884800  | -0.11133100 |

|   |             |             |             |
|---|-------------|-------------|-------------|
| B | -2.55876600 | 2.85136100  | 0.39802900  |
| B | -3.99445400 | 0.71188900  | 0.18013700  |
| N | -2.87788900 | 1.45756000  | 0.89013300  |
| N | -2.21068100 | -0.79838800 | 1.94654600  |
| N | -3.95952400 | -0.73526800 | 0.17202000  |
| N | -1.24396000 | 3.44342500  | 0.29128400  |
| N | 0.11990100  | 1.46204300  | -0.60786100 |
| N | 1.30432200  | 3.56479300  | -0.00534000 |
| N | 2.64158400  | 1.48473400  | -0.50775000 |
| N | 1.43453200  | -0.71069900 | -0.80218300 |
| N | 3.91752600  | -0.68660600 | -0.41905900 |
| N | 2.62516000  | -2.85221700 | -0.13952100 |
| N | 0.06201900  | -2.84128600 | -0.11881200 |
| N | -2.51836300 | -2.80540600 | 0.30594000  |
| B | -5.00283800 | -1.45379800 | -0.54451900 |
| B | -3.70173900 | -3.57919400 | -0.15900200 |
| B | 3.90019700  | -3.57322500 | 0.05969700  |
| B | 5.17725000  | -1.40362200 | -0.22459900 |
| B | 1.28872900  | 4.98855000  | 0.26551600  |
| B | -1.22794700 | 4.91729800  | 0.35076400  |
| N | -3.75966800 | 3.57796400  | 0.01361800  |
| N | -5.01094600 | 1.46148600  | -0.48042300 |
| N | -1.17983800 | -4.94845600 | 0.26133600  |
| N | 1.33851500  | -4.97727300 | 0.35218500  |
| N | 5.13523600  | 1.51254800  | -0.32846600 |
| N | 3.83465900  | 3.64845900  | -0.11073700 |
| B | -4.95722300 | 2.91387100  | -0.42945400 |
| B | 0.06616400  | -5.66974800 | 0.39595700  |

|   |             |             |             |
|---|-------------|-------------|-------------|
| B | 5.09494100  | 2.96107400  | -0.20292100 |
| B | -3.71409500 | 5.03369200  | 0.01486400  |
| B | 2.60359500  | -5.69843300 | 0.50799300  |
| N | -2.47552000 | 5.64145500  | 0.31576900  |
| N | 3.81600100  | -4.97595700 | 0.36131700  |
| N | 5.11401300  | -2.83396900 | -0.04634200 |
| N | 0.01360500  | 5.62085900  | 0.41613000  |
| N | 2.53706800  | 5.70076700  | 0.33114600  |
| N | 6.37769400  | -0.63322900 | -0.20695500 |
| B | -6.09374800 | 0.73960800  | -1.13134800 |
| B | -2.41287700 | -5.72085200 | 0.11405400  |
| B | 3.80053100  | 5.07743800  | 0.15294000  |
| B | 6.39221200  | 0.79864300  | -0.24917200 |
| N | -3.59837600 | -5.01131700 | -0.19239200 |
| N | -4.88932600 | -2.88540100 | -0.55281500 |
| N | -6.05262200 | -0.68768400 | -1.14746600 |
| H | 4.80919200  | 5.70656200  | 0.22479200  |
| H | 6.11646900  | 3.56770900  | -0.14170900 |
| H | 7.42629700  | 1.38439100  | -0.19733000 |
| H | -5.89386500 | 3.54658300  | -0.79563200 |
| H | -4.69250500 | 5.67267300  | -0.20773500 |
| H | -6.98858200 | 1.32918900  | -1.64610700 |
| H | -2.39529300 | -6.90578200 | 0.19004900  |
| H | 0.05204900  | -6.84744700 | 0.53792600  |
| H | 2.59904800  | -6.86062200 | 0.75158000  |
| H | -2.44675100 | 6.65187300  | 0.34339800  |
| H | -0.01893400 | 6.62763400  | 0.50662000  |
| H | 2.53217600  | 6.69475300  | 0.51615500  |

|   |             |             |             |
|---|-------------|-------------|-------------|
| H | 7.27163900  | -1.09652000 | -0.11333100 |
| H | 5.98527200  | -3.33071300 | 0.08974800  |
| H | 4.67320100  | -5.49824400 | 0.48932300  |
| H | -4.42690900 | -5.55565000 | -0.39381600 |
| H | -5.65057000 | -3.43414000 | -0.93105000 |
| H | -6.80784100 | -1.16150000 | -1.62510900 |

Na<sup>+</sup>@ Pristine *h*-BN (reactant)

|    |             |             |             |
|----|-------------|-------------|-------------|
| Na | 0.00002300  | 0.00008700  | 0.00026000  |
| B  | 0.00001200  | 0.00000000  | 2.39210515  |
| B  | 1.82389622  | 0.00000000  | -1.62174487 |
| B  | 0.51122333  | 2.36041451  | -1.38312304 |
| B  | 0.51260753  | -1.91370573 | 1.41616946  |
| B  | 2.31900908  | -2.41569674 | -0.51230258 |
| B  | 3.74139083  | -0.75368835 | -2.01727744 |
| B  | 2.82116831  | 1.62290301  | -2.52324375 |
| B  | 2.07428720  | 4.01437285  | -2.52970858 |
| B  | 0.12787348  | 4.74744466  | -1.10875710 |
| B  | -1.12500576 | 3.00490620  | 0.23433702  |
| B  | -2.32198083 | 1.40321710  | 1.99152627  |
| B  | -1.86486224 | -1.14937433 | 1.99985038  |
| N  | -1.33214620 | 0.26141409  | 2.17505653  |
| N  | 1.03522009  | -0.72633428 | 2.06811256  |
| N  | -0.93263134 | -2.18743309 | 1.58846476  |
| N  | -2.03933150 | 2.68686112  | 1.39739152  |
| N  | -0.53267325 | 2.00776646  | -0.56382392 |
| N  | -0.86951940 | 4.41616022  | -0.10897584 |
| N  | 0.91955662  | 3.68637617  | -1.73779686 |
| N  | 1.48314375  | 1.24333929  | -1.93476515 |

|   |             |             |             |
|---|-------------|-------------|-------------|
| N | 3.02426653  | 2.95922727  | -2.91587981 |
| N | 3.83365549  | 0.56806279  | -2.61265168 |
| N | 2.46008835  | -1.11362777 | -1.24890802 |
| N | 1.23148808  | -2.72108526 | 0.40162034  |
| B | -1.45720613 | -3.52113993 | 1.32345007  |
| B | 0.79864251  | -4.14836441 | 0.40271033  |
| B | 5.09480860  | 0.92031663  | -3.29670556 |
| B | 4.26804549  | 3.30219475  | -3.60069331 |
| B | -1.63962970 | 5.48378202  | 0.49159326  |
| B | -2.92729235 | 3.77567794  | 1.82251552  |
| N | -3.64670873 | 1.06195673  | 2.48945407  |
| N | -3.25383436 | -1.39333413 | 2.16538237  |
| N | 3.28745695  | -3.40707502 | -0.89844002 |
| N | 4.74057308  | -1.75138527 | -2.12218847 |
| N | 2.35202677  | 5.38266865  | -2.88257320 |
| N | 0.40796203  | 6.12617278  | -1.47522505 |
| B | -4.12482798 | -0.28772674 | 2.55661102  |
| B | 4.50188218  | -3.09066046 | -1.62250530 |
| B | 1.48467785  | 6.43363226  | -2.37385505 |
| B | -4.54709391 | 2.15079792  | 2.84316999  |
| B | 5.97260235  | -1.41002584 | -2.84602990 |
| N | -4.09310159 | 3.47020193  | 2.61635337  |
| N | 6.09481246  | -0.10611881 | -3.38597792 |
| N | 5.23329995  | 2.24913490  | -3.80321687 |
| N | -2.66103671 | 5.12562846  | 1.42691921  |
| N | -1.36669412 | 6.84411240  | 0.08963063  |
| N | 4.45165892  | 4.66140686  | -3.99275331 |
| B | -3.76210823 | -2.74754149 | 1.98258170  |

|   |             |             |             |
|---|-------------|-------------|-------------|
| B | 3.00856010  | -4.81447347 | -0.60785646 |
| B | -0.37573172 | 7.18529904  | -0.86397123 |
| B | 3.53312300  | 5.70714574  | -3.65367745 |
| N | 1.73693087  | -5.13071421 | -0.06408231 |
| N | -0.50376133 | -4.49322426 | 0.86643330  |
| N | -2.84778332 | -3.75991251 | 1.55934669  |
| H | -0.18259099 | 8.32286518  | -1.15729652 |
| H | 1.69327468  | 7.56487198  | -2.69772061 |
| H | 3.75665602  | 6.82642712  | -3.98787123 |
| H | -5.23885835 | -0.51710184 | 2.89484017  |
| H | -5.60946729 | 1.92007234  | 3.33113687  |
| H | -4.90783912 | -2.99695264 | 2.16474159  |
| H | 3.80360133  | -5.65430640 | -0.87565991 |
| H | 5.30721449  | -3.93588224 | -1.82397550 |
| H | 6.84054642  | -2.21273323 | -2.95719575 |
| H | -4.70734217 | 4.22459710  | 2.89101755  |
| H | -3.26842848 | 5.85242378  | 1.77972094  |
| H | -1.89907751 | 7.59643833  | 0.50229627  |
| H | 5.28288103  | 4.93071442  | -4.50051623 |
| H | 6.09640096  | 2.48648004  | -4.27357312 |
| H | 6.96955478  | 0.10774836  | -3.86042242 |
| H | 1.51073963  | -6.11238199 | 0.04255636  |
| H | -0.79137756 | -5.45941465 | 0.79479105  |
| H | -3.22935647 | -4.69001858 | 1.42135834  |

Na<sup>+</sup>@ Pristine *h*-BN (Product)

|    |             |             |             |
|----|-------------|-------------|-------------|
| Na | -0.01512100 | 0.00985800  | 2.29969700  |
| B  | -0.82812200 | -1.20947600 | -0.00299900 |
| B  | 1.46205800  | -0.11368700 | -0.00152700 |

|   |             |             |             |
|---|-------------|-------------|-------------|
| B | -0.63195400 | 1.32204300  | -0.00408900 |
| B | 1.25971000  | -2.63229000 | -0.00143200 |
| B | 3.52227000  | -1.53828400 | -0.06116900 |
| B | 3.71728200  | 0.97647900  | -0.05916700 |
| B | 1.65030500  | 2.40618600  | 0.00003900  |
| B | -0.42839100 | 3.81861500  | -0.06366600 |
| B | -2.70387300 | 2.73003500  | -0.06396900 |
| B | -2.90858000 | 0.22527500  | -0.00054300 |
| B | -3.09244000 | -2.28113900 | -0.05980100 |
| B | -1.01192700 | -3.70742100 | -0.06158900 |
| N | -1.63856900 | -2.39107000 | -0.03449700 |
| N | 0.62524200  | -1.30633000 | 0.07934600  |
| N | 0.43146600  | -3.80991100 | -0.03628100 |
| N | -3.70828800 | -0.97182700 | -0.03303800 |
| N | -1.44263300 | 0.11153600  | 0.07910000  |
| N | -3.51420300 | 1.53123300  | -0.03574500 |
| N | -1.25044100 | 2.61437200  | -0.03704800 |
| N | 0.81892000  | 1.19363900  | 0.07990400  |
| N | 1.01344100  | 3.69724400  | -0.03518300 |
| N | 3.08423100  | 2.27760300  | -0.03245000 |
| N | 2.89055400  | -0.22441400 | -0.03388300 |
| N | 2.69632200  | -2.72647000 | -0.03568600 |
| B | 1.05979400  | -5.12926100 | -0.08610900 |
| B | 3.32937400  | -4.04354200 | -0.08581200 |
| B | 3.91279900  | 3.48155000  | -0.08026300 |
| B | 1.83769600  | 4.90416200  | -0.08337700 |
| B | -4.97123400 | 1.64690600  | -0.08365600 |
| B | -5.16570400 | -0.86137700 | -0.08079100 |



|   |             |             |             |
|---|-------------|-------------|-------------|
| N | -3.90082200 | -3.47891300 | -0.10297800 |
| N | -1.83782200 | -4.89325100 | -0.10511400 |
| N | 4.96387500  | -1.63951400 | -0.10468600 |
| N | 5.15722500  | 0.85423200  | -0.10211400 |
| N | -1.06157600 | 5.11737000  | -0.10915200 |
| N | -3.31791500 | 4.03794100  | -0.10928000 |
| B | -3.27626700 | -4.77964400 | -0.12873300 |
| B | 5.77811800  | -0.44824900 | -0.12826600 |
| B | -2.50033700 | 5.22693900  | -0.13531400 |
| B | -5.34907700 | -3.36881200 | -0.13352100 |
| B | 5.98032300  | 2.05092200  | -0.13265200 |
| N | -5.93300800 | -2.07301400 | -0.11861100 |
| N | 5.33773600  | 3.31866500  | -0.11789100 |
| N | 3.26100700  | 4.75553400  | -0.08578400 |
| N | -5.74865200 | 0.44546900  | -0.08615600 |
| N | -5.54255600 | 2.96223600  | -0.12428300 |
| N | 1.17198000  | 6.17441200  | -0.12442600 |
| B | -1.21302900 | -6.20434300 | -0.13824500 |
| B | 5.59266700  | -2.94867100 | -0.13803500 |
| B | -4.76585100 | 4.15253000  | -0.14092100 |
| B | -0.24217300 | 6.31665100  | -0.14111600 |
| N | 4.76234900  | -4.10225100 | -0.12501200 |
| N | 2.48897800  | -5.20186400 | -0.09152900 |
| N | 0.20615200  | -6.28177300 | -0.12521600 |
| H | -5.28902300 | 5.22069200  | -0.17926500 |
| H | -3.01325700 | 6.29909400  | -0.17492300 |
| H | -0.74558900 | 7.39427400  | -0.17961000 |
| H | -3.94858300 | -5.75981700 | -0.16661200 |

|   |             |             |             |
|---|-------------|-------------|-------------|
| H | -6.03087000 | -4.34350600 | -0.16983100 |
| H | -1.87662200 | -7.19150500 | -0.17477600 |
| H | 6.77767000  | -3.05154600 | -0.17497900 |
| H | 6.96315800  | -0.53990100 | -0.16623500 |
| H | 7.16705500  | 1.97019000  | -0.16888600 |
| H | -6.94226800 | -2.01980000 | -0.14956600 |
| H | -6.75643500 | 0.52344600  | -0.12422600 |
| H | -6.54795300 | 3.06501400  | -0.15581000 |
| H | 1.72293600  | 7.02165500  | -0.15611800 |
| H | 3.83271300  | 5.58911100  | -0.12401100 |
| H | 5.92958600  | 4.13792200  | -0.14878300 |
| H | 5.22076900  | -5.00290600 | -0.15753200 |
| H | 2.92517000  | -6.11364800 | -0.13059200 |
| H | 0.61972000  | -7.20389500 | -0.15741200 |

Na@ V<sub>B</sub> *h*-BN

|    |             |             |             |
|----|-------------|-------------|-------------|
| Na | -1.67287500 | -0.11659700 | 0.30488300  |
| B  | 0.97706700  | -1.20438800 | 0.27672900  |
| B  | 0.67487300  | 1.35109700  | -0.16108200 |
| B  | -1.07695600 | -2.65388800 | 0.50706400  |
| B  | 1.20248600  | -3.67172200 | 0.08535700  |
| B  | 3.24816700  | -2.19095300 | -0.08835000 |
| B  | 2.94440000  | 0.31786200  | -0.03081200 |
| B  | 2.68144700  | 2.83011700  | 0.03980200  |
| B  | 0.35706400  | 3.82805900  | 0.02068900  |
| B  | -1.67579700 | 2.33382100  | -0.15452500 |
| B  | -3.94223100 | 0.82739000  | 0.28839900  |
| B  | -3.65953700 | -1.63087900 | 0.49935600  |
| N  | -3.50841200 | -0.31232000 | 1.01734700  |

|   |             |             |             |
|---|-------------|-------------|-------------|
| N | -0.30664300 | -1.48815300 | 0.78445400  |
| N | -2.59487200 | -2.71301500 | 0.45013900  |
| N | -3.14237100 | 2.08604400  | 0.01955200  |
| N | -0.69100400 | 1.37204900  | -0.55233200 |
| N | -1.09308200 | 3.67055800  | -0.02429200 |
| N | 1.24830200  | 2.68353500  | -0.00565700 |
| N | 1.50157600  | 0.15400600  | 0.01722500  |
| N | 3.52420800  | 1.65333500  | -0.02290900 |
| N | 3.80749400  | -0.85195200 | -0.08559800 |
| N | 1.83079800  | -2.36340200 | 0.07063400  |
| N | -0.24307400 | -3.82950000 | 0.22553600  |
| B | -3.12689400 | -4.04939400 | 0.12734700  |
| B | -0.83538000 | -5.13871700 | 0.10435500  |
| B | 5.24699600  | -0.68644600 | -0.17015800 |
| B | 4.96734400  | 1.81357800  | -0.04208800 |
| B | -1.96419500 | 4.82640000  | -0.02403700 |
| B | -3.97224700 | 3.28045600  | -0.17640400 |
| N | -5.30497100 | 0.68372300  | -0.25353400 |
| N | -4.99466400 | -1.83222000 | -0.11280700 |
| N | 2.05322900  | -4.84122400 | -0.09528700 |
| N | 4.09223900  | -3.36811600 | -0.22252900 |
| N | 3.24812900  | 4.16824000  | 0.12227400  |
| N | 0.93519700  | 5.15903600  | 0.12887300  |
| B | -5.81244600 | -0.66845100 | -0.39996300 |
| B | 3.48483300  | -4.67904200 | -0.23045300 |
| B | 2.37322000  | 5.31535900  | 0.17525500  |
| B | -6.05282500 | 1.87563900  | -0.56000700 |
| B | 5.52513700  | -3.19266300 | -0.32424200 |

|   |             |             |             |
|---|-------------|-------------|-------------|
| N | -5.39080100 | 3.12754700  | -0.40484200 |
| N | 6.05913900  | -1.87235000 | -0.28561600 |
| N | 5.79099700  | 0.64192600  | -0.13278900 |
| N | -3.37099300 | 4.59079700  | -0.15728100 |
| N | -1.35104400 | 6.12503800  | 0.08384700  |
| N | 5.50003300  | 3.15198300  | 0.02971100  |
| B | -5.45695900 | -3.17159300 | -0.36370400 |
| B | 1.45037400  | -6.15938500 | -0.13982000 |
| B | 0.05939200  | 6.31440900  | 0.16203500  |
| B | 4.68891400  | 4.31809900  | 0.12061300  |
| N | 0.03478800  | -6.27782300 | -0.04198800 |
| N | -2.26493500 | -5.20292900 | 0.10040600  |
| N | -4.53112200 | -4.22848200 | -0.15592700 |
| H | 0.51117100  | 7.41548900  | 0.24715400  |
| H | 2.84125400  | 6.40951500  | 0.25126700  |
| H | 5.19050900  | 5.39881700  | 0.18904600  |
| H | -6.91518900 | -0.82528600 | -0.82926500 |
| H | -7.19149100 | 1.82375600  | -0.91509000 |
| H | -6.57046300 | -3.39361500 | -0.73246500 |
| H | 2.12763000  | -7.13400400 | -0.26575300 |
| H | 4.17528600  | -5.64430600 | -0.35014000 |
| H | 6.25146100  | -4.13341300 | -0.43418000 |
| H | -5.93346900 | 3.96038400  | -0.58919100 |
| H | -3.98933500 | 5.38776800  | -0.23059500 |
| H | -1.93210100 | 6.95184300  | 0.10259000  |
| H | 6.50202900  | 3.28444800  | 0.02540100  |
| H | 6.79500500  | 0.75634400  | -0.16828500 |
| H | 7.06322600  | -1.77760100 | -0.35160500 |

|   |             |             |             |
|---|-------------|-------------|-------------|
| H | -0.36006200 | -7.20650100 | -0.09775700 |
| H | -2.70492900 | -6.10193100 | -0.04642000 |
| H | -4.85714000 | -5.16726100 | -0.34148700 |

Na@ V<sub>B</sub> *h*-BN (reactant)

|    |             |             |             |
|----|-------------|-------------|-------------|
| Na | -1.35933800 | -0.63862300 | -2.12920800 |
| B  | 1.33354800  | -0.79769800 | -0.30377400 |
| B  | 0.11166300  | 1.36261100  | -0.13453900 |
| B  | -0.09598600 | -2.79798700 | -0.23906300 |
| B  | 2.42596000  | -2.99925300 | 0.00667800  |
| B  | 3.81871500  | -0.90888300 | 0.02015100  |
| B  | 2.64373800  | 1.30928800  | -0.05242000 |
| B  | 1.46288500  | 3.50756300  | -0.01394600 |
| B  | -1.04535300 | 3.61476000  | 0.02343300  |
| B  | -2.44330300 | 1.48923700  | -0.02877100 |
| B  | -3.90864600 | -0.53079300 | -0.10927800 |
| B  | -2.67761100 | -2.66475300 | -0.14928600 |
| N  | -2.79988800 | -1.29049800 | -0.51785500 |
| N  | 0.12744100  | -1.43969400 | -0.63297100 |
| N  | -1.42172400 | -3.42531400 | -0.14248700 |
| N  | -3.76750600 | 0.90653600  | 0.03507300  |
| N  | -1.20319100 | 0.76729100  | -0.19109400 |
| N  | -2.33454300 | 2.95803800  | 0.04959200  |
| N  | 0.17149300  | 2.83394600  | -0.05741700 |
| N  | 1.36654500  | 0.64713100  | -0.16857700 |
| N  | 2.69529000  | 2.75379500  | -0.00627000 |
| N  | 3.87166400  | 0.53609600  | 0.00592500  |
| N  | 2.54892400  | -1.56740900 | -0.10754400 |
| N  | 1.11569800  | -3.61587700 | -0.01022300 |

|   |             |             |            |
|---|-------------|-------------|------------|
| B | -1.48630000 | -4.86463100 | 0.10339400 |
| B | 1.02117300  | -5.04854400 | 0.15482500 |
| B | 5.15347200  | 1.20425500  | 0.10128700 |
| B | 3.98034800  | 3.42695800  | 0.05907700 |
| B | -3.54052500 | 3.76380100  | 0.20010200 |
| B | -4.95595200 | 1.70396600  | 0.24740400 |
| N | -5.19483500 | -1.18041900 | 0.15921300 |
| N | -3.95712500 | -3.35768100 | 0.15868700 |
| N | 3.63858400  | -3.79443900 | 0.17587400 |
| N | 5.02944900  | -1.70553600 | 0.16051400 |
| N | 1.52230600  | 4.96386300  | 0.03357800 |
| N | -0.96556300 | 5.07219800  | 0.08659400 |
| B | -5.18971400 | -2.61565600 | 0.26742400 |
| B | 4.92563000  | -3.14363200 | 0.23000900 |
| B | 0.31021800  | 5.73375500  | 0.07425700 |
| B | -6.37027200 | -0.37815400 | 0.38545200 |
| B | 6.30773100  | -1.03398800 | 0.23957100 |
| N | -6.22835500 | 1.03861300  | 0.38305400 |
| N | 6.33940200  | 0.38938300  | 0.19478400 |
| N | 5.17800800  | 2.63859500  | 0.10197800 |
| N | -4.81599800 | 3.12635000  | 0.30286700 |
| N | -3.41478400 | 5.19773700  | 0.24907600 |
| N | 3.99161100  | 4.86620700  | 0.08029700 |
| B | -3.99087000 | -4.78960500 | 0.31784300 |
| B | 3.52906600  | -5.23066700 | 0.30903600 |
| B | -2.16758200 | 5.86703200  | 0.18977400 |
| B | 2.80135400  | 5.64057100  | 0.07094100 |
| N | 2.23462500  | -5.81747000 | 0.29299400 |

|   |             |             |            |
|---|-------------|-------------|------------|
| N | -0.28102100 | -5.63797900 | 0.17771100 |
| N | -2.76657900 | -5.50305600 | 0.25865300 |
| H | -2.11372700 | 7.05858100  | 0.23017100 |
| H | 0.36243600  | 6.92466200  | 0.10659500 |
| H | 2.85671700  | 6.83261800  | 0.09747400 |
| H | -6.21187000 | -3.19425200 | 0.48228700 |
| H | -7.43765000 | -0.88196600 | 0.57085500 |
| H | -5.02034500 | -5.36791600 | 0.49755300 |
| H | 4.50195900  | -5.91170300 | 0.43335500 |
| H | 5.91536800  | -3.80084200 | 0.34196100 |
| H | 7.32178400  | -1.65618500 | 0.34101100 |
| H | -7.05779600 | 1.59391200  | 0.54026600 |
| H | -5.63757300 | 3.69946900  | 0.43668100 |
| H | -4.24981100 | 5.75967800  | 0.33824600 |
| H | 4.87327800  | 5.35846300  | 0.11599900 |
| H | 6.06868000  | 3.11270400  | 0.16395700 |
| H | 7.24340400  | 0.83667400  | 0.25781200 |
| H | 2.17362900  | -6.82102100 | 0.39545400 |
| H | -0.36365200 | -6.63489400 | 0.32419700 |
| H | -2.79851200 | -6.50373800 | 0.39533300 |

Na@ V<sub>B</sub> *h*-BN (product)

|    |             |             |             |
|----|-------------|-------------|-------------|
| Na | 1.35940200  | 0.63974500  | 2.12877800  |
| B  | -1.33423900 | 0.79654700  | 0.30365400  |
| B  | -0.11035000 | -1.36272900 | 0.13464400  |
| B  | 0.09339300  | 2.79815600  | 0.23971500  |
| B  | -2.42866100 | 2.99719000  | -0.00622800 |
| B  | -3.81943500 | 0.90551700  | -0.02088300 |
| B  | -2.64244700 | -1.31157200 | 0.05178400  |

|   |             |             |             |
|---|-------------|-------------|-------------|
| B | -1.45970000 | -3.50886300 | 0.01423900  |
| B | 1.04861700  | -3.61397500 | -0.02245500 |
| B | 2.44462400  | -1.48726100 | 0.02890300  |
| B | 3.90808100  | 0.53417700  | 0.10817200  |
| B | 2.67503800  | 2.66710000  | 0.14879100  |
| N | 2.79872900  | 1.29289500  | 0.51703600  |
| N | -0.12881800 | 1.43961000  | 0.63336100  |
| N | 1.41856500  | 3.42665800  | 0.14292100  |
| N | 3.76825800  | -0.90331600 | -0.03557600 |
| N | 1.20398600  | -0.76623400 | 0.19137700  |
| N | 2.33724900  | -2.95612500 | -0.04886700 |
| N | -0.16889400 | -2.83412600 | 0.05798300  |
| N | -1.36585200 | -0.64828800 | 0.16816700  |
| N | -2.69272800 | -2.75615000 | 0.00586500  |
| N | -3.87105500 | -0.53950100 | -0.00694400 |
| N | -2.55028200 | 1.56517500  | 0.10727500  |
| N | -1.11901900 | 3.61507700  | 0.01124500  |
| B | 1.48184000  | 4.86614200  | -0.10236800 |
| B | -1.02579300 | 5.04788500  | -0.15313500 |
| B | -5.15224600 | -1.20880500 | -0.10267100 |
| B | -3.97717100 | -3.43045400 | -0.05980700 |
| B | 3.54394800  | -3.76083200 | -0.19926800 |
| B | 4.95738700  | -1.69966900 | -0.24802200 |
| N | 5.19349000  | 1.18497100  | -0.16103200 |
| N | 3.95382700  | 3.36112600  | -0.15979100 |
| N | -3.64200800 | 3.79131400  | -0.17528000 |
| N | -5.03088500 | 1.70108600  | -0.16135400 |
| N | -1.51782200 | -4.96523300 | -0.03282200 |



|   |             |             |             |
|---|-------------|-------------|-------------|
| N | 0.97014200  | -5.07147500 | -0.08501500 |
| B | 5.18700100  | 2.62020100  | -0.26927900 |
| B | -4.92840900 | 3.13929600  | -0.23021000 |
| B | -0.30508600 | -5.73412100 | -0.07277400 |
| B | 6.36961400  | 0.38375900  | -0.38750100 |
| B | -6.30852300 | 1.02838500  | -0.24093300 |
| N | 6.22908900  | -1.03313700 | -0.38449200 |
| N | -6.33889300 | -0.39502400 | -0.19648400 |
| N | -5.17550500 | -2.64316200 | -0.10334600 |
| N | 4.81878600  | -3.12223000 | -0.30272600 |
| N | 3.41948300  | -5.19491000 | -0.24746100 |
| N | -3.98718500 | -4.86972100 | -0.08063900 |
| B | 3.98632500  | 4.79314400  | -0.31839500 |
| B | -3.53382200 | 5.22771300  | -0.30757600 |
| B | 2.17288000  | -5.86528500 | -0.18779500 |
| B | -2.79627600 | -5.64305900 | -0.07050400 |
| N | -2.23994500 | 5.81576400  | -0.29097000 |
| N | 0.27588100  | 5.63850600  | -0.17577000 |
| N | 2.76153600  | 5.50563400  | -0.25795500 |
| H | 2.12008000  | -7.05690000 | -0.22761300 |
| H | -0.35627500 | -6.92508500 | -0.10461300 |
| H | -2.85061200 | -6.83516400 | -0.09662700 |
| H | 6.20850100  | 3.19967300  | -0.48488700 |
| H | 7.43641500  | 0.88855400  | -0.57354800 |
| H | 5.01521400  | 5.37233200  | -0.49864000 |
| H | -4.50732800 | 5.90790000  | -0.43178000 |
| H | -5.91874000 | 3.79563400  | -0.34206200 |
| H | -7.32311700 | 1.64965900  | -0.34261100 |

|   |             |             |             |
|---|-------------|-------------|-------------|
| H | 7.05900300  | -1.58769400 | -0.54182200 |
| H | 5.64086100  | -3.69464400 | -0.43649700 |
| H | 4.25500200  | -5.75615000 | -0.33644300 |
| H | -4.86842000 | -5.36273300 | -0.11654800 |
| H | -6.06574400 | -3.11805600 | -0.16553300 |
| H | -7.24246100 | -0.84313700 | -0.25987500 |
| H | -2.17990100 | 6.81942200  | -0.39292100 |
| H | 0.35760100  | 6.63556700  | -0.32177800 |
| H | 2.79264400  | 6.50640100  | -0.39419900 |

Na<sup>+</sup>@ V<sub>B</sub> *h*-BN

|    |             |             |             |
|----|-------------|-------------|-------------|
| Na | -1.50254700 | -0.06118300 | -0.77491900 |
| B  | 0.88929600  | -1.30928200 | -0.57927200 |
| B  | 0.78909800  | 1.36496500  | -0.57309200 |
| B  | -1.31637600 | -2.68369900 | -0.47449600 |
| B  | 0.91518200  | -3.77006700 | -0.02703500 |
| B  | 3.05550500  | -2.41735200 | -0.03345100 |
| B  | 2.91988900  | 0.10482300  | -0.21320900 |
| B  | 2.87091000  | 2.63072400  | -0.04137500 |
| B  | 0.63791900  | 3.82450400  | -0.02673800 |
| B  | -1.51242100 | 2.57926100  | -0.46008300 |
| B  | -3.81772100 | 1.16365700  | -0.34778000 |
| B  | -3.72185800 | -1.43166700 | -0.35549800 |
| N  | -3.50212300 | -0.12170600 | -0.92199300 |
| N  | -0.41196500 | -1.71788100 | -1.06723100 |
| N  | -2.78519600 | -2.57228500 | -0.28361200 |
| N  | -2.96824200 | 2.36816400  | -0.26820800 |
| N  | -0.54345700 | 1.67724800  | -1.04793400 |
| N  | -0.82446300 | 3.79140200  | -0.08214800 |

|   |             |             |             |
|---|-------------|-------------|-------------|
| N | 1.42696000  | 2.60414200  | -0.19677000 |
| N | 1.45169300  | 0.05092200  | -0.48675600 |
| N | 3.59488600  | 1.38261400  | -0.09198600 |
| N | 3.68642200  | -1.11979000 | -0.08623600 |
| N | 1.61475900  | -2.49636800 | -0.19595600 |
| N | -0.54550900 | -3.84182500 | -0.08841500 |
| B | -3.43267000 | -3.85240300 | 0.12077300  |
| B | -1.22857300 | -5.09422400 | 0.20207400  |
| B | 5.14319900  | -1.06558500 | 0.05620400  |
| B | 5.05211800  | 1.43489800  | 0.04806200  |
| B | -1.59541700 | 4.99243500  | 0.20721200  |
| B | -3.70601900 | 3.59798200  | 0.13283100  |
| N | -5.17933500 | 1.08569800  | 0.17308100  |
| N | -5.08451300 | -1.45427400 | 0.16834000  |
| N | 1.67534400  | -4.96036900 | 0.25878700  |
| N | 3.80235800  | -3.63511300 | 0.18920100  |
| N | 3.52803600  | 3.90042300  | 0.17412500  |
| N | 1.31098300  | 5.06755800  | 0.25319000  |
| B | -5.80458300 | -0.20987900 | 0.38359100  |
| B | 3.12158400  | -4.89704900 | 0.32896800  |
| B | 2.75818400  | 5.10965200  | 0.31603900  |
| B | -5.86822300 | 2.32490200  | 0.48938900  |
| B | 5.25055100  | -3.57178600 | 0.28529800  |
| N | -5.11761900 | 3.52177700  | 0.39698300  |
| N | 5.86795900  | -2.29763800 | 0.19444100  |
| N | 5.78283900  | 0.20963700  | 0.06558200  |
| N | -3.01744300 | 4.84538400  | 0.25217700  |
| N | -0.88226800 | 6.20782400  | 0.44860800  |

|   |             |             |            |
|---|-------------|-------------|------------|
| N | 5.68575600  | 2.71711400  | 0.17661800 |
| B | -5.68142100 | -2.74074500 | 0.48198900 |
| B | 0.99385500  | -6.22609400 | 0.47462900 |
| B | 0.54098600  | 6.28144400  | 0.46917800 |
| B | 4.97746800  | 3.94312400  | 0.26447600 |
| N | -0.43105900 | -6.25503100 | 0.44845200 |
| N | -2.65742900 | -5.04779500 | 0.24185900 |
| N | -4.84580300 | -3.87931100 | 0.38521400 |
| H | 1.08871000  | 7.31749100  | 0.67110800 |
| H | 3.30823900  | 6.14780700  | 0.49674000 |
| H | 5.54896300  | 4.97604500  | 0.41224200 |
| H | -6.91483200 | -0.25180400 | 0.80333100 |
| H | -7.00845300 | 2.32152500  | 0.82514500 |
| H | -6.81843600 | -2.82128000 | 0.81883100 |
| H | 1.61374700  | -7.21966600 | 0.68124200 |
| H | 3.74466900  | -5.89229700 | 0.51392900 |
| H | 5.89531700  | -4.55963600 | 0.43957600 |
| H | -5.59895500 | 4.37983800  | 0.63281700 |
| H | -3.57275000 | 5.65837100  | 0.48598400 |
| H | -1.39208100 | 7.06322900  | 0.62475500 |
| H | 6.69333400  | 2.75824600  | 0.25146800 |
| H | 6.78841400  | 0.24666100  | 0.16645000 |
| H | 6.87564000  | -2.26500400 | 0.27215400 |
| H | -0.87869500 | -7.14445600 | 0.62508100 |
| H | -3.15500300 | -5.89769300 | 0.47447600 |
| H | -5.26309500 | -4.77068700 | 0.61947300 |

Na<sup>+</sup>@ V<sub>B</sub> *h*-BN (reactant)

|    |             |             |             |
|----|-------------|-------------|-------------|
| Na | 1.42092300  | -0.49094200 | 2.26040500  |
| B  | -1.17772300 | -0.94237000 | 0.24621500  |
| B  | -0.31066800 | 1.43638000  | 0.20612700  |
| B  | 0.48940600  | -2.86140700 | 0.15876100  |
| B  | -1.98904400 | -3.30602500 | 0.00828900  |
| B  | -3.62819200 | -1.38974900 | -0.00248400 |
| B  | -2.77062900 | 0.97361800  | 0.02490300  |
| B  | -1.93035600 | 3.34051600  | -0.00266300 |
| B  | 0.54971900  | 3.79795300  | -0.00482800 |
| B  | 2.20901600  | 1.90120400  | 0.11003100  |
| B  | 3.87756500  | -0.00840600 | 0.08328900  |
| B  | 3.00199500  | -2.39846200 | 0.09220100  |
| N  | 2.92878300  | -1.01161500 | 0.50119900  |
| N  | 0.09530500  | -1.53424000 | 0.60036000  |
| N  | 1.86719000  | -3.28954300 | 0.00793900  |
| N  | 3.55537500  | 1.39215500  | -0.03074800 |
| N  | 1.06929200  | 1.09413700  | 0.51448100  |
| N  | 1.92182200  | 3.31193000  | -0.01694500 |
| N  | -0.55616300 | 2.85555700  | 0.08246200  |
| N  | -1.39222000 | 0.48244200  | 0.14849200  |
| N  | -3.01997600 | 2.39460600  | -0.01972000 |
| N  | -3.86653600 | 0.03356300  | -0.01881900 |
| N  | -2.26228700 | -1.88098500 | 0.10285800  |
| N  | -0.61332900 | -3.78300100 | 0.00115100  |
| B  | 2.12373300  | -4.71765800 | -0.23652100 |
| B  | -0.34765900 | -5.20410300 | -0.19806100 |
| B  | -5.24047500 | 0.52191100  | -0.10689000 |

|   |             |             |             |
|---|-------------|-------------|-------------|
| B | -4.39368700 | 2.88699300  | -0.10168200 |
| B | 3.02163000  | 4.25754700  | -0.20043400 |
| B | 4.65219600  | 2.34149200  | -0.25442600 |
| N | 5.22873600  | -0.50711500 | -0.12008500 |
| N | 4.36622800  | -2.86691700 | -0.12238600 |
| N | -3.08567600 | -4.23645100 | -0.12169800 |
| N | -4.71777500 | -2.33783600 | -0.09647200 |
| N | -2.17837600 | 4.76486200  | -0.08088700 |
| N | 0.28098600  | 5.21292600  | -0.11346400 |
| B | 5.46475200  | -1.93014900 | -0.20797800 |
| B | -4.44959700 | -3.75219200 | -0.14631100 |
| B | -1.08212900 | 5.69601400  | -0.12652500 |
| B | 6.30849800  | 0.44332700  | -0.33498300 |
| B | -6.08412100 | -1.84863300 | -0.16717700 |
| N | 5.98647200  | 1.82403700  | -0.37993000 |
| N | -6.30124900 | -0.44479000 | -0.16120400 |
| N | -5.46024600 | 1.93476900  | -0.13553500 |
| N | 4.35065900  | 3.73573200  | -0.30711100 |
| N | 2.70758000  | 5.65237000  | -0.27665800 |
| N | -4.60353100 | 4.30664400  | -0.14469700 |
| B | 4.60380800  | -4.28619500 | -0.33276300 |
| B | -2.81837200 | -5.65688400 | -0.25535900 |
| B | 1.37767100  | 6.15588600  | -0.23238600 |
| B | -3.54565400 | 5.25334900  | -0.14312200 |
| N | -1.46446800 | -6.09531200 | -0.29383200 |
| N | 1.01884500  | -5.61972300 | -0.29830800 |
| N | 3.48449100  | -5.15463500 | -0.37278600 |
| H | 1.16972400  | 7.32530100  | -0.29940700 |

|   |             |             |             |
|---|-------------|-------------|-------------|
| H | -1.29276700 | 6.86482700  | -0.18454100 |
| H | -3.76968600 | 6.42114100  | -0.19431900 |
| H | 6.56694900  | -2.33266500 | -0.39630000 |
| H | 7.42714300  | 0.06417900  | -0.47607400 |
| H | 5.71044000  | -4.69811300 | -0.47583500 |
| H | -3.71111300 | -6.43879700 | -0.33991900 |
| H | -5.34835300 | -4.52762900 | -0.21866200 |
| H | -6.99810100 | -2.60846100 | -0.23070300 |
| H | 6.74889100  | 2.47095400  | -0.53193300 |
| H | 5.11184300  | 4.38658500  | -0.44967000 |
| H | 3.45476100  | 6.32548600  | -0.38194100 |
| H | -5.54741100 | 4.66585800  | -0.19310300 |
| H | -6.41037000 | 2.27578600  | -0.19777100 |
| H | -7.25870000 | -0.12436700 | -0.21558500 |
| H | -1.30213300 | -7.08662900 | -0.40951800 |
| H | 1.21280300  | -6.60085900 | -0.45072000 |
| H | 3.66797700  | -6.13702200 | -0.52813500 |

Na<sup>+</sup>@ V<sub>B</sub> *h*-BN (product)

|    |             |             |             |
|----|-------------|-------------|-------------|
| Na | 1.41770400  | 0.50164100  | -2.26123400 |
| B  | -0.30082300 | -1.43831400 | -0.20701900 |
| B  | -1.18423200 | 0.93463400  | -0.24756900 |
| B  | 2.22199900  | -1.88636400 | -0.11126000 |
| B  | 0.57542800  | -3.79408000 | 0.00506600  |
| B  | -1.90759700 | -3.35319900 | 0.00370400  |
| B  | -2.76381300 | -0.99210200 | -0.02573400 |
| B  | -3.63773500 | 1.36527900  | 0.00047900  |
| B  | -2.01151500 | 3.29266600  | -0.00910600 |
| B  | 0.46990900  | 2.86472100  | -0.15864200 |

|   |             |             |             |
|---|-------------|-------------|-------------|
| B | 2.98547800  | 2.41833500  | -0.09145000 |
| B | 3.87767200  | 0.03445700  | -0.08404700 |
| N | 2.92171900  | 1.03116900  | -0.50132200 |
| N | 1.07687700  | -1.08688600 | -0.51549000 |
| N | 3.56490000  | -1.36830000 | 0.02920600  |
| N | 1.84476700  | 3.30174500  | -0.00687900 |
| N | 0.08481500  | 1.53528700  | -0.60126500 |
| N | -0.63901200 | 3.77880700  | -0.00087000 |
| N | -2.27515000 | 1.86583400  | -0.10446900 |
| N | -1.38877000 | -0.49165100 | -0.14974300 |
| N | -3.86624300 | -0.05957100 | 0.01730300  |
| N | -3.00365400 | -2.41468300 | 0.02010800  |
| N | -0.53674500 | -2.85904300 | -0.08247700 |
| N | 1.94429000  | -3.29895200 | 0.01597200  |
| B | 4.66821100  | -2.31025500 | 0.25195000  |
| B | 3.05051100  | -4.23710700 | 0.19917000  |
| B | -4.37394000 | -2.91638500 | 0.10281500  |
| B | -5.23686300 | -0.55724200 | 0.10554900  |
| B | -0.38295500 | 5.20144200  | 0.19997900  |
| B | 2.09163300  | 4.73135000  | 0.23887900  |
| N | 4.34646100  | 2.89581600  | 0.12364900  |
| N | 5.22539400  | 0.54216800  | 0.11934900  |
| N | 0.31624300  | -5.21062600 | 0.11531500  |
| N | -2.14602000 | -4.77909100 | 0.08380100  |
| N | -4.73376400 | 2.30603900  | 0.09396600  |
| N | -3.11444800 | 4.21556100  | 0.12077900  |
| B | 5.45148300  | 1.96669500  | 0.20850100  |
| B | -1.04359400 | -5.70283800 | 0.13002800  |



|   |             |             |            |
|---|-------------|-------------|------------|
| B | -4.47512600 | 3.72207600  | 0.14438600 |
| B | 4.57450000  | 4.31647400  | 0.33543400 |
| B | -3.50991700 | -5.27679800 | 0.14710900 |
| N | 3.44937600  | 5.17734500  | 0.37597400 |
| N | -4.57420400 | -4.33731800 | 0.14777100 |
| N | -5.44704000 | -1.97147200 | 0.13545100 |
| N | 0.98072200  | 5.62597200  | 0.30124400 |
| N | -1.50577900 | 6.08502100  | 0.29610200 |
| N | -6.30422400 | 0.40223500  | 0.15885500 |
| B | 6.31173400  | -0.40104100 | 0.33306400 |
| B | 1.41924100  | -6.14625500 | 0.23424200 |
| B | -2.85670000 | 5.63761300  | 0.25611300 |
| B | -6.09676900 | 1.80750700  | 0.16425900 |
| N | 2.74579700  | -5.63393600 | 0.27667500 |
| N | 4.37615400  | -3.70649300 | 0.30450900 |
| N | 5.99908100  | -1.78389700 | 0.37682900 |
| H | -3.75472200 | 6.41344500  | 0.34072200 |
| H | -5.37908800 | 4.49150500  | 0.21614300 |
| H | -7.01598400 | 2.56105300  | 0.22718600 |
| H | 6.55086700  | 2.37668200  | 0.39717600 |
| H | 5.67831500  | 4.73564200  | 0.47912100 |
| H | 7.42776300  | -0.01432900 | 0.47424400 |
| H | 1.21894200  | -7.31692800 | 0.30264700 |
| H | -1.24629000 | -6.87297100 | 0.18963900 |
| H | -3.72598400 | -6.44600600 | 0.20004300 |
| H | 3.62625400  | 6.16079000  | 0.53231300 |
| H | 1.16824900  | 6.60821300  | 0.45460500 |
| H | -1.35015100 | 7.07728900  | 0.41285700 |

|   |             |             |            |
|---|-------------|-------------|------------|
| H | -7.25948500 | 0.07531300  | 0.21314300 |
| H | -6.39481800 | -2.31890300 | 0.19794100 |
| H | -5.51563900 | -4.70277400 | 0.19692400 |
| H | 3.49752800  | -6.30196100 | 0.38196700 |
| H | 5.14172500  | -4.35223300 | 0.44682800 |
| H | 6.76587400  | -2.42579000 | 0.52814800 |

Na@ V<sub>BN</sub> *h*-BN

|    |             |             |             |
|----|-------------|-------------|-------------|
| Na | -0.38018000 | 1.22280100  | 0.37657300  |
| B  | 1.63969100  | 0.31637400  | 0.08375800  |
| B  | -0.68472800 | -1.20810700 | 0.35698500  |
| B  | 1.48694400  | 2.35745700  | -0.02310700 |
| B  | -1.04496600 | 3.56227800  | 0.18522800  |
| B  | -3.21397900 | 2.31411000  | 0.49105700  |
| B  | -3.01308900 | -0.23284600 | 0.53304900  |
| B  | -2.73134000 | -2.64024000 | -0.04518200 |
| B  | -0.43986400 | -3.66637100 | -0.14236100 |
| B  | 1.63912900  | -2.21437600 | 0.10652300  |
| B  | 3.82635300  | -0.96480100 | 0.11409500  |
| B  | 3.73910200  | 1.50737300  | -0.05253600 |
| N  | 3.06301300  | 0.24245100  | 0.03332000  |
| N  | 2.87983800  | 2.65428200  | -0.11930500 |
| N  | 3.10345000  | -2.20120300 | 0.14849300  |
| N  | 0.83520100  | -0.94571200 | 0.18495500  |
| N  | 1.00159400  | -3.52207100 | -0.01622000 |
| N  | -1.27062900 | -2.50610100 | 0.00776700  |
| N  | -1.63553200 | -0.28625700 | 0.84558100  |
| N  | -3.60922600 | -1.51294900 | 0.16272100  |
| N  | -3.82302400 | 0.98769000  | 0.48687500  |

|   |             |             |             |
|---|-------------|-------------|-------------|
| N | -1.85033400 | 2.55929200  | 0.75443500  |
| N | 0.48944200  | 3.47655300  | -0.02422600 |
| B | 3.45629300  | 3.97000500  | -0.22778200 |
| B | 1.09351500  | 4.81764500  | -0.27597400 |
| B | -5.24481000 | 0.87728100  | 0.22821100  |
| B | -5.04090100 | -1.62005900 | -0.01915000 |
| B | 1.79989100  | -4.74388100 | -0.04766300 |
| B | 3.89364700  | -3.42361800 | 0.18319700  |
| N | 5.28229200  | -0.87837200 | 0.13749900  |
| N | 5.17401800  | 1.61532700  | -0.05964600 |
| N | -1.81857800 | 4.75475200  | -0.21246200 |
| N | -3.99827300 | 3.50160700  | 0.11543400  |
| N | -3.32273500 | -3.93796400 | -0.35318700 |
| N | -1.05156100 | -4.96719500 | -0.38608500 |
| B | 5.94874500  | 0.39905900  | 0.04889800  |
| B | -3.27488000 | 4.70788700  | -0.19049100 |
| B | -2.48204000 | -5.08863500 | -0.51481000 |
| B | 6.04570000  | -2.10409300 | 0.23183400  |
| B | -5.43087800 | 3.38307300  | -0.03133900 |
| N | 5.33077600  | -3.32889800 | 0.26282100  |
| N | -6.01797500 | 2.09125800  | 0.08328500  |
| N | -5.83369100 | -0.42911200 | 0.08485600  |
| N | 3.21790600  | -4.67128800 | 0.11790700  |
| N | 1.15771300  | -6.01340000 | -0.25218900 |
| N | -5.58304600 | -2.92239600 | -0.31756600 |
| B | 5.75979900  | 2.94023000  | -0.15985900 |
| B | -1.15076300 | 5.98193900  | -0.53153900 |
| B | -0.23870900 | -6.15589200 | -0.44901300 |

|   |             |             |             |
|---|-------------|-------------|-------------|
| B | -4.76142800 | -4.06982400 | -0.47864300 |
| N | 0.26774500  | 5.97345000  | -0.49606700 |
| N | 2.51911500  | 5.02988200  | -0.31665400 |
| N | 4.89478500  | 4.07205100  | -0.24746100 |
| H | -0.72118600 | -7.22830000 | -0.64970900 |
| H | -2.96364300 | -6.15456500 | -0.74712800 |
| H | -5.25038800 | -5.13138900 | -0.72286100 |
| H | 7.13945600  | 0.45300800  | 0.06256100  |
| H | 7.23761500  | -2.08762800 | 0.27515100  |
| H | 6.94407500  | 3.08222000  | -0.17027100 |
| H | -1.74835000 | 6.97767800  | -0.80494600 |
| H | -3.87680400 | 5.69851900  | -0.47635300 |
| H | -6.10878700 | 4.33972500  | -0.26251700 |
| H | 5.86856100  | -4.18324900 | 0.31126300  |
| H | 3.75386100  | -5.52797100 | 0.11290400  |
| H | 1.72808900  | -6.84668500 | -0.28625100 |
| H | -6.58054000 | -3.03861100 | -0.42968000 |
| H | -6.82868400 | -0.49319200 | -0.08271100 |
| H | -7.01630200 | 2.02190200  | -0.05822400 |
| H | 0.73715300  | 6.84559400  | -0.69800500 |
| H | 2.84049100  | 5.98059900  | -0.43893000 |
| H | 5.32920100  | 4.98196800  | -0.31769500 |

Na@ V<sub>BN</sub> *h*-BN (reactant)

|    |             |             |             |
|----|-------------|-------------|-------------|
| Na | 0.44253500  | -1.26184500 | -1.96889600 |
| B  | -1.55529700 | -0.36292700 | -0.05541200 |
| B  | 0.64112800  | 1.09507200  | -0.08712100 |
| B  | -1.39854100 | -2.26126900 | 0.13991000  |
| B  | 0.99840700  | -3.38211500 | 0.19095500  |

|   |             |             |             |
|---|-------------|-------------|-------------|
| B | 3.12281100  | -2.25094900 | -0.39750700 |
| B | 2.93223900  | 0.18111200  | -0.42368800 |
| B | 2.69413000  | 2.58962900  | 0.10676700  |
| B | 0.42608800  | 3.58689400  | 0.37038700  |
| B | -1.64419400 | 2.17911400  | 0.02305000  |
| B | -3.77568400 | 0.92950800  | -0.29482300 |
| B | -3.67779100 | -1.52133900 | -0.15772800 |
| N | -2.99640700 | -0.26513400 | -0.21930200 |
| N | -2.80673000 | -2.62752900 | 0.07742700  |
| N | -3.09108800 | 2.17745200  | -0.15518400 |
| N | -0.84420600 | 0.92404200  | -0.03499200 |
| N | -1.01526100 | 3.47097900  | 0.25620100  |
| N | 1.24490100  | 2.42164600  | 0.16571900  |
| N | 1.51970600  | 0.07074100  | -0.49223000 |
| N | 3.55202100  | 1.47859000  | -0.20415200 |
| N | 3.78792600  | -0.98071400 | -0.53111900 |
| N | 1.70616500  | -2.34038600 | -0.44093100 |
| N | -0.48068600 | -3.38402300 | 0.36390900  |
| B | -3.38968200 | -3.92418300 | 0.29595600  |
| B | -1.06935200 | -4.69132800 | 0.74179000  |
| B | 5.22226300  | -0.87640100 | -0.48475800 |
| B | 4.99586600  | 1.60651600  | -0.21219500 |
| B | -1.81707800 | 4.68367800  | 0.35853600  |
| B | -3.88665400 | 3.39227000  | -0.13608300 |
| N | -5.22467900 | 0.83862200  | -0.46650400 |
| N | -5.10844200 | -1.64951100 | -0.29104200 |
| N | 1.80438400  | -4.57219600 | 0.56443400  |
| N | 3.92623500  | -3.45200300 | -0.15629600 |

|   |             |             |             |
|---|-------------|-------------|-------------|
| N | 3.30295500  | 3.89097200  | 0.37180900  |
| N | 1.04079400  | 4.88274000  | 0.64787700  |
| B | -5.88284700 | -0.44555000 | -0.47761600 |
| B | 3.23447900  | -4.60540400 | 0.33959000  |
| B | 2.47331900  | 5.02094200  | 0.66730600  |
| B | -5.99313400 | 2.06223500  | -0.53042900 |
| B | 5.36817400  | -3.37355200 | -0.23445900 |
| N | -5.30648500 | 3.29548200  | -0.37122500 |
| N | 5.98270900  | -2.10559000 | -0.45394500 |
| N | 5.80495600  | 0.43778500  | -0.42633700 |
| N | -3.22908300 | 4.62523600  | 0.13046300  |
| N | -1.17716100 | 5.93018100  | 0.67965200  |
| N | 5.55193000  | 2.91596600  | 0.02489500  |
| B | -5.68605800 | -2.97245300 | -0.15344100 |
| B | 1.18555300  | -5.75490600 | 1.09229700  |
| B | 0.22639100  | 6.05801400  | 0.83332900  |
| B | 4.74224000  | 4.04384000  | 0.32411600  |
| N | -0.22784500 | -5.77227600 | 1.17397600  |
| N | -2.48253700 | -4.94491300 | 0.67398800  |
| N | -4.81977500 | -4.06603900 | 0.13853300  |
| H | 0.71607100  | 7.11504100  | 1.09255100  |
| H | 2.96394200  | 6.08078600  | 0.91014900  |
| H | 5.24468600  | 5.10666900  | 0.53547300  |
| H | -7.06551400 | -0.51147800 | -0.61810200 |
| H | -7.17461700 | 2.03972100  | -0.69830800 |
| H | -6.86206900 | -3.14181800 | -0.26800100 |
| H | 1.82519200  | -6.70385800 | 1.43209100  |
| H | 3.84290300  | -5.60032400 | 0.59677700  |

|   |             |             |             |
|---|-------------|-------------|-------------|
| H | 6.04133900  | -4.35204400 | -0.09703600 |
| H | -5.85598100 | 4.14339800  | -0.39039000 |
| H | -3.76756000 | 5.47891200  | 0.17990100  |
| H | -1.74399700 | 6.75972200  | 0.78569100  |
| H | 6.55401300  | 3.04513500  | 0.01488600  |
| H | 6.81082800  | 0.53009500  | -0.38596500 |
| H | 6.99261800  | -2.07157700 | -0.45794300 |
| H | -0.67089300 | -6.61967600 | 1.50042700  |
| H | -2.80969000 | -5.87581500 | 0.89227900  |
| H | -5.24313200 | -4.97566100 | 0.26036400  |

Na@ V<sub>BN</sub> *h*-BN (product)

|    |             |             |             |
|----|-------------|-------------|-------------|
| Na | 0.44376500  | -1.26171500 | 1.96976200  |
| B  | -1.55534900 | -0.36312000 | 0.05518400  |
| B  | 0.64096800  | 1.09522100  | 0.08730400  |
| B  | -1.39832200 | -2.26147400 | -0.14007900 |
| B  | 0.99883900  | -3.38207700 | -0.19033200 |
| B  | 3.12308500  | -2.25046700 | 0.39778200  |
| B  | 2.93225800  | 0.18161400  | 0.42350400  |
| B  | 2.69375000  | 2.58998100  | -0.10729500 |
| B  | 0.42550900  | 3.58701100  | -0.37019300 |
| B  | -1.64449400 | 2.17892100  | -0.02251200 |
| B  | -3.77592000 | 0.92903300  | 0.29447700  |
| B  | -3.67777300 | -1.52178500 | 0.15642000  |
| N  | -2.99655500 | -0.26551400 | 0.21833700  |
| N  | -2.80653300 | -2.62786800 | -0.07844700 |
| N  | -3.09137400 | 2.17710200  | 0.15574900  |
| N  | -0.84434100 | 0.92391900  | 0.03523800  |
| N  | -1.01575800 | 3.47094100  | -0.25551500 |

|   |             |             |             |
|---|-------------|-------------|-------------|
| N | 1.24451400  | 2.42182500  | -0.16582800 |
| N | 1.51974500  | 0.07112000  | 0.49263100  |
| N | 3.55186100  | 1.47910200  | 0.20359500  |
| N | 3.78808700  | -0.98012300 | 0.53085500  |
| N | 1.70645000  | -2.34000000 | 0.44113100  |
| N | -0.48023200 | -3.38418900 | -0.36344400 |
| B | -3.38921600 | -3.92470900 | -0.29658800 |
| B | -1.06864700 | -4.69164900 | -0.74122800 |
| B | 5.22238900  | -0.87563900 | 0.48427100  |
| B | 4.99572500  | 1.60716400  | 0.21111400  |
| B | -1.81772700 | 4.68359700  | -0.35733100 |
| B | -3.88707200 | 3.39185100  | 0.13721800  |
| N | -5.22493500 | 0.83792400  | 0.46592200  |
| N | -5.10847500 | -1.65011700 | 0.28939000  |
| N | 1.80499500  | -4.57219900 | -0.56332500 |
| N | 3.92667600  | -3.45155400 | 0.15724500  |
| N | 3.30236000  | 3.89134100  | -0.37276400 |
| N | 1.04002800  | 4.88291400  | -0.64784600 |
| B | -5.88299500 | -0.44630300 | 0.47623900  |
| B | 3.23505500  | -4.60518100 | -0.33828700 |
| B | 2.47251600  | 5.02122000  | -0.66800600 |
| B | -5.99347500 | 2.06142900  | 0.53060700  |
| B | 5.36861600  | -3.37287700 | 0.23514400  |
| N | -5.30687700 | 3.29482900  | 0.37234100  |
| N | 5.98302200  | -2.10473200 | 0.45379700  |
| N | 5.80495400  | 0.43857600  | 0.42531800  |
| N | -3.22964500 | 4.62499500  | -0.12885600 |
| N | -1.17801100 | 5.93021100  | -0.67840000 |



|    |             |             |             |
|----|-------------|-------------|-------------|
| N  | 5.55155300  | 2.91660800  | -0.02648300 |
| B  | -5.68586000 | -2.97314300 | 0.15175000  |
| B  | 1.18641800  | -5.75504300 | -1.09118000 |
| B  | 0.22545400  | 6.05816200  | -0.83273800 |
| B  | 4.74163600  | 4.04434100  | -0.32563400 |
| N  | -0.22693800 | -5.77258100 | -1.17314600 |
| N  | -2.48176700 | -4.94553400 | -0.67357700 |
| N  | -4.81935400 | -4.06667100 | -0.13974200 |
| H  | 0.71492600  | 7.11526100  | -1.09205100 |
| H  | 2.96295500  | 6.08110700  | -0.91103900 |
| H  | 5.24393200  | 5.10715200  | -0.53745100 |
| H  | -7.06568100 | -0.51237100 | 0.61654700  |
| H  | -7.17496800 | 2.03876800  | 0.69840400  |
| H  | -6.86189700 | -3.14265000 | 0.26589900  |
| H  | 1.82627900  | -6.70390400 | -1.43081200 |
| H  | 3.84357400  | -5.60017100 | -0.59500200 |
| H  | 6.04185500  | -4.35138800 | 0.09816800  |
| H  | -5.85646600 | 4.14267300  | 0.39200000  |
| H  | -3.76820100 | 5.47864200  | -0.17790300 |
| H  | -1.74492300 | 6.75974700  | -0.78408900 |
| H  | 6.55362200  | 3.04593400  | -0.01694100 |
| H  | 6.81081600  | 0.53090700  | 0.38475800  |
| H  | 6.99292700  | -2.07057200 | 0.45762700  |
| H  | -0.66984700 | -6.62002600 | -1.49968000 |
| H  | -2.80867700 | -5.87657500 | -0.89163500 |
| H  | -5.24261600 | -4.97635000 | -0.26147500 |
| Na | 0.16846400  | -1.19271200 | 0.53994700  |

Na@ V<sub>N</sub> *h*-BN

|   |             |             |             |
|---|-------------|-------------|-------------|
| B | -1.67383200 | -0.34098300 | -0.09966500 |
| B | 1.75854200  | -1.02712700 | 1.85268900  |
| B | 0.69429600  | 1.16343000  | 0.38489700  |
| B | -1.49340800 | -2.33107400 | -0.12945700 |
| B | 1.10773800  | -3.40422700 | 0.42325700  |
| B | 3.27616000  | -2.20035300 | 0.42230900  |
| B | 3.03882100  | 0.30513300  | 0.34194500  |
| B | 2.64541600  | 2.67773700  | -0.19298400 |
| B | 0.35889100  | 3.64105200  | 0.02077000  |
| B | -1.68085300 | 2.15440700  | 0.18802300  |
| B | -3.85949600 | 0.91686400  | -0.13643800 |
| B | -3.72655800 | -1.53704300 | -0.44669300 |
| N | -3.07622200 | -0.26171500 | -0.31685000 |
| N | -2.85134800 | -2.67257200 | -0.38416500 |
| N | -3.14780000 | 2.12836400  | 0.14107900  |
| N | -0.84989600 | 0.89337000  | 0.18316900  |
| N | -1.06625300 | 3.47294500  | 0.22765000  |
| N | 1.21271000  | 2.48037000  | 0.01516900  |
| N | 1.68402200  | 0.20395200  | 0.85962700  |
| N | 3.54927900  | 1.55961700  | -0.13206800 |
| N | 3.88206100  | -0.88364400 | 0.32340900  |
| N | 1.90938800  | -2.29264900 | 0.90761600  |
| N | -0.45082800 | -3.38877100 | 0.14569900  |
| B | -3.40187300 | -3.99945300 | -0.36162000 |
| B | -1.03522800 | -4.76645000 | 0.05527100  |
| B | 5.26778400  | -0.77051900 | -0.09845200 |
| B | 4.95971600  | 1.69943500  | -0.44179700 |
| B | -1.87852300 | 4.67732400  | 0.37921900  |

|   |             |             |             |
|---|-------------|-------------|-------------|
| B | -3.95630600 | 3.32477500  | 0.32877200  |
| N | -5.31107500 | 0.81487700  | -0.22152300 |
| N | -5.15438700 | -1.66652100 | -0.55078300 |
| N | 1.85675600  | -4.63150700 | 0.12616200  |
| N | 4.02023000  | -3.38354500 | 0.05215300  |
| N | 3.18479100  | 3.99290500  | -0.50390900 |
| N | 0.93088300  | 4.97214300  | -0.15137200 |
| B | -5.95053500 | -0.46100500 | -0.45209700 |
| B | 3.30022500  | -4.62300500 | 0.00794100  |
| B | 2.32707700  | 5.14009900  | -0.45432400 |
| B | -6.09296700 | 2.01330600  | -0.00604100 |
| B | 5.43344000  | -3.27854600 | -0.23849900 |
| N | -5.39406600 | 3.21640400  | 0.27482000  |
| N | 6.02767600  | -1.98517600 | -0.26403700 |
| N | 5.79478700  | 0.53411800  | -0.38333300 |
| N | -3.29446400 | 4.56504000  | 0.53475800  |
| N | -1.25156900 | 5.96918300  | 0.34192000  |
| N | 5.43913600  | 3.00952600  | -0.79330200 |
| B | -5.70862900 | -3.00823000 | -0.62672900 |
| B | 1.20897400  | -5.91023200 | 0.05154500  |
| B | 0.11743000  | 6.14988700  | 0.02760900  |
| B | 4.59240100  | 4.15107700  | -0.80850000 |
| N | -0.20224400 | -5.93156500 | 0.13359100  |
| N | -2.44504400 | -5.02101100 | -0.13574100 |
| N | -4.82708800 | -4.13033900 | -0.54142100 |
| H | 0.58119500  | 7.24340800  | -0.07989700 |
| H | 2.76690000  | 6.22980100  | -0.65394000 |
| H | 5.03597500  | 5.22724600  | -1.07168300 |

|   |             |             |             |
|---|-------------|-------------|-------------|
| H | -7.13777700 | -0.52521700 | -0.53597900 |
| H | -7.28431500 | 1.99311900  | -0.05908000 |
| H | -6.88439000 | -3.17380500 | -0.73974500 |
| H | 1.82800900  | -6.92168300 | -0.06819600 |
| H | 3.88014000  | -5.64821500 | -0.17334400 |
| H | 6.08491400  | -4.25193800 | -0.46843700 |
| H | -5.94427200 | 4.05232300  | 0.41674200  |
| H | -3.84039800 | 5.40856900  | 0.64265600  |
| H | -1.82412500 | 6.79329400  | 0.45925100  |
| H | 6.41697500  | 3.14617400  | -1.00808300 |
| H | 6.76705100  | 0.61976000  | -0.64684600 |
| H | 7.00588300  | -1.92742000 | -0.51129700 |
| H | -0.65355500 | -6.83425200 | 0.08067600  |
| H | -2.73224600 | -5.99048500 | -0.13540900 |
| H | -5.24863000 | -5.04883800 | -0.55979100 |

Na@ V<sub>N</sub> *h*-BN (reactant)

|    |             |             |             |
|----|-------------|-------------|-------------|
| Na | -1.05251600 | -3.10125300 | -1.89850600 |
| B  | -1.20018100 | -0.83606500 | -0.40961000 |
| B  | 1.21065800  | -0.89733100 | 0.38998700  |
| B  | 0.05867500  | 1.32872400  | 0.01290900  |
| B  | 0.00649500  | -2.19711500 | 0.09337900  |
| B  | 2.35996700  | -2.75810100 | -0.59277600 |
| B  | 3.73987600  | -0.79050800 | 0.00920000  |
| B  | 2.49268800  | 1.28512100  | 0.50274700  |
| B  | 1.31486500  | 3.48639700  | 0.34968600  |
| B  | -1.09342500 | 3.54823200  | -0.30463600 |
| B  | -2.37673200 | 1.40873700  | -0.49299500 |
| B  | -3.73148000 | -0.60109800 | -0.02071000 |

|   |             |             |             |
|---|-------------|-------------|-------------|
| B | -2.42493900 | -2.57158500 | 0.71501600  |
| N | -2.51355600 | -1.34920600 | -0.02246900 |
| N | -1.10052900 | -3.10487200 | 0.76877400  |
| N | -3.68142700 | 0.76955800  | -0.44010900 |
| N | -1.14015900 | 0.63134600  | -0.41554900 |
| N | -2.33723300 | 2.85728300  | -0.56050100 |
| N | 0.09178800  | 2.78799200  | 0.01833000  |
| N | 1.21784000  | 0.57220900  | 0.42957100  |
| N | 2.52329500  | 2.73437400  | 0.58749500  |
| N | 3.76108300  | 0.58517300  | 0.42147200  |
| N | 2.48298600  | -1.45851100 | -0.03343400 |
| N | 1.00416100  | -3.25008700 | -0.61465400 |
| B | -1.08892600 | -4.53560200 | 0.93685000  |
| B | 0.98886700  | -4.68820500 | -0.45039100 |
| B | 5.02663000  | 1.27723500  | 0.51479700  |
| B | 3.78326100  | 3.42943900  | 0.78749700  |
| B | -3.55961700 | 3.61710300  | -0.75837800 |
| B | -4.91077300 | 1.52916200  | -0.51429800 |
| N | -4.96302400 | -1.23637000 | 0.43080000  |
| N | -3.63164300 | -3.20825600 | 1.23040900  |
| N | 3.54878500  | -3.49737500 | -0.99908100 |
| N | 4.94999600  | -1.50731200 | -0.37774000 |
| N | 1.34091300  | 4.94438400  | 0.38579800  |
| N | -1.05093200 | 5.00585700  | -0.31988600 |
| B | -4.89915500 | -2.53940800 | 1.06384100  |
| B | 4.84077500  | -2.86092500 | -0.87859000 |
| B | 0.16239900  | 5.69282700  | 0.03990700  |
| B | -6.19795400 | -0.49844900 | 0.27598100  |

|   |             |             |             |
|---|-------------|-------------|-------------|
| B | 6.21797700  | -0.83000100 | -0.21863600 |
| N | -6.14605600 | 0.82962800  | -0.24481500 |
| N | 6.22688300  | 0.51624200  | 0.25647500  |
| N | 5.00759200  | 2.67894800  | 0.81622800  |
| N | -4.82086300 | 2.92852500  | -0.80586000 |
| N | -3.45911800 | 5.05023600  | -0.86171000 |
| N | 3.75195500  | 4.86537500  | 0.91234000  |
| B | -3.47728500 | -4.53685900 | 1.78289100  |
| B | 3.37756600  | -4.90505200 | -1.26664700 |
| B | -2.24625500 | 5.75619000  | -0.63264400 |
| B | 2.57347600  | 5.63159400  | 0.70474400  |
| N | 2.09463300  | -5.46563600 | -0.99181800 |
| N | -0.08782300 | -5.32208700 | 0.26238800  |
| N | -2.21004500 | -5.16622400 | 1.62089900  |
| H | -2.22407700 | 6.94878900  | -0.68390400 |
| H | 0.18933800  | 6.88552100  | 0.04950100  |
| H | 2.60693900  | 6.82302200  | 0.77627200  |
| H | -5.90334800 | -3.06050600 | 1.44601400  |
| H | -7.24621400 | -0.98401800 | 0.57957100  |
| H | -4.38738900 | -5.10966700 | 2.30303100  |
| H | 4.27756700  | -5.59133100 | -1.64915200 |
| H | 5.82721500  | -3.46169100 | -1.18296400 |
| H | 7.24567900  | -1.37955300 | -0.48172900 |
| H | -7.02072300 | 1.33171100  | -0.31194400 |
| H | -5.66786000 | 3.47615300  | -0.87427000 |
| H | -4.29153700 | 5.59455800  | -1.04005600 |
| H | 4.61016400  | 5.36606900  | 1.09628000  |
| H | 5.88144800  | 3.18003700  | 0.90089900  |

|   |             |             |             |
|---|-------------|-------------|-------------|
| H | 7.12595600  | 0.97120800  | 0.33481400  |
| H | 2.01349500  | -6.47298100 | -1.02145400 |
| H | -0.07699400 | -6.32594100 | 0.38464700  |
| H | -2.13577500 | -6.13823100 | 1.88895400  |

Na@ V<sub>N</sub> *h*-BN (product)

|    |             |             |             |
|----|-------------|-------------|-------------|
| Na | 1.05165300  | -3.10284400 | 1.89793100  |
| B  | -1.21122000 | -0.89678500 | -0.38973000 |
| B  | 1.20003800  | -0.83671900 | 0.41005000  |
| B  | -0.05809400 | 1.32862500  | -0.01242100 |
| B  | -0.00737900 | -2.19694400 | -0.09291100 |
| B  | 2.42371100  | -2.57247700 | -0.71511600 |
| B  | 3.73128100  | -0.60263100 | 0.02020000  |
| B  | 2.37740900  | 1.40766500  | 0.49319600  |
| B  | 1.09494900  | 3.54769100  | 0.30522100  |
| B  | -1.31327300 | 3.48692800  | -0.34929100 |
| B  | -2.49212500 | 1.28627500  | -0.50259100 |
| B  | -3.74042700 | -0.78884400 | -0.00963000 |
| B  | -2.36148400 | -2.75706900 | 0.59263900  |
| N  | -2.48387000 | -1.45744900 | 0.03331200  |
| N  | -1.00583500 | -3.24949000 | 0.61502700  |
| N  | -3.76085300 | 0.58689500  | -0.42168900 |
| N  | -1.21763400 | 0.57273700  | -0.42923200 |
| N  | -2.52206000 | 2.73551900  | -0.58725800 |
| N  | -0.09057600 | 2.78794800  | -0.01776600 |
| N  | 1.14046500  | 0.63075500  | 0.41607600  |
| N  | 2.33850100  | 2.85620900  | 0.56094700  |
| N  | 3.68186500  | 0.76800900  | 0.43971400  |
| N  | 2.51309700  | -1.35029000 | 0.02250300  |

|   |             |             |             |
|---|-------------|-------------|-------------|
| N | 1.09903300  | -3.10522100 | -0.76855400 |
| B | -0.99079500 | -4.68766200 | 0.45144400  |
| B | 1.08722800  | -4.53606100 | -0.93571700 |
| B | 4.91151500  | 1.52711500  | 0.51365800  |
| B | 3.56122800  | 3.61550400  | 0.75866800  |
| B | -3.78164600 | 3.43118800  | -0.78750000 |
| B | -5.02608500 | 1.27952400  | -0.51523700 |
| N | -4.95094600 | -1.50520700 | 0.37688900  |
| N | -3.55071400 | -3.49593400 | 0.99847600  |
| N | 3.62997300  | -3.20960100 | -1.23100500 |
| N | 4.96241000  | -1.23824800 | -0.43188800 |
| N | 1.05312600  | 5.00533400  | 0.32056200  |
| N | -1.33864300 | 4.94493400  | -0.38544600 |
| B | -4.84241400 | -2.85890100 | 0.87765200  |
| B | 4.89783100  | -2.54126300 | -1.06494700 |
| B | -0.15987200 | 5.69285800  | -0.03931100 |
| B | -6.21859300 | -0.82733600 | 0.21749500  |
| B | 6.19766800  | -0.50079800 | -0.27744500 |
| N | -6.22674300 | 0.51900400  | -0.25737800 |
| N | 6.14646700  | 0.82721800  | 0.24358900  |
| N | 4.82222100  | 2.92644200  | 0.80562100  |
| N | -5.00635400 | 2.68128300  | -0.81640100 |
| N | -3.74965600 | 4.86709500  | -0.91240700 |
| N | 3.46133100  | 5.04865600  | 0.86235600  |
| B | -3.38006200 | -4.90361000 | 1.26629000  |
| B | 3.47510000  | -4.53831800 | -1.78299100 |
| B | -2.57083000 | 5.63273300  | -0.70457500 |
| B | 2.24875400  | 5.75514400  | 0.63340500  |



|   |             |             |             |
|---|-------------|-------------|-------------|
| N | 2.20778500  | -5.16735100 | -1.62006300 |
| N | 0.08657700  | -5.32207600 | -0.25990000 |
| N | -2.09713600 | -5.46463300 | 0.99225100  |
| H | -2.60371000 | 6.82417600  | -0.77613000 |
| H | -0.18629700 | 6.88556300  | -0.04885700 |
| H | 2.22703800  | 6.94774400  | 0.68485700  |
| H | -5.82917600 | -3.45932800 | 1.18164300  |
| H | -7.24662100 | -1.37645100 | 0.48021200  |
| H | -4.28047100 | -5.58960600 | 1.64834400  |
| H | 4.38477900  | -5.11148500 | -2.30347000 |
| H | 5.90169000  | -3.06272600 | -1.44748000 |
| H | 7.24562300  | -0.98670500 | -0.58154700 |
| H | -7.12558700 | 0.97439700  | -0.33587600 |
| H | -5.87996900 | 3.18274600  | -0.90131400 |
| H | -4.60761100 | 5.36816300  | -1.09649100 |
| H | 4.29399600  | 5.59260800  | 1.04068400  |
| H | 5.66944400  | 3.47373500  | 0.87393000  |
| H | 7.02133000  | 1.32899200  | 0.31045700  |
| H | 2.13311900  | -6.13945900 | -1.88762700 |
| H | 0.07571500  | -6.32600700 | -0.38158100 |
| H | -2.01636400 | -6.47200300 | 1.02211000  |

Na<sup>+</sup>@ V<sub>N</sub> *h*-BN

|    |             |             |             |
|----|-------------|-------------|-------------|
| Na | -0.17803300 | -1.18876500 | -0.56146200 |
| B  | -1.94267400 | -0.97558400 | -1.63249700 |
| B  | 1.67100400  | -0.36512400 | 0.08119500  |
| B  | -0.64144300 | 1.20690800  | -0.41074100 |
| B  | 1.45410700  | -2.36901800 | 0.09708200  |
| B  | 3.68580800  | -1.60591700 | 0.46833500  |

|   |             |             |             |
|---|-------------|-------------|-------------|
| B | 3.87288200  | 0.85354300  | 0.16803500  |
| B | 1.73347600  | 2.14363300  | -0.21066600 |
| B | -0.27874600 | 3.66812700  | -0.08176600 |
| B | -2.58897500 | 2.74144300  | 0.17240700  |
| B | -3.05845200 | 0.37693200  | -0.29430700 |
| B | -3.34481100 | -2.15853300 | -0.38911900 |
| B | -1.14172500 | -3.41940200 | -0.48098500 |
| N | -1.97145900 | -2.26464900 | -0.93230000 |
| N | 0.38404400  | -3.40983300 | -0.21500200 |
| N | -3.89027300 | -0.81981600 | -0.25717000 |
| N | -1.69835900 | 0.24676400  | -0.86648000 |
| N | -3.51586300 | 1.63065700  | 0.16499900  |
| N | -1.15899300 | 2.50851300  | -0.06774400 |
| N | 0.86219700  | 0.88618000  | -0.22390700 |
| N | 1.13805700  | 3.46350900  | -0.27390100 |
| N | 3.18722700  | 2.07595900  | -0.13030700 |
| N | 3.05615600  | -0.31549500 | 0.32475500  |
| N | 2.78647600  | -2.73007000 | 0.37506500  |
| B | 0.95722000  | -4.80881700 | -0.12737800 |
| B | 3.32222500  | -4.07079000 | 0.36331600  |
| B | 4.02978400  | 3.26120100  | -0.30172400 |
| B | 1.98123900  | 4.65821600  | -0.42171200 |
| B | -4.92370300 | 1.79640800  | 0.51565900  |
| B | -5.28436100 | -0.68107700 | 0.19860900  |
| N | -4.07736400 | -3.32847000 | -0.03662900 |
| N | -1.92945200 | -4.60924000 | -0.22437400 |
| N | 5.09809200  | -1.76052000 | 0.60711000  |
| N | 5.31056200  | 0.71995900  | 0.28989400  |

|   |             |             |             |
|---|-------------|-------------|-------------|
| N | -0.83568200 | 4.99849300  | 0.05965600  |
| N | -3.09942800 | 4.05799600  | 0.46249300  |
| B | -3.37389500 | -4.58382500 | -0.06306300 |
| B | 5.92344600  | -0.56671200 | 0.53674100  |
| B | -2.22521100 | 5.19848700  | 0.36977700  |
| B | -5.48712700 | -3.19759100 | 0.30592400  |
| B | 6.12686200  | 1.90527800  | 0.09630800  |
| N | -6.04399100 | -1.88920100 | 0.36909600  |
| N | 5.45751400  | 3.11987200  | -0.20641400 |
| N | 3.39402700  | 4.50949200  | -0.53629200 |
| N | -5.76610900 | 0.63100000  | 0.49311500  |
| N | -5.36331300 | 3.11412100  | 0.84991300  |
| N | 1.37001000  | 5.95461800  | -0.42103200 |
| B | -1.30357200 | -5.91500800 | -0.18550300 |
| B | 5.63197100  | -3.11320700 | 0.69724400  |
| B | -4.49803600 | 4.24620500  | 0.80773100  |
| B | 0.00130000  | 6.16669300  | -0.13354400 |
| N | 4.73170800  | -4.22118000 | 0.58110900  |
| N | 2.35014600  | -5.07358900 | 0.10129800  |
| N | 0.10296900  | -5.95225400 | -0.25616100 |
| H | -4.91532600 | 5.33217800  | 1.05532100  |
| H | -2.65107300 | 6.29436300  | 0.54337600  |
| H | -0.45191100 | 7.26368300  | -0.05589800 |
| H | -3.96338200 | -5.60184700 | 0.09553800  |
| H | -6.14495200 | -4.16049500 | 0.53686500  |
| H | -1.95060000 | -6.90788900 | -0.10906000 |
| H | 6.79796700  | -3.29639000 | 0.84374600  |
| H | 7.10316900  | -0.65515300 | 0.65434200  |

|   |             |             |             |
|---|-------------|-------------|-------------|
| H | 7.31238800  | 1.85753400  | 0.18349000  |
| H | -7.01548500 | -1.82132500 | 0.64315100  |
| H | -6.73139700 | 0.73534600  | 0.77808300  |
| H | -6.33040700 | 3.27911700  | 1.09444000  |
| H | 1.95530200  | 6.76979300  | -0.54331900 |
| H | 3.96125700  | 5.33989300  | -0.64096600 |
| H | 6.03146200  | 3.94280100  | -0.33338900 |
| H | 5.14181200  | -5.14519900 | 0.61086800  |
| H | 2.62709700  | -6.04673000 | 0.10617700  |
| H | 0.53717500  | -6.86531800 | -0.22899600 |

Na<sup>+</sup>@ V<sub>N</sub> *h*-BN (reactant)

|    |             |             |             |
|----|-------------|-------------|-------------|
| Na | 1.65714800  | -1.41948100 | -2.35154400 |
| B  | -0.76277400 | -1.27340300 | -0.54141000 |
| B  | 1.43327300  | -0.13898700 | 0.09696500  |
| B  | -0.78333400 | 1.15773500  | -0.02877100 |
| B  | 1.48756400  | -2.09605900 | 0.29591200  |
| B  | 3.65068300  | -1.10999300 | -0.31745200 |
| B  | 3.51305900  | 1.35079900  | -0.28128000 |
| B  | 1.33311900  | 2.41019600  | 0.25631200  |
| B  | -0.87399000 | 3.60899200  | 0.42711100  |
| B  | -2.99218700 | 2.35824600  | -0.05565100 |
| B  | -2.92381300 | -0.10019700 | -0.45634400 |
| B  | -2.83870600 | -2.57745200 | -0.28571900 |
| B  | -0.63559000 | -3.55466300 | 0.41326300  |
| N  | -1.37361100 | -2.51040600 | -0.24729400 |
| N  | 0.78160100  | -3.32807200 | 0.64509300  |
| N  | -3.58669200 | -1.37660000 | -0.52677900 |
| N  | -1.45477700 | -0.05180800 | -0.43993900 |

|   |             |             |             |
|---|-------------|-------------|-------------|
| N | -3.67055000 | 1.11670500  | -0.35650700 |
| N | -1.54737000 | 2.36350700  | 0.12221700  |
| N | 0.65388300  | 1.09253700  | 0.18886000  |
| N | 0.57201700  | 3.61888300  | 0.47215600  |
| N | 2.76219400  | 2.51560100  | 0.05828900  |
| N | 2.82655600  | 0.06559100  | -0.31808600 |
| N | 2.89191600  | -2.30848900 | -0.08720600 |
| B | 1.54177900  | -4.54487200 | 1.00254600  |
| B | 3.65292100  | -3.53020200 | 0.17033600  |
| B | 3.44769300  | 3.80130900  | 0.16207100  |
| B | 1.25466000  | 4.89813100  | 0.65465700  |
| B | -5.12499200 | 1.07850100  | -0.46934900 |
| B | -5.04524200 | -1.43230400 | -0.57977200 |
| N | -3.49458500 | -3.83605600 | -0.03258800 |
| N | -1.32158100 | -4.77247600 | 0.77997700  |
| N | 5.06166500  | -1.09128600 | -0.56657400 |
| N | 4.94344000  | 1.39947100  | -0.53472000 |
| N | -1.64286000 | 4.82000400  | 0.62044400  |
| N | -3.74938100 | 3.58087200  | 0.09922400  |
| B | -2.73457500 | -4.93573300 | 0.50336800  |
| B | 5.71601900  | 0.19580100  | -0.70621300 |
| B | -3.07656100 | 4.80565500  | 0.45813500  |
| B | -4.93805200 | -3.91955300 | -0.20406400 |
| B | 5.61867000  | 2.68941300  | -0.47126800 |
| N | -5.65704000 | -2.73310900 | -0.52007100 |
| N | 4.85804900  | 3.83433700  | -0.12134400 |
| N | 2.68168800  | 4.94551200  | 0.52599200  |
| N | -5.76342100 | -0.19655300 | -0.64625200 |

|   |             |             |             |
|---|-------------|-------------|-------------|
| N | -5.83132500 | 2.32259800  | -0.36944100 |
| N | 0.46312400  | 6.06255700  | 0.92911300  |
| B | -0.57562600 | -5.84907200 | 1.39572600  |
| B | 5.78307400  | -2.35265700 | -0.51699200 |
| B | -5.19056400 | 3.56028700  | -0.07642400 |
| B | -0.95839100 | 6.06461400  | 0.91109800  |
| N | 5.05232600  | -3.52615900 | -0.16692700 |
| N | 2.95648500  | -4.60212500 | 0.78398500  |
| N | 0.83148300  | -5.68704200 | 1.50039800  |
| H | -5.82782300 | 4.56021200  | 0.02989600  |
| H | -3.70211500 | 5.80592900  | 0.61108700  |
| H | -1.56928100 | 7.06629600  | 1.11192700  |
| H | -3.26643300 | -5.97184600 | 0.74350200  |
| H | -5.50279200 | -4.95834000 | -0.06713000 |
| H | -1.11168100 | -6.84328000 | 1.76792800  |
| H | 6.95023200  | -2.39991700 | -0.74136300 |
| H | 6.88248200  | 0.24699800  | -0.93046400 |
| H | 6.78456900  | 2.77148800  | -0.69608100 |
| H | -6.66231300 | -2.81231800 | -0.59659700 |
| H | -6.77371500 | -0.22494300 | -0.68834200 |
| H | -6.83783500 | 2.33506000  | -0.46426300 |
| H | 0.92598900  | 6.94489000  | 1.10063600  |
| H | 3.14698300  | 5.83791500  | 0.62473300  |
| H | 5.34854900  | 4.71724900  | -0.07116500 |
| H | 5.58299600  | -4.38112600 | -0.06251600 |
| H | 3.44754500  | -5.45467800 | 1.01835900  |
| H | 1.36279300  | -6.47388500 | 1.84875900  |

Na<sup>+</sup>@ V<sub>N</sub> *h*-BN (product)

|    |             |             |             |
|----|-------------|-------------|-------------|
| Na | -1.39811400 | -2.30879300 | 2.29740800  |
| B  | -1.46165800 | -0.06485900 | -0.12197200 |
| B  | 0.72371500  | -1.28278300 | 0.49886500  |
| B  | 0.78596000  | 1.16804100  | 0.04952700  |
| B  | -1.51497200 | -2.01844300 | -0.26148000 |
| B  | 0.56213500  | -3.53805400 | -0.48569100 |
| B  | 2.79078800  | -2.61090600 | 0.19090600  |
| B  | 2.90334000  | -0.14218500 | 0.44872300  |
| B  | 3.01687400  | 2.32785900  | 0.13715200  |
| B  | 0.93212000  | 3.62808900  | -0.35909600 |
| B  | -1.30023000 | 2.46991000  | -0.28175100 |
| B  | -3.51303200 | 1.45083500  | 0.18167100  |
| B  | -3.65727600 | -1.00256200 | 0.38232100  |
| N  | -2.85316300 | 0.16161300  | 0.21988100  |
| N  | -2.90122600 | -2.22734600 | 0.22248400  |
| N  | -2.73334500 | 2.60120500  | -0.14552000 |
| N  | -0.64533300 | 1.13978300  | -0.19684700 |
| N  | -0.50947700 | 3.66696400  | -0.45639000 |
| N  | 1.57555900  | 2.36343000  | -0.05929600 |
| N  | 1.43375900  | -0.06992800 | 0.42857000  |
| N  | 3.67195900  | 1.06393000  | 0.39968300  |
| N  | 3.55264900  | -1.43052600 | 0.47005000  |
| N  | 1.32842100  | -2.52223100 | 0.18072000  |
| N  | -0.86090800 | -3.28433900 | -0.63581400 |
| B  | -3.69760900 | -3.43504500 | -0.00671300 |
| B  | -1.65598800 | -4.48634900 | -0.96425400 |
| B  | 5.01020700  | -1.51086000 | 0.51454100  |

|   |             |             |             |
|---|-------------|-------------|-------------|
| B | 5.12513700  | 0.99875200  | 0.51837400  |
| B | -1.16403400 | 4.95958200  | -0.65012800 |
| B | -3.39329400 | 3.89702700  | -0.26001600 |
| N | -4.94179400 | 1.52624000  | 0.43797800  |
| N | -5.06466500 | -0.95931000 | 0.65485600  |
| N | 1.21445400  | -4.75557100 | -0.90542900 |
| N | 3.42095200  | -3.87052300 | -0.12107500 |
| N | 3.79851500  | 3.54066100  | 0.03314000  |
| N | 1.72793300  | 4.82929600  | -0.50480800 |
| B | -5.71387700 | 0.33981200  | 0.69912300  |
| B | 2.63518300  | -4.94102600 | -0.67879800 |
| B | 3.15484000  | 4.78707000  | -0.30468600 |
| B | -5.59603200 | 2.82340900  | 0.33707200  |
| B | 4.86612400  | -3.97941000 | 0.02818000  |
| N | -4.81207300 | 3.95082500  | -0.02279900 |
| N | 5.60211800  | -2.81748100 | 0.39006200  |
| N | 5.74625100  | -0.29209000 | 0.63890800  |
| N | -2.59398600 | 5.03153700  | -0.58405900 |
| N | -0.34227300 | 6.11488900  | -0.87276000 |
| N | 5.85316200  | 2.23282500  | 0.47827500  |
| B | -5.79457900 | -2.21096700 | 0.69867300  |
| B | 0.42153400  | -5.80726400 | -1.50611800 |
| B | 1.07627200  | 6.09124100  | -0.79742500 |
| B | 5.23576900  | 3.49132600  | 0.22673400  |
| N | -0.98873900 | -5.62705800 | -1.52273300 |
| N | -3.05029400 | -4.52832100 | -0.64293400 |
| N | -5.08018000 | -3.40988500 | 0.38810800  |
| H | 1.71243200  | 7.08501600  | -0.95542300 |



|   |             |             |             |
|---|-------------|-------------|-------------|
| H | 3.80128000  | 5.77989900  | -0.41321900 |
| H | 5.89030100  | 4.48391000  | 0.16693000  |
| H | -6.87967600 | 0.40858700  | 0.92427900  |
| H | -6.76364300 | 2.92918500  | 0.54410100  |
| H | -6.95570300 | -2.24216700 | 0.95515400  |
| H | 0.92183100  | -6.79875200 | -1.93115000 |
| H | 3.14719600  | -5.97407400 | -0.96995900 |
| H | 5.41527800  | -5.01837800 | -0.16079100 |
| H | -5.28768800 | 4.84055300  | -0.09142700 |
| H | -3.03811300 | 5.93409500  | -0.68755300 |
| H | -0.78322800 | 7.00772600  | -1.04744900 |
| H | 6.85861600  | 2.22403500  | 0.58368200  |
| H | 6.75605500  | -0.33564100 | 0.67904300  |
| H | 6.60689900  | -2.91287100 | 0.45438500  |
| H | -1.54891200 | -6.40000200 | -1.85711300 |
| H | -3.57479500 | -5.36526100 | -0.86106600 |
| H | -5.62389900 | -4.26046200 | 0.32165200  |

Na@ V<sub>N2B</sub> *h*-BN

|    |             |             |             |
|----|-------------|-------------|-------------|
| Na | -0.04323000 | 1.29455800  | 0.25919300  |
| B  | -1.38858100 | -0.53885800 | 0.10696900  |
| B  | 1.43099300  | -0.43878400 | 0.11287800  |
| B  | 0.09814600  | -2.61713900 | -0.18992600 |
| B  | 2.59919900  | -2.71241000 | 0.05844800  |
| B  | 3.83909800  | -0.59995200 | 0.37848600  |
| B  | 2.42196100  | 1.34442500  | 0.17435800  |
| B  | 1.05040000  | 3.67199200  | 0.08427100  |
| B  | -1.29832900 | 3.59601000  | 0.17215700  |
| B  | -2.50410500 | 1.17265800  | 0.26641200  |

|   |             |             |             |
|---|-------------|-------------|-------------|
| B | -3.78303900 | -0.87616500 | 0.33189100  |
| B | -2.40125400 | -2.87477300 | -0.12195500 |
| N | -2.47614000 | -1.46508900 | 0.12040300  |
| N | 0.04273900  | -1.09655000 | 0.00315100  |
| N | -1.10133800 | -3.43649400 | -0.34424300 |
| N | -3.79298800 | 0.54147700  | 0.42269600  |
| N | -2.48064700 | 2.62731000  | 0.18053100  |
| N | -0.08845900 | 3.25677000  | 0.76288500  |
| N | 2.29327500  | 2.78796000  | 0.02725800  |
| N | 3.75511600  | 0.81700100  | 0.33907000  |
| N | 2.57537100  | -1.28868400 | 0.20887500  |
| N | 1.35289300  | -3.36458300 | -0.21854100 |
| B | -1.05003700 | -4.86571400 | -0.64365300 |
| B | 1.41347100  | -4.79930300 | -0.48810400 |
| B | 4.96801100  | 1.60081100  | 0.38595000  |
| B | 3.53968200  | 3.56226400  | -0.15774600 |
| B | -3.78504400 | 3.32099500  | 0.10070600  |
| B | -5.05564200 | 1.23292300  | 0.54888300  |
| N | -4.98728500 | -1.66462800 | 0.41285400  |
| N | -3.62192100 | -3.67122800 | -0.13713800 |
| N | 3.86443300  | -3.42861500 | 0.16199600  |
| N | 5.09060100  | -1.29631400 | 0.54064900  |
| N | 1.05404300  | 4.94900800  | -0.66688100 |
| N | -1.44093000 | 4.87761300  | -0.55752900 |
| B | -4.90178100 | -3.07713300 | 0.16594700  |
| B | 5.09636700  | -2.72929500 | 0.44030600  |
| B | -0.22521300 | 5.57231300  | -0.90262300 |
| B | -6.24743600 | -0.98249800 | 0.65486400  |

|   |             |             |             |
|---|-------------|-------------|-------------|
| B | 6.30314400  | -0.51151600 | 0.70328100  |
| N | -6.24641600 | 0.43546600  | 0.73790500  |
| N | 6.21071800  | 0.90438100  | 0.63152200  |
| N | 4.82878200  | 2.98634600  | 0.13105300  |
| N | -5.01615000 | 2.64134300  | 0.41508500  |
| N | -3.85349500 | 4.69684000  | -0.30998200 |
| N | 3.48739500  | 4.91625200  | -0.63712500 |
| B | -3.55104200 | -5.07214900 | -0.47753200 |
| B | 3.89640800  | -4.85073200 | -0.08256700 |
| B | -2.73056000 | 5.45974100  | -0.74854500 |
| B | 2.28480800  | 5.59838900  | -0.98838000 |
| N | 2.67721700  | -5.48306600 | -0.43149800 |
| N | 0.21375400  | -5.49990800 | -0.78856200 |
| N | -2.27246800 | -5.61452500 | -0.75835600 |
| H | -2.88297900 | 6.54344200  | -1.22939500 |
| H | -0.27901100 | 6.65353900  | -1.41075500 |
| H | 2.32732900  | 6.67570900  | -1.50466100 |
| H | -5.88171400 | -3.75468200 | 0.19526700  |
| H | -7.26058900 | -1.60292400 | 0.76498800  |
| H | -4.53043200 | -5.75057700 | -0.52288700 |
| H | 4.91138400  | -5.47159300 | -0.00625200 |
| H | 6.11353200  | -3.33852700 | 0.56067000  |
| H | 7.35419800  | -1.04952100 | 0.87454900  |
| H | -7.13504900 | 0.89766000  | 0.87272100  |
| H | -5.87294500 | 3.17758400  | 0.41030400  |
| H | -4.76827400 | 5.11652200  | -0.40146900 |
| H | 4.36272200  | 5.38989700  | -0.81239000 |
| H | 5.64426000  | 3.57991800  | 0.06649400  |

|   |             |             |             |
|---|-------------|-------------|-------------|
| H | 7.06741900  | 1.43431400  | 0.71313900  |
| H | 2.69542700  | -6.47752200 | -0.61002000 |
| H | 0.25177300  | -6.49239300 | -0.97423600 |
| H | -2.21633500 | -6.59804300 | -0.98359800 |

Na@ V<sub>N2B</sub> *h*-BN (reactant)

|    |             |             |             |
|----|-------------|-------------|-------------|
| Na | 0.00002500  | 0.00006700  | 0.00063000  |
| B  | 0.00000000  | 0.00000000  | 2.42558799  |
| B  | 2.29448667  | 0.00000000  | 0.79674153  |
| B  | 2.24606720  | -1.03208340 | 3.15138617  |
| B  | 4.43306245  | -0.85565306 | 1.91962986  |
| B  | 4.43117699  | 0.11132149  | -0.35458783 |
| B  | 2.21235750  | 0.58940655  | -1.15196444 |
| B  | -0.15847680 | 1.25680100  | -2.26641509 |
| B  | -2.06155629 | 1.34719853  | -0.88795874 |
| B  | -1.78978077 | 0.68759239  | 1.72507446  |
| B  | -1.79115780 | 0.08075838  | 4.05642711  |
| B  | 0.31323913  | -1.01171128 | 4.75972471  |
| N  | -0.42664476 | -0.30581486 | 3.75963029  |
| N  | 1.45705122  | -0.33070998 | 2.04179023  |
| N  | 1.64101308  | -1.43052307 | 4.42081303  |
| N  | -2.51733690 | 0.62574872  | 2.96321115  |
| N  | -2.55001588 | 1.02670930  | 0.52476831  |
| N  | -0.74708367 | 1.74720574  | -1.10351577 |
| N  | 1.32099466  | 0.87609520  | -2.27344223 |
| N  | 3.61934893  | 0.53365706  | -1.44012700 |
| N  | 3.70744820  | -0.23070486 | 0.85049886  |
| N  | 3.67399133  | -1.32118756 | 3.04267401  |
| B  | 2.36743188  | -2.18457569 | 5.44447100  |

|   |             |             |             |
|---|-------------|-------------|-------------|
| B | 4.41656431  | -2.04882756 | 4.07330132  |
| B | 4.23093928  | 0.78083328  | -2.72032916 |
| B | 1.91837534  | 0.90240828  | -3.63055230 |
| B | -4.01722424 | 1.16813476  | 0.66766431  |
| B | -3.91158357 | 0.95405198  | 3.13623662  |
| N | -2.37658387 | -0.10610439 | 5.35905452  |
| N | -0.29824753 | -1.28491931 | 6.05480383  |
| N | 5.87533851  | -1.02389785 | 1.81068538  |
| N | 5.86747458  | -0.00207164 | -0.46260117 |
| N | -0.96384249 | 0.94697889  | -3.48335545 |
| N | -2.97712669 | 1.05864304  | -2.02050821 |
| B | -1.61914007 | -0.79841703 | 6.36612271  |
| B | 6.59009842  | -0.56083353 | 0.64675342  |
| B | -2.39589232 | 0.92969561  | -3.32904102 |
| B | -3.74438986 | 0.35039835  | 5.57802335  |
| B | 6.50012065  | 0.37884752  | -1.71355836 |
| N | -4.46443148 | 0.88087801  | 4.47455148  |
| N | 5.67437544  | 0.76319640  | -2.80391472 |
| N | 3.34501189  | 0.96833905  | -3.81207574 |
| N | -4.63388030 | 1.25885365  | 1.96505744  |
| N | -4.86671605 | 1.21106095  | -0.49381630 |
| N | 1.08091781  | 0.87305036  | -4.80139455 |
| B | 0.41827354  | -2.06667095 | 7.02866868  |
| B | 6.59216852  | -1.72344629 | 2.85356545  |
| B | -4.39759639 | 1.04472513  | -1.82995581 |
| B | -0.34382148 | 0.79493122  | -4.75996197 |
| N | 5.83619818  | -2.22988180 | 3.93312613  |
| N | 3.72381808  | -2.54083084 | 5.21280941  |

|   |             |             |             |
|---|-------------|-------------|-------------|
| N | 1.71538266  | -2.51557877 | 6.68280900  |
| H | -5.16972552 | 0.91959166  | -2.73175155 |
| H | -3.09582128 | 0.77670129  | -4.28619359 |
| H | -0.96776517 | 0.63889328  | -5.76317394 |
| H | -2.08190788 | -0.98766070 | 7.44759354  |
| H | -4.24947445 | 0.25638309  | 6.65343336  |
| H | -0.05610004 | -2.31986969 | 8.09315121  |
| H | 7.77392958  | -1.86957112 | 2.80388172  |
| H | 7.78071066  | -0.66874156 | 0.59196360  |
| H | 7.68523693  | 0.34152816  | -1.82620936 |
| H | -5.42327810 | 1.15354712  | 4.62918814  |
| H | -5.63688945 | 1.42248239  | 2.01142367  |
| H | -5.86495643 | 1.24654784  | -0.34561214 |
| H | 1.53204838  | 0.82246421  | -5.70501050 |
| H | 3.70207493  | 1.07118558  | -4.75313382 |
| H | 6.12610160  | 0.98376104  | -3.67941351 |
| H | 6.33316011  | -2.72328516 | 4.66350993  |
| H | 4.23494530  | -3.04064885 | 5.92885343  |
| H | 2.22958909  | -3.05028335 | 7.37151081  |

Na@ V<sub>N2B</sub> *h*-BN (product)

|    |             |             |             |
|----|-------------|-------------|-------------|
| Na | -0.46430200 | -3.29440100 | 2.71431500  |
| B  | 1.32444000  | 0.49994500  | -0.17261800 |
| B  | -1.35729000 | 0.33392300  | -0.09413300 |
| B  | -0.13426600 | 2.53879700  | 0.25104900  |
| B  | -2.59764900 | 2.51873900  | 0.57744200  |
| B  | -3.76056000 | 0.56734500  | -0.32005200 |
| B  | -2.21536700 | -1.19494300 | -0.59044100 |
| B  | -0.92291900 | -3.26551900 | -0.00567900 |

|   |             |             |             |
|---|-------------|-------------|-------------|
| B | 1.28556700  | -3.07980100 | 0.75214400  |
| B | 2.43249400  | -0.95477500 | 0.01315200  |
| B | 3.63306200  | 0.94421600  | -0.76959800 |
| B | 2.21070400  | 2.91002700  | -0.51230800 |
| N | 2.31931300  | 1.49341800  | -0.58578000 |
| N | -0.05172000 | 1.04469500  | 0.03097200  |
| N | 0.98864100  | 3.44300400  | 0.01357100  |
| N | 3.71617300  | -0.43820400 | -0.44332500 |
| N | 2.51173500  | -2.31425700 | 0.53087400  |
| N | 0.01936800  | -2.48617300 | 0.68101000  |
| N | -2.08192700 | -2.63740500 | -0.64749500 |
| N | -3.57663500 | -0.73670500 | -0.85083900 |
| N | -2.54106400 | 1.17475600  | 0.12779800  |
| N | -1.35192200 | 3.21260500  | 0.70366000  |
| B | 0.93122200  | 4.87044200  | 0.27852700  |
| B | -1.40668300 | 4.62103300  | 1.05053000  |
| B | -4.70137700 | -1.52281400 | -1.25525400 |
| B | -3.16303900 | -3.46518400 | -1.17309300 |
| B | 3.79931900  | -2.99561100 | 0.65124300  |
| B | 4.99603600  | -1.08012200 | -0.38078300 |
| N | 4.78504200  | 1.72920200  | -1.14858800 |
| N | 3.35294900  | 3.75263700  | -0.87249800 |
| N | -3.89647300 | 3.15680600  | 0.80905000  |
| N | -5.05849100 | 1.19466500  | -0.21253300 |
| N | -0.82594300 | -4.76570500 | -0.04214900 |
| N | 1.40768600  | -4.55346300 | 1.03263100  |
| B | 4.61853100  | 3.15856800  | -1.23883900 |
| B | -5.11886600 | 2.49478100  | 0.41024700  |

|   |             |             |             |
|---|-------------|-------------|-------------|
| B | 0.32330500  | -5.38416500 | 0.55916700  |
| B | 6.06230500  | 1.04637400  | -1.23307900 |
| B | -6.19613900 | 0.44768100  | -0.71814900 |
| N | 6.13891600  | -0.33018700 | -0.86003500 |
| N | -5.99439100 | -0.86492500 | -1.24857200 |
| N | -4.43032800 | -2.89350900 | -1.55942000 |
| N | 5.01959500  | -2.38519900 | 0.19896600  |
| N | 3.83745500  | -4.32522600 | 1.23052000  |
| N | -2.96927200 | -4.89755300 | -1.23795000 |
| B | 3.24315800  | 5.18034400  | -0.68940700 |
| B | -3.91142400 | 4.50387500  | 1.32815700  |
| B | 2.68659200  | -5.14318000 | 1.35248500  |
| B | -1.84763600 | -5.56119600 | -0.67553200 |
| N | -2.66804800 | 5.17862400  | 1.47976000  |
| N | -0.23144700 | 5.41799400  | 0.90291300  |
| N | 2.05318800  | 5.69249500  | -0.10394200 |
| H | 2.78152900  | -6.28771400 | 1.69030100  |
| H | 0.39081300  | -6.57450200 | 0.66758100  |
| H | -1.77122700 | -6.75518300 | -0.71042000 |
| H | 5.53393600  | 3.85258900  | -1.56261500 |
| H | 7.04467800  | 1.63158000  | -1.57945800 |
| H | 4.13409300  | 5.91471200  | -0.99450700 |
| H | -4.93640800 | 5.05185600  | 1.60379600  |
| H | -6.17117200 | 3.03234100  | 0.58163900  |
| H | -7.29502700 | 0.91653600  | -0.68246700 |
| H | 7.05116900  | -0.76463300 | -0.88221400 |
| H | 5.88603700  | -2.89839200 | 0.28474000  |
| H | 4.73775300  | -4.75507800 | 1.39306100  |



|   |             |             |             |
|---|-------------|-------------|-------------|
| H | -3.69571300 | -5.46894500 | -1.64680500 |
| H | -5.16998000 | -3.51351100 | -1.85991700 |
| H | -6.81557000 | -1.36525700 | -1.55992700 |
| H | -2.69493800 | 6.14153200  | 1.78534400  |
| H | -0.27378800 | 6.40927000  | 1.09454000  |
| H | 1.99673900  | 6.69056400  | 0.04377500  |

Na<sup>+</sup>@ V<sub>N2B</sub> *h*-BN

|    |             |             |             |
|----|-------------|-------------|-------------|
| Na | -0.31007800 | 1.20903400  | -0.30925000 |
| B  | -1.20990100 | -0.86222000 | 0.02330100  |
| B  | 1.48955300  | -0.16037400 | -0.00056000 |
| B  | 0.67684200  | -2.58298500 | -0.19785400 |
| B  | 3.13556000  | -2.09473500 | -0.22518400 |
| B  | 3.86490800  | 0.21983300  | 0.24596800  |
| B  | 2.04626000  | 1.78352700  | 0.12835300  |
| B  | 0.32455300  | 3.77902900  | -0.43213400 |
| B  | -2.08380900 | 3.12688300  | -0.68739300 |
| B  | -2.66724100 | 0.55858300  | -0.07804600 |
| B  | -3.46140500 | -1.66350600 | 0.40432500  |
| B  | -1.67588700 | -3.36184700 | 0.19908700  |
| N  | -2.06080000 | -1.97417000 | 0.23993500  |
| N  | 0.28904400  | -1.08584200 | -0.08118100 |
| N  | -0.30708800 | -3.64555100 | -0.10783500 |
| N  | -3.77908400 | -0.27311000 | 0.23771700  |
| N  | -2.95941200 | 1.99718000  | -0.35459000 |
| N  | -0.71356100 | 3.04735300  | -1.11563100 |
| N  | 1.58297100  | 3.20024800  | 0.04809400  |
| N  | 3.43152700  | 1.58056600  | 0.38408500  |
| N  | 2.79307300  | -0.71807600 | 0.01454000  |

|   |             |             |             |
|---|-------------|-------------|-------------|
| N | 2.05018000  | -3.01231700 | -0.38955000 |
| B | 0.04539600  | -5.05874200 | -0.29274700 |
| B | 2.40963500  | -4.41341700 | -0.63607000 |
| B | 4.42326500  | 2.59743900  | 0.67277200  |
| B | 2.58074800  | 4.25672100  | 0.43363000  |
| B | -4.39961100 | 2.42148800  | -0.27120200 |
| B | -5.16832100 | 0.13079000  | 0.33963200  |
| N | -4.45141800 | -2.65845000 | 0.68067100  |
| N | -2.67487200 | -4.38739700 | 0.42339000  |
| N | 4.53112500  | -2.48374500 | -0.27834000 |
| N | 5.24011300  | -0.16668700 | 0.31199000  |
| N | -0.06404400 | 5.17526700  | -0.29341200 |
| N | -2.47047500 | 4.53179900  | -0.62990500 |
| B | -4.04738300 | -4.04642600 | 0.70429400  |
| B | 5.58196900  | -1.54088100 | 0.01743500  |
| B | -1.45166500 | 5.54801000  | -0.47236700 |
| B | -5.83423200 | -2.24298300 | 0.84525900  |
| B | 6.23316500  | 0.84773700  | 0.62520000  |
| N | -6.14568800 | -0.86159700 | 0.67768100  |
| N | 5.78934800  | 2.18929000  | 0.82421000  |
| N | 3.92603800  | 3.92439900  | 0.76945600  |
| N | -5.42915900 | 1.50134800  | 0.07786700  |
| N | -4.77404900 | 3.78370000  | -0.54573400 |
| N | 2.20127100  | 5.64355000  | 0.44066600  |
| B | -2.29765200 | -5.78122600 | 0.28509200  |
| B | 4.86483800  | -3.85488800 | -0.61395800 |
| B | -3.87808700 | 4.86954800  | -0.65469100 |
| B | 0.92401800  | 6.15015200  | 0.11565900  |

|   |             |             |             |
|---|-------------|-------------|-------------|
| N | 3.79138700  | -4.75803900 | -0.81774300 |
| N | 1.37970400  | -5.39247400 | -0.65088200 |
| N | -0.96227300 | -6.06181900 | -0.09695600 |
| H | -4.24610200 | 5.99620500  | -0.74136000 |
| H | -1.76932500 | 6.69057700  | -0.40606800 |
| H | 0.66264500  | 7.30771800  | 0.18216900  |
| H | -4.84683300 | -4.89729200 | 0.92740400  |
| H | -6.68348500 | -3.03550300 | 1.10023200  |
| H | -3.08529400 | -6.65302000 | 0.47092000  |
| H | 5.99713100  | -4.20731700 | -0.70776800 |
| H | 6.71952800  | -1.88604200 | 0.01641200  |
| H | 7.38557600  | 0.56642000  | 0.71137800  |
| H | -7.11534400 | -0.59163100 | 0.77528900  |
| H | -6.37666100 | 1.85087600  | 0.13230200  |
| H | -5.76209500 | 4.00079600  | -0.54314000 |
| H | 2.90710100  | 6.31532300  | 0.71235800  |
| H | 4.55765900  | 4.68239400  | 0.99183200  |
| H | 6.49560800  | 2.88148300  | 1.03566100  |
| H | 4.02613300  | -5.71946700 | -1.02509200 |
| H | 1.62417900  | -6.36320600 | -0.79230900 |
| H | -0.70413600 | -7.03322200 | -0.20727100 |

Na<sup>+</sup>@ V<sub>N2B</sub> *h*-BN (reactant)

|    |            |             |             |
|----|------------|-------------|-------------|
| Na | 0.00000000 | 0.00000000  | 0.00000000  |
| B  | 0.00000000 | 0.00000000  | 2.39694422  |
| B  | 2.25027086 | 0.00000000  | 0.76428286  |
| B  | 2.07509004 | -1.43453272 | 2.88916282  |
| B  | 4.16577586 | -1.51436961 | 1.50551978  |
| B  | 4.35623622 | 0.05075047  | -0.39940997 |

|   |             |             |             |
|---|-------------|-------------|-------------|
| B | 2.24329893  | 1.07170681  | -0.95458964 |
| B | -0.03281488 | 1.93804210  | -2.13162039 |
| B | -2.11986767 | 1.69097508  | -0.77598090 |
| B | -1.74376669 | 0.87449683  | 1.76842958  |
| B | -1.73487685 | 0.13471427  | 4.07274434  |
| B | 0.27350578  | -1.21225849 | 4.61912916  |
| N | -0.41651571 | -0.34289876 | 3.70135443  |
| N | 1.37503733  | -0.44866140 | 1.91676339  |
| N | 1.49143617  | -1.80891127 | 4.15694858  |
| N | -2.44094875 | 0.79981831  | 3.01736455  |
| N | -2.50786369 | 1.43291520  | 0.60854123  |
| N | -1.00971190 | 1.11157544  | -1.47501215 |
| N | 1.41845109  | 1.81403103  | -1.95963010 |
| N | 3.63504056  | 0.96343261  | -1.24317227 |
| N | 3.57640110  | -0.49488916 | 0.67966030  |
| N | 3.37128116  | -2.01137105 | 2.58779152  |
| B | 2.12657373  | -2.78957843 | 5.04925502  |
| B | 3.98968843  | -3.03745229 | 3.43950249  |
| B | 4.35499747  | 1.60402135  | -2.32699463 |
| B | 2.16199716  | 2.54939395  | -3.03643254 |
| B | -3.90829822 | 1.89098466  | 0.87967214  |
| B | -3.79249524 | 1.26045232  | 3.28997668  |
| N | -2.28549084 | -0.07447476 | 5.37611315  |
| N | -0.29096584 | -1.46351588 | 5.92747663  |
| N | 5.51548327  | -1.96771559 | 1.22921737  |
| N | 5.72509024  | -0.30911513 | -0.63084523 |
| N | -0.71629875 | 2.84393428  | -3.03739752 |
| N | -2.84367436 | 2.53599461  | -1.72066383 |

|   |             |             |             |
|---|-------------|-------------|-------------|
| B | -1.54764238 | -0.86824085 | 6.32978625  |
| B | 6.30725759  | -1.35182825 | 0.18789920  |
| B | -2.13631350 | 3.07636370  | -2.86789976 |
| B | -3.61134262 | 0.46004457  | 5.66657582  |
| B | 6.45038677  | 0.35750463  | -1.69559899 |
| N | -4.30965716 | 1.11862045  | 4.61544495  |
| N | 5.75367048  | 1.31683481  | -2.49162435 |
| N | 3.58516203  | 2.46114451  | -3.15927578 |
| N | -4.48627975 | 1.81070503  | 2.17689557  |
| N | -4.71149717 | 2.44842445  | -0.18106937 |
| N | 1.45179193  | 3.35225192  | -3.99178032 |
| B | 0.36961649  | -2.39731534 | 6.81888113  |
| B | 6.07421761  | -3.03764438 | 2.02400343  |
| B | -4.23049878 | 2.85089201  | -1.45257217 |
| B | 0.05229551  | 3.54853324  | -4.04109185 |
| N | 5.27842830  | -3.55891741 | 3.08140800  |
| N | 3.31255679  | -3.44507095 | 4.62054849  |
| N | 1.54383830  | -3.03866532 | 6.33699317  |
| H | -4.90460940 | 3.42484684  | -2.23998009 |
| H | -2.71739001 | 3.77591930  | -3.63030230 |
| H | -0.46318548 | 4.25937751  | -4.83678065 |
| H | -1.97821028 | -1.05204538 | 7.41938719  |
| H | -4.09013566 | 0.34719482  | 6.74758631  |
| H | -0.05418984 | -2.61874726 | 7.90679734  |
| H | 7.16438626  | -3.46360689 | 1.80802746  |
| H | 7.43009875  | -1.69763884 | 0.00653766  |
| H | 7.59762031  | 0.11669516  | -1.89370653 |
| H | -5.23602622 | 1.46265214  | 4.82382211  |

|   |             |             |             |
|---|-------------|-------------|-------------|
| H | -5.43257298 | 2.15617843  | 2.30237201  |
| H | -5.67132871 | 2.67712212  | 0.03568489  |
| H | 2.00853775  | 3.83437731  | -4.69488404 |
| H | 4.02189727  | 2.96111597  | -3.91808879 |
| H | 6.27233013  | 1.76206823  | -3.23276313 |
| H | 5.67856449  | -4.28668555 | 3.64840797  |
| H | 3.74723983  | -4.12863010 | 5.22723245  |
| H | 1.99430286  | -3.69762254 | 6.95600862  |

Na<sup>+</sup>@ V<sub>N2B</sub> *h*-BN (product)

|    |             |             |             |
|----|-------------|-------------|-------------|
| Na | -0.01770800 | -1.34769300 | -2.05293700 |
| B  | -0.97163100 | 1.02922500  | -0.21867600 |
| B  | 1.37557500  | -0.31117800 | -0.18092700 |
| B  | 1.26359200  | 2.19064200  | -0.35188600 |
| B  | 3.44692800  | 1.10710600  | -0.77023600 |
| B  | 3.60555000  | -1.21589200 | 0.01464300  |
| B  | 1.42829600  | -2.10041800 | 0.39847200  |
| B  | -0.73489200 | -3.42697700 | 0.20711400  |
| B  | -2.74130300 | -2.28068000 | -0.79189200 |
| B  | -2.65858600 | 0.22667600  | -0.52398700 |
| B  | -2.84562200 | 2.29324100  | 0.63399400  |
| B  | -0.65414600 | 3.34503300  | 0.76032400  |
| N  | -1.40812400 | 2.11642600  | 0.62028000  |
| N  | 0.50171200  | 0.86478300  | -0.38840200 |
| N  | 0.65538300  | 3.39264400  | 0.16622200  |
| N  | -3.54078900 | 1.25417800  | -0.05541000 |
| N  | -3.35261400 | -0.99508000 | -0.94028500 |
| N  | -1.32468500 | -2.42045500 | -0.63982000 |
| N  | 0.61311000  | -3.27622700 | 0.68472800  |

|   |             |             |             |
|---|-------------|-------------|-------------|
| N | 2.83916200  | -2.29903700 | 0.54921500  |
| N | 2.78432000  | -0.11304700 | -0.40890900 |
| N | 2.64128100  | 2.28820900  | -0.78279500 |
| B | 1.36548200  | 4.67337200  | 0.14565600  |
| B | 3.33325800  | 3.56911000  | -0.90151400 |
| B | 3.50979900  | -3.47162700 | 1.06083500  |
| B | 1.24307100  | -4.47818600 | 1.28194400  |
| B | -4.82699100 | -1.00322800 | -1.09152400 |
| B | -4.98291600 | 1.27996800  | -0.14203300 |
| N | -3.51111500 | 3.41888800  | 1.21553300  |
| N | -1.27536800 | 4.51076400  | 1.36206500  |
| N | 4.88228400  | 1.10989700  | -0.97937300 |
| N | 5.03178500  | -1.22510600 | -0.08220400 |
| N | -1.52466400 | -4.63380300 | 0.36568000  |
| N | -3.46927000 | -3.53891500 | -0.79462900 |
| B | -2.69275400 | 4.52803800  | 1.65677200  |
| B | 5.67880300  | -0.05287200 | -0.64508600 |
| B | -2.86523400 | -4.70330900 | -0.18678900 |
| B | -4.96411400 | 3.45584000  | 1.14461200  |
| B | 5.72122500  | -2.39703900 | 0.44191300  |
| N | -5.65069700 | 2.39788500  | 0.46733300  |
| N | 4.94860800  | -3.46220300 | 1.01024000  |
| N | 2.65426600  | -4.51933800 | 1.52540900  |
| N | -5.59155500 | 0.17158400  | -0.81391500 |
| N | -5.45293200 | -2.25167300 | -1.45557100 |
| N | 0.40181200  | -5.61862900 | 1.53663600  |
| B | -0.52084300 | 5.74903900  | 1.42984500  |
| B | 5.50909500  | 2.37051700  | -1.34399800 |

|   |             |             |             |
|---|-------------|-------------|-------------|
| B | -4.85236400 | -3.52037600 | -1.24496200 |
| B | -0.93381600 | -5.75490700 | 1.07807900  |
| N | 4.70694000  | 3.54717400  | -1.33209900 |
| N | 2.63213700  | 4.75033200  | -0.51596000 |
| N | 0.75742800  | 5.79267500  | 0.80737900  |
| H | -5.46042500 | -4.53177000 | -1.39597800 |
| H | -3.48776700 | -5.71234500 | -0.09843700 |
| H | -1.55251000 | -6.75457100 | 1.25991100  |
| H | -3.18829200 | 5.47106600  | 2.18525700  |
| H | -5.57223400 | 4.35915500  | 1.62537400  |
| H | -0.97347700 | 6.71307400  | 1.96122700  |
| H | 6.66802300  | 2.42378800  | -1.61039700 |
| H | 6.85837700  | -0.03630200 | -0.79796000 |
| H | 6.90863100  | -2.46988300 | 0.40293200  |
| H | -6.65966900 | 2.45876400  | 0.43460800  |
| H | -6.59821900 | 0.12522300  | -0.90158100 |
| H | -6.43911300 | -2.24761600 | -1.68191900 |
| H | 0.80888800  | -6.42179500 | 1.99796400  |
| H | 3.05163900  | -5.36978500 | 1.90244900  |
| H | 5.46689500  | -4.25667600 | 1.36137800  |
| H | 5.17887900  | 4.42382000  | -1.50986300 |
| H | 3.11307100  | 5.63953000  | -0.54544200 |
| H | 1.25586600  | 6.67188300  | 0.83991200  |

K<sup>+</sup>@Pristine *h*-BN

|   |             |             |             |
|---|-------------|-------------|-------------|
| K | -0.30538100 | 0.03874400  | -1.47142000 |
| B | -1.41791400 | 2.18623800  | -1.62932300 |
| B | 0.16377800  | -2.43155700 | -1.47512300 |
| B | 1.18248000  | 2.00939300  | -1.79247200 |



|   |             |             |             |
|---|-------------|-------------|-------------|
| B | -2.20948200 | -2.03754000 | -0.97476600 |
| B | -0.95755400 | -3.78937200 | 0.30792400  |
| B | 1.51755500  | -3.61295500 | 0.29585800  |
| B | 2.46104300  | -1.61741000 | -0.90606000 |
| B | 3.48256400  | 0.94167800  | -0.88159000 |
| B | 2.27543600  | 3.10098000  | -0.02525600 |
| B | -0.19034400 | 3.40826300  | -0.28135200 |
| B | -2.66477100 | 2.84246200  | -0.04805000 |
| B | -3.57935400 | 0.46873200  | -0.92298100 |
| N | -2.49972300 | 1.66803400  | -1.06090600 |
| N | -1.17797000 | -2.05211800 | -1.90083500 |
| N | -3.36919700 | -0.95002700 | -0.87539000 |
| N | -1.48687900 | 3.61148100  | 0.29499500  |
| N | -0.12833200 | 2.65824600  | -1.60257800 |
| N | 1.02509900  | 3.75618100  | 0.32471200  |
| N | 2.23526600  | 1.89555100  | -0.93321600 |
| N | 1.34714100  | -1.62779500 | -1.73872500 |
| N | 3.51860400  | -0.49055200 | -0.84585400 |
| N | 2.64203600  | -2.75048700 | 0.01647200  |
| N | 0.25358300  | -3.39265400 | -0.36400400 |
| N | -2.20827200 | -3.09654900 | 0.03569800  |
| B | -4.64339600 | -1.69030100 | -0.54866700 |
| B | -3.43049500 | -3.59537600 | 0.59674100  |
| B | 3.93888700  | -3.11857700 | 0.51260100  |
| B | 4.87631900  | -1.05608800 | -0.59019300 |
| B | 0.97340200  | 4.74519600  | 1.41218500  |
| B | -1.56697500 | 4.59329600  | 1.39881500  |
| N | -3.93785400 | 3.11167600  | 0.48053500  |

|   |             |             |             |
|---|-------------|-------------|-------------|
| N | -4.87363900 | 1.09931500  | -0.70090000 |
| N | -0.89787300 | -4.81363900 | 1.33956900  |
| N | 1.60841000  | -4.66511400 | 1.30163900  |
| N | 4.69617400  | 1.74516800  | -0.71386800 |
| N | 3.50047800  | 3.59209900  | 0.48269200  |
| B | -5.07750000 | 2.34589100  | -0.02381200 |
| B | 0.39892600  | -5.29585400 | 1.77893900  |
| B | 4.73241200  | 3.00733100  | -0.04398000 |
| B | -4.06175600 | 4.18737100  | 1.46403000  |
| B | 2.91484600  | -5.00443800 | 1.82759500  |
| N | -2.88017200 | 4.85888500  | 1.90347200  |
| N | 4.04858500  | -4.25150800 | 1.38964300  |
| N | 5.04331800  | -2.31843600 | 0.04871500  |
| N | -0.33388800 | 5.16547000  | 1.85556300  |
| N | 2.23261800  | 5.18608200  | 1.91625100  |
| N | 6.03880200  | -0.27819800 | -0.95665400 |
| B | -6.08469900 | 0.29536500  | -0.91363200 |
| B | -2.13312000 | -5.29296900 | 1.91951300  |
| B | 3.49030700  | 4.68210100  | 1.44649900  |
| B | 6.00159700  | 1.12446400  | -0.95392200 |
| N | -3.37158400 | -4.69281300 | 1.51448700  |
| N | -4.63156200 | -2.93302800 | 0.14202100  |
| N | -5.91001700 | -1.09472100 | -0.91574600 |
| H | 4.50968100  | 5.13138700  | 1.85845500  |
| H | 5.76020900  | 3.57392300  | 0.13921900  |
| H | 6.97706900  | 1.79230900  | -1.08169600 |
| H | -6.17371900 | 2.74911900  | 0.18505800  |
| H | -5.12728800 | 4.47480200  | 1.90062100  |

|   |             |             |             |
|---|-------------|-------------|-------------|
| H | -7.14643600 | 0.81661100  | -1.02279400 |
| H | -2.13287700 | -6.17091600 | 2.72517500  |
| H | 0.46071700  | -6.18056900 | 2.57441300  |
| H | 3.04799000  | -5.89129800 | 2.61288900  |
| H | -3.00308100 | 5.55931500  | 2.62373000  |
| H | -0.37951300 | 5.85148100  | 2.59901800  |
| H | 2.26971700  | 5.90286400  | 2.62934400  |
| H | 6.93963100  | -0.73457900 | -1.00961900 |
| H | 5.98734800  | -2.59881000 | 0.27912400  |
| H | 4.95201000  | -4.52105500 | 1.75450400  |
| H | -4.21872100 | -5.06018200 | 1.92596300  |
| H | -5.53094100 | -3.31383300 | 0.40611700  |
| H | -6.73255400 | -1.68217500 | -0.95466000 |

K<sup>+</sup>@Pristine *h*-BN (reactant)

|   |             |             |             |
|---|-------------|-------------|-------------|
| K | 0.00166800  | 0.00417700  | 2.69820500  |
| B | -1.28369100 | 0.69470200  | -0.10223300 |
| B | 0.03976700  | -1.45931100 | -0.10164100 |
| B | 1.24357500  | 0.76379300  | -0.10259000 |
| B | -2.48201300 | -1.52504800 | -0.10152900 |
| B | -1.16024500 | -3.66199000 | -0.13713500 |
| B | 1.35836900  | -3.59313800 | -0.13827800 |
| B | 2.56140800  | -1.38719100 | -0.10277900 |
| B | 3.75123800  | 0.82594500  | -0.13708000 |
| B | 2.43227400  | 2.97265200  | -0.13763500 |
| B | -0.07972600 | 2.91147800  | -0.10354400 |
| B | -2.59128400 | 2.83530600  | -0.13868300 |
| B | -3.79099200 | 0.61977600  | -0.13724600 |
| N | -2.54818400 | 1.37942800  | -0.11200200 |

|   |             |             |             |
|---|-------------|-------------|-------------|
| N | -1.23370000 | -0.75812300 | -0.04117500 |
| N | -3.74335300 | -0.82650000 | -0.11962500 |
| N | -1.35406200 | 3.58593200  | -0.12209100 |
| N | -0.03965500 | 1.44702800  | -0.04239200 |
| N | 1.15591800  | 3.65454300  | -0.12139200 |
| N | 2.46881000  | 1.51657900  | -0.11177900 |
| N | 1.27311200  | -0.68960200 | -0.04184700 |
| N | 3.78273300  | -0.62078300 | -0.12054600 |
| N | 2.58715800  | -2.82875900 | -0.12150200 |
| N | 0.07910600  | -2.89672900 | -0.11150900 |
| N | -2.42892400 | -2.96588800 | -0.11962700 |
| B | -4.98898600 | -1.58889700 | -0.15900500 |
| B | -3.67199700 | -3.73244000 | -0.15905700 |
| B | 3.87022200  | -3.52621300 | -0.16188400 |
| B | 5.06813800  | -1.31395500 | -0.16036300 |
| B | 1.11841300  | 5.11441700  | -0.16143000 |
| B | -1.39643700 | 5.04568100  | -0.16241200 |
| N | -3.86814300 | 3.51598200  | -0.16863400 |
| N | -5.05887200 | 1.31705100  | -0.16714900 |
| N | -1.11122900 | -5.10810800 | -0.16728100 |
| N | 1.38854100  | -5.03976300 | -0.16869900 |
| N | 4.97916400  | 1.59145900  | -0.16585600 |
| N | 3.67008800  | 3.72205200  | -0.16645900 |
| B | -5.09644400 | 2.75922300  | -0.18647800 |
| B | 0.15831700  | -5.79342000 | -0.18671500 |
| B | 4.93785800  | 3.03353700  | -0.18414300 |
| B | -3.90963800 | 4.96728900  | -0.19793400 |
| B | 2.66446700  | -5.73266100 | -0.19822500 |

|   |             |             |             |
|---|-------------|-------------|-------------|
| N | -2.68187200 | 5.68356800  | -0.19010100 |
| N | 3.85832100  | -4.96117200 | -0.19021700 |
| N | 5.06993000  | -2.74534600 | -0.16635000 |
| N | -0.15766000 | 5.76291100  | -0.16715200 |
| N | 2.36714400  | 5.82157000  | -0.18788100 |
| N | 6.26332100  | -0.51960900 | -0.18656800 |
| B | -6.29695600 | 0.55857900  | -0.19510500 |
| B | -2.34741400 | -5.86970400 | -0.19539400 |
| B | 3.63219500  | 5.17346500  | -0.19509900 |
| B | 6.25681100  | 0.90178000  | -0.19403800 |
| N | -3.58165800 | -5.16462800 | -0.18652600 |
| N | -4.91256600 | -3.01827900 | -0.16365300 |
| N | -6.22577400 | -0.86105000 | -0.18624900 |
| H | 4.63996800  | 5.80639000  | -0.22188900 |
| H | 5.95112100  | 3.65609200  | -0.21020100 |
| H | 7.27685400  | 1.51473200  | -0.22065800 |
| H | -6.14219500 | 3.32544800  | -0.21361600 |
| H | -4.95045100 | 5.54419200  | -0.22572600 |
| H | -7.34895200 | 1.11487500  | -0.22275400 |
| H | -2.32673600 | -7.05954000 | -0.22316800 |
| H | 0.19072700  | -6.98218300 | -0.21408700 |
| H | 2.70869200  | -6.92184800 | -0.22647600 |
| H | -2.73405400 | 6.69289700  | -0.21889200 |
| H | -0.18520700 | 6.77341800  | -0.20148600 |
| H | 2.36423700  | 6.83225300  | -0.21630800 |
| H | 7.16356300  | -0.97901200 | -0.21487100 |
| H | 5.95881300  | -3.22674800 | -0.20101700 |
| H | 4.73504200  | -5.46397100 | -0.21933000 |

|   |             |             |             |
|---|-------------|-------------|-------------|
| H | -4.42961100 | -5.71460800 | -0.21486400 |
| H | -5.77388600 | -3.54745000 | -0.19799600 |
| H | -7.09960400 | -1.36891000 | -0.21444800 |

K@V<sub>B</sub> h-BN

|   |             |             |             |
|---|-------------|-------------|-------------|
| K | -1.49474100 | 0.29423000  | 0.27588000  |
| B | 0.68606500  | -1.45390200 | 0.41573200  |
| B | 1.06488700  | 1.16989700  | -0.29462600 |
| B | -1.62281200 | -2.34366000 | 0.75512200  |
| B | 0.25307900  | -3.86366300 | 0.01583100  |
| B | 2.58961400  | -2.92957400 | -0.21824700 |
| B | 2.91574300  | -0.43014900 | 0.01026500  |
| B | 3.33874300  | 2.06316100  | 0.17406500  |
| B | 1.36593100  | 3.62885200  | 0.00987400  |
| B | -0.90551400 | 2.68877100  | -0.47247700 |
| B | -3.55274200 | 1.80790600  | 0.16109000  |
| B | -3.92776300 | -0.64788600 | 0.64202300  |
| N | -3.51176700 | 0.66769000  | 1.04391100  |
| N | -0.52025400 | -1.54262200 | 1.16672500  |
| N | -3.13446300 | -1.94898100 | 0.63524000  |
| N | -2.42755100 | 2.75501300  | -0.22404400 |
| N | -0.13445600 | 1.57912000  | -0.95703100 |
| N | -0.06746800 | 3.84216500  | -0.17272500 |
| N | 1.93097400  | 2.29470100  | 0.02335700  |
| N | 1.46517900  | -0.21935200 | 0.05848100  |
| N | 3.83386000  | 0.70425900  | 0.08365100  |
| N | 3.46368500  | -1.77534300 | -0.12309200 |
| N | 1.18388300  | -2.75500900 | 0.00205700  |
| N | -1.17277400 | -3.66178900 | 0.28561600  |

|   |             |             |             |
|---|-------------|-------------|-------------|
| B | -4.00383000 | -3.12087700 | 0.39285500  |
| B | -2.09018600 | -4.76139600 | 0.14351400  |
| B | 4.89753300  | -1.97836800 | -0.21793300 |
| B | 5.26902400  | 0.48731900  | 0.09215000  |
| B | -0.63803300 | 5.16499000  | -0.14420500 |
| B | -2.93777000 | 4.12439500  | -0.43582400 |
| N | -4.90970800 | 1.95370500  | -0.38218400 |
| N | -5.28490800 | -0.53391900 | 0.06308500  |
| N | 0.75789500  | -5.18978500 | -0.30942100 |
| N | 3.09944100  | -4.26844700 | -0.47351400 |
| N | 4.22162000  | 3.20698700  | 0.35211500  |
| N | 2.24183000  | 4.76539600  | 0.23742300  |
| B | -5.75775900 | 0.77186000  | -0.37991000 |
| B | 2.17662300  | -5.37859300 | -0.53739900 |
| B | 3.66550600  | 4.54055000  | 0.40013600  |
| B | -5.31387800 | 3.27381000  | -0.80684900 |
| B | 4.52912000  | -4.45184700 | -0.60312600 |
| N | -4.34887000 | 4.31466400  | -0.70650100 |
| N | 5.37901600  | -3.31826800 | -0.45646700 |
| N | 5.76867600  | -0.84658700 | -0.07552700 |
| N | -2.05250700 | 5.26074900  | -0.38261700 |
| N | 0.26073000  | 6.26668200  | 0.08522400  |
| N | 6.12664700  | 1.63624300  | 0.26747600  |
| B | -6.08324400 | -1.73002600 | -0.05885200 |
| B | -0.16889600 | -6.30113000 | -0.38527200 |
| B | 1.66811900  | 6.09732600  | 0.27069000  |
| B | 5.64925200  | 2.97004700  | 0.41155500  |
| N | -1.55795600 | -6.06369400 | -0.16757800 |

|   |             |             |             |
|---|-------------|-------------|-------------|
| N | -3.47944500 | -4.45842500 | 0.30381400  |
| N | -5.43360600 | -2.95776300 | 0.21276600  |
| H | 2.36202300  | 7.05158000  | 0.45064200  |
| H | 4.38955400  | 5.47413900  | 0.56482600  |
| H | 6.41505400  | 3.87284400  | 0.56508700  |
| H | -6.86220000 | 0.85936200  | -0.82133200 |
| H | -6.42140200 | 3.49011000  | -1.19471800 |
| H | -7.22991800 | -1.68877900 | -0.38593700 |
| H | 0.21840200  | -7.40207100 | -0.63540300 |
| H | 2.58985800  | -6.47268600 | -0.77304300 |
| H | 4.99298300  | -5.53060400 | -0.81844100 |
| H | -4.65845800 | 5.24900900  | -0.93821300 |
| H | -2.47075900 | 6.17755600  | -0.46895700 |
| H | -0.09788000 | 7.21104500  | 0.11970700  |
| H | 7.12762700  | 1.49921300  | 0.29798700  |
| H | 6.76842100  | -0.99339000 | -0.10659100 |
| H | 6.37414200  | -3.47336200 | -0.54173500 |
| H | -2.18239600 | -6.85431200 | -0.24778400 |
| H | -4.15120100 | -5.20157800 | 0.16410100  |
| H | -5.98175800 | -3.79924600 | 0.09547000  |

K@V<sub>B</sub> *h*-BN (reactant)

|   |             |             |             |
|---|-------------|-------------|-------------|
| K | 1.40009200  | -0.58452500 | 2.53817900  |
| B | -1.33664000 | -0.82172600 | 0.22013700  |
| B | -0.17705400 | 1.36488300  | 0.06113700  |
| B | 0.14568300  | -2.77490400 | 0.15184400  |
| B | -2.37293100 | -3.05272500 | -0.07129000 |
| B | -3.82256400 | -1.00259300 | -0.08045100 |
| B | -2.71059600 | 1.24777400  | -0.00348400 |



|   |             |             |             |
|---|-------------|-------------|-------------|
| B | -1.59082800 | 3.47597000  | -0.02694200 |
| B | 0.91098000  | 3.65407000  | -0.07589200 |
| B | 2.36441200  | 1.56411400  | -0.06728900 |
| B | 3.88226800  | -0.40683600 | -0.03857300 |
| B | 2.71258800  | -2.56899400 | 0.02526100  |
| N | 2.79713100  | -1.19038800 | 0.37101800  |
| N | -0.10996500 | -1.42208600 | 0.53006400  |
| N | 1.48436100  | -3.37239900 | 0.05005400  |
| N | 3.70686200  | 1.02909600  | -0.15419800 |
| N | 1.15098700  | 0.80027500  | 0.09530300  |
| N | 2.21625100  | 3.03330400  | -0.12134400 |
| N | -0.28141200 | 2.83762100  | 0.00300100  |
| N | -1.41610600 | 0.62261100  | 0.10073100  |
| N | -2.80347000 | 2.69065300  | -0.03731200 |
| N | -3.91720900 | 0.44074200  | -0.06074000 |
| N | -2.53500100 | -1.62505900 | 0.03603200  |
| N | -1.04687900 | -3.63245500 | -0.05519700 |
| B | 1.58740900  | -4.80983200 | -0.17773200 |
| B | -0.91346400 | -5.06292500 | -0.20600300 |
| B | -5.21692200 | 1.07291200  | -0.14763500 |
| B | -4.10668100 | 3.32757600  | -0.09331600 |
| B | 3.39715300  | 3.87492100  | -0.27190200 |
| B | 4.86932400  | 1.85938900  | -0.37103000 |
| N | 5.18487000  | -1.01952400 | -0.32630000 |
| N | 4.01073000  | -3.23023400 | -0.29147700 |
| N | -3.56570400 | -3.88270300 | -0.22633000 |
| N | -5.01283400 | -1.83227700 | -0.21289800 |
| N | -1.69248900 | 4.93127400  | -0.05535700 |

|   |             |             |             |
|---|-------------|-------------|-------------|
| N | 0.79009200  | 5.11058500  | -0.11437600 |
| B | 5.21863700  | -2.45431500 | -0.42945500 |
| B | -4.86958100 | -3.26743600 | -0.27828800 |
| B | -0.50312500 | 5.73571800  | -0.08862500 |
| B | 6.33412700  | -0.18390100 | -0.55965700 |
| B | -6.30901500 | -1.19626500 | -0.28627700 |
| N | 6.15665700  | 1.22943600  | -0.53584900 |
| N | -6.38045400 | 0.22582400  | -0.24009000 |
| N | -5.28213300 | 2.50637800  | -0.13965100 |
| N | 4.69015200  | 3.27845200  | -0.39971000 |
| N | 3.23238900  | 5.30633700  | -0.29312700 |
| N | -4.15855200 | 4.76628600  | -0.10044700 |
| B | 4.08428300  | -4.66197400 | -0.43297200 |
| B | -3.41678600 | -5.31607200 | -0.34774300 |
| B | 1.96827800  | 5.94012400  | -0.21348200 |
| B | -2.98969600 | 5.57245800  | -0.08343000 |
| N | -2.10670800 | -5.86678600 | -0.33082300 |
| N | 0.40364200  | -5.61902200 | -0.22807900 |
| N | 2.88446600  | -5.41321800 | -0.34086500 |
| H | 1.88144200  | 7.13049700  | -0.23371900 |
| H | -0.58902400 | 6.92524400  | -0.10354300 |
| H | -3.07799600 | 6.76295400  | -0.09574800 |
| H | 6.25397400  | -3.00513500 | -0.65691900 |
| H | 7.41248000  | -0.65617300 | -0.76637900 |
| H | 5.12778500  | -5.21187200 | -0.62428500 |
| H | -4.37092800 | -6.02534400 | -0.46234300 |
| H | -5.84197300 | -3.95173600 | -0.38290100 |
| H | -7.30635300 | -1.84597700 | -0.38356800 |

|   |             |             |             |
|---|-------------|-------------|-------------|
| H | 6.96881600  | 1.80777700  | -0.69981800 |
| H | 5.49232600  | 3.87758600  | -0.53697200 |
| H | 4.05123700  | 5.89174600  | -0.38113600 |
| H | -5.05362500 | 5.23405800  | -0.13015100 |
| H | -6.18604700 | 2.95549200  | -0.19554000 |
| H | -7.29674800 | 0.64789700  | -0.29908000 |
| H | -2.01811200 | -6.86897900 | -0.42609800 |
| H | 0.51224000  | -6.61440400 | -0.36759100 |
| H | 2.94477500  | -6.41374900 | -0.46838000 |

K<sup>+</sup>@V<sub>B</sub> h-BN

|   |             |             |             |
|---|-------------|-------------|-------------|
| K | 1.47513900  | 0.00231100  | 0.93993400  |
| B | -0.89119200 | -1.39244000 | 0.72303000  |
| B | -0.89551200 | 1.38967900  | 0.72309100  |
| B | 1.36296600  | -2.68540400 | 0.58012700  |
| B | -0.80764600 | -3.78813100 | -0.05632400 |
| B | -2.99499500 | -2.52139600 | 0.01488900  |
| B | -2.93631600 | -0.00454700 | 0.31211700  |
| B | -3.00294100 | 2.51216200  | 0.01546600  |
| B | -0.81957000 | 3.78569800  | -0.05602100 |
| B | 1.35457800  | 2.68965300  | 0.57987400  |
| B | 3.80501000  | 1.30346400  | 0.42639700  |
| B | 3.80911100  | -1.29163100 | 0.42677600  |
| N | 3.68639700  | 0.00581900  | 1.08358500  |
| N | 0.36649800  | -1.88236500 | 1.29407000  |
| N | 2.84648900  | -2.44933300 | 0.36850500  |
| N | 2.83876900  | 2.45815000  | 0.36794100  |
| N | 0.36074300  | 1.88345900  | 1.29394900  |
| N | 0.64321600  | 3.82095300  | 0.03872200  |

|   |             |             |             |
|---|-------------|-------------|-------------|
| N | -1.56559900 | 2.54752900  | 0.18553200  |
| N | -1.45989800 | -0.00226200 | 0.64356100  |
| N | -3.66950300 | 1.24063800  | 0.15634400  |
| N | -3.66556300 | -1.25200500 | 0.15600400  |
| N | -1.55757400 | -2.55230600 | 0.18519200  |
| N | 0.65521000  | -3.81886700 | 0.03878200  |
| B | 3.52893600  | -3.69595600 | -0.11733500 |
| B | 1.38340100  | -5.02158300 | -0.32581400 |
| B | -5.12628600 | -1.25345600 | 0.03508700  |
| B | -5.13021800 | 1.23752500  | 0.03551200  |
| B | 1.36760400  | 5.02585900  | -0.32621900 |
| B | 3.51723700  | 3.70676500  | -0.11837500 |
| N | 5.09521400  | 1.28275600  | -0.25150900 |
| N | 5.09933100  | -1.26709300 | -0.25097900 |
| N | -1.51690800 | -4.97874200 | -0.45039600 |
| N | -3.69469100 | -3.74978800 | -0.28669700 |
| N | -3.70653600 | 3.73842500  | -0.28571200 |
| N | -1.53261300 | 4.97413900  | -0.44981000 |
| B | 5.74629800  | 0.00881800  | -0.52474000 |
| B | -2.96411000 | -4.96777700 | -0.52459800 |
| B | -2.97980100 | 4.95871100  | -0.52360300 |
| B | 5.71437600  | 2.54290500  | -0.61145200 |
| B | -5.14546900 | -3.74363400 | -0.34326800 |
| N | 4.92272900  | 3.70000600  | -0.42980900 |
| N | -5.80718300 | -2.50534500 | -0.14518300 |
| N | -5.81939600 | -0.00906400 | 0.07553400  |
| N | 2.79163200  | 4.92749700  | -0.29537000 |
| N | 0.61775200  | 6.18480500  | -0.69609900 |

|   |             |             |             |
|---|-------------|-------------|-------------|
| N | -5.81509100 | 2.48731900  | -0.14424500 |
| B | 5.72256100  | -2.52543700 | -0.61023100 |
| B | -0.78692900 | -6.19838000 | -0.75503300 |
| B | -0.80647600 | 6.19600700  | -0.75467200 |
| B | -5.15729800 | 3.72774600  | -0.34202700 |
| N | 0.63723100  | -6.18281900 | -0.69593900 |
| N | 2.80711900  | -4.91892400 | -0.29437900 |
| N | 4.93451100  | -3.68495000 | -0.42829500 |
| H | -1.39007200 | 7.18669100  | -1.05814900 |
| H | -3.56554200 | 5.95847800  | -0.78896800 |
| H | -5.76932600 | 4.72661100  | -0.54942200 |
| H | 6.81218800  | 0.01042600  | -1.04850200 |
| H | 6.82020600  | 2.59122500  | -1.04387400 |
| H | 6.82864500  | -2.57045100 | -1.04236600 |
| H | -1.36738800 | -7.19084500 | -1.05871000 |
| H | -3.54667800 | -5.96932000 | -0.79025100 |
| H | -5.75432100 | -4.74435000 | -0.55107800 |
| H | 5.33974900  | 4.58188200  | -0.69807100 |
| H | 3.32980900  | 5.73699600  | -0.57646000 |
| H | 1.09814900  | 7.04270400  | -0.93209100 |
| H | -6.82475700 | 2.48393400  | -0.19947400 |
| H | -6.82660400 | -0.01063600 | -0.01410100 |
| H | -6.81684600 | -2.50511100 | -0.20057100 |
| H | 1.12034400  | -7.03925200 | -0.93171100 |
| H | 3.34785300  | -5.72681300 | -0.57519700 |
| H | 5.35434400  | -4.56562000 | -0.69613400 |

K<sup>+</sup>@V<sub>B</sub> *h*-BN (reactant)

|   |             |             |             |
|---|-------------|-------------|-------------|
| K | 1.46617100  | -0.34745900 | 2.71310800  |
| B | -1.11344900 | -1.04051900 | 0.16019900  |
| B | -0.47547400 | 1.40261800  | 0.12588600  |
| B | 0.72769700  | -2.79002000 | 0.06456000  |
| B | -1.70001100 | -3.47054000 | -0.07754600 |
| B | -3.51336300 | -1.71956300 | -0.06868700 |
| B | -2.88553700 | 0.71438800  | -0.02422300 |
| B | -2.27151100 | 3.14898600  | -0.04103500 |
| B | 0.15264400  | 3.83874400  | -0.07772200 |
| B | 1.98528800  | 2.10421100  | 0.00474800  |
| B | 3.82474600  | 0.36836500  | -0.04391400 |
| B | 3.17938200  | -2.09132900 | -0.01981900 |
| N | 2.98574300  | -0.71868500 | 0.37745300  |
| N | 0.20624400  | -1.51127600 | 0.49805100  |
| N | 2.13806400  | -3.09117300 | -0.08543700 |
| N | 3.37439300  | 1.73339600  | -0.14750200 |
| N | 0.93105300  | 1.19509300  | 0.40589500  |
| N | 1.56324500  | 3.48526700  | -0.11016900 |
| N | -0.85714400 | 2.79643300  | 0.01974900  |
| N | -1.46760200 | 0.35631800  | 0.07778300  |
| N | -3.26906900 | 2.10582100  | -0.04989000 |
| N | -3.88790300 | -0.32532900 | -0.06578900 |
| N | -2.10720200 | -2.07941900 | 0.02104500  |
| N | -0.28605600 | -3.81485700 | -0.08529900 |
| B | 2.52762500  | -4.48824000 | -0.32173200 |
| B | 0.11313400  | -5.20436100 | -0.27761900 |
| B | -5.30206000 | 0.03083600  | -0.13467300 |

|   |             |             |             |
|---|-------------|-------------|-------------|
| B | -4.68353000 | 2.46579200  | -0.10947600 |
| B | 2.56553700  | 4.53046600  | -0.30473200 |
| B | 4.37169100  | 2.78138700  | -0.38328100 |
| N | 5.21755200  | 0.00000000  | -0.26395600 |
| N | 4.58335000  | -2.42980600 | -0.24549000 |
| N | -2.70535600 | -4.50182400 | -0.20306500 |
| N | -4.50964200 | -2.76637000 | -0.16260000 |
| N | -2.65487800 | 4.54469000  | -0.10166800 |
| N | -0.25039200 | 5.22426100  | -0.17109300 |
| B | 5.58632000  | -1.39385200 | -0.35000200 |
| B | -4.10842700 | -4.14870100 | -0.22243400 |
| B | -1.65231800 | 5.57572000  | -0.15848900 |
| B | 6.19776500  | 1.04812500  | -0.49384900 |
| B | -5.91641500 | -2.40858000 | -0.21787800 |
| N | 5.74783500  | 2.39336700  | -0.52816400 |
| N | -6.26689800 | -1.03194300 | -0.19254100 |
| N | -5.65590100 | 1.41696900  | -0.14142100 |
| N | 3.93814200  | 4.14087900  | -0.42884300 |
| N | 2.12044100  | 5.89040400  | -0.37136500 |
| N | -5.02735300 | 3.85986700  | -0.13350300 |
| B | 4.95317200  | -3.82094200 | -0.44621100 |
| B | -2.30439400 | -5.88988800 | -0.33468800 |
| B | 0.74999400  | 6.26625900  | -0.30372100 |
| B | -4.06272100 | 4.90167200  | -0.13871500 |
| N | -0.91487500 | -6.19824900 | -0.37024500 |
| N | 1.51292000  | -5.49209100 | -0.37298900 |
| N | 3.92351200  | -4.79521800 | -0.46289000 |
| H | 0.43189400  | 7.41147900  | -0.36186700 |

|   |             |             |             |
|---|-------------|-------------|-------------|
| H | -1.97459700 | 6.71971100  | -0.20386800 |
| H | -4.39748200 | 6.04351500  | -0.17502400 |
| H | 6.72045000  | -1.69116800 | -0.54676600 |
| H | 7.34534600  | 0.77696400  | -0.65383800 |
| H | 6.09299900  | -4.12611700 | -0.59931500 |
| H | -3.11866000 | -6.75373700 | -0.41811100 |
| H | -4.93061500 | -5.00516600 | -0.29593200 |
| H | -6.75500000 | -3.25105800 | -0.28336200 |
| H | 6.44299400  | 3.10940300  | -0.69164100 |
| H | 4.63070300  | 4.86198700  | -0.58214900 |
| H | 2.79958800  | 6.63048200  | -0.48696100 |
| H | -6.00136400 | 4.12890400  | -0.16683200 |
| H | -6.63468200 | 1.66663300  | -0.19126600 |
| H | -7.25091700 | -0.80378600 | -0.23642500 |
| H | -0.65897300 | -7.16971600 | -0.48501600 |
| H | 1.79763500  | -6.45106200 | -0.52339200 |
| H | 4.19891400  | -5.75638900 | -0.61444200 |

K@V<sub>N</sub> *h*-BN

|   |             |             |             |
|---|-------------|-------------|-------------|
| K | 0.23106700  | -1.16504500 | 0.46909700  |
| B | -1.76683700 | -0.28542000 | -0.20363000 |
| B | 1.90469300  | -1.02729100 | 2.06230500  |
| B | 0.75864600  | 1.23424700  | 0.50556200  |
| B | -1.59128900 | -2.34389700 | -0.24832600 |
| B | 1.15865500  | -3.44119000 | 0.45727300  |
| B | 3.33413700  | -2.22665100 | 0.49613100  |
| B | 3.10602700  | 0.35484200  | 0.48687000  |
| B | 2.68901700  | 2.71294900  | -0.13189600 |
| B | 0.37014000  | 3.67803100  | 0.00555600  |



|   |             |             |             |
|---|-------------|-------------|-------------|
| B | -1.69808800 | 2.20063600  | 0.14918900  |
| B | -3.91981500 | 0.97616200  | -0.14778000 |
| B | -3.81076200 | -1.50346000 | -0.46798200 |
| N | -3.16483100 | -0.21213200 | -0.38273000 |
| N | -2.95306700 | -2.66429200 | -0.45375100 |
| N | -3.17589100 | 2.18067400  | 0.09860800  |
| N | -0.89049800 | 0.94584400  | 0.16691000  |
| N | -1.06387700 | 3.51697400  | 0.17354200  |
| N | 1.24794700  | 2.53022900  | 0.08822600  |
| N | 1.79121300  | 0.32062400  | 1.08360900  |
| N | 3.59671000  | 1.59540700  | -0.05476600 |
| N | 3.91605500  | -0.87679200 | 0.41022600  |
| N | 2.01635200  | -2.38590800 | 1.05753200  |
| N | -0.50919300 | -3.40668400 | 0.07772900  |
| B | -3.49239600 | -3.99507200 | -0.37248400 |
| B | -1.08505200 | -4.76735300 | -0.04980000 |
| B | 5.28247100  | -0.75996000 | -0.08321500 |
| B | 4.99391600  | 1.72104300  | -0.41503000 |
| B | -1.87398400 | 4.72826800  | 0.27590800  |
| B | -3.96894800 | 3.38714800  | 0.28006800  |
| N | -5.37364500 | 0.87406400  | -0.15542900 |
| N | -5.24259400 | -1.62480100 | -0.46627200 |
| N | 1.86525900  | -4.64718700 | 0.05987300  |
| N | 4.04599200  | -3.38921500 | -0.00401400 |
| N | 3.21837900  | 4.01684300  | -0.49414300 |
| N | 0.94867200  | 4.99972900  | -0.21114000 |
| B | -6.02412300 | -0.40854200 | -0.33016000 |
| B | 3.31299700  | -4.62196000 | -0.10206200 |

|   |             |             |             |
|---|-------------|-------------|-------------|
| B | 2.35116800  | 5.15957400  | -0.49466500 |
| B | -6.13425600 | 2.08541200  | 0.06771800  |
| B | 5.44302800  | -3.26573800 | -0.35471000 |
| N | -5.41026200 | 3.28918900  | 0.27747000  |
| N | 6.03194000  | -1.96971600 | -0.32846900 |
| N | 5.81461900  | 0.54492100  | -0.36995200 |
| N | -3.29170100 | 4.62829400  | 0.43210500  |
| N | -1.24296700 | 6.01706900  | 0.19674100  |
| N | 5.46908700  | 3.02399700  | -0.80029700 |
| B | -5.80279600 | -2.96966900 | -0.48343800 |
| B | 1.18228500  | -5.90370400 | -0.12187000 |
| B | 0.13123100  | 6.18437300  | -0.09953500 |
| B | 4.62291100  | 4.16618300  | -0.82311400 |
| N | -0.23172000 | -5.92717500 | -0.04775900 |
| N | -2.51190300 | -5.01398000 | -0.20226700 |
| N | -4.93047700 | -4.10585800 | -0.44724500 |
| H | 0.59793300  | 7.27223600  | -0.24445800 |
| H | 2.78930700  | 6.24335500  | -0.72706400 |
| H | 5.06202300  | 5.23589500  | -1.11792100 |
| H | -7.21464700 | -0.46972400 | -0.33786400 |
| H | -7.32701500 | 2.07689600  | 0.07479500  |
| H | -6.98491700 | -3.12835400 | -0.50783400 |
| H | 1.79233500  | -6.90906200 | -0.31932500 |
| H | 3.87864500  | -5.63409900 | -0.37781200 |
| H | 6.08543700  | -4.21970600 | -0.67471900 |
| H | -5.94725400 | 4.13355800  | 0.42072900  |
| H | -3.82975600 | 5.47894100  | 0.52312400  |
| H | -1.81559800 | 6.84605100  | 0.27226200  |

|   |             |             |             |
|---|-------------|-------------|-------------|
| H | 6.44165500  | 3.15503200  | -1.04112000 |
| H | 6.77568600  | 0.61467300  | -0.67639100 |
| H | 6.99624900  | -1.89546000 | -0.62225600 |
| H | -0.67164700 | -6.83082500 | -0.15772700 |
| H | -2.79984500 | -5.98377000 | -0.19349700 |
| H | -5.37095000 | -5.01539400 | -0.42055100 |

K@V<sub>N</sub> *h*-BN (reactant)

|   |             |             |             |
|---|-------------|-------------|-------------|
| K | 2.33003800  | -1.05254100 | -2.21217600 |
| B | 1.11870200  | 0.07271000  | 0.13843300  |
| B | -0.21321100 | 1.24082300  | 0.53639200  |
| B | -1.19820600 | -0.80644400 | -0.19937500 |
| B | 2.03327000  | 1.52599800  | -0.55981300 |
| B | 0.54972600  | 3.54852100  | -0.14409700 |
| B | -1.77006300 | 3.24972500  | 0.66213300  |
| B | -2.76423600 | 1.01374600  | 0.38772800  |
| B | -3.65659100 | -1.23123100 | -0.24578700 |
| B | -2.02283100 | -3.09856100 | -0.55415000 |
| B | 0.40703300  | -2.54544900 | -0.11346800 |
| B | 2.62292400  | -2.04221800 | 0.92401800  |
| B | 3.60712500  | 0.09774100  | 0.54661200  |
| N | 2.39679000  | -0.63580300 | 0.75151900  |
| N | 3.44758600  | 1.25946500  | -0.27318300 |
| N | 1.66953100  | -3.02838100 | 0.42938200  |
| N | 0.19064400  | -1.14157300 | -0.35112900 |
| N | -0.65068700 | -3.53114100 | -0.38832300 |
| N | -2.30720400 | -1.70293800 | -0.42544500 |
| N | -1.43786200 | 0.50243600  | 0.29189000  |
| N | -3.89309400 | 0.14124400  | 0.13599000  |

|   |             |             |             |
|---|-------------|-------------|-------------|
| N | -2.94278400 | 2.40073900  | 0.71423700  |
| N | -0.42574200 | 2.69778400  | 0.49393300  |
| N | 1.75377400  | 2.96472000  | -0.70321400 |
| B | 4.53684400  | 2.17510300  | -0.47920600 |
| B | 2.84070400  | 3.87923400  | -1.04528600 |
| B | -4.28371600 | 2.92988500  | 0.83906000  |
| B | -5.23561200 | 0.64691200  | 0.30622500  |
| B | -0.38797300 | -4.95000900 | -0.29079100 |
| B | 1.90166400  | -4.44930500 | 0.60585800  |
| N | 3.91549500  | -2.52637300 | 1.44999300  |
| N | 4.93055800  | -0.31514000 | 0.99652200  |
| N | 0.31594100  | 4.99417500  | -0.22313400 |
| N | -1.97596500 | 4.69393100  | 0.70016400  |
| N | -4.76590400 | -2.15640200 | -0.43746700 |
| N | -3.12146500 | -4.03722700 | -0.74188900 |
| B | 5.04490900  | -1.63259900 | 1.56047900  |
| B | -0.90829400 | 5.56095300  | 0.27954600  |
| B | -4.48467400 | -3.54737300 | -0.71414000 |
| B | 4.12031300  | -3.93887700 | 1.67273100  |
| B | -3.29391800 | 5.22963300  | 0.96969900  |
| N | 3.12094700  | -4.86189200 | 1.25202300  |
| N | -4.40894900 | 4.34611500  | 1.07264400  |
| N | -5.39971100 | 2.02704700  | 0.68613900  |
| N | 0.91582600  | -5.38150200 | 0.13204500  |
| N | -1.46549000 | -5.86413500 | -0.59476000 |
| N | -6.31835800 | -0.28208700 | 0.07328700  |
| B | 6.05226000  | 0.55754200  | 0.73158200  |
| B | 1.31072900  | 5.85424700  | -0.81402800 |

|   |             |             |             |
|---|-------------|-------------|-------------|
| B | -2.81414800 | -5.44859100 | -0.80330900 |
| B | -6.11584600 | -1.64999700 | -0.28345300 |
| N | 2.53426400  | 5.27412400  | -1.24454100 |
| N | 4.20875800  | 3.41729100  | -1.11025600 |
| N | 5.84137300  | 1.76374600  | -0.00947200 |
| H | -3.66978700 | -6.25891200 | -0.99832800 |
| H | -5.38612700 | -4.30996600 | -0.89053800 |
| H | -7.05619800 | -2.36846600 | -0.44791600 |
| H | 6.07307100  | -2.00901300 | 2.03575800  |
| H | 5.12830000  | -4.33875500 | 2.17414900  |
| H | 7.14997600  | 0.27300900  | 1.10987900  |
| H | 1.12733800  | 7.02963500  | -0.92182600 |
| H | -1.05488600 | 6.74527200  | 0.29970800  |
| H | -3.45695300 | 6.40811500  | 1.07857400  |
| H | 3.29019100  | -5.84419000 | 1.41771900  |
| H | 1.08726300  | -6.37068000 | 0.25212600  |
| H | -1.28587400 | -6.85868900 | -0.58203100 |
| H | -7.27452400 | 0.02877300  | 0.17662300  |
| H | -6.33557900 | 2.39770800  | 0.78260700  |
| H | -5.31975200 | 4.75971900  | 1.21526300  |
| H | 3.26127600  | 5.89818400  | -1.56572300 |
| H | 4.93072700  | 4.10724900  | -1.26973700 |
| H | 6.63852400  | 2.37109600  | -0.14161400 |

K@V<sub>N</sub> *h*-BN (product)

|   |             |             |             |
|---|-------------|-------------|-------------|
| K | -1.92428300 | -0.69589100 | 2.66318200  |
| B | -1.16138600 | 0.13467000  | -0.11298700 |
| B | 0.11081500  | -1.16823100 | 0.41275600  |
| B | 1.22021500  | 0.82857500  | -0.30401100 |

|   |             |             |             |
|---|-------------|-------------|-------------|
| B | -2.06346100 | -1.27973300 | -0.83545800 |
| B | -0.72872500 | -3.40978100 | -0.40329400 |
| B | 1.55181200  | -3.27058200 | 0.52983800  |
| B | 2.66753500  | -1.08758700 | 0.29832400  |
| B | 3.69985900  | 1.10415100  | -0.31436400 |
| B | 2.18401000  | 3.05800700  | -0.69762300 |
| B | -0.29320100 | 2.66065500  | -0.35076000 |
| B | -2.59503800 | 2.33782700  | 0.52447600  |
| B | -3.66404000 | 0.25793200  | 0.07765300  |
| N | -2.43847100 | 0.89879400  | 0.46770300  |
| N | -3.47803000 | -0.96524700 | -0.62537700 |
| N | -1.53802400 | 3.23866500  | 0.13614300  |
| N | -0.13007500 | 1.24135000  | -0.47620100 |
| N | 0.83768800  | 3.57262400  | -0.59619000 |
| N | 2.38741600  | 1.65408700  | -0.50472600 |
| N | 1.37385900  | -0.50059500 | 0.18846500  |
| N | 3.84911400  | -0.28300400 | 0.07527000  |
| N | 2.76252700  | -2.48641700 | 0.62865800  |
| N | 0.23936200  | -2.64363200 | 0.34892000  |
| N | -1.85122100 | -2.73167600 | -1.01440800 |
| B | -4.59266900 | -1.77618600 | -1.02672500 |
| B | -2.95121200 | -3.56498500 | -1.50010100 |
| B | 4.07004100  | -3.09229600 | 0.76830800  |
| B | 5.15710400  | -0.86564000 | 0.26017500  |
| B | 0.65370900  | 5.00556600  | -0.56711300 |
| B | -1.70374400 | 4.67306400  | 0.22240600  |
| N | -3.90234200 | 2.90568500  | 0.92265800  |
| N | -5.00024200 | 0.75467400  | 0.37725500  |

|   |             |             |             |
|---|-------------|-------------|-------------|
| N | -0.57093700 | -4.86370400 | -0.51957600 |
| N | 1.67404600  | -4.72481200 | 0.54386400  |
| N | 4.86730400  | 1.95559300  | -0.50051700 |
| N | 3.34431600  | 3.92327800  | -0.88253600 |
| B | -5.09455300 | 2.09742600  | 0.89002900  |
| B | 0.58578700  | -5.51668700 | 0.03489600  |
| B | 4.67265700  | 3.35677500  | -0.81160700 |
| B | -4.03933600 | 4.33796500  | 1.08594300  |
| B | 2.95311100  | -5.33709300 | 0.84072600  |
| N | -2.94547800 | 5.18168700  | 0.75670300  |
| N | 4.10908900  | -4.51683600 | 0.99250200  |
| N | 5.23630900  | -2.25535100 | 0.64172500  |
| N | -0.63536800 | 5.52946800  | -0.20906900 |
| N | 1.79502300  | 5.84601800  | -0.85795600 |
| N | 6.29607700  | -0.00508000 | 0.04342800  |
| B | -6.13705000 | -0.03864200 | -0.03822900 |
| B | -1.55848700 | -5.63797600 | -1.23223600 |
| B | 3.12113100  | 5.34705400  | -1.00882400 |
| B | 6.18019100  | 1.37143100  | -0.32631400 |
| N | -2.70509500 | -4.96806300 | -1.73292400 |
| N | -4.27871600 | -3.02367400 | -1.65267400 |
| N | -5.91560600 | -1.27334000 | -0.72369800 |
| H | 4.02931400  | 6.09792400  | -1.20685200 |
| H | 5.62335700  | 4.05912700  | -0.98156000 |
| H | 7.16577900  | 2.02857200  | -0.48262400 |
| H | -6.14730600 | 2.54676900  | 1.23087200  |
| H | -5.06722700 | 4.80938000  | 1.47353500  |
| H | -7.25181200 | 0.33125300  | 0.18506100  |

|   |             |             |             |
|---|-------------|-------------|-------------|
| H | -1.43128600 | -6.81675500 | -1.37724200 |
| H | 0.66292200  | -6.70780000 | 0.02796700  |
| H | 3.04754200  | -6.52450400 | 0.93335100  |
| H | -3.07373400 | 6.17892900  | 0.85651500  |
| H | -0.76263600 | 6.53115200  | -0.16223500 |
| H | 1.67032800  | 6.84810600  | -0.89910700 |
| H | 7.23054400  | -0.37300500 | 0.15669500  |
| H | 6.14843000  | -2.68055800 | 0.74087200  |
| H | 4.99328000  | -4.98180700 | 1.14472100  |
| H | -3.43064500 | -5.53051200 | -2.15543000 |
| H | -5.01784900 | -3.64267500 | -1.95671100 |
| H | -6.73067500 | -1.80348500 | -0.99982400 |

$K^+@V_N$  *h*-BN

|   |             |             |             |
|---|-------------|-------------|-------------|
| K | 0.20682500  | -1.16356700 | 0.44857200  |
| B | 2.06940300  | -1.00875000 | 1.74616700  |
| B | -1.78378600 | -0.29234800 | -0.21853500 |
| B | 0.69649300  | 1.25108100  | 0.48397600  |
| B | -1.59803700 | -2.35594900 | -0.25632400 |
| B | -3.81411900 | -1.52497800 | -0.46688500 |
| B | -3.93484100 | 0.96282000  | -0.14950300 |
| B | -1.72139600 | 2.20981100  | 0.14394600  |
| B | 0.34090100  | 3.68933000  | 0.01708800  |
| B | 2.67341500  | 2.73127500  | -0.11709400 |
| B | 3.13622300  | 0.38570400  | 0.45560000  |
| B | 3.37985100  | -2.22180500 | 0.47460700  |
| B | 1.11947700  | -3.45190000 | 0.45162700  |
| N | 2.04025200  | -2.35365100 | 1.05356400  |
| N | -0.47911700 | -3.41776600 | 0.09066100  |



|   |             |             |             |
|---|-------------|-------------|-------------|
| N | 3.92881400  | -0.85978900 | 0.39078700  |
| N | 1.80671100  | 0.31215000  | 1.06889200  |
| N | 3.59767500  | 1.61734700  | -0.06335200 |
| N | 1.22599400  | 2.52548000  | 0.10698700  |
| N | -0.88781300 | 0.94892300  | 0.16674700  |
| N | -1.08773600 | 3.51798800  | 0.17307700  |
| N | -3.18907100 | 2.16779700  | 0.09451400  |
| N | -3.16876000 | -0.22663500 | -0.38611700 |
| N | -2.94312700 | -2.68563100 | -0.44779300 |
| B | -1.06420400 | -4.79141200 | -0.04294500 |
| B | -3.47998400 | -4.02390700 | -0.36066000 |
| B | -3.99575800 | 3.37599800  | 0.27093900  |
| B | -1.90898900 | 4.73352800  | 0.27092600  |
| B | 5.00350700  | 1.75410600  | -0.42350300 |
| B | 5.32014800  | -0.73425300 | -0.09092200 |
| N | 4.07276100  | -3.37961700 | 0.00719200  |
| N | 1.87467500  | -4.62524400 | 0.10239500  |
| N | -5.23480000 | -1.65436000 | -0.45499700 |
| N | -5.37915700 | 0.84734700  | -0.15214400 |
| N | 0.92177700  | 5.00256400  | -0.17915200 |
| N | 3.19401400  | 4.02909800  | -0.46198400 |
| B | 3.32905400  | -4.61232700 | -0.05791300 |
| B | -6.02718900 | -0.43833000 | -0.32218500 |
| B | 2.32289700  | 5.17601900  | -0.45298300 |
| B | 5.47984800  | -3.25130400 | -0.34255100 |
| B | -6.15191300 | 2.05761900  | 0.06781100  |
| N | 6.05633700  | -1.94900800 | -0.32035200 |
| N | -5.43122700 | 3.26444300  | 0.27066900  |

|   |             |             |             |
|---|-------------|-------------|-------------|
| N | -3.32261300 | 4.61899700  | 0.41691400  |
| N | 5.82473600  | 0.57329200  | -0.37648800 |
| N | 5.45846500  | 3.05744100  | -0.79339500 |
| N | -1.27730000 | 6.01836000  | 0.20149500  |
| B | 1.20929700  | -5.90596700 | -0.08663400 |
| B | -5.79175500 | -3.00453200 | -0.46681100 |
| B | 4.59947400  | 4.19496600  | -0.79719500 |
| B | 0.09833800  | 6.19263800  | -0.07312500 |
| N | -4.90983900 | -4.13750000 | -0.42753200 |
| N | -2.48348900 | -5.03207900 | -0.19142500 |
| N | -0.19995100 | -5.93934300 | -0.03774900 |
| H | 5.02528400  | 5.26912800  | -1.07915300 |
| H | 2.76152800  | 6.25900800  | -0.66935800 |
| H | 0.57080800  | 7.27611800  | -0.20513700 |
| H | 3.88735100  | -5.62990700 | -0.30651700 |
| H | 6.12054900  | -4.20455500 | -0.64971900 |
| H | 1.84335100  | -6.89562000 | -0.25837800 |
| H | -6.96990100 | -3.16787400 | -0.48690200 |
| H | -7.21418600 | -0.50787600 | -0.32670200 |
| H | -7.34148700 | 2.03804100  | 0.07720000  |
| H | 7.02400400  | -1.88018400 | -0.60798300 |
| H | 6.78755800  | 0.65460300  | -0.67746300 |
| H | 6.42782800  | 3.20812200  | -1.03818200 |
| H | -1.85021200 | 6.84809900  | 0.27440400  |
| H | -3.86758800 | 5.46582900  | 0.50766400  |
| H | -5.97587400 | 4.10531300  | 0.40941100  |
| H | -5.35043300 | -5.04756900 | -0.39896000 |
| H | -2.76836700 | -6.00348100 | -0.18681700 |

|                                                        |             |             |             |
|--------------------------------------------------------|-------------|-------------|-------------|
| H                                                      | -0.62912900 | -6.84928500 | -0.14479600 |
| K <sup>+</sup> @V <sub>N</sub> <i>h</i> -BN (reactant) |             |             |             |
| K                                                      | 0.23489200  | -0.99809500 | -2.53289500 |
| B                                                      | 0.81339300  | -1.12794600 | 0.64806700  |
| B                                                      | -1.44027000 | -0.36797700 | 0.08287900  |
| B                                                      | 0.51035900  | 1.28297800  | 0.12013500  |
| B                                                      | -1.17190100 | -2.29753200 | -0.03632700 |
| B                                                      | -3.40042900 | -1.66203400 | 0.70170200  |
| B                                                      | -3.70050400 | 0.77338200  | 0.48824300  |
| B                                                      | -1.76744600 | 2.16393900  | -0.20037200 |
| B                                                      | 0.21339300  | 3.71124000  | -0.35314300 |
| B                                                      | 2.49501800  | 2.81839100  | 0.19803000  |
| B                                                      | 2.80378500  | 0.37500600  | 0.61487600  |
| B                                                      | 3.11602700  | -2.08368300 | 0.50418100  |
| B                                                      | 1.12051900  | -3.43042300 | -0.19893000 |
| N                                                      | 1.66475800  | -2.23825300 | 0.39206400  |
| N                                                      | -0.29757700 | -3.40746400 | -0.49442400 |
| N                                                      | 3.66140600  | -0.77516600 | 0.72691600  |
| N                                                      | 1.35118700  | 0.18080400  | 0.51867700  |
| N                                                      | 3.35081000  | 1.69660700  | 0.52295500  |
| N                                                      | 1.07804000  | 2.59174000  | -0.03289000 |
| N                                                      | -0.87615000 | 0.97551800  | -0.16331900 |
| N                                                      | -1.20949500 | 3.47978500  | -0.43510300 |
| N                                                      | -3.17905500 | 2.03621200  | 0.04320600  |
| N                                                      | -2.81513100 | -0.36700600 | 0.52552300  |
| N                                                      | -2.48869200 | -2.72359300 | 0.39244700  |
| B                                                      | -0.86971200 | -4.75118500 | -0.74303600 |
| B                                                      | -3.04568000 | -4.05223600 | 0.23233900  |

|   |             |             |             |
|---|-------------|-------------|-------------|
| B | -4.06778500 | 3.18883200  | -0.04616200 |
| B | -2.09673900 | 4.62980400  | -0.60139500 |
| B | 4.78630600  | 1.89394800  | 0.70052900  |
| B | 5.10558700  | -0.59833200 | 0.84776200  |
| N | 3.96830400  | -3.23277700 | 0.31286900  |
| N | 1.99705300  | -4.53637800 | -0.51218000 |
| N | -4.77898100 | -1.86272900 | 1.04733000  |
| N | -5.10059700 | 0.60517800  | 0.83622000  |
| N | 0.78155800  | 5.03043900  | -0.53065100 |
| N | 3.04792200  | 4.14712700  | 0.06016600  |
| B | 3.40789500  | -4.46300700 | -0.19009300 |
| B | -5.63296000 | -0.70037100 | 1.15836800  |
| B | 2.19277400  | 5.24836300  | -0.32120600 |
| B | 5.39940800  | -3.08264600 | 0.54139300  |
| B | -5.98227700 | 1.75641100  | 0.75322700  |
| N | 5.91312200  | -1.78903700 | 0.84002300  |
| N | -5.44797600 | 2.99667800  | 0.30154000  |
| N | -3.50874200 | 4.43855400  | -0.46138300 |
| N | 5.61388000  | 0.73799100  | 0.91524600  |
| N | 5.28483200  | 3.23630200  | 0.61618500  |
| N | -1.49925900 | 5.90904200  | -0.87185700 |
| B | 1.42477800  | -5.73752800 | -1.08993100 |
| B | -5.27346000 | -3.22623700 | 1.09438900  |
| B | 4.46565200  | 4.35731400  | 0.29418800  |
| B | -0.09846900 | 6.14627700  | -0.82959300 |
| N | -4.39281500 | -4.27408600 | 0.68371800  |
| N | -2.23350900 | -5.02272100 | -0.43469800 |
| N | 0.01289900  | -5.78156200 | -1.23251000 |

|   |             |             |             |
|---|-------------|-------------|-------------|
| H | 4.93903500  | 5.44614200  | 0.20863000  |
| H | 2.65293500  | 6.33700000  | -0.45710600 |
| H | 0.34224400  | 7.23604600  | -1.01820200 |
| H | 4.10554800  | -5.40826700 | -0.37495200 |
| H | 6.12455800  | -4.02282400 | 0.45923800  |
| H | 2.10949700  | -6.65562200 | -1.41252800 |
| H | -6.39197900 | -3.46515200 | 1.42409700  |
| H | -6.77537200 | -0.82464000 | 1.46633400  |
| H | -7.13311000 | 1.66262900  | 1.04381200  |
| H | 6.91364600  | -1.71146000 | 0.96570300  |
| H | 6.61172800  | 0.87367800  | 1.01169000  |
| H | 6.27008000  | 3.41290600  | 0.75944200  |
| H | -2.09796800 | 6.70734400  | -1.03522000 |
| H | -4.11637600 | 5.24317700  | -0.54057900 |
| H | -6.08324600 | 3.78198800  | 0.25594900  |
| H | -4.77669600 | -5.20922900 | 0.65485100  |
| H | -2.58711900 | -5.95956900 | -0.57696200 |
| H | -0.39122600 | -6.66251800 | -1.52229200 |

$K^+@V_N$  *h*-BN (product)

|   |             |             |             |
|---|-------------|-------------|-------------|
| K | -1.87898100 | -1.28518200 | 2.74261500  |
| B | 0.67787000  | -1.29418600 | 0.43268900  |
| B | -1.38100000 | -0.00839000 | -0.18885800 |
| B | 0.91763000  | 1.12442400  | -0.03883400 |
| B | -1.58774800 | -1.92823400 | -0.42725100 |
| B | -3.66992200 | -0.79729500 | 0.18312700  |
| B | -3.34213800 | 1.64026800  | 0.19093600  |
| B | -1.08788400 | 2.53520900  | -0.32702800 |
| B | 1.20609200  | 3.56356600  | -0.46806000 |

|   |             |             |             |
|---|-------------|-------------|-------------|
| B | 3.21328900  | 2.14499300  | 0.02293900  |
| B | 2.94062000  | -0.30246400 | 0.41231300  |
| B | 2.65925500  | -2.76289400 | 0.23977500  |
| B | 0.40555800  | -3.55722100 | -0.51934900 |
| N | 1.20751100  | -2.57768900 | 0.16667900  |
| N | -0.97774600 | -3.21343100 | -0.78803100 |
| N | 3.49916200  | -1.62719900 | 0.49719300  |
| N | 1.48373400  | -0.13829200 | 0.36781800  |
| N | 3.78543600  | 0.85170500  | 0.32787600  |
| N | 1.77723100  | 2.26789100  | -0.16908100 |
| N | -0.51464600 | 1.17205000  | -0.26853000 |
| N | -0.23397400 | 3.68608400  | -0.52381900 |
| N | -2.50539900 | 2.75108100  | -0.13297600 |
| N | -2.75904900 | 0.30893600  | 0.22012100  |
| N | -3.01399200 | -2.04235700 | -0.08403500 |
| B | -1.82300700 | -4.35374500 | -1.19294600 |
| B | -3.86247700 | -3.18666800 | -0.39176100 |
| B | -3.08796800 | 4.08571300  | -0.22496700 |
| B | -0.81422600 | 5.01498500  | -0.69696800 |
| B | 5.22937800  | 0.69715200  | 0.46151400  |
| B | 4.94648200  | -1.79924200 | 0.57583400  |
| N | 3.21883300  | -4.07173100 | 0.00206400  |
| N | 1.00120100  | -4.82680500 | -0.87480000 |
| N | -5.07990000 | -0.67348100 | 0.43138900  |
| N | -4.76689100 | 1.79989800  | 0.44569800  |
| N | 2.06979200  | 4.71263600  | -0.64385500 |
| N | 4.06765200  | 3.30456600  | -0.11846000 |
| B | 2.38674100  | -5.10497800 | -0.56003500 |

|   |             |             |             |
|---|-------------|-------------|-------------|
| B | -5.63163000 | 0.65741600  | 0.59307900  |
| B | 3.49669400  | 4.58166000  | -0.47315100 |
| B | 4.64639800  | -4.27059600 | 0.20291800  |
| B | -5.33924400 | 3.13842700  | 0.39507400  |
| N | 5.45333100  | -3.14518500 | 0.53113900  |
| N | -4.49246200 | 4.22566500  | 0.05855000  |
| N | -2.23448800 | 5.17174500  | -0.57522300 |
| N | 5.76089400  | -0.62460400 | 0.65164600  |
| N | 6.03535700  | 1.88043500  | 0.36914000  |
| N | 0.06803900  | 6.11763600  | -0.95357600 |
| B | 0.18930300  | -5.83016700 | -1.52922100 |
| B | -5.90058500 | -1.86838600 | 0.32142200  |
| B | 5.50021300  | 3.16642200  | 0.07084200  |
| B | 1.48557800  | 6.00889100  | -0.92643000 |
| N | -5.26434600 | -3.08245500 | -0.07010200 |
| N | -3.24495200 | -4.29707700 | -1.02316100 |
| N | -1.19344900 | -5.54729300 | -1.68378000 |
| H | 6.21836200  | 4.11114800  | -0.02693400 |
| H | 4.20160300  | 5.52985000  | -0.61413800 |
| H | 2.17346000  | 6.96260500  | -1.11276700 |
| H | 2.84012000  | -6.18045800 | -0.78985900 |
| H | 5.12857700  | -5.35206800 | 0.07913400  |
| H | 0.65257600  | -6.86364600 | -1.89361200 |
| H | -7.07085800 | -1.82954200 | 0.53505100  |
| H | -6.79170700 | 0.79665500  | 0.81706200  |
| H | -6.49584800 | 3.30882300  | 0.62070200  |
| H | 6.44737700  | -3.30475800 | 0.62610600  |
| H | 6.76492500  | -0.73407900 | 0.70809000  |

|   |             |             |             |
|---|-------------|-------------|-------------|
| H | 7.03844100  | 1.81146800  | 0.47516300  |
| H | -0.32344500 | 7.03500900  | -1.11879400 |
| H | -2.62892800 | 6.09839900  | -0.66640100 |
| H | -4.91333400 | 5.14410600  | 0.01572600  |
| H | -5.86120100 | -3.88600600 | -0.21641900 |
| H | -3.79759800 | -5.10033400 | -1.29136000 |
| H | -1.77642300 | -6.28110200 | -2.06364900 |

K@V<sub>BN</sub> *h*-BN

|   |             |             |             |
|---|-------------|-------------|-------------|
| K | 1.28622000  | -0.06862800 | 0.25286800  |
| B | -0.39939400 | -1.62933100 | 1.15478500  |
| B | -1.42966500 | 0.80072200  | 0.80019400  |
| B | 3.03198200  | -1.64737200 | -0.37151700 |
| B | 3.86850200  | 0.93178000  | -0.63115000 |
| B | 2.50632900  | 2.87064700  | -0.27829000 |
| B | -0.11189600 | 2.81606100  | 0.40648800  |
| B | -2.62222500 | 2.87397800  | 0.15992500  |
| B | -3.88796300 | 0.71124800  | 0.11932800  |
| B | -2.64430500 | -1.45732000 | 0.33523300  |
| B | -1.31464400 | -3.61745700 | 0.14719900  |
| B | 1.19705700  | -3.54486200 | 0.23286200  |
| N | -0.06916500 | -2.88512300 | 0.47741100  |
| N | 2.53052000  | -2.85155500 | 0.00614300  |
| N | -2.56580000 | -2.91069300 | 0.11493500  |
| N | -1.46744600 | -0.76145000 | 0.83678300  |
| N | -3.87264200 | -0.75247900 | 0.09038100  |
| N | -2.68298200 | 1.43336100  | 0.37713000  |
| N | -0.25937200 | 1.52544900  | 0.96110100  |
| N | -1.36466800 | 3.57810300  | 0.15334800  |



|   |             |             |             |
|---|-------------|-------------|-------------|
| N | 1.20173900  | 3.49323600  | 0.07348900  |
| N | 2.67605100  | 1.55417700  | -0.79862700 |
| N | 3.92524300  | -0.68409100 | -0.57694300 |
| B | 3.84585400  | -3.61566900 | 0.05368800  |
| B | 5.19943100  | -1.41596100 | -0.30037700 |
| B | 1.17807300  | 4.94521000  | 0.07679000  |
| B | -1.34035100 | 5.00754600  | -0.00921700 |
| B | -5.08288000 | -1.48030300 | -0.22642200 |
| B | -3.78645900 | -3.63676700 | -0.21294300 |
| N | -1.24640100 | -5.04902200 | -0.09718800 |
| N | 1.24758000  | -4.98613000 | 0.12016300  |
| N | 5.15471500  | 1.54898700  | -0.32746300 |
| N | 3.77340200  | 3.65679000  | -0.08124900 |
| N | -3.87586500 | 3.59386000  | -0.09602100 |
| N | -5.12819400 | 1.42407800  | -0.16110400 |
| B | 0.00471000  | -5.73498100 | -0.02472100 |
| B | 5.04775800  | 3.00389300  | -0.13259800 |
| B | -5.10851300 | 2.87227200  | -0.22774100 |
| B | -2.47631400 | -5.78441000 | -0.36068400 |
| B | 3.70346000  | 5.08933700  | 0.09644700  |
| N | -3.69272100 | -5.06638200 | -0.41429800 |
| N | 2.42293900  | 5.69278100  | 0.09574600  |
| N | -0.07113200 | 5.66616500  | 0.05331100  |
| N | -5.01241000 | -2.91754600 | -0.32893200 |
| N | -6.29462800 | -0.73928500 | -0.43242600 |
| N | -2.59524400 | 5.70610200  | -0.19590400 |
| B | 2.49105300  | -5.72230600 | 0.15173500  |
| B | 6.37260100  | 0.82559700  | -0.19018000 |

|   |             |             |             |
|---|-------------|-------------|-------------|
| B | -6.34093600 | 0.68919400  | -0.41224800 |
| B | -3.84384700 | 5.03435200  | -0.25650100 |
| N | 6.37231600  | -0.63525300 | -0.22645200 |
| N | 5.06773200  | -2.85814300 | -0.07903000 |
| N | 3.73931600  | -5.02203200 | 0.19994600  |
| H | -7.37468700 | 1.25198200  | -0.61388300 |
| H | -6.13087800 | 3.45867900  | -0.41990400 |
| H | -4.85392600 | 5.64732800  | -0.44038300 |
| H | 0.05514400  | -6.92036800 | -0.11449900 |
| H | -2.44592400 | -6.96412500 | -0.53187700 |
| H | 2.49151200  | -6.91172100 | 0.14593100  |
| H | 7.41889000  | 1.37190800  | -0.01579600 |
| H | 6.05839600  | 3.62480900  | 0.01427300  |
| H | 4.69304300  | 5.75291400  | 0.21108500  |
| H | -4.53469600 | -5.58799200 | -0.61625400 |
| H | -5.85588100 | -3.42667500 | -0.55588800 |
| H | -7.15483600 | -1.23075400 | -0.63086000 |
| H | -2.59476700 | 6.71009000  | -0.31028800 |
| H | -0.03734600 | 6.67533300  | 0.00551500  |
| H | 2.37801800  | 6.69999900  | 0.16457500  |
| H | 7.26384500  | -1.08519700 | -0.06774300 |
| H | 5.92815200  | -3.38302700 | 0.02475800  |
| H | 4.58050800  | -5.58207400 | 0.23656200  |

K@V<sub>BN</sub> *h*-BN (reactant)

|   |             |             |             |
|---|-------------|-------------|-------------|
| K | 0.43291700  | -1.28236800 | -2.41377500 |
| B | -1.56070800 | -0.34587800 | 0.03245800  |
| B | 0.62857400  | 1.11434900  | -0.01645300 |
| B | -1.40090600 | -2.22070200 | 0.25043100  |

|   |             |             |             |
|---|-------------|-------------|-------------|
| B | 0.99797500  | -3.32428300 | 0.32086200  |
| B | 3.11454500  | -2.20577600 | -0.28767800 |
| B | 2.91718700  | 0.21675000  | -0.35298900 |
| B | 2.67363100  | 2.62708300  | 0.15865800  |
| B | 0.40434100  | 3.61316800  | 0.42547700  |
| B | -1.65935300 | 2.19661100  | 0.08262700  |
| B | -3.78428000 | 0.94142500  | -0.25315300 |
| B | -3.68001100 | -1.50612000 | -0.09387100 |
| N | -3.00240300 | -0.24869300 | -0.16181800 |
| N | -2.80764600 | -2.60443500 | 0.16579900  |
| N | -3.10583900 | 2.19226400  | -0.10975600 |
| N | -0.85668800 | 0.94554800  | 0.04002100  |
| N | -1.03697100 | 3.49311400  | 0.31173300  |
| N | 1.22666900  | 2.45130200  | 0.22238300  |
| N | 1.50810900  | 0.09029400  | -0.41053500 |
| N | 3.53559800  | 1.51950000  | -0.15076700 |
| N | 3.78152600  | -0.93977800 | -0.46267700 |
| N | 1.70036300  | -2.28576500 | -0.31477300 |
| N | -0.48175500 | -3.33830400 | 0.49107000  |
| B | -3.38501400 | -3.90073700 | 0.39202700  |
| B | -1.06511700 | -4.64294200 | 0.87869900  |
| B | 5.21404900  | -0.83038600 | -0.42022100 |
| B | 4.97791500  | 1.65330200  | -0.16813800 |
| B | -1.84344900 | 4.70216600  | 0.40957400  |
| B | -3.90515900 | 3.40363200  | -0.09867600 |
| N | -5.23182500 | 0.84469600  | -0.44238900 |
| N | -5.10913000 | -1.64216200 | -0.24707000 |
| N | 1.80728200  | -4.51302200 | 0.70877300  |

|   |             |             |             |
|---|-------------|-------------|-------------|
| N | 3.92483200  | -3.40149900 | -0.03217600 |
| N | 3.27861400  | 3.93348300  | 0.41419800  |
| N | 1.01334500  | 4.91393500  | 0.69871600  |
| B | -5.88497100 | -0.44241200 | -0.45248600 |
| B | 3.23622100  | -4.54755700 | 0.48498800  |
| B | 2.44506200  | 5.05963400  | 0.71162200  |
| B | -6.00311300 | 2.06567300  | -0.51557200 |
| B | 5.36501500  | -3.32165100 | -0.12126500 |
| N | -5.32261400 | 3.30165600  | -0.34931600 |
| N | 5.97772000  | -2.05763500 | -0.37226900 |
| N | 5.79245500  | 0.48720500  | -0.38075000 |
| N | -3.25459600 | 4.63915000  | 0.17437600  |
| N | -1.20940700 | 5.95172000  | 0.73182600  |
| N | 5.52994100  | 2.96708100  | 0.05782100  |
| B | -5.68071600 | -2.96696300 | -0.10214800 |
| B | 1.19279200  | -5.68860300 | 1.25510100  |
| B | 0.19389500  | 6.08514300  | 0.88455800  |
| B | 4.71651500  | 4.09224500  | 0.35790100  |
| N | -0.22103800 | -5.71307200 | 1.33359000  |
| N | -2.47664100 | -4.91002400 | 0.79718800  |
| N | -4.81286500 | -4.05295000 | 0.21326100  |
| H | 0.67893500  | 7.14489800  | 1.14246900  |
| H | 2.93143800  | 6.12279800  | 0.94975000  |
| H | 5.21583900  | 5.15826800  | 0.56209100  |
| H | -7.06583300 | -0.51335100 | -0.60781300 |
| H | -7.18283300 | 2.03964600  | -0.69679200 |
| H | -6.85442900 | -3.14450300 | -0.23088300 |
| H | 1.83554600  | -6.62985600 | 1.61187500  |

|   |             |             |             |
|---|-------------|-------------|-------------|
| H | 3.84749700  | -5.53779500 | 0.75579400  |
| H | 6.04208700  | -4.29576200 | 0.03168000  |
| H | -5.87501800 | 4.14752100  | -0.37387600 |
| H | -3.79616000 | 5.49104500  | 0.22029800  |
| H | -1.77966300 | 6.77895800  | 0.83728000  |
| H | 6.53137100  | 3.10061700  | 0.04244400  |
| H | 6.79791700  | 0.58420500  | -0.34072800 |
| H | 6.98756700  | -2.02231500 | -0.37782700 |
| H | -0.66083000 | -6.55764800 | 1.67143400  |
| H | -2.79907700 | -5.83990900 | 1.02644500  |
| H | -5.23362000 | -4.96294000 | 0.34120900  |

K@V<sub>BN</sub> *h*-BN (product)

|   |             |             |             |
|---|-------------|-------------|-------------|
| K | 0.43313600  | -1.28050000 | 2.41392200  |
| B | -1.56061800 | -0.34648900 | -0.03269700 |
| B | 0.62815700  | 1.11452100  | 0.01599300  |
| B | -1.40007700 | -2.22117800 | -0.25093200 |
| B | 0.99923600  | -3.32408400 | -0.31997000 |
| B | 3.11524300  | -2.20474800 | 0.28909700  |
| B | 2.91708500  | 0.21775900  | 0.35255400  |
| B | 2.67267700  | 2.62776000  | -0.16031900 |
| B | 0.40294600  | 3.61324600  | -0.42570200 |
| B | -1.66014500 | 2.19599700  | -0.08195100 |
| B | -3.78462500 | 0.93998200  | 0.25335600  |
| B | -3.67954700 | -1.50745100 | 0.09259600  |
| N | -3.00237800 | -0.24983300 | 0.16128700  |
| N | -2.80676000 | -2.60534400 | -0.16735900 |
| N | -3.10657600 | 2.19113400  | 0.11081200  |
| N | -0.85707400 | 0.94519100  | -0.03988900 |

|   |             |             |             |
|---|-------------|-------------|-------------|
| N | -1.03822900 | 3.49278200  | -0.31081600 |
| N | 1.22572900  | 2.45157500  | -0.22330900 |
| N | 1.50807700  | 0.09077100  | 0.40986800  |
| N | 3.53503700  | 1.52059300  | 0.14946900  |
| N | 3.78177100  | -0.93841000 | 0.46334700  |
| N | 1.70106200  | -2.28524500 | 0.31579400  |
| N | -0.48041300 | -3.33853300 | -0.49097500 |
| B | -3.38362400 | -3.90178400 | -0.39406300 |
| B | -1.06317900 | -4.64335200 | -0.87886600 |
| B | 5.21426000  | -0.82854400 | 0.42093100  |
| B | 4.97732200  | 1.65483700  | 0.16656200  |
| B | -1.84508400 | 4.70167600  | -0.40758500 |
| B | -3.90625100 | 3.40227800  | 0.10064300  |
| N | -5.23215000 | 0.84267100  | 0.44249200  |
| N | -5.10865600 | -1.64401600 | 0.24547900  |
| N | 1.80913000  | -4.51262000 | -0.70725200 |
| N | 3.92599100  | -3.40036800 | 0.03455600  |
| N | 3.27717200  | 3.93419100  | -0.41681300 |
| N | 1.01144500  | 4.91416300  | -0.69934600 |
| B | -5.88488100 | -0.44465000 | 0.45161400  |
| B | 3.23794900  | -4.54670400 | -0.48270700 |
| B | 2.44312000  | 5.06010400  | -0.71375600 |
| B | -6.00378400 | 2.06336700  | 0.51660700  |
| B | 5.36613600  | -3.31996100 | 0.12392200  |
| N | -5.32365800 | 3.29968200  | 0.35127100  |
| N | 5.97835800  | -2.05557900 | 0.37418400  |
| N | 5.79222400  | 0.48920600  | 0.38026600  |
| N | -3.25606900 | 4.63818100  | -0.17157700 |

|   |             |             |             |
|---|-------------|-------------|-------------|
| N | -1.21154400 | 5.95153100  | -0.72966800 |
| N | 5.52889300  | 2.96858100  | -0.06073300 |
| B | -5.67977600 | -2.96893900 | 0.09981100  |
| B | 1.19527100  | -5.68859000 | -1.25347600 |
| B | 0.19156000  | 6.08526800  | -0.88395300 |
| B | 4.71506800  | 4.09331500  | -0.36132000 |
| N | -0.21848500 | -5.71356400 | -1.33245700 |
| N | -2.47472800 | -4.91072900 | -0.79883700 |
| N | -4.81151000 | -4.05446900 | -0.21596800 |
| H | 0.67610700  | 7.14518900  | -1.14211100 |
| H | 2.92907600  | 6.12329300  | -0.95264600 |
| H | 5.21404000  | 5.15930300  | -0.56655300 |
| H | -7.06573400 | -0.51606300 | 0.60681400  |
| H | -7.18350600 | 2.03686600  | 0.69775800  |
| H | -6.85346800 | -3.14691200 | 0.22814200  |
| H | 1.83852100  | -6.62965900 | -1.60984600 |
| H | 3.84964400  | -5.53680400 | -0.75308100 |
| H | 6.04356700  | -4.29395800 | -0.02817500 |
| H | -5.87635100 | 4.14534200  | 0.37644700  |
| H | -3.79790200 | 5.48994000  | -0.21688600 |
| H | -1.78206900 | 6.77868800  | -0.83431300 |
| H | 6.53029200  | 3.10242200  | -0.04580200 |
| H | 6.79765500  | 0.58648800  | 0.34010300  |
| H | 6.98819500  | -2.01994100 | 0.37989600  |
| H | -0.65783200 | -6.55834000 | -1.67039300 |
| H | -2.79670500 | -5.84073400 | -1.02824300 |
| H | -5.23193400 | -4.96455100 | -0.34435800 |

$K^+@V_{BN} h\text{-BN}$

|   |             |             |             |
|---|-------------|-------------|-------------|
| K | 1.24114900  | -0.14003800 | 0.09589600  |
| B | -0.61448700 | -1.70776800 | 0.62262900  |
| B | -1.40517400 | 0.91440500  | 0.68710900  |
| B | 3.08831400  | -1.70639300 | -0.40781400 |
| B | 3.91176300  | 0.91109500  | -0.48713900 |
| B | 2.55920800  | 2.87232400  | -0.18013900 |
| B | -0.05997900 | 2.87039600  | 0.35842600  |
| B | -2.58916700 | 2.94707900  | 0.10706200  |
| B | -3.89209500 | 0.78009800  | 0.12751800  |
| B | -2.72304300 | -1.43948100 | 0.34317600  |
| B | -1.39034600 | -3.65983900 | 0.12038200  |
| B | 1.22965600  | -3.59760400 | 0.06969400  |
| N | -0.05933000 | -2.90165100 | 0.28167700  |
| N | 2.53513800  | -2.91582000 | -0.11340900 |
| N | -2.61282900 | -2.89864600 | 0.15368200  |
| N | -1.46036600 | -0.70370600 | 0.71587100  |
| N | -3.90592500 | -0.70360300 | 0.15723400  |
| N | -2.66784500 | 1.49352800  | 0.31633100  |
| N | -0.21212700 | 1.53953400  | 0.85822700  |
| N | -1.31607500 | 3.62309100  | 0.11477300  |
| N | 1.24972500  | 3.52524700  | 0.08203400  |
| N | 2.71712700  | 1.52966500  | -0.64320100 |
| N | 3.95257400  | -0.71807300 | -0.50282300 |
| B | 3.85555700  | -3.70061400 | -0.02918000 |
| B | 5.22638400  | -1.47741400 | -0.22108900 |
| B | 1.24277000  | 4.98313800  | 0.05991500  |
| B | -1.27828400 | 5.05991700  | -0.06832300 |



|   |             |             |             |
|---|-------------|-------------|-------------|
| B | -5.14780600 | -1.42967600 | -0.10053900 |
| B | -3.87894500 | -3.62641300 | -0.07749400 |
| N | -1.31770000 | -5.07271100 | -0.04743800 |
| N | 1.20693100  | -5.02400700 | 0.03301100  |
| N | 5.19184300  | 1.50641400  | -0.16748800 |
| N | 3.82464500  | 3.63619900  | 0.02698300  |
| N | -3.83523200 | 3.65941900  | -0.14467100 |
| N | -5.11775900 | 1.49296500  | -0.13709000 |
| B | -0.05568300 | -5.76380600 | -0.02864000 |
| B | 5.09561900  | 2.96947800  | 0.01922300  |
| B | -5.07826500 | 2.94954200  | -0.24448900 |
| B | -2.58560900 | -5.80198800 | -0.20642700 |
| B | 3.76872100  | 5.07899700  | 0.16726900  |
| N | -3.78920400 | -5.05885300 | -0.22099700 |
| N | 2.49682100  | 5.70172000  | 0.10850100  |
| N | -0.00384500 | 5.70375000  | -0.00971400 |
| N | -5.08287200 | -2.87533300 | -0.15527700 |
| N | -6.33441700 | -0.66695100 | -0.29310800 |
| N | -2.52863300 | 5.75659900  | -0.27085300 |
| B | 2.45261700  | -5.78976900 | 0.05127200  |
| B | 6.40040800  | 0.76700800  | -0.01675500 |
| B | -6.35273800 | 0.76943000  | -0.32452600 |
| B | -3.78732100 | 5.10531600  | -0.32280900 |
| N | 6.38518100  | -0.70046600 | -0.07710900 |
| N | 5.07181800  | -2.93579200 | -0.08152200 |
| N | 3.70653700  | -5.10652100 | 0.07849400  |
| H | -7.37900700 | 1.34026700  | -0.51566000 |
| H | -6.09585200 | 3.53641200  | -0.43703100 |

|   |             |             |             |
|---|-------------|-------------|-------------|
| H | -4.78989800 | 5.72212100  | -0.51137900 |
| H | -0.02368500 | -6.94713000 | -0.08459400 |
| H | -2.57478200 | -6.98313900 | -0.32653300 |
| H | 2.42140400  | -6.97465600 | 0.06060000  |
| H | 7.44673000  | 1.29488000  | 0.18764000  |
| H | 6.10703000  | 3.57661200  | 0.18923200  |
| H | 4.76268300  | 5.72648500  | 0.29866100  |
| H | -4.64366100 | -5.58512700 | -0.35302500 |
| H | -5.94651300 | -3.37631600 | -0.32167300 |
| H | -7.21587900 | -1.13654200 | -0.45110500 |
| H | -2.52107400 | 6.75968200  | -0.39754800 |
| H | 0.03581700  | 6.71252600  | -0.06888400 |
| H | 2.47362500  | 6.71144200  | 0.15352300  |
| H | 7.27591400  | -1.15307300 | 0.08468000  |
| H | 5.93041200  | -3.46615400 | 0.02196500  |
| H | 4.53527700  | -5.68682800 | 0.12272800  |

$K^+@V_{BN}$  *h*-BN (reactant)

|   |             |             |             |
|---|-------------|-------------|-------------|
| K | 0.75988700  | -1.98808300 | -2.31335700 |
| B | -1.63477300 | -0.21759400 | -0.08818700 |
| B | 0.66723500  | 0.86704800  | 0.07815600  |
| B | -1.61528100 | -1.97406900 | -0.18407400 |
| B | 0.57697900  | -2.86517500 | 0.81006200  |
| B | 2.90954900  | -2.15585400 | 0.56988300  |
| B | 2.90891600  | -0.13452700 | -0.41273800 |
| B | 2.77358000  | 2.28048600  | -0.50397400 |
| B | 0.71221400  | 3.40955700  | 0.28277600  |
| B | -1.46954600 | 2.22316000  | 0.40780000  |
| B | -3.71914700 | 1.25194500  | -0.04387800 |

|   |             |             |             |
|---|-------------|-------------|-------------|
| B | -3.76661400 | -1.13523800 | -0.64910300 |
| N | -3.02455900 | 0.04611900  | -0.34181600 |
| N | -2.93292400 | -2.30630800 | -0.66270900 |
| N | -2.91412800 | 2.35048500  | 0.39273000  |
| N | -0.78154700 | 0.91224100  | 0.20504800  |
| N | -0.69217800 | 3.41837300  | 0.60179300  |
| N | 1.38432000  | 2.14777500  | -0.06593000 |
| N | 1.49644100  | -0.37736200 | -0.09256800 |
| N | 3.52609500  | 1.08576800  | -0.76913400 |
| N | 3.70685900  | -1.27862200 | -0.19077800 |
| N | 1.49943800  | -1.74815100 | 0.54283700  |
| N | -0.76398600 | -3.05906200 | 0.25267100  |
| B | -3.55873200 | -3.59900200 | -0.66732800 |
| B | -1.43166600 | -4.39315700 | 0.36805900  |
| B | 5.14794700  | -1.27609000 | -0.17414300 |
| B | 4.98365900  | 1.10653800  | -0.93927400 |
| B | -1.35730200 | 4.67364700  | 0.96269900  |
| B | -3.59219300 | 3.59250100  | 0.72860600  |
| N | -5.16658700 | 1.28385500  | -0.16577400 |
| N | -5.18870800 | -1.15619700 | -0.79614100 |
| N | 1.17210300  | -3.97224100 | 1.58172000  |
| N | 3.50359700  | -3.25934100 | 1.25004700  |
| N | 3.44961300  | 3.55027600  | -0.63856500 |
| N | 1.44738100  | 4.66496200  | 0.28969300  |
| B | -5.89880100 | 0.09545200  | -0.56094500 |
| B | 2.57892500  | -4.13245800 | 1.90273500  |
| B | 2.79124100  | 4.75255000  | -0.20599600 |
| B | -5.83183000 | 2.52423400  | 0.19565200  |

|   |             |             |             |
|---|-------------|-------------|-------------|
| B | 4.95824300  | -3.38132700 | 1.20411700  |
| N | -5.03022400 | 3.61763900  | 0.63839800  |
| N | 5.73670600  | -2.42008100 | 0.47648600  |
| N | 5.75709500  | -0.10084200 | -0.72612100 |
| N | -2.78182300 | 4.70599700  | 1.10152800  |
| N | -0.54917000 | 5.84604700  | 1.12947900  |
| N | 5.56372000  | 2.38336900  | -1.22851500 |
| B | -5.79762200 | -2.46163400 | -1.00880700 |
| B | 0.41528600  | -5.18282500 | 1.85290200  |
| B | 0.81735100  | 5.88573400  | 0.76112800  |
| B | 4.83734600  | 3.60025800  | -1.06155200 |
| N | -0.80577200 | -5.39260900 | 1.17242000  |
| N | -2.69700300 | -4.66752400 | -0.25845500 |
| N | -4.96720600 | -3.63607800 | -0.96900700 |
| H | 1.43774200  | 6.89962500  | 0.82460900  |
| H | 3.35572300  | 5.79810000  | -0.25140600 |
| H | 5.37653100  | 4.64730400  | -1.23384800 |
| H | -7.08371400 | 0.13160600  | -0.66741500 |
| H | -7.01654100 | 2.62700100  | 0.12886500  |
| H | -6.97074000 | -2.56876300 | -1.18241500 |
| H | 0.83996600  | -6.01066200 | 2.59239700  |
| H | 2.94749800  | -5.00386200 | 2.61971200  |
| H | 5.49389000  | -4.27989600 | 1.77223100  |
| H | -5.51775500 | 4.47098000  | 0.87693100  |
| H | -3.22260200 | 5.58504800  | 1.33711700  |
| H | -0.98154800 | 6.71117800  | 1.42331600  |
| H | 6.55048700  | 2.45994600  | -1.43501700 |
| H | 6.76537100  | -0.02129800 | -0.75567400 |

|   |             |             |             |
|---|-------------|-------------|-------------|
| H | 6.74151000  | -2.52710100 | 0.52098800  |
| H | -1.29343200 | -6.26128000 | 1.34542700  |
| H | -3.07210200 | -5.60065000 | -0.14515500 |
| H | -5.44583500 | -4.52391300 | -1.04511000 |

$K^+@V_{BN}$  *h*-BN (product)

|   |             |             |             |
|---|-------------|-------------|-------------|
| K | 0.28260700  | -0.74405500 | 2.59831800  |
| B | -1.58962400 | -0.44000600 | 0.04961300  |
| B | 0.62373000  | 0.82668800  | -0.20574100 |
| B | -1.42714800 | -2.10678900 | -0.47949500 |
| B | 0.93604100  | -2.99000200 | -0.23672300 |
| B | 3.01078100  | -2.01350500 | 0.71646800  |
| B | 2.97662100  | 0.12465500  | 0.01951400  |
| B | 2.63938300  | 2.38046900  | -0.75874900 |
| B | 0.38664800  | 3.35411800  | -0.56108100 |
| B | -1.59185900 | 2.05625400  | 0.24884100  |
| B | -3.74006500 | 0.83316500  | 0.59860800  |
| B | -3.69343200 | -1.51981500 | -0.10603900 |
| N | -2.99276100 | -0.35023000 | 0.34463200  |
| N | -2.80143500 | -2.51260600 | -0.60936000 |
| N | -2.99397500 | 2.05843100  | 0.62848100  |
| N | -0.80769800 | 0.78015200  | 0.12271900  |
| N | -0.96883000 | 3.31580000  | -0.05817400 |
| N | 1.20678400  | 2.13850700  | -0.55298100 |
| N | 1.58214700  | -0.29846900 | -0.08354600 |
| N | 3.54616300  | 1.34435700  | -0.38818800 |
| N | 3.78887200  | -0.85121000 | 0.62430200  |
| N | 1.60639800  | -1.76602600 | 0.31055800  |
| N | -0.41746600 | -3.09748000 | -0.74999300 |

|   |             |             |             |
|---|-------------|-------------|-------------|
| B | -3.31223000 | -3.72829900 | -1.16876000 |
| B | -0.90694600 | -4.38790800 | -1.31479600 |
| B | 5.22409600  | -0.78766800 | 0.70000200  |
| B | 4.99652700  | 1.50326000  | -0.32855900 |
| B | -1.74095100 | 4.55906000  | 0.05214300  |
| B | -3.75525300 | 3.29025800  | 0.79259700  |
| N | -5.18529900 | 0.74268000  | 0.71028600  |
| N | -5.11732700 | -1.63944300 | -0.10545200 |
| N | 1.70061600  | -4.24372800 | -0.09039000 |
| N | 3.64350400  | -3.24695300 | 1.06132900  |
| N | 3.19436700  | 3.62830400  | -1.22258200 |
| N | 0.93948400  | 4.61724100  | -1.02789600 |
| B | -5.87547900 | -0.49104400 | 0.36572300  |
| B | 2.95838900  | -4.41613500 | 0.60702500  |
| B | 2.31800100  | 4.74687200  | -1.42489900 |
| B | -5.90258000 | 1.96571000  | 1.02296800  |
| B | 5.08253300  | -3.21717300 | 1.34344300  |
| N | -5.15806700 | 3.18049900  | 1.10056000  |
| N | 5.83053100  | -2.00431900 | 1.18537500  |
| N | 5.80812400  | 0.43759300  | 0.23049900  |
| N | -3.06926800 | 4.52227400  | 0.58513000  |
| N | -1.14388500 | 5.77784000  | -0.40333700 |
| N | 5.49685200  | 2.74292000  | -0.84586600 |
| B | -5.65341200 | -2.87716200 | -0.66458500 |
| B | 1.26809100  | -5.44722000 | -0.79023100 |
| B | 0.14964000  | 5.83307800  | -0.97878400 |
| B | 4.63734400  | 3.78720800  | -1.30853400 |
| N | 0.04605900  | -5.44042400 | -1.49274300 |

|   |             |             |             |
|---|-------------|-------------|-------------|
| N | -2.29416200 | -4.62690800 | -1.61520000 |
| N | -4.74912500 | -3.86875400 | -1.17884600 |
| H | 0.58875800  | 6.85926200  | -1.39133600 |
| H | 2.73177500  | 5.77447100  | -1.85616600 |
| H | 5.10190100  | 4.79881500  | -1.73067700 |
| H | -7.06218300 | -0.54593700 | 0.43791900  |
| H | -7.08141900 | 1.96345200  | 1.19114500  |
| H | -6.82890900 | -3.06458700 | -0.70320100 |
| H | 1.94468500  | -6.42481800 | -0.76978500 |
| H | 3.43269800  | -5.49582600 | 0.74769400  |
| H | 5.63572000  | -4.22183700 | 1.66322100  |
| H | -5.68604100 | 4.02647300  | 1.26928800  |
| H | -3.58311800 | 5.39084600  | 0.65095000  |
| H | -1.67625100 | 6.63617000  | -0.36266600 |
| H | 6.49205100  | 2.91736300  | -0.88367100 |
| H | 6.81285100  | 0.55536700  | 0.23802800  |
| H | 6.82975900  | -2.06826500 | 1.32839300  |
| H | -0.24155200 | -6.30276600 | -1.93503900 |
| H | -2.53582800 | -5.52858500 | -2.00474700 |
| H | -5.17288300 | -4.70323700 | -1.56244400 |

K@V<sub>N2B</sub> *h*-BN

|   |             |             |             |
|---|-------------|-------------|-------------|
| K | -0.00024900 | -1.42275800 | 0.30980100  |
| B | 1.43906700  | 0.57246000  | 0.07685300  |
| B | -1.43877200 | 0.57303500  | 0.07696800  |
| B | 0.00056500  | 2.69855800  | -0.15045100 |
| B | -2.52403000 | 2.87052300  | -0.06169500 |
| B | -3.84598900 | 0.78615500  | 0.24108100  |
| B | -2.50657100 | -1.22013600 | 0.22591400  |

|   |             |             |             |
|---|-------------|-------------|-------------|
| B | -1.16371800 | -3.76268700 | 0.29470800  |
| B | 1.16222100  | -3.76314400 | 0.29447500  |
| B | 2.50612500  | -1.22112900 | 0.22551100  |
| B | 3.84635400  | 0.78461500  | 0.24107200  |
| B | 2.52520300  | 2.86957400  | -0.06110900 |
| N | 2.56263000  | 1.44573000  | 0.08815400  |
| N | 0.00027500  | 1.18022400  | 0.00056800  |
| N | 1.23716800  | 3.48536400  | -0.22288200 |
| N | 3.81533800  | -0.64009100 | 0.30748500  |
| N | 2.35665300  | -2.69822800 | 0.21239200  |
| N | -0.00063300 | -3.58379300 | 1.04231000  |
| N | -2.35772600 | -2.69729700 | 0.21282100  |
| N | -3.81553000 | -0.63854100 | 0.30787400  |
| N | -2.56201200 | 1.44672600  | 0.08796700  |
| N | -1.23573700 | 3.48579800  | -0.22335000 |
| B | 1.23838600  | 4.93201900  | -0.42786700 |
| B | -1.23637600 | 4.93242600  | -0.42855300 |
| B | -5.04625300 | -1.38541100 | 0.41154900  |
| B | -3.64442000 | -3.41965800 | 0.03538300  |
| B | 3.64301200  | -3.42112100 | 0.03463200  |
| B | 5.04575100  | -1.38748100 | 0.41094600  |
| N | 5.08385100  | 1.52099600  | 0.31017300  |
| N | 3.77687100  | 3.61725700  | -0.04784700 |
| N | -3.77542800 | 3.61867000  | -0.04885600 |
| N | -5.08321600 | 1.52304400  | 0.30995100  |
| N | -1.25287200 | -4.91201200 | -0.63586000 |
| N | 1.25071000  | -4.91249200 | -0.63614400 |
| B | 5.04153100  | 2.95101800  | 0.15803900  |



|   |             |             |             |
|---|-------------|-------------|-------------|
| B | -5.04034900 | 2.95298700  | 0.15723800  |
| B | -0.00124300 | -5.53375700 | -1.00561900 |
| B | 6.32290200  | 0.78134600  | 0.48966700  |
| B | -6.32255200 | 0.78393000  | 0.48968400  |
| N | 6.27348700  | -0.63894200 | 0.55084800  |
| N | -6.27368000 | -0.63636500 | 0.55131700  |
| N | -4.91901800 | -2.79224200 | 0.30656100  |
| N | 4.91794900  | -2.79422200 | 0.30561500  |
| N | 3.66678100  | -4.77576000 | -0.45333600 |
| N | -3.66883100 | -4.77434200 | -0.45245900 |
| B | 3.74933900  | 5.04500600  | -0.25938300 |
| B | -3.74735000 | 5.04632600  | -0.26096300 |
| B | 2.52429200  | -5.47891200 | -0.94106000 |
| B | -2.52674600 | -5.47795400 | -0.94046000 |
| N | -2.48277300 | 5.65095500  | -0.46549900 |
| N | 0.00115600  | 5.61538000  | -0.57724100 |
| N | 2.48502500  | 5.65015700  | -0.46399500 |
| H | 2.64907800  | -6.50199100 | -1.54654400 |
| H | -0.00151100 | -6.53902500 | -1.65283800 |
| H | -2.65207500 | -6.50100000 | -1.54588800 |
| H | 6.04856900  | 3.58760100  | 0.19259800  |
| H | 7.36348000  | 1.35896900  | 0.57460500  |
| H | 4.75048400  | 5.69256300  | -0.26534800 |
| H | -4.74827100 | 5.69422400  | -0.26742900 |
| H | -6.04715000 | 3.58996300  | 0.19148900  |
| H | -7.36290700 | 1.36198000  | 0.57443800  |
| H | 7.14933300  | -1.13240400 | 0.65506000  |
| H | 5.74425900  | -3.37491500 | 0.25953800  |

|   |             |             |             |
|---|-------------|-------------|-------------|
| H | 4.57254900  | -5.19257100 | -0.61929800 |
| H | -4.57480500 | -5.19080700 | -0.61816100 |
| H | -5.74556400 | -3.37261400 | 0.26068800  |
| H | -7.14971700 | -1.12946400 | 0.65564900  |
| H | -2.45659400 | 6.65054400  | -0.61176300 |
| H | 0.00136200  | 6.61678600  | -0.71184700 |
| H | 2.45923600  | 6.64980300  | -0.60994000 |

K@V<sub>N2B</sub> *h*-BN (reactant)

|   |             |             |             |
|---|-------------|-------------|-------------|
| K | 0.00112700  | -0.71999700 | 2.48802100  |
| B | -1.35584600 | 0.36332400  | -0.23225100 |
| B | 1.35668200  | 0.36024900  | -0.23201500 |
| B | 0.00279300  | 2.48128900  | 0.28676100  |
| B | 2.44699600  | 2.70575300  | -0.07824100 |
| B | 3.67429300  | 0.72422000  | -0.83691400 |
| B | 2.35676400  | -1.20117500 | -0.35373000 |
| B | 1.16615100  | -3.28542400 | 0.53306800  |
| B | -1.17366900 | -3.28203300 | 0.53864500  |
| B | -2.36048100 | -1.19576100 | -0.34848100 |
| B | -3.67195600 | 0.73187600  | -0.84012200 |
| B | -2.43952900 | 2.71236700  | -0.08749600 |
| N | -2.42398100 | 1.33418400  | -0.43980700 |
| N | 0.00112300  | 0.98030000  | 0.03275100  |
| N | -1.21795400 | 3.26689900  | 0.41751000  |
| N | -3.62777100 | -0.68326700 | -0.87237700 |
| N | -2.39175200 | -2.58891000 | 0.02936600  |
| N | -0.00219500 | -2.55612200 | 0.75075300  |
| N | 2.38443900  | -2.59544900 | 0.02004100  |
| N | 3.62535900  | -0.69055900 | -0.87649600 |

|   |             |             |             |
|---|-------------|-------------|-------------|
| N | 2.42806500  | 1.32866100  | -0.43445800 |
| N | 1.22542800  | 3.26300300  | 0.42371800  |
| B | -1.22838100 | 4.65742400  | 0.84542500  |
| B | 1.23830600  | 4.65322600  | 0.85250000  |
| B | 4.83884200  | -1.43024100 | -1.08410600 |
| B | 3.59703000  | -3.39213600 | -0.20127300 |
| B | -3.60737100 | -3.38238200 | -0.18680900 |
| B | -4.84371500 | -1.41995000 | -1.07632400 |
| N | -4.87540100 | 1.49298300  | -1.08407900 |
| N | -3.66751800 | 3.49316900  | -0.21131000 |
| N | 3.67777600  | 3.48299800  | -0.19656400 |
| N | 4.88038500  | 1.48259900  | -1.07629000 |
| N | 1.23442300  | -4.75805600 | 0.73046300  |
| N | -1.24566500 | -4.75420900 | 0.73776400  |
| B | -4.86561600 | 2.89439400  | -0.76205800 |
| B | 4.87487000  | 2.88250400  | -0.74765100 |
| B | -0.00616000 | -5.45785400 | 0.92205800  |
| B | -6.06621000 | 0.75350000  | -1.47287100 |
| B | 6.06880100  | 0.74115200  | -1.46867100 |
| N | -6.01503300 | -0.66906700 | -1.49022800 |
| N | 6.01270500  | -0.68110900 | -1.49403700 |
| N | 4.78242200  | -2.81880400 | -0.79417200 |
| N | -4.79193600 | -2.80725400 | -0.77954500 |
| N | -3.63290200 | -4.76574900 | 0.20752000  |
| N | 3.61903200  | -4.77679400 | 0.18861600  |
| B | -3.67795300 | 4.84988800  | 0.27898200  |
| B | 3.69092700  | 4.83846000  | 0.29715100  |
| B | -2.47553100 | -5.47720900 | 0.63384600  |

|   |             |             |             |
|---|-------------|-------------|-------------|
| B | 2.46129400  | -5.48503400 | 0.61922400  |
| N | 2.49103300  | 5.36367300  | 0.85468500  |
| N | 0.00498700  | 5.27724800  | 1.21437600  |
| N | -2.47855400 | 5.37228400  | 0.84018300  |
| H | -2.54565300 | -6.64708700 | 0.87654800  |
| H | -0.00725400 | -6.62717200 | 1.17730300  |
| H | 2.52862000  | -6.65554000 | 0.85967700  |
| H | -5.84567600 | 3.55778300  | -0.91282500 |
| H | -7.07683600 | 1.33003300  | -1.74283500 |
| H | -4.66327300 | 5.52110500  | 0.22440500  |
| H | 4.67867700  | 5.50651300  | 0.24789000  |
| H | 5.85741500  | 3.54325400  | -0.89380600 |
| H | 7.08150700  | 1.31567600  | -1.73510700 |
| H | -6.87088000 | -1.16098300 | -1.70747000 |
| H | -5.60740800 | -3.39360100 | -0.89229300 |
| H | -4.49084300 | -5.28703400 | 0.09315900  |
| H | 4.47482300  | -5.30064200 | 0.06994600  |
| H | 5.59595400  | -3.40728100 | -0.90980300 |
| H | 6.86696500  | -1.17472200 | -1.71366200 |
| H | 2.50573100  | 6.32355200  | 1.17051000  |
| H | 0.00588600  | 6.25266200  | 1.47964500  |
| H | -2.49143000 | 6.33271100  | 1.15441300  |

K@V<sub>N2B</sub> *h*-BN (product)

|   |             |             |             |
|---|-------------|-------------|-------------|
| K | -0.00032700 | -1.42282700 | -0.30967500 |
| B | -1.43872200 | 0.57313600  | -0.07688800 |
| B | 1.43903100  | 0.57247000  | -0.07699200 |
| B | 0.00064600  | 2.69859100  | 0.15052200  |
| B | 2.52528200  | 2.86950800  | 0.06103300  |

|   |             |             |             |
|---|-------------|-------------|-------------|
| B | 3.84633800  | 0.78450700  | -0.24133400 |
| B | 2.50607300  | -1.22120900 | -0.22562500 |
| B | 1.16214800  | -3.76322100 | -0.29431800 |
| B | -1.16380100 | -3.76272500 | -0.29474500 |
| B | -2.50660900 | -1.22005600 | -0.22596600 |
| B | -3.84594800 | 0.78628600  | -0.24108300 |
| B | -2.52393800 | 2.87062100  | 0.06176400  |
| N | -2.56195600 | 1.44683700  | -0.08790500 |
| N | 0.00029200  | 1.18026000  | -0.00056400 |
| N | -1.23562600 | 3.48585800  | 0.22346000  |
| N | -3.81554400 | -0.63842100 | -0.30795500 |
| N | -2.35781400 | -2.69723300 | -0.21290300 |
| N | -0.00066000 | -3.58383400 | -1.04223600 |
| N | 2.35660000  | -2.69830400 | -0.21227500 |
| N | 3.81528600  | -0.64020500 | -0.30766200 |
| N | 2.56264600  | 1.44567600  | -0.08834200 |
| N | 1.23728100  | 3.48533000  | 0.22298500  |
| B | -1.23621000 | 4.93247900  | 0.42867100  |
| B | 1.23855600  | 4.93196600  | 0.42809100  |
| B | 5.04569800  | -1.38764000 | -0.41101400 |
| B | 3.64294000  | -3.42119800 | -0.03443900 |
| B | -3.64453300 | -3.41957100 | -0.03552800 |
| B | -5.04629200 | -1.38524900 | -0.41165800 |
| N | -5.08314400 | 1.52321800  | -0.30997100 |
| N | -3.77530300 | 3.61881400  | 0.04888000  |
| N | 3.77697200  | 3.61715000  | 0.04770200  |
| N | 5.08386200  | 1.52085600  | -0.31052900 |
| N | 1.25056400  | -4.91253000 | 0.63632900  |

|   |             |             |             |
|---|-------------|-------------|-------------|
| N | -1.25304100 | -4.91204700 | 0.63581400  |
| B | -5.04023900 | 2.95316600  | -0.15725200 |
| B | 5.04159300  | 2.95088000  | -0.15836600 |
| B | -0.00143600 | -5.53379400 | 1.00568900  |
| B | -6.32250200 | 0.78414900  | -0.48974400 |
| B | 6.32288800  | 0.78115200  | -0.48998400 |
| N | -6.27368900 | -0.63614800 | -0.55140200 |
| N | 6.27344000  | -0.63915200 | -0.55100900 |
| N | 4.91785700  | -2.79438400 | -0.30551200 |
| N | -4.91910400 | -2.79208900 | -0.30669800 |
| N | -3.66900500 | -4.77427100 | 0.45227900  |
| N | 3.66665800  | -4.77578900 | 0.45369900  |
| B | -3.74717100 | 5.04647500  | 0.26095000  |
| B | 3.74950800  | 5.04487300  | 0.25944200  |
| B | -2.52696600 | -5.47794900 | 0.94030500  |
| B | 2.52413900  | -5.47892200 | 0.94137900  |
| N | 2.48523500  | 5.65003700  | 0.46429600  |
| N | 0.00135000  | 5.61536500  | 0.57747700  |
| N | -2.48257500 | 5.65106100  | 0.46551700  |
| H | -2.65236900 | -6.50101800 | 1.54568000  |
| H | -0.00176700 | -6.53907300 | 1.65289000  |
| H | 2.64888100  | -6.50197400 | 1.54691800  |
| H | -6.04701900 | 3.59017100  | -0.19154900 |
| H | -7.36283400 | 1.36224100  | -0.57451100 |
| H | -4.74806200 | 5.69442000  | 0.26734800  |
| H | 4.75067500  | 5.69239500  | 0.26538500  |
| H | 6.04864400  | 3.58743800  | -0.19301600 |
| H | 7.36348100  | 1.35873700  | -0.57499600 |

|   |             |             |             |
|---|-------------|-------------|-------------|
| H | -7.14974600 | -1.12920800 | -0.65574500 |
| H | -5.74567700 | -3.37242600 | -0.26085700 |
| H | -4.57500000 | -5.19070500 | 0.61794600  |
| H | 4.57241500  | -5.19259800 | 0.61972900  |
| H | 5.74415000  | -3.37509700 | -0.25939800 |
| H | 7.14927700  | -1.13264900 | -0.65512900 |
| H | 2.45949700  | 6.64966500  | 0.61037100  |
| H | 0.00158800  | 6.61676800  | 0.71211100  |
| H | -2.45636300 | 6.65065500  | 0.61174900  |

H<sub>2</sub>O-Li@V<sub>N<sub>2</sub>B</sub> *h*-BN-H<sub>2</sub>O

|    |             |             |             |
|----|-------------|-------------|-------------|
| Li | 0.00864900  | -1.00756900 | -0.25465500 |
| B  | -1.43452100 | 0.43161300  | 0.04073800  |
| B  | 1.36912000  | 0.55957500  | 0.04307600  |
| B  | -0.13624400 | 2.62329600  | -0.22335600 |
| B  | 2.32659200  | 2.94060300  | 0.09686700  |
| B  | 3.73412400  | 0.95419400  | 0.43099700  |
| B  | 2.50414400  | -1.07463500 | 0.00847200  |
| B  | 1.37617900  | -3.37520600 | -0.44707400 |
| B  | -1.04185800 | -3.49595200 | -0.34101300 |
| B  | -2.38265400 | -1.31733400 | 0.13070100  |
| B  | -3.83053000 | 0.59156100  | 0.38486100  |
| B  | -2.63582900 | 2.69129000  | -0.08326400 |
| N  | -2.58857100 | 1.28063400  | 0.13370800  |
| N  | -0.06333400 | 1.11050300  | -0.05391500 |
| N  | -1.39703500 | 3.35341300  | -0.35482800 |
| N  | -3.71422400 | -0.82282500 | 0.43349500  |
| N  | -2.30145900 | -2.76728100 | -0.03983700 |
| N  | 0.13317600  | -2.76688500 | -0.45485700 |

|   |             |             |             |
|---|-------------|-------------|-------------|
| N | 2.57183400  | -2.52005400 | -0.21028500 |
| N | 3.78161600  | -0.46216700 | 0.32597100  |
| N | 2.42325700  | 1.52042500  | 0.22786300  |
| N | 1.04596800  | 3.48318600  | -0.23884700 |
| B | -1.46710700 | 4.77607400  | -0.66467500 |
| B | 0.98879300  | 4.91193100  | -0.52346300 |
| B | 5.05579200  | -1.13202300 | 0.43643100  |
| B | 3.85839100  | -3.22358300 | -0.14783200 |
| B | -3.49639900 | -3.59956800 | 0.13505400  |
| B | -4.90320700 | -1.61776900 | 0.62586900  |
| N | -5.09041600 | 1.27790900  | 0.54350500  |
| N | -3.91596000 | 3.39191800  | -0.03819700 |
| N | 3.51564200  | 3.77161100  | 0.26548100  |
| N | 4.90739200  | 1.75568200  | 0.68559100  |
| N | 1.49363800  | -4.83746500 | -0.59437700 |
| N | -1.01404700 | -4.96639300 | -0.46864700 |
| B | -5.12942700 | 2.69618800  | 0.31479300  |
| B | 4.78758000  | 3.18579900  | 0.60840800  |
| B | 0.26969400  | -5.60375600 | -0.63958200 |
| B | -6.27316100 | 0.48863000  | 0.83315400  |
| B | 6.17575300  | 1.08107000  | 0.88671900  |
| N | -6.14615900 | -0.92564100 | 0.89111700  |
| N | 6.21589200  | -0.33482200 | 0.76867500  |
| N | 5.07052100  | -2.52856100 | 0.19078600  |
| N | -4.76049700 | -3.02319100 | 0.50818400  |
| N | -3.41894900 | -5.02556800 | -0.06532800 |
| N | 3.91818400  | -4.63994900 | -0.40947300 |
| B | -3.96805500 | 4.79081000  | -0.38775200 |



|   |             |             |             |
|---|-------------|-------------|-------------|
| B | 3.43440600  | 5.18744600  | -0.00226000 |
| B | -2.22013200 | -5.73325400 | -0.35752800 |
| B | 2.77942000  | -5.46923500 | -0.61640600 |
| N | 2.18794900  | 5.70391800  | -0.43668800 |
| N | -0.26058200 | 5.50573800  | -0.85758300 |
| N | -2.74927000 | 5.42766500  | -0.73347300 |
| H | -2.23393700 | -6.92164100 | -0.48865500 |
| H | 0.32451100  | -6.78990700 | -0.78367800 |
| H | 2.90945900  | -6.64599800 | -0.78283200 |
| H | -6.15839400 | 3.29308300  | 0.39830800  |
| H | -7.32991700 | 1.01668700  | 1.00485300  |
| H | -4.99787900 | 5.39301500  | -0.38926900 |
| H | 4.38423600  | 5.89832600  | 0.12273700  |
| H | 5.73759100  | 3.88183600  | 0.79468600  |
| H | 7.16474700  | 1.70374100  | 1.12956600  |
| H | -6.98374900 | -1.46444000 | 1.06270200  |
| H | -5.55882500 | -3.63224700 | 0.62168800  |
| H | -4.26763600 | -5.56542500 | 0.03271600  |
| H | 4.82435600  | -5.08723200 | -0.39577300 |
| H | 5.93482900  | -3.04996100 | 0.23919000  |
| H | 7.11125200  | -0.78961500 | 0.88190400  |
| H | 2.12765300  | 6.69357800  | -0.63139200 |
| H | -0.30429200 | 6.49684400  | -1.04886600 |
| H | -2.77834700 | 6.41127400  | -0.96290700 |
| O | -0.02477200 | -0.91490100 | -2.49570700 |
| H | 0.04735500  | -1.85280400 | -2.22303000 |
| H | -0.07744300 | -0.85467900 | -3.45518400 |
| O | 0.23296200  | -1.20950100 | 2.19762600  |

|   |            |             |            |
|---|------------|-------------|------------|
| H | 0.15861800 | -1.12696300 | 3.15593300 |
| H | 0.65804500 | -2.06101200 | 2.02994700 |

H<sub>2</sub>O-Li@V<sub>N2B</sub> *h*-BN-H<sub>2</sub>O (reactant)

|    |             |             |             |
|----|-------------|-------------|-------------|
| Li | -0.22444100 | -0.83782600 | 1.08551400  |
| B  | 1.42541300  | 0.43673200  | -0.22362700 |
| B  | -1.26555800 | 0.17984200  | -0.65277800 |
| B  | -0.07187200 | 2.40901100  | 0.20505300  |
| B  | -2.42991300 | 2.56026800  | -0.69462500 |
| B  | -3.71388900 | 0.56660100  | -0.80027600 |
| B  | -2.38975900 | -1.20861800 | 0.07285100  |
| B  | -1.08500600 | -3.32933700 | 0.44681400  |
| B  | 1.34406300  | -3.28341300 | -0.17248600 |
| B  | 2.47542500  | -1.05107800 | -0.60505800 |
| B  | 3.80165700  | 0.89547600  | -0.35731300 |
| B  | 2.38889800  | 2.70436200  | 0.50950500  |
| N  | 2.50797200  | 1.39040100  | -0.01159400 |
| N  | 0.04676500  | 0.93196900  | -0.04526900 |
| N  | 1.06318100  | 3.20772300  | 0.70017000  |
| N  | 3.78448600  | -0.46100300 | -0.80036000 |
| N  | 2.48644900  | -2.51364700 | -0.61222300 |
| N  | 0.06306200  | -2.64803700 | -0.08190400 |
| N  | -2.33222900 | -2.61620300 | 0.50054000  |
| N  | -3.71562200 | -0.76845600 | -0.26814000 |
| N  | -2.42301800 | 1.16153200  | -0.90479300 |
| N  | -1.27681300 | 3.18812000  | -0.07493300 |
| B  | 0.94876000  | 4.59790600  | 1.10065900  |
| B  | -1.37348900 | 4.60186400  | 0.25190600  |
| B  | -4.93886000 | -1.49722400 | -0.07638500 |

|   |             |             |             |
|---|-------------|-------------|-------------|
| B | -3.54746800 | -3.37552200 | 0.78731000  |
| B | 3.73684700  | -3.24406900 | -0.85954700 |
| B | 5.02246200  | -1.13732400 | -1.06108300 |
| N | 5.01312500  | 1.66375400  | -0.20817500 |
| N | 3.60167000  | 3.48145500  | 0.77742100  |
| N | -3.64934300 | 3.33704100  | -0.99481200 |
| N | -4.96464600 | 1.24044700  | -1.09846300 |
| N | -0.95299000 | -4.69803600 | 0.92100200  |
| N | 1.45015600  | -4.68563500 | 0.21212500  |
| B | 4.89994700  | 2.97042900  | 0.40004800  |
| B | -4.89281900 | 2.66664000  | -1.28457500 |
| B | 0.31058300  | -5.37568100 | 0.76731700  |
| B | 6.25401000  | 1.02563200  | -0.60474000 |
| B | -6.19694800 | 0.49687100  | -0.97807000 |
| N | 6.22608300  | -0.33351700 | -1.05106100 |
| N | -6.16087500 | -0.85044400 | -0.49053700 |
| N | -4.83354700 | -2.79581900 | 0.53108800  |
| N | 4.94580600  | -2.55632900 | -1.21914800 |
| N | 3.74266800  | -4.67587400 | -0.67005800 |
| N | -3.38923600 | -4.71710900 | 1.30668500  |
| B | 3.45126600  | 4.79490600  | 1.36120000  |
| B | -3.66337200 | 4.76049800  | -0.78291300 |
| B | 2.67550900  | -5.39679000 | -0.07449600 |
| B | -2.13873700 | -5.38961000 | 1.38273300  |
| N | -2.53305400 | 5.35145800  | -0.15860600 |
| N | -0.31369400 | 5.24197900  | 0.97382900  |
| N | 2.13374800  | 5.29302600  | 1.55231600  |
| H | 2.78624300  | -6.55941800 | 0.17181700  |

|   |             |             |             |
|---|-------------|-------------|-------------|
| H | 0.41334300  | -6.51865900 | 1.09360000  |
| H | -2.07421600 | -6.50813200 | 1.79544100  |
| H | 5.87816000  | 3.62680000  | 0.59226900  |
| H | 7.29108100  | 1.61494400  | -0.54387400 |
| H | 4.40162300  | 5.45369900  | 1.65960900  |
| H | -4.60696300 | 5.42759800  | -1.08622700 |
| H | -5.86248400 | 3.29092600  | -1.59358300 |
| H | -7.24511400 | 0.99963300  | -1.25614300 |
| H | 7.11461600  | -0.75991700 | -1.27554000 |
| H | 5.78682700  | -3.10023700 | -1.35645500 |
| H | 4.59791100  | -5.18206800 | -0.85458400 |
| H | -4.21309200 | -5.23968600 | 1.57168400  |
| H | -5.66488000 | -3.34277100 | 0.70912100  |
| H | -7.04432300 | -1.33296900 | -0.40090600 |
| H | -2.55804400 | 6.34532700  | 0.02105900  |
| H | -0.39730500 | 6.22402100  | 1.19732000  |
| H | 2.03867200  | 6.23896700  | 1.89522800  |
| O | -0.07301100 | -0.71585300 | 2.99470100  |
| H | -0.64990600 | -1.21968200 | 3.58290700  |
| H | -0.02625000 | 0.18016000  | 3.35362900  |
| O | -0.73804000 | -0.48160300 | -1.87640400 |
| H | -1.46214000 | -0.70063300 | -2.47571800 |
| H | -0.11849800 | -1.91821400 | -0.78639800 |

H<sub>2</sub>O-Li<sup>+</sup>@V<sub>N2B</sub> *h*-BN-H<sub>2</sub>O

|    |             |             |             |
|----|-------------|-------------|-------------|
| Li | 0.25611000  | -1.10548900 | -0.08547900 |
| B  | -1.46078700 | 0.18811900  | -0.05702200 |
| B  | 1.23624200  | 0.78914800  | 0.02231000  |
| B  | -0.57733700 | 2.58275400  | -0.07260600 |

|   |             |             |             |
|---|-------------|-------------|-------------|
| B | 1.75891700  | 3.24819900  | 0.52533400  |
| B | 3.51746600  | 1.53639300  | 0.34192700  |
| B | 2.60137300  | -0.59711200 | -0.26973200 |
| B | 1.88126900  | -3.08330000 | -0.67928900 |
| B | -0.47999200 | -3.64032000 | -0.04810200 |
| B | -2.09302000 | -1.62296900 | 0.26429300  |
| B | -3.86846900 | -0.06170300 | -0.04272600 |
| B | -3.00222500 | 2.18232400  | -0.53749400 |
| N | -2.73630400 | 0.79715300  | -0.27516600 |
| N | -0.24455100 | 1.07826300  | -0.02914100 |
| N | -1.89235100 | 3.07840500  | -0.44479200 |
| N | -3.49844800 | -1.38296000 | 0.36108800  |
| N | -1.70372500 | -3.03706900 | 0.43638700  |
| N | 0.47361200  | -2.91764800 | -0.83518600 |
| N | 2.85264800  | -2.01506800 | -0.59840900 |
| N | 3.78123000  | 0.18235600  | -0.03701900 |
| N | 2.11472000  | 1.86763800  | 0.34448100  |
| N | 0.40029900  | 3.60398900  | 0.25490700  |
| B | -2.19189100 | 4.50597700  | -0.58179700 |
| B | 0.08386600  | 5.03474200  | 0.24307500  |
| B | 5.15853600  | -0.24800500 | -0.15927400 |
| B | 4.25757400  | -2.47883400 | -0.76989400 |
| B | -2.71942300 | -4.01494800 | 0.91720300  |
| B | -4.53206200 | -2.33023000 | 0.71715000  |
| N | -5.22912600 | 0.35679700  | -0.18780200 |
| N | -4.36368300 | 2.61194700  | -0.80639700 |
| N | 2.77918200  | 4.21284200  | 0.89331400  |
| N | 4.54937300  | 2.47351000  | 0.67110600  |

|   |             |             |             |
|---|-------------|-------------|-------------|
| N | 2.20840900  | -4.51017000 | -0.64700400 |
| N | -0.11356100 | -5.03609800 | 0.14355900  |
| B | -5.47769500 | 1.70947900  | -0.63827500 |
| B | 4.16643700  | 3.82952700  | 0.99408100  |
| B | 1.21491900  | -5.47191600 | -0.22835900 |
| B | -6.27508600 | -0.59185700 | 0.15752600  |
| B | 5.93159800  | 2.03204900  | 0.59211200  |
| N | -5.89567100 | -1.88828300 | 0.62655700  |
| N | 6.19161000  | 0.69457400  | 0.16852000  |
| N | 5.35673600  | -1.58849100 | -0.59231500 |
| N | -4.07781000 | -3.62203200 | 1.11635900  |
| N | -2.32176100 | -5.38089100 | 1.13448000  |
| N | 4.51339500  | -3.85938900 | -1.09746700 |
| B | -4.60298500 | 4.00899400  | -1.11539100 |
| B | 2.40794500  | 5.60829400  | 1.02819800  |
| B | -1.07225100 | -5.93159800 | 0.75738800  |
| B | 3.56805500  | -4.90204900 | -0.96556400 |
| N | 1.07661200  | 5.96853500  | 0.69659400  |
| N | -1.18892100 | 5.45285200  | -0.23613300 |
| N | -3.50265600 | 4.89969700  | -1.02120000 |
| H | -0.81443600 | -7.07947200 | 0.93347000  |
| H | 1.51194100  | -6.61873100 | -0.12964900 |
| H | 3.86615100  | -6.04725300 | -1.08507300 |
| H | -6.58988200 | 2.07943600  | -0.84011200 |
| H | -7.42325300 | -0.29428900 | 0.06059000  |
| H | -5.68808800 | 4.39700000  | -1.41265100 |
| H | 3.19946900  | 6.42496100  | 1.37851800  |
| H | 4.99146300  | 4.62637400  | 1.30830900  |

|   |             |             |             |
|---|-------------|-------------|-------------|
| H | 6.82428500  | 2.77080800  | 0.86324800  |
| H | -6.64416000 | -2.52537700 | 0.86447100  |
| H | -4.74408800 | -4.32799000 | 1.40038900  |
| H | -3.00841900 | -6.01893900 | 1.51479700  |
| H | 5.47039900  | -4.12753400 | -1.28582700 |
| H | 6.29370400  | -1.95327700 | -0.69968100 |
| H | 7.16055900  | 0.41243600  | 0.10440500  |
| H | 0.83373100  | 6.94881200  | 0.74530300  |
| H | -1.40179300 | 6.44004100  | -0.28163300 |
| H | -3.68432700 | 5.88076300  | -1.18529200 |
| O | 0.01912600  | -0.73983200 | -2.35347500 |
| H | -0.04032600 | -1.63301600 | -2.71915900 |
| H | -0.46437600 | -0.15072200 | -2.94678900 |
| O | 0.57054600  | -1.57431300 | 1.91051000  |
| H | -0.14899500 | -1.94978100 | 2.43569400  |
| H | 1.15509100  | -1.11362300 | 2.52622500  |

H<sub>2</sub>O-Li<sup>+</sup>@V<sub>N2B</sub> *h*-BN-H<sub>2</sub>O (reactant)

|    |             |             |             |
|----|-------------|-------------|-------------|
| Li | 0.48228200  | -0.78262000 | -1.23653900 |
| B  | 0.76572000  | 1.00895300  | 0.77722800  |
| B  | -1.58529100 | -0.05302400 | 0.23646700  |
| B  | -1.04974900 | 2.44072100  | -0.15216300 |
| B  | -3.42157400 | 1.69078300  | -0.21626600 |
| B  | -3.90441500 | -0.65143200 | 0.39588100  |
| B  | -1.87215900 | -1.92567700 | 0.41675600  |
| B  | 0.10331100  | -3.56294500 | -0.08233500 |
| B  | 2.48436400  | -2.79519000 | -0.44549800 |
| B  | 3.00787300  | -0.39276600 | -0.24150500 |
| B  | 3.18838100  | 1.93381900  | 0.59903700  |

|   |             |             |             |
|---|-------------|-------------|-------------|
| B | 1.24159400  | 3.41643400  | 0.29974600  |
| N | 1.73575400  | 2.08106300  | 0.60337500  |
| N | -0.56781700 | 1.04083200  | 0.16037900  |
| N | -0.13678900 | 3.57011500  | -0.10035500 |
| N | 3.78695900  | 0.65102400  | 0.28452600  |
| N | 3.44212100  | -1.72346100 | -0.37230500 |
| N | 1.08851800  | -2.49808900 | -0.15810000 |
| N | -1.26590200 | -3.26475500 | 0.31293800  |
| N | -3.29845400 | -1.92367400 | 0.63600000  |
| N | -2.94504800 | 0.38105200  | 0.11279800  |
| N | -2.43990000 | 2.71493900  | -0.43482300 |
| B | -0.61103300 | 4.92082100  | -0.42407100 |
| B | -2.92093100 | 4.05411600  | -0.76184300 |
| B | -4.15729100 | -3.05622200 | 0.88702900  |
| B | -2.14151500 | -4.45049800 | 0.52152200  |
| B | 4.88094200  | -1.99022400 | -0.31821600 |
| B | 5.23593300  | 0.41677000  | 0.37966500  |
| N | 4.06365100  | 3.05324800  | 0.83706700  |
| N | 2.13400400  | 4.55639500  | 0.40993800  |
| N | -4.85085700 | 1.92811700  | -0.31126100 |
| N | -5.31898000 | -0.42418700 | 0.40393800  |
| N | 0.56046300  | -4.89986000 | -0.42895500 |
| N | 2.92160800  | -4.12465300 | -0.75957800 |
| B | 3.51508200  | 4.38730100  | 0.77920500  |
| B | -5.79927300 | 0.88596500  | 0.02286300  |
| B | 1.93782700  | -5.18171800 | -0.76869900 |
| B | 5.49488700  | 2.84310100  | 0.97324200  |
| B | -6.17804500 | -1.54511200 | 0.75374600  |



|   |             |             |             |
|---|-------------|-------------|-------------|
| N | 6.03332200  | 1.53267700  | 0.78578000  |
| N | -5.57100600 | -2.81165200 | 1.01206800  |
| N | -3.50746000 | -4.32103500 | 0.92494400  |
| N | 5.73347800  | -0.89004800 | 0.03475000  |
| N | 5.28056300  | -3.33319600 | -0.62561200 |
| N | -1.61557600 | -5.76555400 | 0.27108500  |
| B | 1.64287700  | 5.89049300  | 0.12167500  |
| B | -5.30827300 | 3.24160900  | -0.72049600 |
| B | 4.34966300  | -4.38885800 | -0.87894800 |
| B | -0.33085700 | -6.03098700 | -0.24950500 |
| N | -4.32968700 | 4.24531600  | -0.96576700 |
| N | -1.96670700 | 5.11014300  | -0.82755200 |
| N | 0.30153100  | 6.02331400  | -0.31248600 |
| H | 4.73780200  | -5.48049000 | -1.14948700 |
| H | 2.26718600  | -6.29340500 | -1.03165000 |
| H | 0.01694800  | -7.13773800 | -0.51247500 |
| H | 4.20982900  | 5.33083500  | 0.97952700  |
| H | 6.21444600  | 3.75525800  | 1.22937200  |
| H | 2.35152200  | 6.83972500  | 0.23545200  |
| H | -6.46855700 | 3.47763500  | -0.84376000 |
| H | -6.96780400 | 1.10566500  | -0.02138500 |
| H | -7.35986100 | -1.41300700 | 0.81128100  |
| H | 7.03456800  | 1.42940400  | 0.88457800  |
| H | 6.73273900  | -1.04493600 | 0.07476000  |
| H | 6.26265100  | -3.57327500 | -0.65852800 |
| H | -2.23213500 | -6.55563700 | 0.40642700  |
| H | -4.04635500 | -5.16576500 | 1.06149900  |
| H | -6.19144400 | -3.58103700 | 1.22591700  |

|   |             |             |             |
|---|-------------|-------------|-------------|
| H | -4.66598500 | 5.16450800  | -1.21958900 |
| H | -2.28356000 | 6.04733600  | -1.03676100 |
| H | -0.03255000 | 6.95506700  | -0.51831000 |
| O | 1.00607900  | -0.06940400 | 1.62643000  |
| H | 0.95746500  | -1.77056600 | 0.54881500  |
| H | 1.83969700  | 0.01124400  | 2.10811000  |
| O | 0.06298500  | -0.71232700 | -3.07176700 |
| H | -0.02962500 | 0.08188100  | -3.61374400 |
| H | -0.06109100 | -1.46865000 | -3.65985900 |

H<sub>2</sub>O-Na@V<sub>N2B</sub> *h*-BN-H<sub>2</sub>O

|    |             |             |             |
|----|-------------|-------------|-------------|
| Na | -0.03356900 | -1.22505700 | -0.34762400 |
| B  | -1.38416700 | 0.60874900  | -0.10675000 |
| B  | 1.42150400  | 0.52818100  | -0.10899600 |
| B  | 0.07732200  | 2.68577300  | 0.24040000  |
| B  | 2.57109500  | 2.81460100  | -0.02857900 |
| B  | 3.81804600  | 0.72477300  | -0.41864100 |
| B  | 2.40888000  | -1.20766300 | -0.19485900 |
| B  | 1.07942700  | -3.56845900 | -0.04751500 |
| B  | -1.26325400 | -3.50654000 | -0.13998500 |
| B  | -2.46467500 | -1.07169300 | -0.30257900 |
| B  | -3.77176900 | 0.94449000  | -0.38072900 |
| B  | -2.41896400 | 2.93528300  | 0.15663700  |
| N  | -2.47942800 | 1.53407300  | -0.12267400 |
| N  | 0.03362900  | 1.17514600  | 0.01507200  |
| N  | -1.12775900 | 3.49782600  | 0.41337000  |
| N  | -3.76363500 | -0.47363000 | -0.50123500 |
| N  | -2.43294400 | -2.53591000 | -0.20311900 |
| N  | -0.05806200 | -3.26471900 | -0.80218900 |

|   |             |             |             |
|---|-------------|-------------|-------------|
| N | 2.29413600  | -2.66174400 | -0.02615400 |
| N | 3.74219000  | -0.69476400 | -0.39184200 |
| N | 2.55658800  | 1.39708900  | -0.20900300 |
| N | 1.32445700  | 3.44813500  | 0.28377000  |
| B | -1.08780300 | 4.91624600  | 0.75334000  |
| B | 1.37480000  | 4.87305000  | 0.59312200  |
| B | 4.95449900  | -1.47098000 | -0.47057100 |
| B | 3.55129800  | -3.41962500 | 0.15589800  |
| B | -3.73610000 | -3.23236000 | -0.12237700 |
| B | -5.01331500 | -1.17604100 | -0.65936800 |
| N | -4.98317400 | 1.72106000  | -0.47261800 |
| N | -3.64816600 | 3.72230900  | 0.17069400  |
| N | 3.83058500  | 3.54386700  | -0.13592500 |
| N | 5.06302300  | 1.42976400  | -0.59649400 |
| N | 1.08429500  | -4.74724500 | 0.85420300  |
| N | -1.39995900 | -4.68527300 | 0.75119000  |
| B | -4.91478500 | 3.12816000  | -0.18022800 |
| B | 5.06043400  | 2.86125900  | -0.46009900 |
| B | -0.18782400 | -5.34914900 | 1.16132500  |
| B | -6.22576100 | 1.02873000  | -0.76284600 |
| B | 6.27147700  | 0.65099000  | -0.80159000 |
| N | -6.20623000 | -0.38983600 | -0.87496500 |
| N | 6.18662900  | -0.76842900 | -0.74636300 |
| N | 4.82702200  | -2.85805800 | -0.19876700 |
| N | -4.96096000 | -2.58650300 | -0.51455000 |
| N | -3.80292700 | -4.57861900 | 0.38626900  |
| N | 3.51400400  | -4.74597000 | 0.71933700  |
| B | -3.58978000 | 5.11183900  | 0.55838700  |

|   |             |             |             |
|---|-------------|-------------|-------------|
| B | 3.85265400  | 4.95780900  | 0.15222800  |
| B | -2.69226300 | -5.26929100 | 0.95070000  |
| B | 2.32722100  | -5.37985900 | 1.18404200  |
| N | 2.63392600  | 5.56815400  | 0.54219200  |
| N | 0.17099500  | 5.55563000  | 0.92356100  |
| N | -2.31919500 | 5.65194700  | 0.87839700  |
| H | -2.84476100 | -6.29890100 | 1.53750000  |
| H | -0.24018100 | -6.37012800 | 1.78054700  |
| H | 2.37841700  | -6.40442300 | 1.79687600  |
| H | -5.90090500 | 3.79723000  | -0.21193200 |
| H | -7.24525700 | 1.63632400  | -0.88708000 |
| H | -4.57395900 | 5.78370900  | 0.60936300  |
| H | 4.86045700  | 5.59135400  | 0.07803600  |
| H | 6.07134800  | 3.48036700  | -0.58661400 |
| H | 7.31786700  | 1.19251400  | -0.99121400 |
| H | -7.08731100 | -0.85766200 | -1.03713500 |
| H | -5.81349100 | -3.12958600 | -0.50666100 |
| H | -4.71564800 | -5.00210600 | 0.48135700  |
| H | 4.39465900  | -5.20905900 | 0.89636200  |
| H | 5.64695400  | -3.44553800 | -0.13512900 |
| H | 7.04402400  | -1.29215500 | -0.85561500 |
| H | 2.64722700  | 6.55697300  | 0.74992400  |
| H | 0.20172200  | 6.54311200  | 1.13530400  |
| H | -2.27341600 | 6.62843800  | 1.13446000  |
| O | 0.15700500  | -1.39186600 | -2.76410900 |
| H | 0.07564500  | -2.25260700 | -2.25497100 |
| H | -0.59233700 | -1.38051900 | -3.37184300 |
| O | -0.09051800 | -1.71560000 | 2.17620200  |

|   |             |             |            |
|---|-------------|-------------|------------|
| H | 0.68374200  | -2.28735300 | 2.28157900 |
| H | -0.84168100 | -2.31608700 | 2.28707900 |

H<sub>2</sub>O-Na@V<sub>N2B</sub> *h*-BN-H<sub>2</sub>O (reactant)

|    |             |             |             |
|----|-------------|-------------|-------------|
| Na | 0.19242400  | -0.86047500 | -1.55439700 |
| B  | 1.27917000  | 0.23706700  | 0.65216500  |
| B  | -1.39252000 | 0.55752300  | 0.21984600  |
| B  | 0.14233300  | 2.49891900  | -0.21278900 |
| B  | -2.31011100 | 2.84108200  | -0.53718200 |
| B  | -3.76465300 | 1.06939400  | 0.33240400  |
| B  | -2.48340400 | -0.90397500 | 0.65269900  |
| B  | -1.40390500 | -3.19912600 | 0.38167200  |
| B  | 1.00793100  | -3.31340300 | -0.25057600 |
| B  | 2.36427900  | -1.19988500 | 0.00575700  |
| B  | 3.74442100  | 0.56358600  | 0.79040300  |
| B  | 2.51361100  | 2.59345800  | 0.65936800  |
| N  | 2.47219200  | 1.19680400  | 0.87573900  |
| N  | -0.00983000 | 1.02672300  | 0.03748800  |
| N  | 1.36871900  | 3.25021800  | 0.05525100  |
| N  | 3.70721000  | -0.79292100 | 0.31234900  |
| N  | 2.26069800  | -2.62113800 | -0.38131400 |
| N  | -0.09559500 | -2.64673600 | 0.35150300  |
| N  | -2.53461800 | -2.36763200 | 0.73630000  |
| N  | -3.78168000 | -0.27808600 | 0.80653500  |
| N  | -2.46068900 | 1.52544900  | -0.02283700 |
| N  | -0.97568000 | 3.32347100  | -0.70635800 |
| B  | 1.49685300  | 4.66013800  | -0.27411200 |
| B  | -0.82979000 | 4.70919000  | -1.11140000 |
| B  | -5.03579000 | -0.90773600 | 1.10501600  |

|   |             |             |             |
|---|-------------|-------------|-------------|
| B | -3.80717100 | -3.05312600 | 0.99765900  |
| B | 3.45156800  | -3.41116900 | -0.68691200 |
| B | 4.90693900  | -1.55651400 | 0.11947300  |
| N | 5.01751800  | 1.20854500  | 1.05863700  |
| N | 3.75811800  | 3.33950000  | 0.93977900  |
| N | -3.50531100 | 3.64277700  | -0.81642500 |
| N | -4.95823100 | 1.86454600  | 0.17552200  |
| N | -1.56477300 | -4.60009800 | -0.01534000 |
| N | 0.81561100  | -4.66397000 | -0.78730200 |
| B | 4.98666000  | 2.63967800  | 1.21993900  |
| B | -4.81481800 | 3.16391000  | -0.44345700 |
| B | -0.45706600 | -5.32153200 | -0.58436400 |
| B | 6.22714200  | 0.42848800  | 0.94554200  |
| B | -6.21268300 | 1.27182600  | 0.59397100  |
| N | 6.15107200  | -0.93184100 | 0.49671700  |
| N | -6.21827100 | -0.07554200 | 1.07600700  |
| N | -4.99877900 | -2.32149200 | 1.31913700  |
| N | 4.75579300  | -2.86590000 | -0.46028200 |
| N | 3.24815100  | -4.75419100 | -1.19703700 |
| N | -3.85491400 | -4.49253600 | 0.85922000  |
| B | 3.80545900  | 4.76198200  | 0.72488600  |
| B | -3.32455800 | 4.95462900  | -1.39679400 |
| B | 1.98144000  | -5.38862600 | -1.26646600 |
| B | -2.81521800 | -5.26361500 | 0.28078200  |
| N | -1.99726500 | 5.42851000  | -1.57204300 |
| N | 0.44475900  | 5.32712900  | -0.98239300 |
| N | 2.68040900  | 5.38135400  | 0.11992600  |
| H | 1.87425800  | -6.49877400 | -1.69249200 |

|   |             |             |             |
|---|-------------|-------------|-------------|
| H | -0.59152900 | -6.46210800 | -0.90864200 |
| H | -2.96700800 | -6.42508600 | 0.05056600  |
| H | 5.97772400  | 3.24140600  | 1.50556600  |
| H | 7.29208100  | 0.90961300  | 1.19721200  |
| H | 4.77101300  | 5.40477500  | 1.01174100  |
| H | -4.26035600 | 5.63021700  | -1.70399900 |
| H | -5.77868700 | 3.83903300  | -0.64326700 |
| H | -7.23400400 | 1.88708000  | 0.52472800  |
| H | 7.02144000  | -1.43739000 | 0.40629600  |
| H | 5.56955900  | -3.43412400 | -0.65238300 |
| H | 4.05378300  | -5.29613700 | -1.47907200 |
| H | -4.72714800 | -4.96388500 | 1.05647600  |
| H | -5.85440100 | -2.83537400 | 1.47971600  |
| H | -7.11519000 | -0.47093800 | 1.32260700  |
| H | -1.87977800 | 6.37102200  | -1.91732400 |
| H | 0.55178500  | 6.30530900  | -1.21236900 |
| H | 2.72804100  | 6.37384400  | -0.06264000 |
| O | 0.73341900  | -0.34270700 | 1.91114100  |
| H | 0.09270500  | -1.81908600 | 0.93211700  |
| H | 1.45356600  | -0.55561700 | 2.51744100  |
| O | -0.27937800 | -2.53841400 | -3.05607500 |
| H | -1.17515000 | -2.77552900 | -3.32852800 |
| H | 0.09539700  | -3.35546000 | -2.68504700 |

H<sub>2</sub>O-Na<sup>+</sup>@V<sub>N2B</sub> *h*-BN-H<sub>2</sub>O

|    |             |             |             |
|----|-------------|-------------|-------------|
| Na | -0.34250100 | -1.17498700 | -0.27169300 |
| B  | -1.16441200 | 0.96119900  | -0.01683200 |
| B  | 1.51843000  | 0.16389700  | -0.03718800 |
| B  | 0.78833700  | 2.61472200  | 0.07303300  |

|   |             |             |             |
|---|-------------|-------------|-------------|
| B | 3.19988900  | 2.06835600  | -0.35634800 |
| B | 3.89238700  | -0.28857500 | -0.17569200 |
| B | 2.02273000  | -1.74863600 | 0.11558200  |
| B | 0.20118100  | -3.72729300 | -0.02139800 |
| B | -2.15309900 | -3.02640400 | -0.48184900 |
| B | -2.64703700 | -0.36797000 | -0.32456300 |
| B | -3.40749700 | 1.87834000  | 0.05295400  |
| B | -1.54617000 | 3.44554600  | 0.46267700  |
| N | -1.98990000 | 2.10416100  | 0.19274800  |
| N | 0.34607000  | 1.13724000  | 0.00463200  |
| N | -0.13945200 | 3.69126200  | 0.38573200  |
| N | -3.75870400 | 0.52771800  | -0.28068300 |
| N | -2.98523600 | -1.81744100 | -0.48728500 |
| N | -0.78426300 | -3.14180800 | -0.89792500 |
| N | 1.50586000  | -3.14129400 | 0.28231000  |
| N | 3.44250900  | -1.62227000 | 0.09042800  |
| N | 2.83257500  | 0.68827200  | -0.21277900 |
| N | 2.15945500  | 3.03378200  | -0.17506900 |
| B | 0.28654500  | 5.08719600  | 0.52669900  |
| B | 2.57440800  | 4.43925800  | -0.16210200 |
| B | 4.42302400  | -2.66844500 | 0.27855600  |
| B | 2.49533300  | -4.18699600 | 0.69539300  |
| B | -4.43661500 | -2.17214700 | -0.60717400 |
| B | -5.15751900 | 0.20162200  | -0.46502700 |
| N | -4.38726400 | 2.90762500  | 0.23818100  |
| N | -2.52443500 | 4.48229200  | 0.74027300  |
| N | 4.58554100  | 2.41828500  | -0.61677200 |
| N | 5.27354300  | 0.03557900  | -0.37193400 |



|   |             |             |             |
|---|-------------|-------------|-------------|
| N | -0.26682400 | -5.01515900 | 0.48044400  |
| N | -2.62379600 | -4.35271000 | -0.08148300 |
| B | -3.93718500 | 4.22372400  | 0.63058000  |
| B | 5.61972200  | 1.41311800  | -0.64030500 |
| B | -1.67375800 | -5.33825600 | 0.38731900  |
| B | -5.78688900 | 2.58915700  | 0.01926800  |
| B | 6.25822400  | -1.02570300 | -0.24934000 |
| N | -6.12547500 | 1.25439200  | -0.35181000 |
| N | 5.80645100  | -2.33736300 | 0.09043400  |
| N | 3.89920300  | -3.93435500 | 0.66459400  |
| N | -5.44482200 | -1.16879500 | -0.70577800 |
| N | -4.85261300 | -3.55261700 | -0.60216200 |
| N | 2.03306400  | -5.48714600 | 1.10914100  |
| B | -2.06527800 | 5.82687300  | 1.02948600  |
| B | 4.94349400  | 3.81690600  | -0.74774600 |
| B | -4.03354600 | -4.64131100 | -0.22378000 |
| B | 0.69160600  | -5.93145200 | 1.05870900  |
| N | 3.92409000  | 4.77540300  | -0.52107800 |
| N | 1.63330200  | 5.42920500  | 0.23027800  |
| N | -0.67458300 | 6.07655200  | 0.92842500  |
| H | -4.46901500 | -5.73124900 | -0.03256700 |
| H | -2.06319800 | -6.40057900 | 0.75177100  |
| H | 0.36222800  | -7.00171500 | 1.45966400  |
| H | -4.72740200 | 5.08671900  | 0.84311700  |
| H | -6.62911200 | 3.41994100  | 0.14662700  |
| H | -2.83095000 | 6.69077200  | 1.31864400  |
| H | 6.05574000  | 4.14703600  | -1.01269000 |
| H | 6.75000100  | 1.71571800  | -0.85341400 |

|   |             |             |             |
|---|-------------|-------------|-------------|
| H | 7.41592800  | -0.80467200 | -0.41377100 |
| H | -7.10532900 | 1.04770100  | -0.49182200 |
| H | -6.40557800 | -1.46978200 | -0.80108100 |
| H | -5.84124700 | -3.73710700 | -0.71026500 |
| H | 2.72457400  | -6.14028000 | 1.45312000  |
| H | 4.52563000  | -4.69841900 | 0.88033600  |
| H | 6.51100300  | -3.05542300 | 0.19265800  |
| H | 4.18262100  | 5.75169700  | -0.56823800 |
| H | 1.92248400  | 6.39639300  | 0.28183500  |
| H | -0.35719600 | 7.02372700  | 1.08439300  |
| O | 0.10175300  | -1.06375700 | -2.59078600 |
| H | -0.15832300 | -1.93702900 | -2.91642200 |
| H | -0.03732500 | -0.44300300 | -3.31674700 |
| O | -0.75209800 | -1.72405600 | 2.02368700  |
| H | -1.50527700 | -1.51491500 | 2.59066900  |
| H | -0.07158900 | -2.08746700 | 2.60498400  |

H<sub>2</sub>O-Na<sup>+</sup>@V<sub>N2B</sub> *h*-BN-H<sub>2</sub>O (reactant)

|    |             |             |             |
|----|-------------|-------------|-------------|
| Na | -0.00140600 | -0.55926400 | -2.16323900 |
| B  | 1.36814500  | 0.29324200  | 0.17705600  |
| B  | -1.29335400 | 0.42355900  | 0.19679400  |
| B  | 0.14248600  | 2.47283300  | -0.37911000 |
| B  | -2.26368000 | 2.81329600  | 0.12300300  |
| B  | -3.55866400 | 0.87432300  | 0.89432300  |
| B  | -2.35455200 | -1.08187400 | 0.31477100  |
| B  | -1.36581900 | -3.19424700 | -0.70563500 |
| B  | 1.07228400  | -3.33473300 | -0.58339600 |
| B  | 2.24395700  | -1.31358500 | 0.42167400  |
| B  | 3.68064700  | 0.52212100  | 0.82284600  |

|   |             |             |             |
|---|-------------|-------------|-------------|
| B | 2.59838500  | 2.54898300  | -0.05459400 |
| N | 2.49570500  | 1.18029100  | 0.34068000  |
| N | 0.06701600  | 0.96185500  | -0.14547600 |
| N | 1.40362700  | 3.17043900  | -0.54343000 |
| N | 3.50754400  | -0.88743900 | 0.96976400  |
| N | 2.18207100  | -2.73612500 | 0.09756800  |
| N | -0.09097700 | -2.56348900 | -0.97666500 |
| N | -2.44973800 | -2.48080900 | -0.09578600 |
| N | -3.56518500 | -0.55415300 | 0.89492300  |
| N | -2.30258700 | 1.42549200  | 0.46272900  |
| N | -1.03820400 | 3.31264000  | -0.42719200 |
| B | 1.48176600  | 4.57419400  | -0.93866900 |
| B | -0.98566200 | 4.72020400  | -0.81383400 |
| B | -4.80843500 | -1.24757200 | 1.12333700  |
| B | -3.71305900 | -3.23152500 | 0.10474500  |
| B | 3.33589600  | -3.61635900 | 0.40446800  |
| B | 4.65369500  | -1.70408100 | 1.28066200  |
| N | 4.92847600  | 1.19521600  | 1.03629700  |
| N | 3.87446600  | 3.23717300  | 0.04499600  |
| N | -3.44511400 | 3.63924200  | 0.31383900  |
| N | -4.71606800 | 1.67012300  | 1.18566400  |
| N | -1.45463300 | -4.58803200 | -1.11120700 |
| N | 1.02804100  | -4.74038600 | -0.95595500 |
| B | 5.02694100  | 2.57954500  | 0.62720800  |
| B | -4.65251100 | 3.08502900  | 0.88984600  |
| B | -0.23816200 | -5.34500400 | -1.30015700 |
| B | 6.04199700  | 0.39315100  | 1.52278500  |
| B | -5.92422300 | 0.96902400  | 1.59411900  |

|   |             |             |             |
|---|-------------|-------------|-------------|
| N | 5.86306500  | -1.01913900 | 1.66386600  |
| N | -5.92518500 | -0.46148900 | 1.58425900  |
| N | -4.82095000 | -2.63606200 | 0.78599600  |
| N | 4.48829200  | -3.11002000 | 1.08477200  |
| N | 3.28934900  | -4.98379100 | -0.04350400 |
| N | -3.80865800 | -4.56322500 | -0.43409100 |
| B | 3.96076300  | 4.59353800  | -0.45855100 |
| B | -3.40130900 | 5.01551800  | -0.13897000 |
| B | 2.19568100  | -5.56976200 | -0.72668700 |
| B | -2.73485200 | -5.26502500 | -1.03620200 |
| N | -2.19524300 | 5.49276100  | -0.72561200 |
| N | 0.26816500  | 5.27492400  | -1.21705100 |
| N | 2.77842400  | 5.19523700  | -0.97698500 |
| H | 2.21554300  | -6.70790100 | -1.07442300 |
| H | -0.28764600 | -6.48314100 | -1.64069700 |
| H | -2.86399500 | -6.37908000 | -1.43465600 |
| H | 6.05381600  | 3.16936400  | 0.74683100  |
| H | 7.09177100  | 0.89736400  | 1.77216100  |
| H | 4.98961100  | 5.19288900  | -0.43787600 |
| H | -4.34854700 | 5.72878000  | -0.02857000 |
| H | -5.59651600 | 3.78240800  | 1.08743200  |
| H | -6.90402100 | 1.57210000  | 1.90174200  |
| H | 6.67323900  | -1.55324700 | 1.94860400  |
| H | 5.25912300  | -3.74116600 | 1.25918700  |
| H | 4.09205000  | -5.57316100 | 0.13356300  |
| H | -4.68994100 | -5.05243200 | -0.34994800 |
| H | -5.66789600 | -3.17810200 | 0.89451000  |
| H | -6.79810600 | -0.91732600 | 1.81451600  |

|   |             |             |             |
|---|-------------|-------------|-------------|
| H | -2.17571900 | 6.46281300  | -1.01034700 |
| H | 0.31364600  | 6.25522100  | -1.46142700 |
| H | 2.84985000  | 6.15586200  | -1.28451000 |
| O | -0.35269200 | -0.23245400 | 2.76757600  |
| H | -0.71070800 | -0.92215400 | 3.34167200  |
| H | -0.49587600 | 0.58806500  | 3.25738900  |
| O | -0.11725800 | 0.04954000  | -4.31534000 |
| H | 0.58211100  | 0.44747100  | -4.85002100 |
| H | -0.88044600 | -0.02199900 | -4.90334100 |

H<sub>2</sub>O-K@V<sub>N<sub>2</sub>B</sub> *h*-BN-H<sub>2</sub>O

|   |             |             |             |
|---|-------------|-------------|-------------|
| K | -0.00494000 | -1.29561300 | -0.29407100 |
| B | -1.43755800 | 0.68814700  | -0.05438800 |
| B | 1.44032800  | 0.67919400  | -0.05546300 |
| B | 0.00946500  | 2.80481900  | 0.18678000  |
| B | 2.53347500  | 2.97344800  | 0.09236100  |
| B | 3.84378500  | 0.88960000  | -0.24012200 |
| B | 2.48938600  | -1.09743000 | -0.22017400 |
| B | 1.15497800  | -3.63261900 | -0.25872100 |
| B | -1.18578200 | -3.62563100 | -0.25542100 |
| B | -2.49932500 | -1.08102400 | -0.21259400 |
| B | -3.83845200 | 0.91567700  | -0.24145900 |
| B | -2.51282400 | 2.99142800  | 0.08217000  |
| N | -2.55632000 | 1.56972800  | -0.07228900 |
| N | 0.00450700  | 1.29030200  | 0.02885700  |
| N | -1.22368900 | 3.59945100  | 0.25941000  |
| N | -3.81079000 | -0.51126200 | -0.30789600 |
| N | -2.36117200 | -2.57291500 | -0.19542900 |
| N | -0.01543900 | -3.49484400 | -1.02249700 |

|   |             |             |             |
|---|-------------|-------------|-------------|
| N | 2.34139000  | -2.58862100 | -0.20772000 |
| N | 3.80537400  | -0.53709200 | -0.31713500 |
| N | 2.56676000  | 1.55205600  | -0.06975700 |
| N | 1.24864200  | 3.59025800  | 0.26660500  |
| B | -1.21969000 | 5.04324400  | 0.47624500  |
| B | 1.25422000  | 5.03377000  | 0.48572100  |
| B | 5.03064100  | -1.28790800 | -0.43448800 |
| B | 3.62550200  | -3.31366400 | -0.04384100 |
| B | -3.65062700 | -3.28885100 | -0.03216000 |
| B | -5.04098100 | -1.25359800 | -0.42637300 |
| N | -5.07359500 | 1.65506500  | -0.32249300 |
| N | -3.76214300 | 3.74499200  | 0.06005400  |
| N | 3.78893400  | 3.71730900  | 0.07849000  |
| N | 5.08499100  | 1.61961400  | -0.31372000 |
| N | 1.23150400  | -4.75595000 | 0.71135900  |
| N | -1.26630100 | -4.75147600 | 0.71153400  |
| B | -5.02649400 | 3.08524000  | -0.16388800 |
| B | 5.04855700  | 3.04941100  | -0.14525400 |
| B | -0.01912600 | -5.38093100 | 1.07963600  |
| B | -6.31088000 | 0.91888900  | -0.51793100 |
| B | 6.31706500  | 0.87547700  | -0.50998100 |
| N | -6.26469500 | -0.50288100 | -0.57978700 |
| N | 6.26019000  | -0.54570000 | -0.58178800 |
| N | 4.89888400  | -2.69709500 | -0.33082300 |
| N | -4.91967800 | -2.66304600 | -0.31565500 |
| N | -3.67868000 | -4.64576400 | 0.46333900  |
| N | 3.64435400  | -4.66948500 | 0.45357300  |
| B | -3.72894900 | 5.17078900  | 0.28289100  |

|   |             |             |             |
|---|-------------|-------------|-------------|
| B | 3.76563800  | 5.14255100  | 0.30792700  |
| B | -2.54671300 | -5.33251600 | 0.98619500  |
| B | 2.50823300  | -5.34545500 | 0.98302200  |
| N | 2.50413100  | 5.74789600  | 0.52740600  |
| N | 0.01944600  | 5.72046300  | 0.64145100  |
| N | -2.46384100 | 5.76736600  | 0.50721100  |
| H | -2.67065800 | -6.35102000 | 1.59868300  |
| H | -0.02051600 | -6.38297400 | 1.73105300  |
| H | 2.62730600  | -6.36293600 | 1.59809000  |
| H | -6.03110000 | 3.72555700  | -0.20704800 |
| H | -7.35007200 | 1.49744200  | -0.61441700 |
| H | -4.72665100 | 5.82415900  | 0.28258500  |
| H | 4.76858700  | 5.78779200  | 0.31589400  |
| H | 6.05851900  | 3.68168300  | -0.18120900 |
| H | 7.36105500  | 1.44636100  | -0.59965400 |
| H | -7.14079100 | -0.99316300 | -0.69588500 |
| H | -5.74896600 | -3.23975500 | -0.27428300 |
| H | -4.58582100 | -5.06626800 | 0.61181300  |
| H | 4.54847800  | -5.09648500 | 0.60202700  |
| H | 5.72436600  | -3.27907200 | -0.28598300 |
| H | 7.13324000  | -1.04185700 | -0.69595600 |
| H | 2.48144700  | 6.74586200  | 0.68480600  |
| H | 0.02267400  | 6.72071800  | 0.78408700  |
| H | -2.43442000 | 6.76567700  | 0.66121800  |
| O | -0.04161300 | -1.58055200 | -2.99331000 |
| H | -0.02731200 | -2.43178600 | -2.46790400 |
| H | 0.52202600  | -1.73258700 | -3.76012300 |
| O | -0.01008200 | -2.23347300 | 2.42466900  |

|   |             |             |            |
|---|-------------|-------------|------------|
| H | -0.78039800 | -2.81936900 | 2.39406700 |
| H | 0.73772600  | -2.84801300 | 2.39507100 |

H<sub>2</sub>O-K@V<sub>N2B</sub> *h*-BN-H<sub>2</sub>O (reactant)

|   |             |             |             |
|---|-------------|-------------|-------------|
| K | 0.14352200  | 0.78312600  | -2.07621600 |
| B | -1.36511600 | -0.63201700 | 0.26393300  |
| B | 1.28589200  | -0.23332500 | 0.69670300  |
| B | 0.21707100  | -2.53811700 | -0.13132300 |
| B | 2.59022000  | -2.55988700 | 0.73703700  |
| B | 3.76456300  | -0.49352500 | 0.80166300  |
| B | 2.31563200  | 1.22461600  | 0.03998900  |
| B | 0.89948200  | 3.30419000  | -0.16079000 |
| B | -1.48674900 | 3.11826700  | 0.53143500  |
| B | -2.50035700 | 0.78610100  | 0.72598400  |
| B | -3.72997300 | -1.20261500 | 0.30866000  |
| B | -2.21681400 | -2.93071700 | -0.54149100 |
| N | -2.40970700 | -1.61643100 | -0.03866100 |
| N | 0.02547600  | -1.07404600 | 0.10606600  |
| N | -0.86870000 | -3.39176800 | -0.65509600 |
| N | -3.78766300 | 0.12496900  | 0.83160300  |
| N | -2.59230200 | 2.24461100  | 0.86750300  |
| N | -0.17502900 | 2.59361600  | 0.43001300  |
| N | 2.16732100  | 2.64673500  | -0.34500100 |
| N | 3.68027300  | 0.85865100  | 0.31341600  |
| N | 2.51473700  | -1.16106400 | 0.91291200  |
| N | 1.45682900  | -3.26084300 | 0.16037000  |
| B | -0.68420500 | -4.77982500 | -1.03500600 |
| B | 1.61981900  | -4.67283900 | -0.13648400 |
| B | 4.85419700  | 1.65536000  | 0.10396400  |



|   |             |             |             |
|---|-------------|-------------|-------------|
| B | 3.33090100  | 3.47985100  | -0.63887000 |
| B | -3.87864000 | 2.88511400  | 1.16584300  |
| B | -5.05899700 | 0.71029200  | 1.14483000  |
| N | -4.90232600 | -2.02133800 | 0.10935500  |
| N | -3.38628300 | -3.75643600 | -0.86193700 |
| N | 3.85792100  | -3.26688600 | 1.01980000  |
| N | 5.06088300  | -1.09967200 | 1.05633500  |
| N | 0.67224600  | 4.68514200  | -0.61261700 |
| N | -1.68269900 | 4.54005600  | 0.22759000  |
| B | -4.71578400 | -3.30759600 | -0.52401600 |
| B | 5.07166800  | -2.52649900 | 1.25548900  |
| B | -0.60157000 | 5.31095000  | -0.32358400 |
| B | -6.17683200 | -1.47303200 | 0.52747300  |
| B | 6.24544500  | -0.28767300 | 0.91486000  |
| N | -6.22219000 | -0.14578900 | 1.05944500  |
| N | 6.12323100  | 1.06594900  | 0.45564100  |
| N | 4.65526700  | 2.96531000  | -0.45983200 |
| N | -5.05690100 | 2.11075500  | 1.43444100  |
| N | -3.95826100 | 4.32972200  | 1.11897700  |
| N | 3.08842900  | 4.83948800  | -1.08703200 |
| B | -3.16048600 | -5.06940600 | -1.42271600 |
| B | 3.93427200  | -4.69420300 | 0.85362200  |
| B | -2.93953900 | 5.15828100  | 0.58461700  |
| B | 1.81209900  | 5.45681200  | -1.07888600 |
| N | 2.81656600  | -5.35838100 | 0.28237500  |
| N | 0.59278800  | -5.37683700 | -0.84678300 |
| N | -1.81962600 | -5.52293100 | -1.53807200 |
| H | -3.11634600 | 6.32972600  | 0.43445300  |

|   |             |             |             |
|---|-------------|-------------|-------------|
| H | -0.75793700 | 6.46870800  | -0.57021900 |
| H | 1.67594700  | 6.58866100  | -1.43524700 |
| H | -5.65950200 | -3.99970400 | -0.75968600 |
| H | -7.18187200 | -2.10956400 | 0.41944300  |
| H | -4.07155900 | -5.76354000 | -1.76204000 |
| H | 4.91701400  | -5.30625400 | 1.15018200  |
| H | 6.08428400  | -3.09350100 | 1.53787100  |
| H | 7.32818400  | -0.73555000 | 1.15281500  |
| H | -7.13138000 | 0.21809900  | 1.30952400  |
| H | -5.92464000 | 2.59576100  | 1.61794100  |
| H | -4.83824800 | 4.76861100  | 1.35316900  |
| H | 3.87770500  | 5.41139600  | -1.35587200 |
| H | 5.44746200  | 3.56560200  | -0.64465300 |
| H | 6.97674400  | 1.59663300  | 0.34989900  |
| H | 2.88587400  | -6.35447900 | 0.12875600  |
| H | 0.72372200  | -6.35653300 | -1.05699200 |
| H | -1.67267700 | -6.46733700 | -1.86651900 |
| O | 0.73151000  | 0.31473600  | 1.96820900  |
| H | 0.03695100  | 1.73272000  | 0.94869100  |
| H | 1.44791400  | 0.61914800  | 2.53904400  |
| O | -0.52690700 | 3.17439000  | -3.10542500 |
| H | -1.39435400 | 3.54735800  | -3.30650900 |
| H | -0.09998100 | 3.84074600  | -2.53856500 |

H<sub>2</sub>O-Li@V<sub>B</sub> *h*-BN-H<sub>2</sub>O

|   |             |             |             |
|---|-------------|-------------|-------------|
| B | -1.19377600 | -1.01242300 | -0.34997900 |
| B | -0.47209700 | 1.40194900  | -0.02691600 |
| B | -2.91567100 | 0.77111000  | -0.09848900 |

|   |             |             |             |
|---|-------------|-------------|-------------|
| B | -2.24794100 | 3.19142100  | -0.07037100 |
| B | 0.18804900  | 3.83292500  | 0.01249100  |
| B | 1.98693700  | 2.05595900  | 0.17902500  |
| B | 3.89019100  | 0.33660800  | 0.35047400  |
| B | 3.20000900  | -2.06932800 | 0.22425700  |
| B | 0.62152600  | -2.72571200 | -0.24035900 |
| B | -1.79869600 | -3.41249100 | -0.08861900 |
| B | -3.59406800 | -1.65291600 | -0.04621600 |
| N | -2.21193300 | -2.03222900 | -0.16425900 |
| N | -1.51790700 | 0.39425500  | -0.17665200 |
| N | -3.94815500 | -0.25085100 | -0.05922600 |
| N | -0.38430300 | -3.76658000 | -0.10827300 |
| N | 0.10084200  | -1.45961000 | -0.70791600 |
| N | 2.06922300  | -3.00383900 | -0.02679100 |
| N | 3.07793500  | -0.74554300 | 0.74734600  |
| N | 0.89497700  | 1.13563500  | 0.26585000  |
| N | 3.41034500  | 1.70660800  | 0.21359600  |
| N | 1.59206000  | 3.46872300  | 0.09498400  |
| N | -0.84804400 | 2.82004800  | -0.04633400 |
| N | -3.27758400 | 2.17330300  | -0.06638900 |
| B | -5.34626500 | 0.12913700  | 0.01082700  |
| B | -4.67922400 | 2.55426200  | -0.03843100 |
| B | 2.61132800  | 4.50422600  | 0.06599100  |
| B | 4.41214500  | 2.74976000  | 0.08699400  |
| B | 2.43975600  | -4.42140600 | -0.04180800 |
| B | 0.01753300  | -5.15599400 | -0.03895000 |
| N | -2.81078200 | -4.44853800 | 0.03930000  |
| N | -4.60749500 | -2.69218300 | 0.06526000  |

|   |             |             |             |
|---|-------------|-------------|-------------|
| N | -2.61461000 | 4.60098900  | -0.07637700 |
| N | -0.19597900 | 5.23971000  | -0.03047500 |
| N | 5.29598900  | -0.02498300 | 0.09263100  |
| N | 4.59941600  | -2.45718500 | 0.00127900  |
| B | -4.20843500 | -4.07807600 | 0.10191600  |
| B | -1.58774300 | 5.61040100  | -0.07138100 |
| B | 5.62206900  | -1.42420900 | -0.04653100 |
| B | -2.40261400 | -5.83709200 | 0.10099400  |
| B | 0.82228700  | 6.26831800  | -0.01829400 |
| N | -1.01395500 | -6.15524400 | 0.05030800  |
| N | 2.18728300  | 5.87988300  | 0.02185000  |
| N | 3.98989100  | 4.11970200  | 0.05463400  |
| N | 1.42195600  | -5.43687400 | -0.07033500 |
| N | 3.83550400  | -4.78969400 | -0.04332800 |
| N | 5.80599200  | 2.37888900  | -0.00413300 |
| B | -6.00165200 | -2.30528700 | 0.12872100  |
| B | -4.01193100 | 4.97870900  | -0.07030800 |
| B | 4.91332600  | -3.86369500 | -0.08856300 |
| B | 6.26538400  | 1.03533900  | -0.06163900 |
| N | -5.00087600 | 3.95756000  | -0.04647000 |
| N | -5.67777500 | 1.52413600  | -0.00052800 |
| N | -6.33141500 | -0.92111700 | 0.09035000  |
| H | 6.04118000  | -4.24027900 | -0.18885200 |
| H | 6.75301200  | -1.74630000 | -0.24969600 |
| H | 7.42203600  | 0.78976400  | -0.23001300 |
| H | -5.03838000 | -4.93015200 | 0.18747200  |
| H | -3.21407700 | -6.70717000 | 0.19056600  |
| H | -6.86130900 | -3.12910700 | 0.21079800  |

|    |             |             |             |
|----|-------------|-------------|-------------|
| H  | -4.33207900 | 6.12830700  | -0.08152000 |
| H  | -1.89209300 | 6.76310900  | -0.09364100 |
| H  | 0.52265100  | 7.42310900  | -0.04438700 |
| H  | -0.75904700 | -7.13178200 | 0.10435900  |
| H  | 1.72258000  | -6.40250300 | -0.06653600 |
| H  | 4.07067900  | -5.77240000 | -0.07124400 |
| H  | 6.49623200  | 3.11046300  | -0.10295800 |
| H  | 4.69334200  | 4.84149000  | -0.02441900 |
| H  | 2.88408000  | 6.61180400  | 0.01809000  |
| H  | -5.96950400 | 4.24534700  | -0.03577500 |
| H  | -6.65122600 | 1.79456600  | 0.03718400  |
| H  | -7.31074300 | -0.67622500 | 0.13926200  |
| Li | 1.48599800  | -0.70704300 | 0.03522700  |
| O  | 0.76855100  | -0.96414100 | 2.48265700  |
| H  | 1.73758800  | -0.97206200 | 2.41198600  |
| H  | 0.56015500  | -0.07485900 | 2.15357500  |
| O  | 2.14904600  | -0.48575500 | -2.40898300 |
| H  | 2.53771900  | -1.22808300 | -2.88869700 |
| H  | 1.25211100  | -0.78898200 | -2.16412200 |

H<sub>2</sub>O-Li@V<sub>B</sub> *h*-BN-H<sub>2</sub>O (reactant)

|   |             |             |             |
|---|-------------|-------------|-------------|
| B | 1.39005000  | -0.73809500 | -0.34015800 |
| B | 0.08042800  | 1.37952600  | -0.09274700 |
| B | 2.61413000  | 1.41934400  | -0.06001600 |
| B | 1.35242900  | 3.57368700  | 0.00655000  |
| B | -1.15604800 | 3.59327800  | 0.06824700  |
| B | -2.47360100 | 1.42847400  | 0.02434900  |
| B | -3.84780500 | -0.64010600 | -0.14105700 |
| B | -2.52144300 | -2.73550800 | -0.18332600 |

|   |             |             |             |
|---|-------------|-------------|-------------|
| B | 0.05195200  | -2.78910400 | -0.27971000 |
| B | 2.57028500  | -2.89471000 | -0.02168000 |
| B | 3.87767600  | -0.75187600 | -0.00702100 |
| N | 2.63435800  | -1.45758000 | -0.13495600 |
| N | 1.36028600  | 0.70794800  | -0.17308000 |
| N | 3.87208500  | 0.69463900  | -0.01706700 |
| N | 1.28620100  | -3.56012500 | -0.03447800 |
| N | 0.20729500  | -1.42165800 | -0.67540500 |
| N | -1.25120200 | -3.45991500 | -0.20006800 |
| N | -2.68268700 | -1.34396800 | -0.51686000 |
| N | -1.21344600 | 0.72889300  | -0.04734000 |
| N | -3.77391100 | 0.79413800  | 0.03700100  |
| N | -2.42221300 | 2.89583100  | 0.09293300  |
| N | 0.08650600  | 2.85267700  | -0.02484800 |
| N | 2.61140100  | 2.86469200  | -0.00297700 |
| B | 5.12870300  | 1.41095000  | 0.07391600  |
| B | 3.87126600  | 3.58628500  | 0.05327200  |
| B | -3.65865000 | 3.65434500  | 0.23771900  |
| B | -4.99824200 | 1.54174000  | 0.22955400  |
| B | -1.26938200 | -4.90178200 | 0.03812500  |
| B | 1.24289000  | -4.99563900 | 0.12592300  |
| N | 3.81176500  | -3.64223500 | 0.14840900  |
| N | 5.11887200  | -1.50069000 | 0.12795200  |
| N | 1.35963100  | 5.03115000  | 0.05819800  |
| N | -1.12886600 | 5.05204500  | 0.13343800  |
| N | -5.11124000 | -1.34738800 | 0.05295600  |
| N | -3.78606200 | -3.47150000 | 0.05838900  |
| B | 5.07238700  | -2.94235000 | 0.19858500  |

|   |             |             |            |
|---|-------------|-------------|------------|
| B | 0.12202000  | 5.75848800  | 0.11425700 |
| B | -5.05011300 | -2.78281800 | 0.13914900 |
| B | 3.75533400  | -5.08219100 | 0.28563900 |
| B | -2.35890900 | 5.80271000  | 0.24563500 |
| N | 2.48416900  | -5.71764200 | 0.27059600 |
| N | -3.58300900 | 5.09096200  | 0.29987900 |
| N | -4.91055900 | 2.96709700  | 0.31582400 |
| N | -0.03774700 | -5.63068400 | 0.13254700 |
| N | -2.53011400 | -5.58217300 | 0.16130100 |
| N | -6.24417300 | 0.82201900  | 0.30828000 |
| B | 6.37046300  | -0.78052300 | 0.20155600 |
| B | 2.61285500  | 5.75482100  | 0.08690400 |
| B | -3.77684000 | -4.90840600 | 0.18932500 |
| B | -6.32599500 | -0.59900300 | 0.26079900 |
| N | 3.83022700  | 5.02449300  | 0.08134900 |
| N | 5.09818400  | 2.84465200  | 0.08033100 |
| N | 6.34571100  | 0.64306300  | 0.15751900 |
| H | -4.79294100 | -5.52083500 | 0.32251300 |
| H | -6.05391800 | -3.40459300 | 0.31161600 |
| H | -7.37655700 | -1.15180600 | 0.39099400 |
| H | 6.08766900  | -3.55943600 | 0.30865300 |
| H | 4.75353700  | -5.72497200 | 0.41207000 |
| H | 7.40843700  | -1.36249800 | 0.29774200 |
| H | 2.62446600  | 6.94781600  | 0.11793000 |
| H | 0.13306900  | 6.95017900  | 0.15184500 |
| H | -2.34612800 | 6.99496800  | 0.29490000 |
| H | 2.46185400  | -6.72288100 | 0.37226700 |
| H | -0.08703600 | -6.63079300 | 0.27228700 |

|    |             |             |             |
|----|-------------|-------------|-------------|
| H  | -2.53484200 | -6.58486700 | 0.28639700  |
| H  | -7.10150500 | 1.33658700  | 0.45417100  |
| H  | -5.75591200 | 3.50757300  | 0.43717200  |
| H  | -4.43621100 | 5.62409500  | 0.39401400  |
| H  | 4.69379700  | 5.54818300  | 0.11207000  |
| H  | 5.97027800  | 3.35255100  | 0.13902000  |
| H  | 7.23160700  | 1.12563000  | 0.21746900  |
| Li | -1.26655400 | -0.65686400 | -1.65567800 |
| O  | -1.10151700 | -0.09813600 | -3.51156400 |
| H  | -1.58197200 | 0.65446500  | -3.87853100 |
| H  | -0.19289600 | -0.02557800 | -3.83116000 |
| O  | -1.07869400 | -1.19195000 | 2.40851400  |
| H  | -0.13285300 | -1.34042000 | 2.52693600  |
| H  | -1.13002100 | -0.68093500 | 1.58336300  |

H<sub>2</sub>O-Li<sup>+</sup>@V<sub>B</sub> *h*-BN-H<sub>2</sub>O

|   |             |             |             |
|---|-------------|-------------|-------------|
| B | -0.51167700 | 1.41998400  | -0.36185400 |
| B | 1.62916600  | -0.06801300 | -0.29934600 |
| B | 1.76060100  | 2.42767300  | -0.07751100 |
| B | 3.86830700  | 1.02938500  | -0.14170100 |
| B | 3.68879900  | -1.49591100 | -0.15614100 |
| B | 1.45219900  | -2.63577800 | -0.20020500 |
| B | -0.87328700 | -3.82600300 | -0.16435800 |
| B | -2.99942900 | -2.37301700 | -0.21514600 |
| B | -2.81983700 | 0.28675100  | -0.33974300 |
| B | -2.58843400 | 2.76623200  | 0.05671600  |
| B | -0.30688900 | 3.86659000  | 0.09951600  |
| N | -1.13467000 | 2.68595200  | -0.06492900 |
| N | 0.93581400  | 1.21639100  | -0.24430900 |



|   |             |             |             |
|---|-------------|-------------|-------------|
| N | 1.13094000  | 3.72518200  | 0.05527000  |
| N | -3.41084500 | 1.56327300  | -0.00892600 |
| N | -1.47662300 | 0.46991800  | -0.85333500 |
| N | -3.51127800 | -1.00204900 | -0.12393000 |
| N | -1.70760800 | -2.78974000 | -0.70053200 |
| N | 0.91449300  | -1.31826500 | -0.47087600 |
| N | 0.58559800  | -3.80613500 | -0.06152400 |
| N | 2.88531200  | -2.71780500 | -0.11464700 |
| N | 3.05940400  | -0.17608800 | -0.21198600 |
| N | 3.20563700  | 2.31306600  | -0.06885600 |
| B | 1.95258200  | 4.92655200  | 0.18020300  |
| B | 4.02881300  | 3.52017300  | 0.02482600  |
| B | 3.52860300  | -4.01511900 | 0.04612200  |
| B | 1.24107900  | -5.09610200 | 0.20418400  |
| B | -4.95606300 | -0.88253200 | 0.17102200  |
| B | -4.84601900 | 1.64409300  | 0.21568700  |
| N | -3.20318400 | 4.04844500  | 0.30242500  |
| N | -0.94577900 | 5.14783500  | 0.30815700  |
| N | 5.31046700  | 0.91453100  | -0.11627700 |
| N | 5.12669100  | -1.58803600 | -0.10041000 |
| N | -1.67813900 | -4.98372100 | 0.21193000  |
| N | -3.77600200 | -3.55541700 | 0.15509200  |
| B | -2.38270900 | 5.23886100  | 0.40180500  |
| B | 5.93539700  | -0.38323600 | -0.11046200 |
| B | -3.11645300 | -4.83802100 | 0.34114500  |
| B | -4.64753300 | 4.13787800  | 0.45074100  |
| B | 5.77081000  | -2.89062300 | -0.01603900 |
| N | -5.42140000 | 2.94270100  | 0.40624100  |

|   |             |             |             |
|---|-------------|-------------|-------------|
| N | 4.96001600  | -4.05909100 | 0.06114800  |
| N | 2.67340900  | -5.15526700 | 0.20952500  |
| N | -5.56357100 | 0.40749900  | 0.28407200  |
| N | -5.73192300 | -2.08344100 | 0.34747100  |
| N | 0.42066800  | -6.25499700 | 0.43397300  |
| B | -0.12107100 | 6.33820200  | 0.42417200  |
| B | 6.12093500  | 2.11893200  | -0.05966100 |
| B | -5.20261800 | -3.39726200 | 0.38267500  |
| B | -0.99867400 | -6.24015600 | 0.48267400  |
| N | 5.45731300  | 3.37320300  | 0.00326800  |
| N | 3.37548600  | 4.78642100  | 0.13883000  |
| N | 1.29010200  | 6.19076500  | 0.34364900  |
| H | -5.89092400 | -4.34057300 | 0.60931100  |
| H | -3.76806900 | -5.77849800 | 0.66359600  |
| H | -1.61945700 | -7.22108500 | 0.74293400  |
| H | -2.90010800 | 6.29646200  | 0.56975600  |
| H | -5.17323300 | 5.19211800  | 0.61838400  |
| H | -0.61625800 | 7.40874500  | 0.58323100  |
| H | 7.30920300  | 2.05392100  | -0.05808800 |
| H | 7.12093400  | -0.47308100 | -0.09869100 |
| H | 6.95709700  | -2.97694300 | 0.00021100  |
| H | -6.42010700 | 3.03468000  | 0.53522700  |
| H | -6.55921700 | 0.44079900  | 0.46050300  |
| H | -6.72365900 | -1.98705800 | 0.52226800  |
| H | 0.87382000  | -7.14096400 | 0.61551300  |
| H | 3.10630100  | -6.05798200 | 0.35914300  |
| H | 5.43677000  | -4.94734400 | 0.13974300  |
| H | 6.03673000  | 4.20058300  | 0.05042400  |

|    |             |             |             |
|----|-------------|-------------|-------------|
| H  | 3.94570800  | 5.61832500  | 0.21563100  |
| H  | 1.84719200  | 7.03058000  | 0.42645700  |
| Li | -0.87929800 | -1.19376100 | -0.56841000 |
| O  | -0.97069700 | -1.11500800 | 1.67800600  |
| H  | -1.78948900 | -0.93892800 | 2.16063400  |
| H  | -0.25137800 | -0.87269000 | 2.27517300  |
| O  | -4.02127200 | 0.41555900  | -2.95077500 |
| H  | -4.29165500 | -0.31013000 | -3.52758000 |
| H  | -3.48186700 | 0.98237600  | -3.51658900 |

H<sub>2</sub>O-Li<sup>+</sup>@V<sub>B</sub> *h*-BN-H<sub>2</sub>O (reactant)

|   |             |             |             |
|---|-------------|-------------|-------------|
| B | -1.11453200 | 0.99597600  | -0.24383000 |
| B | -0.43266300 | -1.43924000 | -0.18272100 |
| B | -2.85192700 | -0.79417100 | -0.03031800 |
| B | -2.19457600 | -3.21816100 | -0.01651200 |
| B | 0.24144400  | -3.86230400 | 0.01093100  |
| B | 2.03566800  | -2.09804500 | -0.06858000 |
| B | 3.83388300  | -0.32433700 | -0.06126300 |
| B | 3.13886200  | 2.11931800  | -0.10293800 |
| B | 0.67567700  | 2.77045100  | -0.16995900 |
| B | -1.75359400 | 3.41041900  | -0.03953500 |
| B | -3.53014900 | 1.62554800  | -0.02046900 |
| N | -2.13202900 | 2.00979100  | -0.11938300 |
| N | -1.44113400 | -0.40791700 | -0.12637700 |
| N | -3.87679900 | 0.22463000  | 0.00156500  |
| N | -0.34767700 | 3.78214600  | -0.03345100 |
| N | 0.20433500  | 1.46910700  | -0.62361200 |
| N | 2.08135600  | 3.09946800  | -0.01775400 |
| N | 2.93652300  | 0.73148800  | -0.46956100 |

|   |             |             |             |
|---|-------------|-------------|-------------|
| N | 0.97288900  | -1.18923100 | -0.46953400 |
| N | 3.41632500  | -1.69599400 | 0.07843500  |
| N | 1.64560700  | -3.48368600 | 0.04534000  |
| N | -0.78821700 | -2.83729000 | -0.07794000 |
| N | -3.21038800 | -2.19305200 | 0.00090300  |
| B | -5.28380300 | -0.15845700 | 0.06863800  |
| B | -4.61768200 | -2.58036600 | 0.05709900  |
| B | 2.66892700  | -4.50897600 | 0.23572500  |
| B | 4.43886300  | -2.72196300 | 0.29760400  |
| B | 2.45004700  | 4.50647000  | 0.18445800  |
| B | 0.02444500  | 5.17991400  | 0.14329600  |
| N | -2.77833800 | 4.42338700  | 0.07535500  |
| N | -4.54800400 | 2.65322700  | 0.06022100  |
| N | -2.55177300 | -4.62103500 | 0.04104300  |
| N | -0.13444900 | -5.25458100 | 0.10297800  |
| N | 5.22322000  | 0.07164900  | 0.09951600  |
| N | 4.53988500  | 2.48884300  | 0.06560700  |
| B | -4.17447400 | 4.04372400  | 0.09847400  |
| B | -1.52968300 | -5.63296900 | 0.09069600  |
| B | 5.56721600  | 1.47419600  | 0.14541900  |
| B | -2.40439200 | 5.82113800  | 0.18767000  |
| B | 0.88672000  | -6.27794800 | 0.23065800  |
| N | -1.02153700 | 6.15671900  | 0.22343000  |
| N | 2.24996500  | -5.87737200 | 0.30049700  |
| N | 4.03302100  | -4.09009000 | 0.35871400  |
| N | 1.41843700  | 5.49340900  | 0.23991000  |
| N | 3.84277500  | 4.84171500  | 0.28990300  |
| N | 5.80978500  | -2.30403900 | 0.40528700  |

|    |             |             |             |
|----|-------------|-------------|-------------|
| B  | -5.94725800 | 2.26881400  | 0.11944300  |
| B  | -3.95217300 | -5.00463700 | 0.07922900  |
| B  | 4.89100500  | 3.88873500  | 0.23617600  |
| B  | 6.23195500  | -0.95203800 | 0.31980400  |
| N  | -4.93569300 | -3.98053100 | 0.07999500  |
| N  | -5.61051300 | -1.55083100 | 0.08772000  |
| N  | -6.27007700 | 0.88527800  | 0.11330300  |
| H  | 6.02942700  | 4.21885300  | 0.33979500  |
| H  | 6.70137100  | 1.79688500  | 0.29677300  |
| H  | 7.37884100  | -0.65575100 | 0.43310100  |
| H  | -5.01315700 | 4.88509200  | 0.16009100  |
| H  | -3.23582800 | 6.66976900  | 0.25809300  |
| H  | -6.80251900 | 3.09526700  | 0.17338200  |
| H  | -4.26588900 | -6.15254100 | 0.11270400  |
| H  | -1.82982100 | -6.78307500 | 0.13257300  |
| H  | 0.58984100  | -7.42903400 | 0.28473200  |
| H  | -0.78419600 | 7.13459400  | 0.32217600  |
| H  | 1.68798400  | 6.46050400  | 0.36401700  |
| H  | 4.10424200  | 5.81064400  | 0.41446100  |
| H  | 6.52458800  | -3.00303500 | 0.55747900  |
| H  | 4.74255300  | -4.79707400 | 0.49993700  |
| H  | 2.94267800  | -6.60554400 | 0.41087300  |
| H  | -5.90466000 | -4.26749800 | 0.11069300  |
| H  | -6.58443700 | -1.81962600 | 0.13290600  |
| H  | -7.24943800 | 0.63771500  | 0.15604100  |
| Li | 1.41375200  | 0.32898800  | -1.80748900 |
| O  | 1.44417400  | 0.34388700  | -3.71778600 |
| H  | 0.82197000  | 0.81596000  | -4.28524500 |

|   |             |             |             |
|---|-------------|-------------|-------------|
| H | 2.08905100  | -0.07442700 | -4.30174200 |
| O | 0.50025200  | 1.14727900  | 2.45163300  |
| H | 0.88668900  | 1.81837900  | 3.02868200  |
| H | -0.20742600 | 0.75572700  | 2.97942700  |

H<sub>2</sub>O-Na@V<sub>B</sub> h-BN-H<sub>2</sub>O

|   |             |             |             |
|---|-------------|-------------|-------------|
| B | 0.85549800  | 1.27572900  | -0.23747200 |
| B | 0.91240300  | -1.31464900 | 0.31227400  |
| B | 3.00332400  | 0.02354200  | -0.05939500 |
| B | 3.06901800  | -2.49968900 | -0.15883400 |
| B | 0.90644500  | -3.78527300 | 0.07571100  |
| B | -1.23431300 | -2.55980100 | 0.61640700  |
| B | -3.67533100 | -1.29053900 | 0.53453800  |
| B | -3.71551100 | 1.19445000  | 0.18284100  |
| B | -1.35053900 | 2.48453000  | -0.29880600 |
| B | 0.78522600  | 3.77223300  | -0.01057100 |
| B | 2.99310700  | 2.54884200  | 0.04110900  |
| N | 1.55397900  | 2.54095800  | -0.02517300 |
| N | 1.54738100  | -0.00116100 | 0.00543500  |
| N | 3.71404500  | 1.29582800  | -0.03807000 |
| N | -0.66683200 | 3.75819500  | -0.10403700 |
| N | -0.47231700 | 1.43917500  | -0.74279800 |
| N | -2.83270300 | 2.36789600  | -0.12411500 |
| N | -3.40008500 | 0.04359000  | 0.95218900  |
| N | -0.35850700 | -1.47418300 | 0.92096700  |
| N | -2.75245600 | -2.47662600 | 0.57943200  |
| N | -0.53673300 | -3.80612600 | 0.27696100  |
| N | 1.64842500  | -2.53854900 | 0.04370600  |
| N | 3.75306400  | -1.21979600 | -0.14154200 |

|   |             |             |             |
|---|-------------|-------------|-------------|
| B | 5.16642500  | 1.31638700  | -0.06316500 |
| B | 5.20053600  | -1.19240200 | -0.24836300 |
| B | -1.25200100 | -5.05276000 | 0.17683700  |
| B | -3.42241800 | -3.75808700 | 0.30194900  |
| B | -3.56084600 | 3.63106400  | -0.27865900 |
| B | -1.42851700 | 4.98603500  | -0.07516800 |
| N | 1.48589000  | 5.03754600  | 0.14211400  |
| N | 3.68739300  | 3.82345100  | 0.15210100  |
| N | 3.79616200  | -3.74724700 | -0.33518200 |
| N | 1.63701200  | -5.02610400 | -0.15119400 |
| N | -5.04879000 | -1.37322100 | -0.02905300 |
| N | -5.10636500 | 1.14911400  | -0.31165900 |
| B | 2.93053700  | 5.05118000  | 0.21644800  |
| B | 3.07001600  | -4.99631900 | -0.34066800 |
| B | -5.74623500 | -0.15298700 | -0.37552400 |
| B | 0.72156800  | 6.26963900  | 0.19064300  |
| B | 0.91218500  | -6.28130900 | -0.18471000 |
| N | -0.69921600 | 6.21778900  | 0.08363300  |
| N | -0.50179600 | -6.26713900 | -0.02199000 |
| N | -2.67943600 | -4.98883900 | 0.25926900  |
| N | -2.84999400 | 4.88325900  | -0.24112200 |
| N | -4.99194400 | 3.59404000  | -0.48602100 |
| N | -4.84965800 | -3.80417200 | 0.07820000  |
| B | 5.13585500  | 3.83191900  | 0.15476700  |
| B | 5.23602900  | -3.70766400 | -0.46710400 |
| B | -5.75865700 | 2.40113300  | -0.60885500 |
| B | -5.66277200 | -2.66963900 | -0.16860200 |
| N | 5.89423600  | -2.44557800 | -0.40850600 |

|    |             |             |             |
|----|-------------|-------------|-------------|
| N  | 5.87246000  | 0.07482300  | -0.18701700 |
| N  | 5.82781200  | 2.59429000  | 0.03672200  |
| H  | -6.90731200 | 2.43854100  | -0.93169600 |
| H  | -6.86536400 | -0.21900000 | -0.78541100 |
| H  | -6.80787600 | -2.78659100 | -0.48497800 |
| H  | 3.50333900  | 6.09161100  | 0.32308300  |
| H  | 1.27394100  | 7.32016300  | 0.31369300  |
| H  | 5.74070100  | 4.85652900  | 0.24670300  |
| H  | 5.86652000  | -4.71022000 | -0.61516500 |
| H  | 3.66318300  | -6.01887300 | -0.50013900 |
| H  | 1.48861400  | -7.31283400 | -0.35304400 |
| H  | -1.19910700 | 7.09544700  | 0.11987300  |
| H  | -3.39575700 | 5.73325800  | -0.29055400 |
| H  | -5.47092900 | 4.46848000  | -0.65357600 |
| H  | -5.27694400 | -4.71161300 | -0.04825200 |
| H  | -3.20751100 | -5.84290600 | 0.13733600  |
| H  | -0.98568900 | -7.15320400 | -0.06764700 |
| H  | 6.90123900  | -2.44386600 | -0.49447900 |
| H  | 6.88234400  | 0.09202300  | -0.23280100 |
| H  | 6.83798800  | 2.62688000  | 0.03241000  |
| Na | -1.51588800 | 0.05401600  | 0.27716000  |
| O  | -0.52194600 | 0.83178100  | 2.63254200  |
| H  | -0.42986300 | -0.10570500 | 2.36054000  |
| H  | 0.38626700  | 1.15909400  | 2.65690900  |
| O  | -2.01916100 | -0.41401300 | -2.19349600 |
| H  | -2.77752100 | -0.01080900 | -2.63452600 |
| H  | -1.36899200 | 0.31094700  | -2.08031400 |

H<sub>2</sub>O-Na@V<sub>B</sub> *h*-BN-H<sub>2</sub>O (reactant)



|   |             |             |             |
|---|-------------|-------------|-------------|
| B | 0.83791400  | -0.87784100 | 0.00892900  |
| B | -1.48491800 | -0.11418900 | 0.71351100  |
| B | -1.15904200 | -2.45875200 | -0.15039300 |
| B | -3.49395700 | -1.61083300 | 0.25374400  |
| B | -3.79785600 | 0.80366900  | 0.67019900  |
| B | -1.71230900 | 2.11109800  | 0.62663600  |
| B | 0.32558800  | 2.98037900  | -0.64155100 |
| B | 2.73296300  | 2.49205900  | -0.27468600 |
| B | 3.01005900  | 0.33253000  | 0.28335500  |
| B | 3.14991100  | -2.08745700 | 0.18838200  |
| B | 1.13446600  | -3.40130700 | -0.35725100 |
| N | 1.71705100  | -2.08957200 | -0.05974800 |
| N | -0.58562600 | -1.14270300 | 0.13540700  |
| N | -0.29050600 | -3.56835200 | -0.48347700 |
| N | 3.79295300  | -0.83928100 | 0.46869800  |
| N | 1.58362000  | 0.43940600  | 0.01405300  |
| N | 3.65769500  | 1.58993700  | 0.30345400  |
| N | 1.38464100  | 1.93464200  | -0.33095600 |
| N | -0.96409300 | 1.08287800  | 1.22658000  |
| N | -1.04215100 | 3.14577600  | -0.18658700 |
| N | -3.18173800 | 2.09519400  | 0.60790000  |
| N | -2.93528100 | -0.34789100 | 0.59619300  |
| N | -2.59432700 | -2.69004200 | -0.09475300 |
| B | -0.85812800 | -4.86640900 | -0.82086000 |
| B | -3.16294100 | -3.97631600 | -0.44298600 |
| B | -3.97065700 | 3.24291600  | 0.28112800  |
| B | -1.88110500 | 4.26084600  | -0.63436100 |
| B | 5.08064400  | 1.77425900  | 0.32958100  |

|   |             |             |             |
|---|-------------|-------------|-------------|
| B | 5.23476500  | -0.70649700 | 0.63864700  |
| N | 3.97767300  | -3.28179100 | 0.16272600  |
| N | 1.99229000  | -4.57745600 | -0.52565100 |
| N | -4.94530500 | -1.78875900 | 0.24773800  |
| N | -5.24723000 | 0.66377300  | 0.63403100  |
| N | 0.88368400  | 4.12708600  | -1.42254800 |
| N | 3.21986200  | 3.75260400  | -0.75640200 |
| B | 3.39537700  | -4.52848000 | -0.24030500 |
| B | -5.81082500 | -0.65215500 | 0.47259000  |
| B | 2.26486100  | 4.51116400  | -1.50571700 |
| B | 5.39022400  | -3.19973300 | 0.46469500  |
| B | -6.05476400 | 1.86541600  | 0.55638900  |
| N | 5.98215100  | -1.93015900 | 0.72746800  |
| N | -5.40812200 | 3.12700200  | 0.38812800  |
| N | -3.25120000 | 4.38544500  | -0.20507600 |
| N | 5.85071300  | 0.60333300  | 0.64411100  |
| N | 5.52989800  | 3.09009000  | -0.04941400 |
| N | -1.33414500 | 5.21676700  | -1.55366600 |
| B | 1.43406700  | -5.84832500 | -0.93888100 |
| B | -5.49174400 | -3.08848700 | -0.05891600 |
| B | 4.63494600  | 4.04810400  | -0.63476100 |
| B | 0.01121200  | 5.15718500  | -1.96459700 |
| N | -4.59281200 | -4.14292700 | -0.38699200 |
| N | -2.27684300 | -5.03154100 | -0.83031200 |
| N | 0.03435900  | -5.95560300 | -1.11258200 |
| H | 5.06280500  | 5.08730900  | -1.03653400 |
| H | 2.60999600  | 5.45505400  | -2.14370500 |
| H | 0.43982700  | 5.96866800  | -2.72577300 |

|    |             |             |             |
|----|-------------|-------------|-------------|
| H  | 4.06967100  | -5.50672300 | -0.33284900 |
| H  | 6.06236100  | -4.18553500 | 0.47957200  |
| H  | 2.14268900  | -6.79090300 | -1.12070000 |
| H  | -6.67015600 | -3.28214200 | -0.04846600 |
| H  | -6.99518400 | -0.80233800 | 0.47997000  |
| H  | -7.24761400 | 1.80167000  | 0.58625100  |
| H  | 6.97955400  | -1.90413600 | 0.88734600  |
| H  | 6.86004300  | 0.65429300  | 0.67629700  |
| H  | 6.51229400  | 3.32688900  | -0.03793700 |
| H  | -1.92120400 | 5.94614300  | -1.93254800 |
| H  | -3.76455700 | 5.19826300  | -0.51814700 |
| H  | -5.99556100 | 3.93710800  | 0.24755800  |
| H  | -4.99164400 | -5.04317600 | -0.61401000 |
| H  | -2.66078900 | -5.93564500 | -1.06822200 |
| H  | -0.34554800 | -6.85332300 | -1.37777800 |
| Na | 1.04945100  | 1.58549200  | 2.15854100  |
| O  | -0.36917700 | 1.34378800  | 3.88516800  |
| H  | -0.92697700 | 1.16900000  | 3.07619300  |
| H  | -0.57555500 | 0.64506600  | 4.51649900  |
| O  | -1.20930000 | 0.72731400  | -2.50244900 |
| H  | -1.95357400 | 1.22277200  | -2.13831400 |
| H  | -1.10124800 | -0.00674100 | -1.88125500 |

H<sub>2</sub>O-Na<sup>+</sup>@V<sub>B</sub> *h*-BN-H<sub>2</sub>O

|   |            |             |             |
|---|------------|-------------|-------------|
| B | 0.94351600 | 1.32174300  | 0.57380700  |
| B | 0.90644100 | -1.34814500 | 0.55516100  |
| B | 3.00986600 | -0.04123500 | 0.21872000  |
| B | 3.01739100 | -2.56429200 | 0.01255600  |
| B | 0.81307900 | -3.80623900 | -0.02092700 |

|   |             |             |             |
|---|-------------|-------------|-------------|
| B | -1.37025200 | -2.61681000 | 0.43624400  |
| B | -3.70955900 | -1.25975400 | 0.29316500  |
| B | -3.67502400 | 1.32431500  | 0.29281800  |
| B | -1.28945400 | 2.63784400  | 0.45582400  |
| B | 0.91371100  | 3.77394900  | -0.02029100 |
| B | 3.08365000  | 2.47792300  | 0.00917000  |
| N | 1.64147000  | 2.52152500  | 0.16198200  |
| N | 1.54569300  | -0.02020600 | 0.49525900  |
| N | 3.75007800  | 1.20036100  | 0.08603700  |
| N | -0.54856800 | 3.81123500  | 0.04132400  |
| N | -0.35509900 | 1.72396200  | 1.07767100  |
| N | -2.75802000 | 2.49041900  | 0.24766400  |
| N | -3.48301200 | 0.03167800  | 0.90212200  |
| N | -0.41209400 | -1.70521400 | 1.00178200  |
| N | -2.83407800 | -2.44779800 | 0.25149800  |
| N | -0.64869800 | -3.81041400 | 0.03633000  |
| N | 1.57435700  | -2.56984400 | 0.15275500  |
| N | 3.71616000  | -1.30204900 | 0.08736700  |
| B | 5.20696900  | 1.18021800  | -0.04759000 |
| B | 5.17337800  | -1.32050300 | -0.04288400 |
| B | -1.38785800 | -5.03188500 | -0.23807800 |
| B | -3.53281000 | -3.69473900 | -0.15682900 |
| B | -3.42928700 | 3.75511100  | -0.16500400 |
| B | -1.25785800 | 5.04667200  | -0.24827100 |
| N | 1.64513800  | 4.98224100  | -0.31748800 |
| N | 3.80297200  | 3.71211800  | -0.22490100 |
| N | 3.70646700  | -3.81689200 | -0.21233000 |
| N | 1.51786900  | -5.03446800 | -0.30542900 |

|   |             |             |             |
|---|-------------|-------------|-------------|
| N | -5.04147900 | -1.21733300 | -0.31299800 |
| N | -5.00355800 | 1.32017000  | -0.31963900 |
| B | 3.09215200  | 4.95397400  | -0.38373900 |
| B | 2.96422400  | -5.04211800 | -0.36647000 |
| B | -5.68366300 | 0.05843400  | -0.56560900 |
| B | 0.93512600  | 6.22872000  | -0.54195000 |
| B | 0.77851600  | -6.26617800 | -0.51893000 |
| N | -0.49003000 | 6.22480300  | -0.50921100 |
| N | -0.64578600 | -6.22957200 | -0.48785700 |
| N | -2.81437800 | -4.92718800 | -0.26414100 |
| N | -2.68565800 | 4.97216900  | -0.27262700 |
| N | -4.83475400 | 3.75184000  | -0.47175400 |
| N | -4.93948700 | -3.65594600 | -0.46023500 |
| B | 5.25289800  | 3.68474900  | -0.30657600 |
| B | 5.15617000  | -3.82666700 | -0.28946600 |
| B | -5.62563600 | 2.58931000  | -0.63987700 |
| B | -5.69730900 | -2.47258400 | -0.62904200 |
| N | 5.83750700  | -2.58672900 | -0.18106300 |
| N | 5.87795200  | -0.07888700 | -0.04544200 |
| N | 5.90279400  | 2.42908600  | -0.19306000 |
| H | -6.74526500 | 2.64326800  | -1.03661200 |
| H | -6.77293500 | 0.07526200  | -1.04046700 |
| H | -6.81938200 | -2.49519100 | -1.02261500 |
| H | 3.69075700  | 5.96243200  | -0.58030800 |
| H | 1.53022000  | 7.23533000  | -0.76020900 |
| H | 5.87342300  | 4.68731900  | -0.46821400 |
| H | 5.75244300  | -4.84494300 | -0.44413700 |
| H | 3.53954100  | -6.06557100 | -0.55549900 |

|    |             |             |             |
|----|-------------|-------------|-------------|
| H  | 1.35081200  | -7.28815500 | -0.72751000 |
| H  | -0.96010300 | 7.10192700  | -0.68853300 |
| H  | -3.20287700 | 5.80857100  | -0.51070100 |
| H  | -5.26539800 | 4.63555800  | -0.71024900 |
| H  | -5.39514600 | -4.52796400 | -0.69504200 |
| H  | -3.34865800 | -5.75458700 | -0.49569900 |
| H  | -1.13540300 | -7.09791500 | -0.65732400 |
| H  | 6.84621500  | -2.60460000 | -0.24830000 |
| H  | 6.88461500  | -0.09277200 | -0.14036100 |
| H  | 6.91145200  | 2.42091800  | -0.26319100 |
| Na | -1.44272700 | 0.02726700  | 0.75524000  |
| O  | -1.70214800 | 0.08397000  | 3.14127900  |
| H  | -2.63217300 | 0.19636300  | 3.37949000  |
| H  | -1.24152000 | 0.85698700  | 3.49466000  |
| O  | -1.35086000 | 0.10353600  | -1.61777600 |
| H  | -1.64617900 | 0.83289300  | -2.17794100 |
| H  | -1.02857000 | -0.57763600 | -2.22188600 |

H<sub>2</sub>O-Na<sup>+</sup>@V<sub>B</sub> *h*-BN-H<sub>2</sub>O (reactant)

|   |             |             |             |
|---|-------------|-------------|-------------|
| B | -0.79480600 | -1.31454200 | 0.14879900  |
| B | -1.00475900 | 1.19977800  | 0.17992400  |
| B | -3.04792900 | -0.22603600 | -0.03430100 |
| B | -3.25134100 | 2.27878700  | -0.06414000 |
| B | -1.16477800 | 3.69291500  | -0.04810800 |
| B | 1.11193100  | 2.60530600  | 0.09576700  |
| B | 3.41505200  | 1.50292000  | 0.04616000  |
| B | 3.62910600  | -1.00814700 | 0.03347400  |
| B | 1.51542700  | -2.41168200 | 0.04965800  |
| B | -0.58254100 | -3.81637400 | -0.05603400 |

|   |             |             |             |
|---|-------------|-------------|-------------|
| B | -2.85684700 | -2.72934900 | -0.05447000 |
| N | -1.40580000 | -2.62138500 | 0.03190800  |
| N | -1.59257300 | -0.11446100 | 0.08614600  |
| N | -3.66282800 | -1.53187200 | -0.07476500 |
| N | 0.86783500  | -3.70282800 | -0.07421900 |
| N | 0.62323200  | -1.34076500 | 0.45030900  |
| N | 2.94809500  | -2.27509800 | -0.09675800 |
| N | 2.99377000  | 0.19712700  | 0.50654800  |
| N | 0.37777900  | 1.43138600  | 0.52465800  |
| N | 2.55325400  | 2.66196500  | -0.05052300 |
| N | 0.28735000  | 3.78905000  | -0.05463400 |
| N | -1.80599100 | 2.39277400  | 0.04222400  |
| N | -3.85884000 | 0.96933400  | -0.08026000 |
| B | -5.11587500 | -1.64584500 | -0.15844400 |
| B | -5.31115500 | 0.85932700  | -0.17009400 |
| B | 0.91667500  | 5.09039900  | -0.24187200 |
| B | 3.17317700  | 3.97285100  | -0.28166400 |
| B | 3.75331400  | -3.47773700 | -0.32737500 |
| B | 1.68021300  | -4.90131100 | -0.26153100 |
| N | -1.21234300 | -5.11448600 | -0.16125100 |
| N | -3.47012100 | -4.03997900 | -0.13053300 |
| N | -4.05394200 | 3.48105000  | -0.15866300 |
| N | -1.97876600 | 4.88197400  | -0.17273100 |
| N | 4.85578300  | 1.60897400  | -0.17242700 |
| N | 5.06489200  | -0.89164000 | -0.18719000 |
| B | -2.65365800 | -5.22460300 | -0.17404300 |
| B | -3.42121500 | 4.77439600  | -0.20233800 |
| B | 5.66704500  | 0.41794200  | -0.27123300 |

|   |             |             |             |
|---|-------------|-------------|-------------|
| B | -0.39957500 | -6.30953500 | -0.28224300 |
| B | -1.34643500 | 6.18157900  | -0.29547500 |
| N | 1.01495800  | -6.16854100 | -0.33321500 |
| N | 0.07494100  | 6.24728700  | -0.33007000 |
| N | 2.34403700  | 5.13502000  | -0.34148900 |
| N | 3.09835300  | -4.74588600 | -0.37995200 |
| N | 5.17691400  | -3.33527400 | -0.46538200 |
| N | 4.60170100  | 4.04555500  | -0.41483600 |
| B | -4.91685300 | -4.15228300 | -0.19477000 |
| B | -5.49985600 | 3.36860700  | -0.23355400 |
| B | 5.85237700  | -2.08850000 | -0.41780600 |
| B | 5.45564500  | 2.91416400  | -0.37654100 |
| N | -6.08036600 | 2.07171100  | -0.22816800 |
| N | -5.89558000 | -0.44648000 | -0.19611000 |
| N | -5.69082400 | -2.96154400 | -0.19926200 |
| H | 7.03074700  | -2.01955900 | -0.57189400 |
| H | 6.83638000  | 0.51658000  | -0.46617100 |
| H | 6.63207600  | 3.02608700  | -0.51941600 |
| H | -3.16268600 | -6.29825100 | -0.23126500 |
| H | -0.90413600 | -7.38553100 | -0.34679500 |
| H | -5.44032600 | -5.22049100 | -0.24526400 |
| H | -6.18201300 | 4.34230800  | -0.29915000 |
| H | -4.08397200 | 5.75984400  | -0.27322000 |
| H | -2.00073600 | 7.17270300  | -0.37460600 |
| H | 1.56219200  | -7.01183500 | -0.44105600 |
| H | 3.66246000  | -5.57280000 | -0.52507700 |
| H | 5.73790700  | -4.16188700 | -0.62189200 |
| H | 5.03357200  | 4.94841100  | -0.55927800 |



|    |             |             |             |
|----|-------------|-------------|-------------|
| H  | 2.78930600  | 6.03214500  | -0.48327500 |
| H  | 0.49448800  | 7.16086500  | -0.43779700 |
| H  | -7.08821700 | 2.01507000  | -0.28502300 |
| H  | -6.90176100 | -0.52575300 | -0.26018000 |
| H  | -6.69562500 | -3.06127800 | -0.25000600 |
| Na | 1.37049800  | 0.08817300  | 2.25702300  |
| O  | 1.45658300  | 0.09445300  | 4.50570200  |
| H  | 2.24796400  | 0.00509100  | 5.05217100  |
| H  | 0.72641200  | 0.20959600  | 5.12728000  |
| O  | 2.52343900  | 0.31178400  | -2.62090000 |
| H  | 2.86359600  | -0.39565000 | -3.18347600 |
| H  | 2.69056600  | 1.11864100  | -3.12451100 |

H<sub>2</sub>O-K@V<sub>B</sub> *h*-BN-H<sub>2</sub>O

|   |             |             |             |
|---|-------------|-------------|-------------|
| B | -1.16672200 | -1.09426400 | -0.32887400 |
| B | -0.65889500 | 1.50808300  | 0.41799700  |
| B | -2.92930600 | 0.60567900  | -0.03784600 |
| B | -2.46471800 | 3.08085100  | -0.26185600 |
| B | -0.09108700 | 3.88938700  | 0.04025300  |
| B | 1.67827200  | 2.26702700  | 0.81885000  |
| B | 3.88255600  | 0.46407000  | 0.65935600  |
| B | 3.37826400  | -1.97069000 | 0.10020700  |
| B | 0.70242800  | -2.70993100 | -0.52581900 |
| B | -1.59864300 | -3.52848900 | 0.00140300  |
| B | -3.48449000 | -1.85926400 | 0.15117100  |
| N | -2.08888800 | -2.16419800 | 0.01950900  |
| N | -1.49361300 | 0.31732100  | 0.03331500  |
| N | -3.90745200 | -0.47758000 | 0.03732700  |
| N | -0.18374200 | -3.81705200 | -0.20087800 |

|   |             |             |             |
|---|-------------|-------------|-------------|
| N | -0.00522300 | -1.56012400 | -1.02954300 |
| N | 2.21925200  | -2.85593800 | -0.29198300 |
| N | 3.40907800  | -0.84820500 | 1.00777800  |
| N | 0.52451300  | 1.52144900  | 1.22346600  |
| N | 3.16864700  | 1.79821700  | 0.71718300  |
| N | 1.31177600  | 3.60947800  | 0.35149900  |
| N | -1.07732400 | 2.83138700  | -0.00384900 |
| N | -3.40271400 | 1.97626300  | -0.18404500 |
| B | -5.32894100 | -0.18454300 | 0.02574800  |
| B | -4.82177500 | 2.25517500  | -0.30197200 |
| B | 2.28899300  | 4.66007700  | 0.23911900  |
| B | 4.10497600  | 2.92304600  | 0.51532900  |
| B | 2.66409900  | -4.24847500 | -0.48439800 |
| B | 0.31933800  | -5.16565500 | -0.15916200 |
| N | -2.53380000 | -4.61459200 | 0.24052000  |
| N | -4.42837800 | -2.95245200 | 0.33276800  |
| N | -2.89767400 | 4.44432300  | -0.52754900 |
| N | -0.51690100 | 5.24063800  | -0.29430900 |
| N | 5.24302100  | 0.28183100  | 0.10313400  |
| N | 4.73827300  | -2.17002600 | -0.42201500 |
| B | -3.94337800 | -4.31368400 | 0.39789400  |
| B | -1.91587400 | 5.50430900  | -0.56366300 |
| B | 5.64496200  | -1.03261400 | -0.38302700 |
| B | -2.02839100 | -5.97412200 | 0.28532900  |
| B | 0.46882100  | 6.30195200  | -0.33839000 |
| N | -0.63297400 | -6.21717100 | 0.09317200  |
| N | 1.83537000  | 5.99026100  | -0.07954100 |
| N | 3.65593400  | 4.28761600  | 0.43946600  |

|   |             |             |             |
|---|-------------|-------------|-------------|
| N | 1.72435700  | -5.33869400 | -0.41602500 |
| N | 4.06689000  | -4.50371500 | -0.75266200 |
| N | 5.52873700  | 2.68460800  | 0.36263400  |
| B | -5.84210500 | -2.63984600 | 0.37235600  |
| B | -4.31234800 | 4.70322600  | -0.68744700 |
| B | 5.08102300  | -3.50974900 | -0.84297800 |
| B | 6.11263300  | 1.43407300  | 0.05219900  |
| N | -5.22564400 | 3.61760700  | -0.55503300 |
| N | -5.75427900 | 1.17217800  | -0.16402400 |
| N | -6.24748800 | -1.28458700 | 0.20643000  |
| H | 6.18111100  | -3.77802000 | -1.21984600 |
| H | 6.74525900  | -1.16451200 | -0.82371300 |
| H | 7.26215900  | 1.33764200  | -0.25258200 |
| H | -4.71689100 | -5.20531300 | 0.57024100  |
| H | -2.76958400 | -6.88934000 | 0.47951900  |
| H | -6.65616500 | -3.49901900 | 0.52776000  |
| H | -4.71344100 | 5.80460400  | -0.91412100 |
| H | -2.26416100 | 6.61878800  | -0.80866100 |
| H | 0.14755400  | 7.42244300  | -0.59540700 |
| H | -0.32281500 | -7.17810200 | 0.13801600  |
| H | 2.09501800  | -6.27694800 | -0.48780500 |
| H | 4.33587900  | -5.45255100 | -0.97602600 |
| H | 6.12557100  | 3.49718500  | 0.28600100  |
| H | 4.36815400  | 4.99594200  | 0.32150000  |
| H | 2.50349200  | 6.74629200  | -0.13782000 |
| H | -6.20904000 | 3.82648500  | -0.65932900 |
| H | -6.74424400 | 1.37189100  | -0.21001300 |
| H | -7.24025600 | -1.09534000 | 0.22338600  |

|   |             |             |             |
|---|-------------|-------------|-------------|
| K | 1.41153300  | -0.35028800 | 0.26272500  |
| O | 0.10169600  | -0.93308000 | 2.68828000  |
| H | 0.17879500  | 0.03474700  | 2.55785900  |
| H | -0.84725900 | -1.10622300 | 2.64311000  |
| O | 1.73189500  | 0.13707600  | -2.39854200 |
| H | 2.14894200  | -0.09101500 | -3.23722200 |
| H | 0.99732900  | -0.50619000 | -2.27062300 |

H<sub>2</sub>O-K@V<sub>B</sub> *h*-BN-H<sub>2</sub>O (reactant)

|   |             |             |             |
|---|-------------|-------------|-------------|
| B | 1.51449600  | 0.13492300  | 0.62759300  |
| B | -0.79020900 | 0.93917400  | -0.03527100 |
| B | 1.22201300  | 2.48956800  | -0.21428000 |
| B | -1.05900700 | 3.47375200  | -0.32322300 |
| B | -3.08091000 | 2.16799100  | 0.22271100  |
| B | -2.96557900 | -0.25696000 | 0.20508700  |
| B | -2.71412900 | -2.38767800 | -0.46222700 |
| B | -0.31051000 | -2.91958200 | -0.74292500 |
| B | 1.70590100  | -2.08826700 | 0.57093900  |
| B | 3.81061800  | -0.81795900 | 0.60520700  |
| B | 3.54396100  | 1.59641400  | 0.15197700  |
| N | 2.96887700  | 0.34693000  | 0.51454800  |
| N | 0.63413800  | 1.18165200  | 0.05748000  |
| N | 2.66072000  | 2.69347600  | -0.18792100 |
| N | 3.17634400  | -2.10332600 | 0.59091400  |
| N | 0.96092500  | -1.04501400 | 1.14212400  |
| N | 1.02599300  | -3.12830500 | -0.23079900 |
| N | -1.35949200 | -1.84129900 | -0.49390700 |
| N | -1.54701200 | -0.36728700 | -0.07620000 |
| N | -3.63053900 | -1.50703600 | 0.16158900  |

|   |             |             |             |
|---|-------------|-------------|-------------|
| N | -3.73590300 | 0.91370400  | 0.45169300  |
| N | -1.65507600 | 2.16306200  | -0.04844500 |
| N | 0.36236700  | 3.62096300  | -0.49678400 |
| B | 3.24256000  | 3.97191200  | -0.53798400 |
| B | 0.94341000  | 4.91518100  | -0.82118600 |
| B | -5.17848400 | 0.79159600  | 0.61420600  |
| B | -5.05629900 | -1.67105100 | 0.16773700  |
| B | 1.85950000  | -4.25158600 | -0.66667200 |
| B | 3.94713800  | -3.26399400 | 0.27357800  |
| N | 5.26342000  | -0.69975800 | 0.55615100  |
| N | 4.99816100  | 1.75093100  | 0.12399900  |
| N | -1.90297800 | 4.66808100  | -0.42396500 |
| N | -3.89262700 | 3.37325500  | 0.26155400  |
| N | -3.21364900 | -3.62125700 | -0.99897300 |
| N | -0.86308100 | -4.03495200 | -1.57734200 |
| B | 5.84595100  | 0.60275000  | 0.35770800  |
| B | -3.29809200 | 4.62813800  | -0.10137000 |
| B | -2.24662800 | -4.38296100 | -1.73157000 |
| B | 6.05301600  | -1.91358400 | 0.50049900  |
| B | -5.30271500 | 3.29335900  | 0.57201400  |
| N | 5.38731600  | -3.17012200 | 0.37370400  |
| N | -5.90968400 | 2.01809800  | 0.77178300  |
| N | -5.81200200 | -0.50965700 | 0.54690700  |
| N | 3.21272100  | -4.40575500 | -0.19667300 |
| N | 1.32383600  | -5.19209100 | -1.60990500 |
| N | -5.52121300 | -2.95818900 | -0.28536100 |
| B | 5.56116800  | 3.03779300  | -0.20461500 |
| B | -1.33427800 | 5.94127200  | -0.81759500 |

|   |             |             |             |
|---|-------------|-------------|-------------|
| B | 0.00758900  | -5.08164300 | -2.09352900 |
| B | -4.63346400 | -3.90028300 | -0.90773400 |
| N | 0.05948800  | 6.02873300  | -1.04435100 |
| N | 2.36437800  | 5.05022300  | -0.88439400 |
| N | 4.67662500  | 4.10924000  | -0.51990700 |
| H | -0.40486600 | -5.86474200 | -2.89279700 |
| H | -2.58749800 | -5.30073800 | -2.40888800 |
| H | -5.07209400 | -4.91387200 | -1.36072000 |
| H | 7.03307400  | 0.73247700  | 0.34651000  |
| H | 7.24729800  | -1.86669900 | 0.51702400  |
| H | 6.74320500  | 3.20978300  | -0.21993000 |
| H | -2.03087700 | 6.90232100  | -0.94172000 |
| H | -3.95939300 | 5.61920300  | -0.13526700 |
| H | -5.96342400 | 4.28449800  | 0.64361700  |
| H | 5.96157700  | -3.99070200 | 0.23978000  |
| H | 3.72184800  | -5.21980700 | -0.51388400 |
| H | 1.91227300  | -5.92523700 | -1.97926600 |
| H | -6.50723700 | -3.17954300 | -0.29748900 |
| H | -6.82224500 | -0.54764300 | 0.56859000  |
| H | -6.90687000 | 1.99680000  | 0.93377200  |
| H | 0.44489600  | 6.92784400  | -1.29667800 |
| H | 2.75882400  | 5.95142300  | -1.11617700 |
| H | 5.08894800  | 5.00089500  | -0.75640000 |
| K | -1.20207700 | -1.79076600 | 2.50092800  |
| O | 0.59567200  | -0.62405000 | -2.74389100 |
| H | -0.31686500 | -0.83683200 | -2.50967900 |
| H | 0.86502000  | -0.00731700 | -2.04883000 |
| O | 0.91095900  | -1.26597400 | 3.86630600  |

|                                                                       |             |             |             |
|-----------------------------------------------------------------------|-------------|-------------|-------------|
| H                                                                     | 1.70242200  | -1.31047200 | 4.41311000  |
| H                                                                     | 1.21896500  | -1.09835800 | 2.93037600  |
| H <sub>2</sub> O-K <sup>+</sup> @V <sub>B</sub> h-BN-H <sub>2</sub> O |             |             |             |
| B                                                                     | -0.42577700 | -1.58879400 | 0.39219700  |
| B                                                                     | -1.32177900 | 0.91901900  | -0.35265500 |
| B                                                                     | -2.79935300 | -1.03290800 | -0.04145400 |
| B                                                                     | -3.72604400 | 1.32694300  | 0.07250200  |
| B                                                                     | -2.11589700 | 3.27847200  | -0.07237600 |
| B                                                                     | 0.32004000  | 2.86922000  | -0.49214000 |
| B                                                                     | 3.01882300  | 2.46533000  | 0.07509000  |
| B                                                                     | 3.89373300  | 0.09132400  | 0.58023000  |
| B                                                                     | 2.08303800  | -2.02941200 | 0.75024400  |
| B                                                                     | 0.50281100  | -3.88750400 | 0.08855400  |
| B                                                                     | -1.97910900 | -3.42787800 | -0.18657200 |
| N                                                                     | -0.63035400 | -2.96912900 | 0.06267700  |
| N                                                                     | -1.39328200 | -0.52167900 | 0.00819000  |
| N                                                                     | -3.05254100 | -2.45833500 | -0.14124000 |
| N                                                                     | 1.86286200  | -3.40121200 | 0.34435600  |
| N                                                                     | 0.79417800  | -1.50338500 | 1.20657500  |
| N                                                                     | 3.41898700  | -1.33432600 | 0.63890200  |
| N                                                                     | 3.20606700  | 1.31862800  | 0.95545200  |
| N                                                                     | -0.24882100 | 1.63849900  | -1.05219400 |
| N                                                                     | 1.75847400  | 3.19531100  | -0.25980400 |
| N                                                                     | -0.75247100 | 3.78664200  | -0.21979400 |
| N                                                                     | -2.38913700 | 1.84455500  | -0.10218200 |
| N                                                                     | -3.91632400 | -0.10657600 | 0.00668200  |
| B                                                                     | -4.42446900 | -2.95337300 | -0.24470700 |
| B                                                                     | -5.28773700 | -0.61222200 | 0.02397200  |

|   |             |             |             |
|---|-------------|-------------|-------------|
| B | -0.46522600 | 5.20691100  | -0.15117700 |
| B | 2.00482900  | 4.65705400  | -0.42064700 |
| B | 4.53099900  | -2.30553000 | 0.40897800  |
| B | 2.98833400  | -4.30693600 | 0.21439000  |
| N | 0.27057700  | -5.27921400 | -0.20997200 |
| N | -2.20054400 | -4.83660700 | -0.41841100 |
| N | -4.81379400 | 2.26175200  | 0.25611500  |
| N | -3.20138500 | 4.19622100  | 0.16239000  |
| N | 4.33167500  | 2.86918200  | -0.39856300 |
| N | 5.19145800  | 0.50445300  | 0.04507000  |
| B | -1.08263400 | -5.75162600 | -0.44500600 |
| B | -4.55254700 | 3.68294600  | 0.31270100  |
| B | 5.40751300  | 1.88598200  | -0.37919700 |
| B | 1.39781800  | -6.19611600 | -0.26408700 |
| B | -2.92002600 | 5.62266500  | 0.22983500  |
| N | 2.71534500  | -5.68630400 | -0.06042100 |
| N | -1.57446500 | 6.08493700  | 0.07584500  |
| N | 0.90884600  | 5.58355200  | -0.34768500 |
| N | 4.28453300  | -3.71770200 | 0.34836400  |
| N | 5.87824800  | -1.82904400 | 0.22578900  |
| N | 3.35494800  | 5.10431300  | -0.65682200 |
| B | -3.56665300 | -5.30973300 | -0.56763700 |
| B | -6.16848900 | 1.73986200  | 0.32600900  |
| B | 6.24350500  | -0.48824800 | -0.04752200 |
| B | 4.49957400  | 4.26447500  | -0.76387100 |
| N | -6.35645700 | 0.33655700  | 0.19032100  |
| N | -5.50045400 | -2.01846500 | -0.12757900 |
| N | -4.62133900 | -4.36227600 | -0.45867900 |



|   |             |             |             |
|---|-------------|-------------|-------------|
| H | 7.35319100  | -0.18971500 | -0.35367900 |
| H | 6.48371500  | 2.20336500  | -0.77111300 |
| H | 5.55638100  | 4.68988600  | -1.10554600 |
| H | -1.26960600 | -6.90691600 | -0.65716900 |
| H | 1.22789500  | -7.35238200 | -0.48740400 |
| H | -3.79542600 | -6.46114400 | -0.76410700 |
| H | -7.09625200 | 2.46944500  | 0.48022700  |
| H | -5.45195100 | 4.44336500  | 0.47896300  |
| H | -3.80037000 | 6.40198200  | 0.41354200  |
| H | 3.47889900  | -6.34574500 | -0.12902800 |
| H | 5.09345800  | -4.31465900 | 0.23301900  |
| H | 6.60811200  | -2.52374400 | 0.13538000  |
| H | 3.49872200  | 6.08891200  | -0.84041300 |
| H | 1.13350200  | 6.56842800  | -0.40929200 |
| H | -1.42638500 | 7.08372200  | 0.13268600  |
| H | -7.30839400 | -0.00302800 | 0.22539800  |
| H | -6.44997200 | -2.36553300 | -0.15649800 |
| H | -5.56489400 | -4.71427700 | -0.55088400 |
| K | 1.22120500  | 0.49727800  | 0.26354000  |
| O | 0.13106900  | 1.30299600  | 2.59427400  |
| H | 0.45960200  | 1.96770800  | 3.21290500  |
| H | -0.02480400 | 0.51076100  | 3.12580000  |
| O | 1.57607400  | -0.26728600 | -2.25921900 |
| H | 1.97469400  | -0.78640300 | -2.96819500 |
| H | 0.90965800  | 0.29996400  | -2.67427300 |

H<sub>2</sub>O-K<sup>+</sup>@V<sub>B</sub> *h*-BN-H<sub>2</sub>O (reactant)

|   |            |             |             |
|---|------------|-------------|-------------|
| B | 0.99941600 | 1.15873700  | -0.10088700 |
| B | 0.68281500 | -1.36470800 | -0.09690300 |

|   |             |             |             |
|---|-------------|-------------|-------------|
| B | 2.98024800  | -0.36951400 | 0.02335600  |
| B | 2.68842300  | -2.86650600 | 0.10464300  |
| B | 0.38189700  | -3.86090800 | 0.17731000  |
| B | -1.63463800 | -2.38221400 | 0.04703300  |
| B | -3.62750000 | -0.84313300 | 0.19465700  |
| B | -3.30547100 | 1.71100600  | 0.21457800  |
| B | -0.99614700 | 2.71361100  | 0.06448900  |
| B | 1.32222700  | 3.65366300  | 0.16348200  |
| B | 3.31328000  | 2.12306400  | 0.07499400  |
| N | 1.87247100  | 2.31333000  | 0.03778500  |
| N | 1.52806000  | -0.18862700 | -0.07561800 |
| N | 3.85367500  | 0.78453500  | 0.04827800  |
| N | -0.11617900 | 3.84963900  | 0.20851200  |
| N | -0.36894100 | 1.51220600  | -0.41803500 |
| N | -2.42364500 | 2.84436900  | 0.27024800  |
| N | -2.91238600 | 0.36624900  | -0.09652000 |
| N | -0.72842400 | -1.36943500 | -0.42730500 |
| N | -3.05301900 | -2.15966300 | 0.23924900  |
| N | -1.06126400 | -3.69875600 | 0.19899600  |
| N | 1.24509200  | -2.69664100 | 0.05474700  |
| N | 3.54236900  | -1.70289600 | 0.06502200  |
| B | 5.30138100  | 0.60381500  | 0.08120200  |
| B | 4.98983400  | -1.88455800 | 0.10374500  |
| B | -1.92793700 | -4.84888100 | 0.41441800  |
| B | -3.92418300 | -3.31550400 | 0.45859800  |
| B | -2.98194700 | 4.17793900  | 0.50393600  |
| B | -0.67167200 | 5.17589000  | 0.43538400  |
| N | 2.20385400  | 4.79568200  | 0.27772600  |

|   |             |             |            |
|---|-------------|-------------|------------|
| N | 4.18584700  | 3.28075800  | 0.14700700 |
| N | 3.24959200  | -4.20169400 | 0.19965000 |
| N | 0.95567000  | -5.18296500 | 0.31058900 |
| N | -5.06452200 | -0.63144300 | 0.38563800 |
| N | -4.74989700 | 1.85869400  | 0.40929100 |
| B | 3.63557800  | 4.60694800  | 0.24367000 |
| B | 2.39010000  | -5.35134400 | 0.30028300 |
| B | -5.60909100 | 0.70144800  | 0.48205500 |
| B | 1.65175200  | 6.12574000  | 0.44973700 |
| B | 0.09277900  | -6.33733000 | 0.47233500 |
| N | 0.23811100  | 6.27871900  | 0.53250400 |
| N | -1.31670600 | -6.14049300 | 0.52374500 |
| N | -3.34061100 | -4.61859900 | 0.51140100 |
| N | -2.09642500 | 5.29790200  | 0.55366300 |
| N | -4.40735300 | 4.29573000  | 0.64979500 |
| N | -5.33661100 | -3.08027600 | 0.59024800 |
| B | 5.62538500  | 3.09571900  | 0.15189000 |
| B | 4.69010300  | -4.37749900 | 0.21797000 |
| B | -5.29598600 | 3.19136400  | 0.61385600 |
| B | -5.92482200 | -1.79034100 | 0.56590800 |
| N | 5.51159200  | -3.22213300 | 0.15775500 |
| N | 5.82633300  | -0.72566700 | 0.08809600 |
| N | 6.13647600  | 1.77253800  | 0.10819200 |
| H | -6.46809800 | 3.34208700  | 0.75707200 |
| H | -6.77657200 | 0.84741400  | 0.65498000 |
| H | -7.09903600 | -1.64789100 | 0.70078200 |
| H | 4.35805900  | 5.55050700  | 0.30356400 |
| H | 2.36656300  | 7.07454000  | 0.52908600 |

|   |             |             |             |
|---|-------------|-------------|-------------|
| H | 6.35855600  | 4.03321300  | 0.19455300  |
| H | 5.16862600  | -5.46601800 | 0.28290700  |
| H | 2.85827600  | -6.44216700 | 0.38105700  |
| H | 0.55313100  | -7.43102500 | 0.56787700  |
| H | -0.11993800 | 7.21335100  | 0.67502100  |
| H | -2.49031000 | 6.21589300  | 0.71255600  |
| H | -4.81192200 | 5.20942300  | 0.80488400  |
| H | -5.95514000 | -3.86762900 | 0.73154300  |
| H | -3.94915300 | -5.41245000 | 0.66158200  |
| H | -1.89463100 | -6.95887000 | 0.65935700  |
| H | 6.51283500  | -3.36047900 | 0.17843500  |
| H | 6.82935000  | -0.85091000 | 0.11720500  |
| H | 7.14116700  | 1.66087600  | 0.12140200  |
| K | -1.50818700 | 0.20733700  | -2.63667000 |
| O | -0.70246700 | 0.05176200  | 2.39496700  |
| H | -0.54979800 | 0.02227800  | 3.34839800  |
| H | -1.65606400 | 0.16325200  | 2.29840900  |
| O | -1.40300800 | 0.11414300  | -5.32276400 |
| H | -1.64507300 | 0.80067700  | -5.95793700 |
| H | -1.07269900 | -0.61269100 | -5.86693300 |
